# Supplementary material for: Knockout of OsWRKY71 impairs Bph15-mediated resistance against brown planthopper in rice
Source: Front Plant Sci. 2023 Nov 2;14:1260526. doi: 10.3389/fpls.2023.1260526 (PMC10652391; doi:10.3389/fpls.2023.1260526)
Supplement: Supplementary file 9 [file Table_3.xlsx]

## Sheet: Table S3-1
Table S3-1 GO enrichment analysis of 1387 DEGs.
GO_ID	GO_Term	GO_function	GO_class	Genes	S gene number	TS gene number	B gene number	TB gene number	pvalue
GO:0009611	response to wounding	biological_process	5	LOC_Os08g39850;LOC_Os02g48770;LOC_Os03g60080;LOC_Os09g23660;LOC_Os03g08320;LOC_Os12g36220;LOC_Os03g52860;LOC_Os03g28940;LOC_Os09g25060;LOC_Os01g60020;LOC_Os09g23650;LOC_Os12g02330;LOC_Os05g35290;LOC_Os12g36210;LOC_Os10g25290;LOC_Os01g63930;LOC_Os04g54240;LOC_Os04g43800;LOC_Os08g33160;LOC_Os06g20960;LOC_Os04g48850;LOC_Os06g13560;LOC_Os05g37250;LOC_Os03g08330;LOC_Os01g09800;LOC_Os04g37430;LOC_Os03g…	37	1155	228	26868	3.29414e-12
GO:0010200	response to chitin	biological_process	7	LOC_Os11g47460;LOC_Os01g53920;LOC_Os02g09480;LOC_Os09g16510;LOC_Os04g21950;LOC_Os09g25060;LOC_Os01g61080;LOC_Os02g32590;LOC_Os03g04070;LOC_Os03g17700;LOC_Os12g02450;LOC_Os01g14440;LOC_Os12g37970;LOC_Os05g45410;LOC_Os02g45710;LOC_Os04g43680;LOC_Os04g34140;LOC_Os09g37050;LOC_Os05g27730;LOC_Os05g25770;LOC_Os06g51070;LOC_Os02g52210;LOC_Os10g41330	23	1155	107	26868	1.34623e-10
GO:0046658	anchored component of plasma membrane	cellular_component	6	LOC_Os03g45390;LOC_Os02g20560;LOC_Os08g37670;LOC_Os07g14740;LOC_Os12g06220;LOC_Os03g02400;LOC_Os07g35560;LOC_Os01g71860;LOC_Os03g50160;LOC_Os02g44670;LOC_Os04g33640;LOC_Os09g38540;LOC_Os08g37660;LOC_Os01g55820;LOC_Os05g31140;LOC_Os10g20650;LOC_Os08g14700;LOC_Os01g71670;LOC_Os03g55120;LOC_Os05g41030;LOC_Os08g17160;LOC_Os12g26880;LOC_Os01g71350;LOC_Os10g35460;LOC_Os03g57880;LOC_Os07g35510;LOC_Os09g…	32	1155	237	26868	1.05344e-08
GO:0009751	response to salicylic acid	biological_process	6	LOC_Os04g44910;LOC_Os03g60080;LOC_Os04g44900;LOC_Os02g06640;LOC_Os12g26290;LOC_Os09g16510;LOC_Os12g03150;LOC_Os03g56160;LOC_Os06g50950;LOC_Os04g40630;LOC_Os05g25770;LOC_Os09g25060;LOC_Os08g38220;LOC_Os11g04530;LOC_Os02g09480;LOC_Os12g02330;LOC_Os11g03440;LOC_Os11g02369;LOC_Os11g47460;LOC_Os07g03840;LOC_Os01g65370;LOC_Os12g37970;LOC_Os01g47760;LOC_Os12g02450;LOC_Os01g63690	25	1155	166	26868	4.86207e-08
GO:2000022	regulation of jasmonic acid mediated signaling pathway	biological_process	8	LOC_Os10g25290;LOC_Os03g08330;LOC_Os01g09800;LOC_Os03g28940;LOC_Os09g23660;LOC_Os09g23650;LOC_Os07g42370;LOC_Os03g08320;LOC_Os06g14406;LOC_Os02g09480;LOC_Os08g33160	11	1155	33	26868	7.14888e-08
GO:1903507	negative regulation of nucleic acid-templated transcription	biological_process	10	LOC_Os09g23650;LOC_Os07g02800;LOC_Os07g42370;LOC_Os09g23660;LOC_Os03g08320;LOC_Os08g33160;LOC_Os10g25290;LOC_Os03g28940;LOC_Os03g08330	9	1155	21	26868	8.94827e-08
GO:0050832	defense response to fungus	biological_process	8	LOC_Os03g04060;LOC_Os05g25770;LOC_Os04g49690;LOC_Os01g53920;LOC_Os11g35410;LOC_Os05g46020;LOC_Os04g58710;LOC_Os02g09480;LOC_Os09g39960;LOC_Os03g58580;LOC_Os11g40840;LOC_Os07g12510;LOC_Os09g25060;LOC_Os09g23690;LOC_Os11g47760;LOC_Os12g26290;LOC_Os01g09800;LOC_Os06g51060;LOC_Os01g61080;LOC_Os01g33160;LOC_Os12g02450;LOC_Os11g35450;LOC_Os02g52210;LOC_Os10g39680;LOC_Os05g27730;LOC_Os03g30470	26	1155	190	26868	1.88743e-07
GO:0031347	regulation of defense response	biological_process	7	LOC_Os12g02450;LOC_Os09g25060;LOC_Os09g23650;LOC_Os02g03760;LOC_Os11g34080;LOC_Os08g33160;LOC_Os09g23660;LOC_Os10g25290;LOC_Os03g28940;LOC_Os05g25770;LOC_Os07g42370;LOC_Os03g08320;LOC_Os09g16510;LOC_Os03g08330	14	1155	63	26868	3.54047e-07
GO:0004568	chitinase activity	molecular_function	7	LOC_Os10g28120;LOC_Os11g37960;LOC_Os03g04060;LOC_Os10g28080;LOC_Os06g51060;LOC_Os05g15770;LOC_Os11g37950;LOC_Os04g41640;LOC_Os03g30470;LOC_Os10g39680;LOC_Os06g24990;LOC_Os06g25010;LOC_Os01g47070	13	1155	62	26868	1.8688e-06
GO:0006979	response to oxidative stress	biological_process	5	LOC_Os03g22020;LOC_Os12g26290;LOC_Os01g21250;LOC_Os10g02070;LOC_Os09g20390;LOC_Os02g45930;LOC_Os03g13210;LOC_Os03g22010;LOC_Os12g36870;LOC_Os03g17700;LOC_Os04g49370;LOC_Os06g35480;LOC_Os04g41960;LOC_Os01g01650;LOC_Os01g53730;LOC_Os05g44900;LOC_Os05g35290;LOC_Os07g01020;LOC_Os06g35520;LOC_Os01g63690;LOC_Os04g48850;LOC_Os04g43800;LOC_Os01g01660;LOC_Os02g14170	24	1155	194	26868	3.42207e-06
GO:0016747	transferase activity, transferring acyl groups other than amino-acyl groups	molecular_function	6	LOC_Os11g07960;LOC_Os05g37660;LOC_Os11g27170;LOC_Os06g49660;LOC_Os06g06180;LOC_Os01g08380;LOC_Os06g39390;LOC_Os10g35950;LOC_Os09g34930;LOC_Os11g31090;LOC_Os05g49290;LOC_Os01g63480;LOC_Os03g53360;LOC_Os06g15170;LOC_Os02g11070;LOC_Os01g42870;LOC_Os05g08640;LOC_Os06g39470	18	1155	125	26868	6.79502e-06
GO:0008061	chitin binding	molecular_function	5	LOC_Os10g28080;LOC_Os10g39680;LOC_Os10g28120;LOC_Os11g37960;LOC_Os06g25010;LOC_Os05g15770;LOC_Os03g04060;LOC_Os02g45750;LOC_Os11g37950;LOC_Os01g47070;LOC_Os06g24990;LOC_Os03g30470	12	1155	60	26868	7.78691e-06
GO:0009753	response to jasmonic acid	biological_process	6	LOC_Os04g48850;LOC_Os12g03040;LOC_Os03g20090;LOC_Os12g03150;LOC_Os03g60080;LOC_Os02g09480;LOC_Os01g37590;LOC_Os11g03440;LOC_Os12g37970;LOC_Os12g02450;LOC_Os01g70110;LOC_Os04g37430;LOC_Os04g43680;LOC_Os05g25770;LOC_Os11g45740;LOC_Os01g65370;LOC_Os11g47460	17	1155	116	26868	9.56803e-06
GO:0005576	extracellular region	cellular_component	3	LOC_Os11g14400;LOC_Os10g35294;LOC_Os11g37950;LOC_Os11g37960;LOC_Os03g19990;LOC_Os01g58640;LOC_Os01g11730;LOC_Os06g35520;LOC_Os01g11620;LOC_Os03g04060;LOC_Os01g63930;LOC_Os10g32580;LOC_Os01g11750;LOC_Os10g28080;LOC_Os06g35480;LOC_Os11g33270;LOC_Os11g40840;LOC_Os06g27560;LOC_Os09g23220;LOC_Os10g05660;LOC_Os12g38150;LOC_Os02g09610;LOC_Os01g45060;LOC_Os03g14050;LOC_Os01g07370;LOC_Os11g45990;LOC_Os06g…	91	1155	1338	26868	1.03505e-05
GO:0009414	response to water deprivation	biological_process	5	LOC_Os05g31750;LOC_Os01g21250;LOC_Os03g06360;LOC_Os12g24320;LOC_Os05g27730;LOC_Os06g11860;LOC_Os11g10510;LOC_Os05g31760;LOC_Os12g03290;LOC_Os03g23010;LOC_Os03g44380;LOC_Os08g34240;LOC_Os09g31200;LOC_Os03g11550;LOC_Os09g31498;LOC_Os03g09170;LOC_Os03g13840;LOC_Os11g03440;LOC_Os08g05910;LOC_Os02g45450;LOC_Os03g04770;LOC_Os04g52090;LOC_Os02g44870;LOC_Os01g61080;LOC_Os01g28500;LOC_Os02g09480	26	1155	235	26868	1.07044e-05
GO:0003714	transcription corepressor activity	molecular_function	5	LOC_Os03g08330;LOC_Os07g42370;LOC_Os03g08320;LOC_Os09g23660;LOC_Os08g33160;LOC_Os10g25290;LOC_Os03g28940;LOC_Os09g23650	8	1155	27	26868	1.21655e-05
GO:0003700	DNA-binding transcription factor activity	molecular_function	4	LOC_Os03g55590;LOC_Os01g65370;LOC_Os11g47460;LOC_Os08g38220;LOC_Os03g08490;LOC_Os01g60020;LOC_Os09g25070;LOC_Os09g33882;LOC_Os02g09830;LOC_Os10g02584;LOC_Os10g41330;LOC_Os01g01870;LOC_Os06g44010;LOC_Os10g41230;LOC_Os02g49440;LOC_Os03g20090;LOC_Os01g70110;LOC_Os06g13030;LOC_Os03g55540;LOC_Os06g45890;LOC_Os02g45760;LOC_Os12g02450;LOC_Os07g48550;LOC_Os04g21950;LOC_Os02g49840;LOC_Os01g15640;LOC_Os12g…	90	1155	1353	26868	2.67376e-05
GO:0030247	polysaccharide binding	molecular_function	5	LOC_Os05g31140;LOC_Os01g51570;LOC_Os01g71340;LOC_Os01g71670;LOC_Os10g20650;LOC_Os04g33640;LOC_Os01g71860;LOC_Os03g45390;LOC_Os09g36280;LOC_Os03g57880;LOC_Os08g14700;LOC_Os07g35510;LOC_Os01g71350;LOC_Os07g35560;LOC_Os01g55820	15	1155	110	26868	7.40052e-05
GO:0016702	oxidoreductase activity, acting on single donors with incorporation of molecular oxygen, incorporation of two atoms of oxygen	molecular_function	6	LOC_Os01g38580;LOC_Os12g26290;LOC_Os02g47510;LOC_Os12g24800	4	1155	7	26868	0.000107132
GO:0016740	transferase activity	molecular_function	4	LOC_Os03g53360;LOC_Os05g08640;LOC_Os02g56970;LOC_Os01g63480;LOC_Os06g06180;LOC_Os03g19310;LOC_Os11g31090;LOC_Os05g37660;LOC_Os01g08380;LOC_Os12g24020;LOC_Os06g39470;LOC_Os03g38540;LOC_Os11g07960;LOC_Os06g45890;LOC_Os03g18820;LOC_Os07g23120;LOC_Os02g28170;LOC_Os06g39390;LOC_Os01g42870	19	1155	168	26868	0.000118089
GO:0003333	amino acid transmembrane transport	biological_process	11	LOC_Os08g03350;LOC_Os12g09300;LOC_Os12g08090;LOC_Os01g66010;LOC_Os03g14915;LOC_Os01g63854;LOC_Os01g41420;LOC_Os03g60260;LOC_Os01g68050;LOC_Os01g61044;LOC_Os04g47780;LOC_Os12g08130	12	1155	78	26868	0.000118691
GO:0009723	response to ethylene	biological_process	6	LOC_Os12g03150;LOC_Os09g36580;LOC_Os11g47460;LOC_Os11g45740;LOC_Os04g38900;LOC_Os12g37970;LOC_Os04g49690;LOC_Os11g37960;LOC_Os01g21250;LOC_Os11g02369;LOC_Os02g09480;LOC_Os04g43680;LOC_Os12g02330;LOC_Os10g41200;LOC_Os03g20090;LOC_Os04g48850;LOC_Os11g37950	17	1155	143	26868	0.000144265
GO:0009699	phenylpropanoid biosynthetic process	biological_process	7	LOC_Os04g57130;LOC_Os07g44280;LOC_Os04g43800;LOC_Os05g35290;LOC_Os12g09700;LOC_Os01g65700;LOC_Os03g28160;LOC_Os10g14011;LOC_Os12g07580;LOC_Os07g44260;LOC_Os10g18820;LOC_Os07g42520;LOC_Os07g44250	13	1155	92	26868	0.0001525
GO:0009964	negative regulation of flavonoid biosynthetic process	biological_process	8	LOC_Os04g53800;LOC_Os04g53860;LOC_Os04g53810;LOC_Os04g53850	4	1155	8	26868	0.000206952
GO:0033729	anthocyanidin reductase activity	molecular_function	7	LOC_Os04g53810;LOC_Os04g53850;LOC_Os04g53860;LOC_Os04g53800	4	1155	8	26868	0.000206952
GO:0051707	response to other organism	biological_process	6	LOC_Os08g39850;LOC_Os12g38150;LOC_Os03g14050;LOC_Os12g26290;LOC_Os09g36580;LOC_Os10g05660;LOC_Os03g52860;LOC_Os12g41720;LOC_Os07g05110	9	1155	52	26868	0.000337265
GO:0009620	response to fungus	biological_process	7	LOC_Os04g37430;LOC_Os03g60080;LOC_Os08g34790;LOC_Os04g46220;LOC_Os03g18770;LOC_Os11g44680;LOC_Os11g45740;LOC_Os03g20090;LOC_Os09g23690	9	1155	52	26868	0.000337265
GO:0042349	guiding stereospecific synthesis activity	molecular_function	5	LOC_Os04g57130;LOC_Os12g07580;LOC_Os07g44280;LOC_Os07g44250;LOC_Os07g42520;LOC_Os07g44260;LOC_Os12g09700;LOC_Os10g14011;LOC_Os03g28160;LOC_Os10g18820;LOC_Os01g65700	11	1155	79	26868	0.000547418
GO:0015171	amino acid transmembrane transporter activity	molecular_function	7	LOC_Os12g08090;LOC_Os01g61044;LOC_Os08g03350;LOC_Os01g63854;LOC_Os12g09300;LOC_Os01g41420;LOC_Os03g60260;LOC_Os01g66010;LOC_Os01g68050;LOC_Os04g47780;LOC_Os12g08130	11	1155	81	26868	0.000679363
GO:0006952	defense response	biological_process	5	LOC_Os09g25070;LOC_Os07g35260;LOC_Os07g35330;LOC_Os11g35410;LOC_Os12g30070;LOC_Os07g35004;LOC_Os11g35450;LOC_Os06g14406;LOC_Os01g21250;LOC_Os07g35390;LOC_Os07g35370;LOC_Os02g44670;LOC_Os11g12320;LOC_Os02g08440;LOC_Os11g11960;LOC_Os04g56430;LOC_Os06g44010;LOC_Os12g29690;LOC_Os04g48850;LOC_Os02g18070;LOC_Os06g11240;LOC_Os03g16950;LOC_Os07g38130;LOC_Os04g52090;LOC_Os11g04530;LOC_Os03g20090;LOC_Os06g…	56	1155	835	26868	0.000720726
GO:0048281	inflorescence morphogenesis	biological_process	5	LOC_Os03g04070;LOC_Os06g51070;LOC_Os11g40840	3	1155	5	26868	0.000742331
GO:0052689	carboxylic ester hydrolase activity	molecular_function	6	LOC_Os01g11620;LOC_Os01g66840;LOC_Os01g11750;LOC_Os09g28630;LOC_Os11g13570;LOC_Os08g43430;LOC_Os01g61200;LOC_Os03g15270;LOC_Os08g02094;LOC_Os06g11130;LOC_Os10g40290;LOC_Os01g11730;LOC_Os09g28230;LOC_Os02g09610;LOC_Os10g32580;LOC_Os06g50950;LOC_Os07g41590;LOC_Os02g57110;LOC_Os09g28660;LOC_Os06g11090	20	1155	210	26868	0.00077348
GO:0009535	chloroplast thylakoid membrane	cellular_component	8	LOC_Os10g38910;LOC_Os11g10990;LOC_Os07g04990;LOC_Os09g28480;LOC_Os04g32560;LOC_Os12g38640;LOC_Os05g41190;LOC_Os02g10390;LOC_Os05g48630;LOC_Os07g05365;LOC_Os02g51710;LOC_Os07g33660;LOC_Os04g55159;LOC_Os04g28990;LOC_Os03g17070;LOC_Os05g01950;LOC_Os04g30420;LOC_Os04g54630;LOC_Os01g52240;LOC_Os01g73540;LOC_Os04g31040;LOC_Os03g44380;LOC_Os08g28240;LOC_Os09g17740;LOC_Os04g46830	25	1155	291	26868	0.000850125
GO:0016491	oxidoreductase activity	molecular_function	4	LOC_Os07g46852;LOC_Os04g28990;LOC_Os04g53850;LOC_Os12g12470;LOC_Os11g10990;LOC_Os06g19530;LOC_Os01g65690;LOC_Os07g34570;LOC_Os12g12580;LOC_Os10g31780;LOC_Os12g12560;LOC_Os11g06590;LOC_Os04g33240;LOC_Os04g30420;LOC_Os04g53860;LOC_Os04g53800;LOC_Os07g04990;LOC_Os07g46920;LOC_Os01g01650;LOC_Os07g40250;LOC_Os03g53690;LOC_Os04g53810;LOC_Os01g01660;LOC_Os03g02460	24	1155	275	26868	0.000859103
GO:0004601	peroxidase activity	molecular_function	4	LOC_Os03g13210;LOC_Os02g14170;LOC_Os03g22020;LOC_Os03g13200;LOC_Os01g73200;LOC_Os01g22249;LOC_Os04g59260;LOC_Os04g59150;LOC_Os01g57730;LOC_Os03g36560;LOC_Os08g02110;LOC_Os12g26290;LOC_Os10g02070;LOC_Os04g59190;LOC_Os06g35480;LOC_Os02g09940;LOC_Os03g22010;LOC_Os06g35520	18	1155	182	26868	0.000898045
GO:0004553	hydrolase activity, hydrolyzing O-glycosyl compounds	molecular_function	6	LOC_Os05g31140;LOC_Os01g55820;LOC_Os08g14700;LOC_Os04g33640;LOC_Os11g33270;LOC_Os01g71340;LOC_Os07g35560;LOC_Os07g35510;LOC_Os03g45390;LOC_Os01g51570;LOC_Os04g51460;LOC_Os10g20650;LOC_Os01g71670;LOC_Os03g57880;LOC_Os01g71860;LOC_Os09g36280;LOC_Os09g23220;LOC_Os01g71350	18	1155	184	26868	0.00101905
GO:0000786	nucleosome	cellular_component	5	LOC_Os01g61920;LOC_Os06g06460;LOC_Os06g06480;LOC_Os05g51850;LOC_Os04g49420;LOC_Os11g05730	6	1155	28	26868	0.00103964
GO:0055114	oxidation-reduction process	biological_process	4	LOC_Os04g53800;LOC_Os04g38600;LOC_Os04g15920;LOC_Os08g43190;LOC_Os04g53850;LOC_Os12g12560;LOC_Os07g34570;LOC_Os12g12470;LOC_Os03g13210;LOC_Os02g47510;LOC_Os06g14324;LOC_Os08g16260;LOC_Os10g02070;LOC_Os04g28990;LOC_Os06g35520;LOC_Os04g31040;LOC_Os02g01510;LOC_Os01g47760;LOC_Os05g37250;LOC_Os01g63930;LOC_Os04g20164;LOC_Os11g10990;LOC_Os04g53810;LOC_Os03g44380;LOC_Os01g72260;LOC_Os06g35480;LOC_Os03g…	56	1155	852	26868	0.00114679
GO:0048046	apoplast	cellular_component	4	LOC_Os06g35480;LOC_Os11g47760;LOC_Os11g33270;LOC_Os07g02700;LOC_Os05g50710;LOC_Os03g22020;LOC_Os06g35520;LOC_Os01g28500;LOC_Os09g23220;LOC_Os04g15920;LOC_Os08g37840;LOC_Os02g52010;LOC_Os10g26940;LOC_Os04g38600;LOC_Os06g34790;LOC_Os04g55159;LOC_Os02g14170;LOC_Os11g17540;LOC_Os03g22010;LOC_Os05g38530;LOC_Os04g51460;LOC_Os04g58710	22	1155	251	26868	0.00130704
GO:0009627	systemic acquired resistance	biological_process	7	LOC_Os01g09800;LOC_Os01g28500;LOC_Os12g26290;LOC_Os11g37950;LOC_Os11g37960	5	1155	20	26868	0.00131436
GO:0005509	calcium ion binding	molecular_function	7	LOC_Os06g46950;LOC_Os09g24580;LOC_Os09g30490;LOC_Os04g41540;LOC_Os07g43800;LOC_Os03g21380;LOC_Os12g04360;LOC_Os03g19720;LOC_Os09g28510;LOC_Os05g13580;LOC_Os05g31750;LOC_Os03g31180;LOC_Os03g29770;LOC_Os08g04630;LOC_Os01g04330;LOC_Os01g62430;LOC_Os04g57350;LOC_Os01g70820;LOC_Os05g31760	19	1155	204	26868	0.00134589
GO:0009505	plant-type cell wall	cellular_component	6	LOC_Os03g28980;LOC_Os04g59260;LOC_Os01g22249;LOC_Os10g40290;LOC_Os03g56250;LOC_Os04g51460;LOC_Os01g73200;LOC_Os03g36560;LOC_Os09g39760;LOC_Os08g37840;LOC_Os02g52010;LOC_Os02g09940;LOC_Os03g04020;LOC_Os10g35070;LOC_Os04g59150;LOC_Os10g35460;LOC_Os03g19990;LOC_Os02g11040;LOC_Os04g59190;LOC_Os01g57730;LOC_Os10g39640;LOC_Os07g38130;LOC_Os08g02110	23	1155	271	26868	0.0015742
GO:0009506	plasmodesma	cellular_component	5	LOC_Os04g57350;LOC_Os08g25430;LOC_Os12g44110;LOC_Os07g38130;LOC_Os07g35004;LOC_Os12g06220;LOC_Os04g58710;LOC_Os12g36870;LOC_Os04g34140;LOC_Os07g35410;LOC_Os08g37840;LOC_Os02g33550;LOC_Os08g36570;LOC_Os07g35680;LOC_Os07g35390;LOC_Os03g03280;LOC_Os07g35310;LOC_Os09g39960;LOC_Os02g44670;LOC_Os03g16950;LOC_Os09g25760;LOC_Os01g68140;LOC_Os07g35690;LOC_Os07g35330;LOC_Os10g39640;LOC_Os01g03690;LOC_Os03g…	52	1155	791	26868	0.00168487
GO:0042742	defense response to bacterium	biological_process	8	LOC_Os01g74320;LOC_Os05g34270;LOC_Os12g02450;LOC_Os07g48500;LOC_Os11g37950;LOC_Os11g44680;LOC_Os11g47760;LOC_Os12g26290;LOC_Os11g40840;LOC_Os09g25060;LOC_Os02g09480;LOC_Os05g25770;LOC_Os03g17070;LOC_Os11g37960;LOC_Os08g27720;LOC_Os05g27730;LOC_Os02g09940;LOC_Os01g33160;LOC_Os01g61080	19	1155	209	26868	0.00178264
GO:0031408	oxylipin biosynthetic process	biological_process	11	LOC_Os12g26290;LOC_Os04g37430;LOC_Os06g11240;LOC_Os02g48770;LOC_Os06g20960;LOC_Os06g13560	6	1155	31	26868	0.00182037
GO:0045792	negative regulation of cell size	biological_process	7	LOC_Os03g04070;LOC_Os06g51070	2	1155	2	26868	0.00184643
GO:0004121	cystathionine beta-lyase activity	molecular_function	6	LOC_Os06g07860;LOC_Os06g07960	2	1155	2	26868	0.00184643
GO:0019279	L-methionine biosynthetic process from L-homoserine via cystathionine	biological_process	12	LOC_Os06g07860;LOC_Os06g07960	2	1155	2	26868	0.00184643
GO:0005516	calmodulin binding	molecular_function	5	LOC_Os02g03410;LOC_Os01g38980;LOC_Os12g36910;LOC_Os04g40630;LOC_Os05g10840;LOC_Os04g21950;LOC_Os03g48270;LOC_Os03g13300;LOC_Os12g36110;LOC_Os11g44600;LOC_Os04g42451;LOC_Os08g27720;LOC_Os08g02250;LOC_Os11g44680;LOC_Os06g29350;LOC_Os01g04280;LOC_Os01g51634	17	1155	180	26868	0.00202685
GO:0045551	cinnamyl-alcohol dehydrogenase activity	molecular_function	7	LOC_Os09g23560;LOC_Os06g44170;LOC_Os06g44180;LOC_Os09g23530;LOC_Os04g15920	5	1155	23	26868	0.00256301
GO:0006950	response to stress	biological_process	4	LOC_Os05g28740;LOC_Os03g19270;LOC_Os05g42230;LOC_Os12g36110;LOC_Os01g04280;LOC_Os11g44600;LOC_Os01g19820;LOC_Os12g36910	8	1155	57	26868	0.00289498
GO:0010224	response to UV-B	biological_process	8	LOC_Os01g65370;LOC_Os05g35290;LOC_Os02g06640;LOC_Os03g17700;LOC_Os04g43800;LOC_Os11g44680;LOC_Os07g01020;LOC_Os03g60509	8	1155	59	26868	0.00360328
GO:0006351	transcription, DNA-templated	biological_process	8	LOC_Os11g03300;LOC_Os01g50940;LOC_Os08g38220;LOC_Os03g47140;LOC_Os11g08210;LOC_Os01g65370;LOC_Os12g03150;LOC_Os03g52320;LOC_Os09g16510;LOC_Os02g49440;LOC_Os01g04800;LOC_Os02g01355;LOC_Os11g13930;LOC_Os10g41230;LOC_Os01g15640;LOC_Os07g12510;LOC_Os12g03040;LOC_Os04g21950;LOC_Os02g49840;LOC_Os11g29870;LOC_Os12g42400;LOC_Os09g11480;LOC_Os09g29960;LOC_Os12g37970;LOC_Os01g64360;LOC_Os09g28200;LOC_Os03g…	72	1155	1215	26868	0.00376362
GO:0010120	camalexin biosynthetic process	biological_process	9	LOC_Os01g61080;LOC_Os03g17700;LOC_Os05g27730	3	1155	8	26868	0.00377122
GO:0005978	glycogen biosynthetic process	biological_process	10	LOC_Os01g44220;LOC_Os05g50380;LOC_Os10g11140	3	1155	8	26868	0.00377122
GO:0032260	response to jasmonic acid stimulus involved in jasmonic acid and ethylene-dependent systemic resistance	biological_process	7	LOC_Os12g36240;LOC_Os12g36220;LOC_Os12g36210	3	1155	8	26868	0.00377122
GO:0009813	flavonoid biosynthetic process	biological_process	6	LOC_Os04g53810;LOC_Os04g53850;LOC_Os01g64540;LOC_Os04g53800;LOC_Os07g32620;LOC_Os04g46980;LOC_Os01g49230;LOC_Os12g37510;LOC_Os04g25440;LOC_Os06g18010;LOC_Os06g18790;LOC_Os06g09240;LOC_Os01g53460;LOC_Os01g53330;LOC_Os02g14680;LOC_Os06g39330;LOC_Os07g13770;LOC_Os03g60509;LOC_Os01g08440;LOC_Os11g25720;LOC_Os07g30620;LOC_Os07g34260;LOC_Os05g45180;LOC_Os04g42690;LOC_Os04g44240;LOC_Os04g53860;LOC_Os07g…	27	1155	366	26868	0.00477115
GO:0046916	cellular transition metal ion homeostasis	biological_process	11	LOC_Os04g39320;LOC_Os09g09830;LOC_Os04g39350;LOC_Os04g57200;LOC_Os07g48390;LOC_Os04g49260;LOC_Os10g36200;LOC_Os04g39380;LOC_Os03g22490;LOC_Os02g37300;LOC_Os02g37330	11	1155	104	26868	0.00512465
GO:0046914	transition metal ion binding	molecular_function	7	LOC_Os09g09830;LOC_Os10g36200;LOC_Os04g39350;LOC_Os07g48390;LOC_Os04g57200;LOC_Os02g37300;LOC_Os04g39320;LOC_Os02g37330;LOC_Os03g22490;LOC_Os04g39380;LOC_Os04g49260	11	1155	104	26868	0.00512465
GO:0009685	gibberellin metabolic process	biological_process	10	LOC_Os02g36210;LOC_Os06g44010;LOC_Os02g08440;LOC_Os09g25070	4	1155	17	26868	0.00516037
GO:0016161	beta-amylase activity	molecular_function	8	LOC_Os03g22790;LOC_Os10g41550;LOC_Os03g04770	3	1155	9	26868	0.00547691
GO:0020037	heme binding	molecular_function	6	LOC_Os03g03910;LOC_Os12g26290;LOC_Os02g14170;LOC_Os06g35520;LOC_Os03g13210;LOC_Os03g13200;LOC_Os06g35480;LOC_Os10g02070;LOC_Os01g72260;LOC_Os03g22010;LOC_Os01g11230;LOC_Os05g37250;LOC_Os08g16260;LOC_Os03g22020;LOC_Os01g63930	15	1155	167	26868	0.00575376
GO:0005886	plasma membrane	cellular_component	4	LOC_Os04g44900;LOC_Os08g43120;LOC_Os02g20560;LOC_Os06g07200;LOC_Os11g05320;LOC_Os01g04570;LOC_Os01g42370;LOC_Os02g45780;LOC_Os05g47770;LOC_Os06g17900;LOC_Os10g30600;LOC_Os05g35650;LOC_Os05g07060;LOC_Os02g02140;LOC_Os04g51460;LOC_Os07g05110;LOC_Os02g45750;LOC_Os01g42380;LOC_Os07g03840;LOC_Os05g50710;LOC_Os12g28710;LOC_Os04g30240;LOC_Os02g46620;LOC_Os04g49420;LOC_Os12g31860;LOC_Os01g36620;LOC_Os11g…	183	1155	3569	26868	0.00577642
GO:0007275	multicellular organism development	biological_process	4	LOC_Os12g03290;LOC_Os01g64310;LOC_Os07g30950;LOC_Os11g03300;LOC_Os01g05744;LOC_Os08g36860;LOC_Os11g03540;LOC_Os07g48550;LOC_Os08g34240;LOC_Os07g04930;LOC_Os11g08210;LOC_Os03g04070;LOC_Os01g15640;LOC_Os12g03040;LOC_Os08g10080;LOC_Os01g60020;LOC_Os01g70110;LOC_Os06g51070;LOC_Os02g47470;LOC_Os12g03110;LOC_Os03g60080	21	1155	267	26868	0.00591909
GO:0009409	response to cold	biological_process	5	LOC_Os05g27730;LOC_Os10g17454;LOC_Os12g24320;LOC_Os01g21250;LOC_Os05g31750;LOC_Os03g09170;LOC_Os11g10510;LOC_Os01g61080;LOC_Os03g17700;LOC_Os02g11070;LOC_Os06g11860;LOC_Os06g15170;LOC_Os03g13840;LOC_Os05g31760;LOC_Os10g41550;LOC_Os11g47760;LOC_Os07g34570;LOC_Os02g01355;LOC_Os04g51150;LOC_Os02g45450	20	1155	250	26868	0.00592811
GO:0042335	cuticle development	biological_process	5	LOC_Os05g41030;LOC_Os06g15170;LOC_Os06g19530;LOC_Os09g34930;LOC_Os05g49290	5	1155	28	26868	0.00626807
GO:1901430	positive regulation of syringal lignin biosynthetic process	biological_process	9	LOC_Os02g14170;LOC_Os03g22010;LOC_Os06g35480;LOC_Os03g22020;LOC_Os06g35520	5	1155	28	26868	0.00626807
GO:0001944	vasculature development	biological_process	6	LOC_Os11g40840;LOC_Os02g02140;LOC_Os07g12510;LOC_Os04g48850	4	1155	18	26868	0.00641183
GO:0019252	starch biosynthetic process	biological_process	10	LOC_Os05g50380;LOC_Os01g44220;LOC_Os07g22930;LOC_Os10g11140;LOC_Os01g52250	5	1155	29	26868	0.00731066
GO:0008152	metabolic process	biological_process	3	LOC_Os03g38540;LOC_Os03g14370;LOC_Os08g42080;LOC_Os07g41590;LOC_Os08g43430;LOC_Os11g13570;LOC_Os02g02930;LOC_Os09g28630;LOC_Os02g04750;LOC_Os06g11090;LOC_Os09g28230;LOC_Os09g28660;LOC_Os03g15270	13	1155	140	26868	0.00744416
GO:0016420	malonyltransferase activity	molecular_function	7	LOC_Os02g28340;LOC_Os02g28470;LOC_Os07g23150	3	1155	10	26868	0.00757589
GO:0046686	response to cadmium ion	biological_process	7	LOC_Os01g01660;LOC_Os02g09480;LOC_Os03g13300;LOC_Os05g38530;LOC_Os03g29190;LOC_Os04g49370;LOC_Os04g58710;LOC_Os12g24650;LOC_Os04g41960;LOC_Os01g53730;LOC_Os09g31498;LOC_Os11g10510;LOC_Os09g39960;LOC_Os05g44900;LOC_Os02g45930;LOC_Os04g43680;LOC_Os12g37970;LOC_Os01g01650;LOC_Os11g47460;LOC_Os11g47760	20	1155	256	26868	0.00763965
GO:0009809	lignin biosynthetic process	biological_process	8	LOC_Os09g23560;LOC_Os03g22020;LOC_Os06g35520;LOC_Os10g36848;LOC_Os02g14170;LOC_Os04g15920;LOC_Os03g22010;LOC_Os09g31498;LOC_Os09g23530;LOC_Os07g41060;LOC_Os06g35480	11	1155	111	26868	0.00830446
GO:0009407	toxin catabolic process	biological_process	6	LOC_Os09g29200;LOC_Os10g38470;LOC_Os10g38780;LOC_Os10g38540;LOC_Os07g05800;LOC_Os05g34150;LOC_Os10g38700	7	1155	55	26868	0.00893523
GO:0030001	metal ion transport	biological_process	8	LOC_Os04g39320;LOC_Os02g37330;LOC_Os03g22490;LOC_Os09g09830;LOC_Os04g39380;LOC_Os04g49260;LOC_Os04g39350;LOC_Os02g37300;LOC_Os07g48390;LOC_Os04g57200;LOC_Os10g36200	11	1155	113	26868	0.00944753
GO:0046564	oxalate decarboxylase activity	molecular_function	7	LOC_Os08g08970;LOC_Os01g14670;LOC_Os08g09010;LOC_Os03g58980;LOC_Os08g13440;LOC_Os08g35750	6	1155	43	26868	0.00974263
GO:0033609	oxalate metabolic process	biological_process	9	LOC_Os08g35750;LOC_Os01g14670;LOC_Os08g08970;LOC_Os03g58980;LOC_Os08g13440;LOC_Os08g09010	6	1155	43	26868	0.00974263
GO:0009651	response to salt stress	biological_process	6	LOC_Os12g24320;LOC_Os11g37960;LOC_Os11g04530;LOC_Os10g35460;LOC_Os02g42585;LOC_Os06g11860;LOC_Os02g01510;LOC_Os12g03290;LOC_Os11g10510;LOC_Os07g01020;LOC_Os05g27730;LOC_Os02g09480;LOC_Os08g34240;LOC_Os05g31750;LOC_Os04g43680;LOC_Os09g20390;LOC_Os03g20090;LOC_Os03g09170;LOC_Os01g61080;LOC_Os05g31760;LOC_Os04g38900;LOC_Os03g13840;LOC_Os11g17540;LOC_Os11g37950;LOC_Os11g45740	25	1155	351	26868	0.00982767
GO:0050662	coenzyme binding	molecular_function	5	LOC_Os06g44170;LOC_Os04g53860;LOC_Os06g44180;LOC_Os09g31498;LOC_Os04g53850;LOC_Os04g53810;LOC_Os04g53800	7	1155	56	26868	0.00984253
GO:0070370	cellular heat acclimation	biological_process	7	LOC_Os05g27730;LOC_Os11g40840;LOC_Os01g61080	3	1155	11	26868	0.0100871
GO:0009691	cytokinin biosynthetic process	biological_process	7	LOC_Os03g64070;LOC_Os03g01880;LOC_Os09g37540	3	1155	11	26868	0.0100871
GO:0016799	hydrolase activity, hydrolyzing N-glycosyl compounds	molecular_function	6	LOC_Os03g01880;LOC_Os03g64070;LOC_Os09g37540	3	1155	11	26868	0.0100871
GO:0016871	cycloartenol synthase activity	molecular_function	7	LOC_Os06g28820;LOC_Os02g04750;LOC_Os11g18366	3	1155	11	26868	0.0100871
GO:0009873	ethylene-activated signaling pathway	biological_process	7	LOC_Os04g49690;LOC_Os01g46870;LOC_Os10g41330;LOC_Os04g52090;LOC_Os01g14440;LOC_Os06g14406;LOC_Os01g04800;LOC_Os02g42585;LOC_Os09g11480;LOC_Os06g11860;LOC_Os03g09170;LOC_Os12g03290;LOC_Os01g49830;LOC_Os07g12510;LOC_Os11g03540	15	1155	178	26868	0.0101337
GO:0010112	regulation of systemic acquired resistance	biological_process	8	LOC_Os01g09800;LOC_Os11g44680	2	1155	4	26868	0.0104548
GO:0006040	amino sugar metabolic process	biological_process	6	LOC_Os03g30470;LOC_Os10g39680	2	1155	4	26868	0.0104548
GO:0035252	UDP-xylosyltransferase activity	molecular_function	7	LOC_Os03g18820;LOC_Os03g19310	2	1155	4	26868	0.0104548
GO:0008843	endochitinase activity	molecular_function	8	LOC_Os03g30470;LOC_Os10g39680	2	1155	4	26868	0.0104548
GO:0045333	cellular respiration	biological_process	7	LOC_Os11g10510;LOC_Os04g51150	2	1155	4	26868	0.0104548
GO:0051245	negative regulation of cellular defense response	biological_process	9	LOC_Os05g44270;LOC_Os03g46440	2	1155	4	26868	0.0104548
GO:0016231	beta-N-acetylglucosaminidase activity	molecular_function	9	LOC_Os10g39680;LOC_Os03g30470	2	1155	4	26868	0.0104548
GO:1901601	strigolactone biosynthetic process	biological_process	11	LOC_Os01g38580;LOC_Os03g10620	2	1155	4	26868	0.0104548
GO:0008878	glucose-1-phosphate adenylyltransferase activity	molecular_function	8	LOC_Os05g50380;LOC_Os01g44220	2	1155	4	26868	0.0104548
GO:0016829	lyase activity	molecular_function	4	LOC_Os01g36620;LOC_Os11g14400;LOC_Os06g07860;LOC_Os01g45060;LOC_Os06g07960;LOC_Os01g05744;LOC_Os08g44040	7	1155	57	26868	0.0108152
GO:0031225	anchored component of membrane	cellular_component	5	LOC_Os05g41030;LOC_Os07g09970;LOC_Os02g16500;LOC_Os10g05660;LOC_Os03g14050;LOC_Os10g35460;LOC_Os02g20560;LOC_Os05g07060;LOC_Os02g20540;LOC_Os03g57970	10	1155	100	26868	0.0108729
GO:0046323	glucose import	biological_process	12	LOC_Os03g11900;LOC_Os07g01560;LOC_Os04g37980;LOC_Os04g43210;LOC_Os07g37320;LOC_Os12g32940;LOC_Os03g10100;LOC_Os07g39350	8	1155	71	26868	0.0110301
GO:0005355	glucose transmembrane transporter activity	molecular_function	9	LOC_Os07g39350;LOC_Os12g32940;LOC_Os07g37320;LOC_Os07g01560;LOC_Os04g43210;LOC_Os04g37980;LOC_Os03g11900;LOC_Os03g10100	8	1155	71	26868	0.0110301
GO:0042744	hydrogen peroxide catabolic process	biological_process	8	LOC_Os03g03910;LOC_Os10g02070;LOC_Os06g35520;LOC_Os03g22020;LOC_Os03g13210;LOC_Os06g35480;LOC_Os03g22010;LOC_Os02g14170	8	1155	72	26868	0.0119548
GO:0009862	systemic acquired resistance, salicylic acid mediated signaling pathway	biological_process	6	LOC_Os01g09800;LOC_Os05g25770;LOC_Os12g02450	3	1155	12	26868	0.0130247
GO:0003959	NADPH dehydrogenase activity	molecular_function	6	LOC_Os06g11240;LOC_Os01g27230;LOC_Os06g11210	3	1155	12	26868	0.0130247
GO:0030795	jasmonate O-methyltransferase activity	molecular_function	8	LOC_Os06g13560;LOC_Os02g48770;LOC_Os06g20960	3	1155	12	26868	0.0130247
GO:0071456	cellular response to hypoxia	biological_process	6	LOC_Os11g44680;LOC_Os09g29690;LOC_Os09g29710	3	1155	12	26868	0.0130247
GO:0016165	linoleate 13S-lipoxygenase activity	molecular_function	7	LOC_Os02g10120;LOC_Os04g37430;LOC_Os03g52860	3	1155	12	26868	0.0130247
GO:0080163	regulation of protein serine/threonine phosphatase activity	biological_process	12	LOC_Os12g36880;LOC_Os12g36830;LOC_Os12g36850;LOC_Os04g50700	4	1155	22	26868	0.0133767
GO:0006032	chitin catabolic process	biological_process	8	LOC_Os10g28120;LOC_Os06g25010;LOC_Os10g28080;LOC_Os05g15770;LOC_Os01g47070;LOC_Os06g24990	6	1155	46	26868	0.013433
GO:0009737	response to abscisic acid	biological_process	6	LOC_Os01g55690;LOC_Os11g10510;LOC_Os06g48250;LOC_Os05g31750;LOC_Os09g31498;LOC_Os11g02540;LOC_Os03g20090;LOC_Os11g03440;LOC_Os01g21250;LOC_Os02g09480;LOC_Os02g44870;LOC_Os12g24320;LOC_Os03g06360;LOC_Os06g14324;LOC_Os03g11550;LOC_Os04g52090;LOC_Os12g02400;LOC_Os12g02470;LOC_Os03g14370;LOC_Os12g26290;LOC_Os03g58790;LOC_Os02g01510;LOC_Os11g45740;LOC_Os12g03290	24	1155	345	26868	0.0146399
GO:0042542	response to hydrogen peroxide	biological_process	7	LOC_Os09g16510;LOC_Os11g02369;LOC_Os04g40630;LOC_Os12g02330;LOC_Os03g03910;LOC_Os11g10510;LOC_Os05g38530	7	1155	61	26868	0.0154093
GO:0010287	plastoglobule	cellular_component	8	LOC_Os05g48630;LOC_Os01g52240;LOC_Os07g04990;LOC_Os12g24800;LOC_Os09g17740;LOC_Os02g47510;LOC_Os02g10390	7	1155	61	26868	0.0154093
GO:0009864	induced systemic resistance, jasmonic acid mediated signaling pathway	biological_process	6	LOC_Os12g02450;LOC_Os05g25770;LOC_Os01g72020	3	1155	13	26868	0.0163985
GO:0045995	regulation of embryonic development	biological_process	7	LOC_Os12g03040;LOC_Os01g70110	2	1155	5	26868	0.0169299
GO:0080027	response to herbivore	biological_process	7	LOC_Os11g37950;LOC_Os11g37960	2	1155	5	26868	0.0169299
GO:0033843	xyloglucan 6-xylosyltransferase activity	molecular_function	8	LOC_Os03g19310;LOC_Os03g18820	2	1155	5	26868	0.0169299
GO:0019374	galactolipid metabolic process	biological_process	9	LOC_Os07g05110;LOC_Os12g41720	2	1155	5	26868	0.0169299
GO:0010411	xyloglucan metabolic process	biological_process	9	LOC_Os04g51460;LOC_Os11g33270;LOC_Os09g23220;LOC_Os03g19310;LOC_Os03g18820	5	1155	36	26868	0.0181402
GO:0010427	abscisic acid binding	molecular_function	6	LOC_Os12g36850;LOC_Os12g36830;LOC_Os12g36880;LOC_Os04g50700	4	1155	24	26868	0.0181591
GO:0004864	protein phosphatase inhibitor activity	molecular_function	7	LOC_Os04g50700;LOC_Os12g36880;LOC_Os12g36850;LOC_Os12g36830	4	1155	24	26868	0.0181591
GO:0003825	alpha,alpha-trehalose-phosphate synthase (UDP-forming) activity	molecular_function	8	LOC_Os08g31980;LOC_Os02g54820;LOC_Os08g34580	3	1155	14	26868	0.0202148
GO:0072488	ammonium transmembrane transport	biological_process	9	LOC_Os04g43070;LOC_Os02g34580;LOC_Os03g62200	3	1155	14	26868	0.0202148
GO:0008519	ammonium transmembrane transporter activity	molecular_function	7	LOC_Os04g43070;LOC_Os02g34580;LOC_Os03g62200	3	1155	14	26868	0.0202148
GO:0015695	organic cation transport	biological_process	8	LOC_Os03g62200;LOC_Os02g34580;LOC_Os04g43070	3	1155	14	26868	0.0202148
GO:0047617	acyl-CoA hydrolase activity	molecular_function	8	LOC_Os12g41720;LOC_Os02g32200;LOC_Os07g05110	3	1155	14	26868	0.0202148
GO:0019740	nitrogen utilization	biological_process	3	LOC_Os02g34580;LOC_Os03g62200;LOC_Os04g43070	3	1155	14	26868	0.0202148
GO:0000038	very long-chain fatty acid metabolic process	biological_process	10	LOC_Os09g34930;LOC_Os05g49290;LOC_Os06g15170	3	1155	14	26868	0.0202148
GO:0010183	pollen tube guidance	biological_process	4	LOC_Os03g29190;LOC_Os10g33040;LOC_Os03g17700;LOC_Os02g02140	4	1155	25	26868	0.0209001
GO:0009695	jasmonic acid biosynthetic process	biological_process	10	LOC_Os02g48770;LOC_Os06g13560;LOC_Os06g11240;LOC_Os04g37430;LOC_Os06g20960	5	1155	38	26868	0.0225205
GO:0009408	response to heat	biological_process	5	LOC_Os01g09800;LOC_Os02g32590;LOC_Os05g38530;LOC_Os09g31498;LOC_Os04g31040;LOC_Os01g61080;LOC_Os11g47760;LOC_Os05g27730;LOC_Os05g31750;LOC_Os03g15960;LOC_Os04g01740;LOC_Os05g31760	12	1155	145	26868	0.0227762
GO:0010154	fruit development	biological_process	6	LOC_Os09g23220;LOC_Os01g51634;LOC_Os04g45330;LOC_Os12g24320	4	1155	26	26868	0.0238813
GO:0010334	sesquiterpene synthase activity	molecular_function	8	LOC_Os04g01810;LOC_Os04g27430;LOC_Os04g27190;LOC_Os04g27670	4	1155	26	26868	0.0238813
GO:0050734	hydroxycinnamoyltransferase activity	molecular_function	7	LOC_Os11g07960;LOC_Os11g31090	2	1155	6	26868	0.0246762
GO:0052325	cell wall pectin biosynthetic process	biological_process	9	LOC_Os11g07960;LOC_Os11g31090	2	1155	6	26868	0.0246762
GO:0009741	response to brassinosteroid	biological_process	6	LOC_Os04g49690;LOC_Os02g45710;LOC_Os04g51460;LOC_Os03g03280;LOC_Os02g52010	5	1155	39	26868	0.024946
GO:0003677	DNA binding	molecular_function	6	LOC_Os06g06480;LOC_Os03g17100;LOC_Os06g06460;LOC_Os09g16510;LOC_Os01g60020;LOC_Os03g04070;LOC_Os07g38170;LOC_Os02g49840;LOC_Os02g09830;LOC_Os11g03300;LOC_Os06g51070;LOC_Os11g47460;LOC_Os01g15640;LOC_Os12g03290;LOC_Os03g44540;LOC_Os10g41330;LOC_Os01g49830;LOC_Os05g03760;LOC_Os11g03540;LOC_Os01g50940;LOC_Os06g45890;LOC_Os02g40530;LOC_Os03g49170;LOC_Os09g29960;LOC_Os07g06470;LOC_Os05g45410;LOC_Os08g…	77	1155	1432	26868	0.0254775
GO:0009617	response to bacterium	biological_process	7	LOC_Os12g03150;LOC_Os01g09800;LOC_Os05g38530;LOC_Os03g17700;LOC_Os09g36580;LOC_Os03g23010;LOC_Os11g44680	7	1155	68	26868	0.0265158
GO:0031966	mitochondrial membrane	cellular_component	5	LOC_Os02g35610;LOC_Os12g24320;LOC_Os08g43190;LOC_Os01g48570;LOC_Os08g01120	5	1155	41	26868	0.030284
GO:0004805	trehalose-phosphatase activity	molecular_function	9	LOC_Os08g31980;LOC_Os02g54820;LOC_Os09g20390;LOC_Os08g34580	4	1155	28	26868	0.03058
GO:0043231	intracellular membrane-bounded organelle	cellular_component	5	LOC_Os06g18790;LOC_Os04g44240;LOC_Os11g25720;LOC_Os01g49230;LOC_Os01g08440;LOC_Os02g14680;LOC_Os05g37250;LOC_Os04g46940;LOC_Os04g28520;LOC_Os01g63930;LOC_Os04g25440;LOC_Os04g42690;LOC_Os07g13770;LOC_Os01g53330;LOC_Os07g32620;LOC_Os04g46980;LOC_Os12g37510;LOC_Os06g39330;LOC_Os05g45180;LOC_Os07g30620;LOC_Os06g09240;LOC_Os07g32010;LOC_Os04g57350;LOC_Os01g53460;LOC_Os06g18010;LOC_Os01g64540	26	1155	411	26868	0.0328811
GO:0004834	tryptophan synthase activity	molecular_function	7	LOC_Os03g58290;LOC_Os03g58300	2	1155	7	26868	0.0335729
GO:0010508	positive regulation of autophagy	biological_process	9	LOC_Os05g27730;LOC_Os01g61080	2	1155	7	26868	0.0335729
GO:0016114	terpenoid biosynthetic process	biological_process	9	LOC_Os07g09190;LOC_Os02g02930	2	1155	7	26868	0.0335729
GO:0080086	stamen filament development	biological_process	5	LOC_Os09g23220;LOC_Os04g37430	2	1155	7	26868	0.0335729
GO:0045053	protein retention in Golgi apparatus	biological_process	7	LOC_Os08g02354;LOC_Os02g27130	2	1155	7	26868	0.0335729
GO:0010226	response to lithium ion	biological_process	7	LOC_Os03g06360;LOC_Os06g50950	2	1155	7	26868	0.0335729
GO:0009228	thiamine biosynthetic process	biological_process	8	LOC_Os07g34570;LOC_Os07g09190	2	1155	7	26868	0.0335729
GO:0009682	induced systemic resistance	biological_process	9	LOC_Os01g09800;LOC_Os09g36580	2	1155	7	26868	0.0335729
GO:0031409	pigment binding	molecular_function	4	LOC_Os02g10390;LOC_Os01g52240;LOC_Os09g17740	3	1155	17	26868	0.0343296
GO:0080167	response to karrikin	biological_process	5	LOC_Os12g36870;LOC_Os12g38640;LOC_Os03g60509;LOC_Os04g43800;LOC_Os05g35290;LOC_Os07g33660;LOC_Os04g24140;LOC_Os12g44110	8	1155	88	26868	0.0355009
GO:0009416	response to light stimulus	biological_process	6	LOC_Os01g52240;LOC_Os06g15170;LOC_Os02g11070;LOC_Os03g60080;LOC_Os07g40290;LOC_Os04g40100;LOC_Os02g39710;LOC_Os02g10390;LOC_Os09g17740;LOC_Os03g09170;LOC_Os06g11860;LOC_Os01g21250;LOC_Os06g44450;LOC_Os01g19740;LOC_Os11g03440	15	1155	208	26868	0.0355914
GO:0052696	flavonoid glucuronidation	biological_process	6	LOC_Os04g25440;LOC_Os07g32010;LOC_Os05g45180;LOC_Os04g42690;LOC_Os06g39330;LOC_Os12g37510;LOC_Os01g53460;LOC_Os06g18790;LOC_Os06g18010;LOC_Os01g53330;LOC_Os07g30620;LOC_Os07g13770;LOC_Os02g14680;LOC_Os11g25720;LOC_Os04g46980;LOC_Os01g08440;LOC_Os07g32620;LOC_Os01g49230;LOC_Os04g44240;LOC_Os01g64540;LOC_Os06g09240	21	1155	319	26868	0.0358864
GO:0006355	regulation of transcription, DNA-templated	biological_process	8	LOC_Os05g45410;LOC_Os08g10080;LOC_Os02g32590;LOC_Os03g09170;LOC_Os04g21950;LOC_Os10g41330;LOC_Os09g25060;LOC_Os09g11480;LOC_Os10g02584;LOC_Os11g29870;LOC_Os02g48320;LOC_Os01g50940;LOC_Os07g48550;LOC_Os06g45890;LOC_Os01g64360;LOC_Os02g09830;LOC_Os11g13930;LOC_Os12g42400;LOC_Os02g42585;LOC_Os12g37970;LOC_Os03g04070;LOC_Os01g04800;LOC_Os02g49840;LOC_Os03g49170;LOC_Os05g27730;LOC_Os11g03540;LOC_Os03g…	85	1155	1627	26868	0.0359434
GO:0005544	calcium-dependent phospholipid binding	molecular_function	6	LOC_Os05g31750;LOC_Os01g62430;LOC_Os05g31760;LOC_Os05g30970	4	1155	30	26868	0.0382777
GO:0005351	carbohydrate:proton symporter activity	molecular_function	7	LOC_Os07g01560;LOC_Os03g11900;LOC_Os03g10100;LOC_Os04g37980;LOC_Os04g43210;LOC_Os07g39350;LOC_Os12g32940;LOC_Os07g37320	8	1155	90	26868	0.0397782
GO:0009694	jasmonic acid metabolic process	biological_process	9	LOC_Os06g20960;LOC_Os02g48770;LOC_Os06g13560	3	1155	18	26868	0.0399132
GO:0016602	CCAAT-binding factor complex	cellular_component	7	LOC_Os07g06470;LOC_Os03g44540;LOC_Os12g42400	3	1155	18	26868	0.0399132
GO:0009768	photosynthesis, light harvesting in photosystem I	biological_process	7	LOC_Os01g52240;LOC_Os09g17740;LOC_Os02g10390	3	1155	18	26868	0.0399132
GO:0051762	sesquiterpene biosynthetic process	biological_process	10	LOC_Os04g01810;LOC_Os04g27670;LOC_Os04g27190	3	1155	18	26868	0.0399132
GO:0016788	hydrolase activity, acting on ester bonds	molecular_function	5	LOC_Os01g11750;LOC_Os07g42250;LOC_Os06g50950;LOC_Os01g11730;LOC_Os02g57110;LOC_Os08g02094;LOC_Os10g39710;LOC_Os02g32200;LOC_Os02g09610;LOC_Os01g11620;LOC_Os10g32580;LOC_Os01g61200	12	1155	159	26868	0.0420576
GO:0051646	mitochondrion localization	biological_process	6	LOC_Os01g51634	1	1155	1	26868	0.0429879
GO:0050691	regulation of defense response to virus by host	biological_process	8	LOC_Os09g25060	1	1155	1	26868	0.0429879
GO:0009671	nitrate:proton symporter activity	molecular_function	11	LOC_Os12g25200	1	1155	1	26868	0.0429879
GO:0014902	myotube differentiation	biological_process	8	LOC_Os01g05744	1	1155	1	26868	0.0429879
GO:0019285	glycine betaine biosynthetic process from choline	biological_process	8	LOC_Os06g48510	1	1155	1	26868	0.0429879
GO:0060151	peroxisome localization	biological_process	6	LOC_Os01g51634	1	1155	1	26868	0.0429879
GO:0019133	choline monooxygenase activity	molecular_function	7	LOC_Os06g48510	1	1155	1	26868	0.0429879
GO:0016708	oxidoreductase activity, acting on paired donors, with incorporation or reduction of molecular oxygen, NAD(P)H as one donor, and incorporation of two atoms of oxygen into one donor	molecular_function	6	LOC_Os06g48510	1	1155	1	26868	0.0429879
GO:0006878	cellular copper ion homeostasis	biological_process	12	LOC_Os05g11320	1	1155	1	26868	0.0429879
GO:0034614	cellular response to reactive oxygen species	biological_process	7	LOC_Os12g26290	1	1155	1	26868	0.0429879
GO:0034622	cellular protein-containing complex assembly	biological_process	7	LOC_Os01g05744	1	1155	1	26868	0.0429879
GO:0033644	host cell membrane	cellular_component	5	LOC_Os02g03840	1	1155	1	26868	0.0429879
GO:0018131	oxazole or thiazole biosynthetic process	biological_process	7	LOC_Os07g34570	1	1155	1	26868	0.0429879
GO:0019458	methionine catabolic process via 2-oxobutanoate	biological_process	12	LOC_Os10g37340	1	1155	1	26868	0.0429879
GO:0010288	response to lead ion	biological_process	7	LOC_Os03g14000	1	1155	1	26868	0.0429879
GO:0006824	cobalt ion transport	biological_process	10	LOC_Os06g36450	1	1155	1	26868	0.0429879
GO:0046789	host cell surface receptor binding	molecular_function	5	LOC_Os02g03840	1	1155	1	26868	0.0429879
GO:0033611	oxalate catabolic process	biological_process	10	LOC_Os04g58710	1	1155	1	26868	0.0429879
GO:0010055	atrichoblast differentiation	biological_process	8	LOC_Os11g29870	1	1155	1	26868	0.0429879
GO:0015087	cobalt ion transmembrane transporter activity	molecular_function	10	LOC_Os06g36450	1	1155	1	26868	0.0429879
GO:0000169	activation of MAPK activity involved in osmosensory signaling pathway	biological_process	14	LOC_Os03g17700	1	1155	1	26868	0.0429879
GO:0015927	trehalase activity	molecular_function	7	LOC_Os09g20390	1	1155	1	26868	0.0429879
GO:0032780	negative regulation of ATPase activity	biological_process	8	LOC_Os02g33070	1	1155	1	26868	0.0429879
GO:0046109	uridine biosynthetic process	biological_process	12	LOC_Os04g24140	1	1155	1	26868	0.0429879
GO:0046622	positive regulation of organ growth	biological_process	8	LOC_Os04g36670	1	1155	1	26868	0.0429879
GO:0046848	hydroxyapatite binding	molecular_function	4	LOC_Os01g05744	1	1155	1	26868	0.0429879
GO:0035444	nickel cation transmembrane transport	biological_process	11	LOC_Os06g36450	1	1155	1	26868	0.0429879
GO:0034007	S-linalool synthase activity	molecular_function	7	LOC_Os02g02930	1	1155	1	26868	0.0429879
GO:0032440	2-alkenal reductase [NAD(P)] activity	molecular_function	7	LOC_Os04g41960	1	1155	1	26868	0.0429879
GO:0042907	xanthine transmembrane transporter activity	molecular_function	7	LOC_Os12g31860	1	1155	1	26868	0.0429879
GO:0020036	Maurer's cleft	cellular_component	7	LOC_Os02g03840	1	1155	1	26868	0.0429879
GO:0010811	positive regulation of cell-substrate adhesion	biological_process	7	LOC_Os01g05744	1	1155	1	26868	0.0429879
GO:0009765	photosynthesis, light harvesting	biological_process	6	LOC_Os04g54630	1	1155	1	26868	0.0429879
GO:0051645	Golgi localization	biological_process	6	LOC_Os01g51634	1	1155	1	26868	0.0429879
GO:0033840	NDP-glucose-starch glucosyltransferase activity	molecular_function	8	LOC_Os07g22930	1	1155	1	26868	0.0429879
GO:0046081	dUTP catabolic process	biological_process	12	LOC_Os03g46640	1	1155	1	26868	0.0429879
GO:0005212	structural constituent of eye lens	molecular_function	4	LOC_Os10g38930	1	1155	1	26868	0.0429879
GO:0009687	abscisic acid metabolic process	biological_process	10	LOC_Os02g47470	1	1155	1	26868	0.0429879
GO:0004170	dUTP diphosphatase activity	molecular_function	9	LOC_Os03g46640	1	1155	1	26868	0.0429879
GO:0001561	fatty acid alpha-oxidation	biological_process	11	LOC_Os12g26290	1	1155	1	26868	0.0429879
GO:0090602	sieve element enucleation	biological_process	7	LOC_Os01g15640	1	1155	1	26868	0.0429879
GO:0050203	oxalate-CoA ligase activity	molecular_function	7	LOC_Os04g58710	1	1155	1	26868	0.0429879
GO:0000041	transition metal ion transport	biological_process	9	LOC_Os06g36450	1	1155	1	26868	0.0429879
GO:0006226	dUMP biosynthetic process	biological_process	12	LOC_Os03g46640	1	1155	1	26868	0.0429879
GO:0019439	aromatic compound catabolic process	biological_process	6	LOC_Os06g48510	1	1155	1	26868	0.0429879
GO:0010028	xanthophyll cycle	biological_process	12	LOC_Os04g31040	1	1155	1	26868	0.0429879
GO:0042906	xanthine transport	biological_process	9	LOC_Os12g31860	1	1155	1	26868	0.0429879
GO:0071529	cementum mineralization	biological_process	8	LOC_Os01g05744	1	1155	1	26868	0.0429879
GO:0046422	violaxanthin de-epoxidase activity	molecular_function	5	LOC_Os04g31040	1	1155	1	26868	0.0429879
GO:0018826	methionine gamma-lyase activity	molecular_function	6	LOC_Os10g37340	1	1155	1	26868	0.0429879
GO:0055068	cobalt ion homeostasis	biological_process	11	LOC_Os06g36450	1	1155	1	26868	0.0429879
GO:2000045	regulation of G1/S transition of mitotic cell cycle	biological_process	9	LOC_Os01g05744	1	1155	1	26868	0.0429879
GO:0032107	regulation of response to nutrient levels	biological_process	8	LOC_Os11g29870	1	1155	1	26868	0.0429879
GO:0032791	lead ion binding	molecular_function	7	LOC_Os03g14000	1	1155	1	26868	0.0429879
GO:0071901	negative regulation of protein serine/threonine kinase activity	biological_process	12	LOC_Os03g01740	1	1155	1	26868	0.0429879
GO:0000024	maltose biosynthetic process	biological_process	9	LOC_Os10g41550	1	1155	1	26868	0.0429879
GO:0009986	cell surface	cellular_component	4	LOC_Os05g31750;LOC_Os05g31760	2	1155	8	26868	0.0435067
GO:0048317	seed morphogenesis	biological_process	5	LOC_Os12g03040;LOC_Os01g70110	2	1155	8	26868	0.0435067
GO:0031640	killing of cells of other organism	biological_process	4	LOC_Os11g37950;LOC_Os11g37960	2	1155	8	26868	0.0435067
GO:0045723	positive regulation of fatty acid biosynthetic process	biological_process	9	LOC_Os11g03540;LOC_Os12g03290	2	1155	8	26868	0.0435067
GO:0045549	9-cis-epoxycarotenoid dioxygenase activity	molecular_function	8	LOC_Os08g28240;LOC_Os03g44380	2	1155	8	26868	0.0435067
GO:0010199	organ boundary specification between lateral organs and the meristem	biological_process	7	LOC_Os01g11600;LOC_Os06g14406	2	1155	8	26868	0.0435067
GO:1901959	positive regulation of cutin biosynthetic process	biological_process	9	LOC_Os11g03540;LOC_Os12g03290	2	1155	8	26868	0.0435067
GO:0042761	very long-chain fatty acid biosynthetic process	biological_process	11	LOC_Os12g03150;LOC_Os06g19530;LOC_Os01g05744	3	1155	19	26868	0.0459252
GO:0019199	transmembrane receptor protein kinase activity	molecular_function	8	LOC_Os11g40840;LOC_Os08g14940;LOC_Os11g31540	3	1155	19	26868	0.0459252
GO:0080044	quercetin 7-O-glucosyltransferase activity	molecular_function	8	LOC_Os01g53460;LOC_Os01g08440;LOC_Os01g53330;LOC_Os06g18790;LOC_Os07g32620;LOC_Os04g44240;LOC_Os05g45180;LOC_Os06g39330;LOC_Os12g37510;LOC_Os02g14680;LOC_Os06g09240;LOC_Os07g13770;LOC_Os06g18010;LOC_Os07g30620;LOC_Os07g32010;LOC_Os11g25720;LOC_Os01g64540;LOC_Os04g25440;LOC_Os01g49230	19	1155	290	26868	0.0460379
GO:0080043	quercetin 3-O-glucosyltransferase activity	molecular_function	8	LOC_Os06g09240;LOC_Os07g32010;LOC_Os04g25440;LOC_Os01g08440;LOC_Os07g32620;LOC_Os07g30620;LOC_Os06g18790;LOC_Os01g53330;LOC_Os04g44240;LOC_Os07g13770;LOC_Os01g49230;LOC_Os06g18010;LOC_Os02g14680;LOC_Os01g53460;LOC_Os06g39330;LOC_Os01g64540;LOC_Os12g37510;LOC_Os05g45180;LOC_Os11g25720	19	1155	290	26868	0.0460379
GO:0015079	potassium ion transmembrane transporter activity	molecular_function	9	LOC_Os03g37840;LOC_Os01g70490;LOC_Os04g32920;LOC_Os09g27580	4	1155	32	26868	0.0469834
GO:0005992	trehalose biosynthetic process	biological_process	9	LOC_Os08g34580;LOC_Os02g54820;LOC_Os09g20390;LOC_Os08g31980	4	1155	32	26868	0.0469834
GO:0016168	chlorophyll binding	molecular_function	6	LOC_Os01g52240;LOC_Os04g54630;LOC_Os09g17740;LOC_Os02g10390	4	1155	32	26868	0.0469834
GO:0016874	ligase activity	molecular_function	4	LOC_Os02g34410;LOC_Os11g34080;LOC_Os06g06490;LOC_Os03g01140;LOC_Os09g39620;LOC_Os10g40490;LOC_Os04g34140;LOC_Os09g39650;LOC_Os03g03790;LOC_Os02g52210	10	1155	129	26868	0.0517172
GO:0009819	drought recovery	biological_process	6	LOC_Os04g43800;LOC_Os05g35290;LOC_Os06g14324	3	1155	20	26868	0.0523562
GO:0009901	anther dehiscence	biological_process	6	LOC_Os02g03030;LOC_Os03g59330;LOC_Os04g37430	3	1155	20	26868	0.0523562
GO:0016709	oxidoreductase activity, acting on paired donors, with incorporation or reduction of molecular oxygen, NAD(P)H as one donor, and incorporation of one atom of oxygen	molecular_function	6	LOC_Os08g39694;LOC_Os10g36848;LOC_Os02g01890;LOC_Os09g10340;LOC_Os02g47470;LOC_Os10g36980;LOC_Os11g41680;LOC_Os02g30780;LOC_Os01g36294;LOC_Os09g36080;LOC_Os03g63310;LOC_Os01g27890;LOC_Os06g46680;LOC_Os03g25150;LOC_Os10g36960	15	1155	220	26868	0.0534243
GO:0042626	ATPase-coupled transmembrane transporter activity	molecular_function	8	LOC_Os01g50080;LOC_Os11g37700;LOC_Os08g05690;LOC_Os01g42410;LOC_Os01g42380;LOC_Os08g43120;LOC_Os09g29660;LOC_Os01g50100;LOC_Os01g42370;LOC_Os08g29570	10	1155	130	26868	0.0539722
GO:0009507	chloroplast	cellular_component	7	LOC_Os07g05365;LOC_Os05g31750;LOC_Os01g61680;LOC_Os04g54630;LOC_Os09g20390;LOC_Os12g24650;LOC_Os01g29330;LOC_Os02g40700;LOC_Os04g28990;LOC_Os10g38930;LOC_Os06g48510;LOC_Os03g32490;LOC_Os02g56970;LOC_Os05g41190;LOC_Os02g51710;LOC_Os06g14324;LOC_Os04g31040;LOC_Os07g04990;LOC_Os08g01120;LOC_Os08g42080;LOC_Os01g21250;LOC_Os05g31760;LOC_Os01g38580;LOC_Os01g62060;LOC_Os06g19530;LOC_Os05g03030;LOC_Os06g…	119	1155	2398	26868	0.0541115
GO:0019898	extrinsic component of membrane	cellular_component	4	LOC_Os02g27130;LOC_Os01g70820;LOC_Os09g23690;LOC_Os05g07710;LOC_Os08g02354	5	1155	48	26868	0.0543061
GO:1901928	cadinene biosynthetic process	biological_process	11	LOC_Os04g27190;LOC_Os04g27340	2	1155	9	26868	0.0543724
GO:0015994	chlorophyll metabolic process	biological_process	8	LOC_Os07g01020;LOC_Os04g31040	2	1155	9	26868	0.0543724
GO:0010440	stomatal lineage progression	biological_process	5	LOC_Os09g29100;LOC_Os02g49840	2	1155	9	26868	0.0543724
GO:0018685	alkane 1-monooxygenase activity	molecular_function	7	LOC_Os05g37250;LOC_Os01g63930	2	1155	9	26868	0.0543724
GO:0047274	galactinol-sucrose galactosyltransferase activity	molecular_function	8	LOC_Os01g07530;LOC_Os12g36870	2	1155	9	26868	0.0543724
GO:0003954	NADH dehydrogenase activity	molecular_function	6	LOC_Os08g04630;LOC_Os07g37730	2	1155	9	26868	0.0543724
GO:0047461	(+)-delta-cadinene synthase activity	molecular_function	9	LOC_Os04g27190;LOC_Os04g27340	2	1155	9	26868	0.0543724
GO:0004332	fructose-bisphosphate aldolase activity	molecular_function	7	LOC_Os08g02700;LOC_Os12g07210	2	1155	9	26868	0.0543724
GO:0006869	lipid transport	biological_process	7	LOC_Os05g41030;LOC_Os03g57970;LOC_Os10g36170;LOC_Os07g09970;LOC_Os03g14000;LOC_Os04g46830;LOC_Os04g55159	7	1155	80	26868	0.0562766
GO:0030170	pyridoxal phosphate binding	molecular_function	6	LOC_Os06g07860;LOC_Os04g52440;LOC_Os03g58290;LOC_Os06g36880;LOC_Os03g58300;LOC_Os06g07960;LOC_Os03g13300;LOC_Os04g48850;LOC_Os10g37340	9	1155	114	26868	0.0572436
GO:0000790	nuclear chromatin	cellular_component	7	LOC_Os03g17100;LOC_Os08g33100;LOC_Os01g31800	3	1155	21	26868	0.0591951
GO:0043565	sequence-specific DNA binding	molecular_function	7	LOC_Os09g16510;LOC_Os01g60640;LOC_Os11g44680;LOC_Os09g25060;LOC_Os05g46020;LOC_Os05g27730;LOC_Os03g27080;LOC_Os07g02800;LOC_Os02g32590;LOC_Os12g02450;LOC_Os05g45410;LOC_Os04g21950;LOC_Os01g14440;LOC_Os01g54600;LOC_Os09g28200;LOC_Os10g41230;LOC_Os04g52090;LOC_Os05g25770;LOC_Os07g40780;LOC_Os06g11860;LOC_Os03g09170;LOC_Os03g55540;LOC_Os02g09830;LOC_Os01g61080;LOC_Os02g45760	25	1155	417	26868	0.0601425
GO:0016042	lipid catabolic process	biological_process	6	LOC_Os02g09610;LOC_Os08g02094;LOC_Os05g32380;LOC_Os01g11730;LOC_Os01g61200;LOC_Os02g43700;LOC_Os10g32580;LOC_Os12g41720;LOC_Os06g50950;LOC_Os01g11620;LOC_Os07g05110;LOC_Os02g57110;LOC_Os01g11750	13	1155	187	26868	0.0607744
GO:0005737	cytoplasm	cellular_component	5	LOC_Os06g39390;LOC_Os11g10990;LOC_Os01g07370;LOC_Os04g50760;LOC_Os02g01355;LOC_Os10g38780;LOC_Os03g53360;LOC_Os03g31180;LOC_Os08g32610;LOC_Os08g02700;LOC_Os01g13280;LOC_Os03g43440;LOC_Os01g72020;LOC_Os01g63690;LOC_Os09g20390;LOC_Os02g06640;LOC_Os04g53720;LOC_Os02g01510;LOC_Os04g36670;LOC_Os04g01660;LOC_Os04g58710;LOC_Os11g26390;LOC_Os06g39470;LOC_Os04g41280;LOC_Os03g13210;LOC_Os12g36830;LOC_Os02g…	163	1155	3380	26868	0.061023
GO:0007568	aging	biological_process	4	LOC_Os09g25760;LOC_Os04g51460;LOC_Os03g18770;LOC_Os02g06640	4	1155	35	26868	0.0619219
GO:0016887	ATPase activity	molecular_function	9	LOC_Os04g01740;LOC_Os06g14406;LOC_Os06g48250;LOC_Os12g28710;LOC_Os10g31864;LOC_Os04g32560;LOC_Os08g15170;LOC_Os02g39650;LOC_Os03g58790;LOC_Os12g24320;LOC_Os01g15540	11	1155	152	26868	0.0639086
GO:0000304	response to singlet oxygen	biological_process	7	LOC_Os03g58790;LOC_Os06g48250	2	1155	10	26868	0.0660715
GO:0046274	lignin catabolic process	biological_process	8	LOC_Os04g43800;LOC_Os05g35290	2	1155	10	26868	0.0660715
GO:0009625	response to insect	biological_process	7	LOC_Os01g21250;LOC_Os01g09800	2	1155	10	26868	0.0660715
GO:0009800	cinnamic acid biosynthetic process	biological_process	8	LOC_Os05g35290;LOC_Os04g43800	2	1155	10	26868	0.0660715
GO:0045595	regulation of cell differentiation	biological_process	6	LOC_Os06g11860;LOC_Os03g09170	2	1155	10	26868	0.0660715
GO:0019253	reductive pentose-phosphate cycle	biological_process	8	LOC_Os04g38600;LOC_Os01g19740	2	1155	10	26868	0.0660715
GO:0046244	salicylic acid catabolic process	biological_process	8	LOC_Os04g43800;LOC_Os05g35290	2	1155	10	26868	0.0660715
GO:0004373	glycogen (starch) synthase activity	molecular_function	8	LOC_Os07g22930;LOC_Os01g52250	2	1155	10	26868	0.0660715
GO:0004540	ribonuclease activity	molecular_function	7	LOC_Os11g37950;LOC_Os11g37960	2	1155	10	26868	0.0660715
GO:0045548	phenylalanine ammonia-lyase activity	molecular_function	7	LOC_Os05g35290;LOC_Os04g43800	2	1155	10	26868	0.0660715
GO:0048527	lateral root development	biological_process	8	LOC_Os08g10080;LOC_Os04g38900;LOC_Os11g29870	3	1155	22	26868	0.0664296
GO:0010345	suberin biosynthetic process	biological_process	8	LOC_Os11g07960;LOC_Os04g28520;LOC_Os11g31090	3	1155	22	26868	0.0664296
GO:0009867	jasmonic acid mediated signaling pathway	biological_process	6	LOC_Os01g47760;LOC_Os05g46020;LOC_Os06g13560;LOC_Os02g48770;LOC_Os06g20960	5	1155	51	26868	0.0672039
GO:0044550	secondary metabolite biosynthetic process	biological_process	5	LOC_Os08g39694;LOC_Os03g63310;LOC_Os03g25150;LOC_Os01g27890;LOC_Os10g36960;LOC_Os06g46680;LOC_Os03g05920;LOC_Os09g10340;LOC_Os01g36294;LOC_Os02g01890;LOC_Os11g41680;LOC_Os10g36980;LOC_Os02g30780;LOC_Os09g36080;LOC_Os03g05900	15	1155	229	26868	0.0703063
GO:0016125	sterol metabolic process	biological_process	7	LOC_Os02g47470;LOC_Os08g36860;LOC_Os03g55800;LOC_Os07g30950;LOC_Os03g12500	5	1155	52	26868	0.0718494
GO:0004674	protein serine/threonine kinase activity	molecular_function	8	LOC_Os11g03820;LOC_Os04g34270;LOC_Os07g35410;LOC_Os12g02200;LOC_Os07g35260;LOC_Os11g02240;LOC_Os04g56430;LOC_Os07g29330;LOC_Os03g56160;LOC_Os07g35004;LOC_Os01g70970;LOC_Os03g43440;LOC_Os07g39520;LOC_Os12g43440;LOC_Os08g24310;LOC_Os04g30010;LOC_Os07g35290;LOC_Os09g39650;LOC_Os11g05320;LOC_Os09g24330;LOC_Os11g39420;LOC_Os06g50100;LOC_Os07g04040;LOC_Os01g26280;LOC_Os11g07225;LOC_Os05g47770;LOC_Os03g…	74	1155	1453	26868	0.0736383
GO:0090332	stomatal closure	biological_process	5	LOC_Os05g30970;LOC_Os11g47760;LOC_Os07g48500	3	1155	23	26868	0.074046
GO:0009735	response to cytokinin	biological_process	6	LOC_Os07g05365;LOC_Os03g17070;LOC_Os05g48630;LOC_Os11g04720;LOC_Os04g58710;LOC_Os03g50560;LOC_Os04g32560;LOC_Os08g42080;LOC_Os04g15920	9	1155	121	26868	0.0770886
GO:0009688	abscisic acid biosynthetic process	biological_process	11	LOC_Os08g28240;LOC_Os03g44380	2	1155	11	26868	0.0785125
GO:0034485	phosphatidylinositol-3,4,5-trisphosphate 5-phosphatase activity	molecular_function	10	LOC_Os09g23140;LOC_Os01g08780	2	1155	11	26868	0.0785125
GO:0033617	mitochondrial respiratory chain complex IV assembly	biological_process	10	LOC_Os12g02040;LOC_Os11g02080	2	1155	11	26868	0.0785125
GO:0006725	cellular aromatic compound metabolic process	biological_process	5	LOC_Os01g65690	1	1155	2	26868	0.0841295
GO:0071731	response to nitric oxide	biological_process	7	LOC_Os04g38900	1	1155	2	26868	0.0841295
GO:0034005	germacrene-A synthase activity	molecular_function	9	LOC_Os04g27190	1	1155	2	26868	0.0841295
GO:0004459	L-lactate dehydrogenase activity	molecular_function	7	LOC_Os02g01510	1	1155	2	26868	0.0841295
GO:0005253	anion channel activity	molecular_function	7	LOC_Os12g25200	1	1155	2	26868	0.0841295
GO:0047100	glyceraldehyde-3-phosphate dehydrogenase (NADP+) (phosphorylating) activity	molecular_function	8	LOC_Os04g38600	1	1155	2	26868	0.0841295
GO:0003991	acetylglutamate kinase activity	molecular_function	7	LOC_Os02g44000	1	1155	2	26868	0.0841295
GO:0010104	regulation of ethylene-activated signaling pathway	biological_process	10	LOC_Os06g14406	1	1155	2	26868	0.0841295
GO:0042030	ATPase inhibitor activity	molecular_function	6	LOC_Os02g33070	1	1155	2	26868	0.0841295
GO:0030366	molybdopterin synthase activity	molecular_function	7	LOC_Os02g35200	1	1155	2	26868	0.0841295
GO:0009970	cellular response to sulfate starvation	biological_process	9	LOC_Os10g37340	1	1155	2	26868	0.0841295
GO:0004614	phosphoglucomutase activity	molecular_function	7	LOC_Os10g11140	1	1155	2	26868	0.0841295
GO:0080023	3R-hydroxyacyl-CoA dehydratase activity	molecular_function	7	LOC_Os01g05744	1	1155	2	26868	0.0841295
GO:0033528	S-methylmethionine cycle	biological_process	7	LOC_Os10g28630	1	1155	2	26868	0.0841295
GO:0043620	regulation of DNA-templated transcription in response to stress	biological_process	9	LOC_Os11g29870	1	1155	2	26868	0.0841295
GO:0005275	amine transmembrane transporter activity	molecular_function	5	LOC_Os03g14915	1	1155	2	26868	0.0841295
GO:0009697	salicylic acid biosynthetic process	biological_process	8	LOC_Os11g44680	1	1155	2	26868	0.0841295
GO:0034618	arginine binding	molecular_function	8	LOC_Os02g44000	1	1155	2	26868	0.0841295
GO:0034440	lipid oxidation	biological_process	8	LOC_Os04g37430	1	1155	2	26868	0.0841295
GO:2000037	regulation of stomatal complex patterning	biological_process	7	LOC_Os03g17700	1	1155	2	26868	0.0841295
GO:0019725	cellular homeostasis	biological_process	4	LOC_Os05g30970	1	1155	2	26868	0.0841295
GO:0004457	lactate dehydrogenase activity	molecular_function	6	LOC_Os02g01510	1	1155	2	26868	0.0841295
GO:0050736	O-malonyltransferase activity	molecular_function	8	LOC_Os02g28170	1	1155	2	26868	0.0841295
GO:0051640	organelle localization	biological_process	5	LOC_Os06g29350	1	1155	2	26868	0.0841295
GO:0048530	fruit morphogenesis	biological_process	5	LOC_Os01g11600	1	1155	2	26868	0.0841295
GO:0019388	galactose catabolic process	biological_process	9	LOC_Os10g11140	1	1155	2	26868	0.0841295
GO:0045263	proton-transporting ATP synthase complex, coupling factor F(o)	cellular_component	6	LOC_Os03g17070	1	1155	2	26868	0.0841295
GO:0047974	guanosine deaminase activity	molecular_function	7	LOC_Os07g14150	1	1155	2	26868	0.0841295
GO:0000389	mRNA 3'-splice site recognition	biological_process	10	LOC_Os02g14780	1	1155	2	26868	0.0841295
GO:0031304	intrinsic component of mitochondrial inner membrane	cellular_component	7	LOC_Os07g37730	1	1155	2	26868	0.0841295
GO:0010295	(+)-abscisic acid 8'-hydroxylase activity	molecular_function	7	LOC_Os08g36860	1	1155	2	26868	0.0841295
GO:0052793	pectin acetylesterase activity	molecular_function	7	LOC_Os10g40290	1	1155	2	26868	0.0841295
GO:0052865	1-deoxy-D-xylulose 5-phosphate biosynthetic process	biological_process	8	LOC_Os07g09190	1	1155	2	26868	0.0841295
GO:0080136	priming of cellular response to stress	biological_process	7	LOC_Os03g17700	1	1155	2	26868	0.0841295
GO:0080169	cellular response to boron-containing substance deprivation	biological_process	9	LOC_Os01g14440	1	1155	2	26868	0.0841295
GO:0048500	signal recognition particle	cellular_component	6	LOC_Os05g43390	1	1155	2	26868	0.0841295
GO:0071669	plant-type cell wall organization or biogenesis	biological_process	5	LOC_Os04g51460	1	1155	2	26868	0.0841295
GO:0046030	inositol trisphosphate phosphatase activity	molecular_function	9	LOC_Os01g08780	1	1155	2	26868	0.0841295
GO:0016122	xanthophyll metabolic process	biological_process	11	LOC_Os04g31040	1	1155	2	26868	0.0841295
GO:0009615	response to virus	biological_process	7	LOC_Os11g37950;LOC_Os11g37960;LOC_Os11g47760;LOC_Os05g38530	4	1155	39	26868	0.0852447
GO:0042803	protein homodimerization activity	molecular_function	6	LOC_Os02g49840;LOC_Os07g01020;LOC_Os02g45750;LOC_Os02g09830;LOC_Os11g35930;LOC_Os11g10510;LOC_Os04g58280;LOC_Os11g13930;LOC_Os07g34570;LOC_Os05g45410	10	1155	143	26868	0.0892356
GO:0009791	post-embryonic development	biological_process	4	LOC_Os01g51634;LOC_Os03g03280;LOC_Os04g49690	3	1155	25	26868	0.0903657
GO:0022900	electron transport chain	biological_process	6	LOC_Os02g35610;LOC_Os01g64120	2	1155	12	26868	0.0916101
GO:0043621	protein self-association	molecular_function	5	LOC_Os02g48320;LOC_Os03g04110;LOC_Os12g43640;LOC_Os09g28480	4	1155	40	26868	0.0916571
GO:0005773	vacuole	cellular_component	6	LOC_Os05g31760;LOC_Os05g18604;LOC_Os09g39960;LOC_Os03g19990;LOC_Os03g28980;LOC_Os03g48626;LOC_Os04g38900;LOC_Os01g19820;LOC_Os02g06640;LOC_Os01g68500;LOC_Os04g28990;LOC_Os01g11230;LOC_Os04g20164;LOC_Os04g30420;LOC_Os02g51710;LOC_Os04g02910;LOC_Os05g29920;LOC_Os05g28740;LOC_Os08g01120;LOC_Os02g57720;LOC_Os03g19270;LOC_Os03g09070;LOC_Os12g24650;LOC_Os11g18366	24	1155	418	26868	0.093268
GO:0040008	regulation of growth	biological_process	5	LOC_Os11g31950;LOC_Os12g03290;LOC_Os12g41720;LOC_Os07g05110	4	1155	41	26868	0.0982921
GO:1901657	glycosyl compound metabolic process	biological_process	6	LOC_Os04g39814;LOC_Os11g45710;LOC_Os04g39864;LOC_Os09g31430	4	1155	41	26868	0.0982921
GO:0009736	cytokinin-activated signaling pathway	biological_process	6	LOC_Os06g11860;LOC_Os01g46870;LOC_Os05g09410;LOC_Os03g09170	4	1155	41	26868	0.0982921
GO:0034605	cellular response to heat	biological_process	6	LOC_Os01g61080;LOC_Os05g27730;LOC_Os01g19740	3	1155	26	26868	0.0990376
GO:0015706	nitrate transport	biological_process	9	LOC_Os01g65169;LOC_Os08g05910;LOC_Os05g35650	3	1155	26	26868	0.0990376
GO:0009664	plant-type cell wall organization	biological_process	7	LOC_Os11g40840;LOC_Os01g73200;LOC_Os04g59260;LOC_Os03g21820;LOC_Os03g36560;LOC_Os01g57730;LOC_Os04g59150;LOC_Os08g02110;LOC_Os01g22249;LOC_Os04g59190	10	1155	147	26868	0.102345
GO:0080060	integument development	biological_process	5	LOC_Os12g03040;LOC_Os01g70110	2	1155	13	26868	0.105285
GO:0006644	phospholipid metabolic process	biological_process	7	LOC_Os07g05110;LOC_Os12g41720	2	1155	13	26868	0.105285
GO:0002237	response to molecule of bacterial origin	biological_process	6	LOC_Os09g25060;LOC_Os11g44680	2	1155	13	26868	0.105285
GO:0046740	transport of virus in host, cell to cell	biological_process	8	LOC_Os05g46030;LOC_Os01g51632	2	1155	13	26868	0.105285
GO:0005887	integral component of plasma membrane	cellular_component	6	LOC_Os03g05620;LOC_Os02g57720;LOC_Os10g30790;LOC_Os04g43210;LOC_Os04g46940;LOC_Os05g40000;LOC_Os07g39350;LOC_Os02g34580;LOC_Os01g54700;LOC_Os03g10100;LOC_Os04g35540;LOC_Os02g30910;LOC_Os12g32940;LOC_Os07g01560;LOC_Os07g37320;LOC_Os01g11160;LOC_Os01g50460;LOC_Os03g11900;LOC_Os03g62200;LOC_Os04g37980;LOC_Os04g43070	21	1155	364	26868	0.106615
GO:0009944	polarity specification of adaxial/abaxial axis	biological_process	6	LOC_Os11g40840;LOC_Os04g45330;LOC_Os01g72020	3	1155	27	26868	0.108029
GO:0009739	response to gibberellin	biological_process	6	LOC_Os11g47460;LOC_Os02g09480;LOC_Os12g37970;LOC_Os02g01355;LOC_Os12g03150;LOC_Os04g51460	6	1155	76	26868	0.108361
GO:0042538	hyperosmotic salinity response	biological_process	7	LOC_Os03g44380;LOC_Os07g01020;LOC_Os04g57350;LOC_Os06g50950;LOC_Os08g34240	5	1155	59	26868	0.109059
GO:0010089	xylem development	biological_process	7	LOC_Os03g22010;LOC_Os06g35520;LOC_Os06g35480;LOC_Os02g14170;LOC_Os03g22020	5	1155	59	26868	0.109059
GO:0046982	protein heterodimerization activity	molecular_function	6	LOC_Os06g06480;LOC_Os07g01020;LOC_Os02g09830;LOC_Os11g05730;LOC_Os06g06460;LOC_Os04g49420;LOC_Os01g61920	7	1155	95	26868	0.114614
GO:0060548	negative regulation of cell death	biological_process	7	LOC_Os05g30970;LOC_Os05g34270	2	1155	14	26868	0.119463
GO:0006863	purine nucleobase transport	biological_process	8	LOC_Os04g49757;LOC_Os04g49739	2	1155	14	26868	0.119463
GO:1990135	flavonoid sulfotransferase activity	molecular_function	7	LOC_Os11g26390;LOC_Os11g04530	2	1155	14	26868	0.119463
GO:0006541	glutamine metabolic process	biological_process	11	LOC_Os04g58280;LOC_Os05g35580	2	1155	14	26868	0.119463
GO:0006873	cellular ion homeostasis	biological_process	8	LOC_Os05g13320;LOC_Os03g06360	2	1155	14	26868	0.119463
GO:0047714	galactolipase activity	molecular_function	7	LOC_Os05g32380;LOC_Os02g43700	2	1155	14	26868	0.119463
GO:0005345	purine nucleobase transmembrane transporter activity	molecular_function	6	LOC_Os04g49757;LOC_Os04g49739	2	1155	14	26868	0.119463
GO:0016131	brassinosteroid metabolic process	biological_process	8	LOC_Os06g39880;LOC_Os11g04530	2	1155	14	26868	0.119463
GO:0004650	polygalacturonase activity	molecular_function	7	LOC_Os10g26940;LOC_Os03g59330;LOC_Os01g45060;LOC_Os11g14400	4	1155	44	26868	0.119472
GO:2000369	regulation of clathrin-dependent endocytosis	biological_process	9	LOC_Os09g23140	1	1155	3	26868	0.123504
GO:1902609	(R)-2-hydroxy-alpha-linolenic acid biosynthetic process	biological_process	12	LOC_Os12g26290	1	1155	3	26868	0.123504
GO:0004788	thiamine diphosphokinase activity	molecular_function	7	LOC_Os05g30454	1	1155	3	26868	0.123504
GO:0045787	positive regulation of cell cycle	biological_process	7	LOC_Os08g38220	1	1155	3	26868	0.123504
GO:0046976	histone methyltransferase activity (H3-K27 specific)	molecular_function	10	LOC_Os02g03030	1	1155	3	26868	0.123504
GO:0090449	phloem glucosinolate loading	biological_process	9	LOC_Os12g44110	1	1155	3	26868	0.123504
GO:0090391	granum assembly	biological_process	6	LOC_Os07g33660	1	1155	3	26868	0.123504
GO:1901349	glucosinolate transport	biological_process	9	LOC_Os12g44110	1	1155	3	26868	0.123504
GO:0015857	uracil transport	biological_process	9	LOC_Os12g31860	1	1155	3	26868	0.123504
GO:0016701	oxidoreductase activity, acting on single donors with incorporation of molecular oxygen	molecular_function	5	LOC_Os01g65690	1	1155	3	26868	0.123504
GO:0015099	nickel cation transmembrane transporter activity	molecular_function	10	LOC_Os06g36450	1	1155	3	26868	0.123504
GO:0009413	response to flooding	biological_process	5	LOC_Os11g10510	1	1155	3	26868	0.123504
GO:0034602	oxoglutarate dehydrogenase (NAD+) activity	molecular_function	7	LOC_Os01g22520	1	1155	3	26868	0.123504
GO:0019008	molybdopterin synthase complex	cellular_component	4	LOC_Os02g35200	1	1155	3	26868	0.123504
GO:0044391	ribosomal subunit	cellular_component	6	LOC_Os02g09590	1	1155	3	26868	0.123504
GO:0050266	rosmarinate synthase activity	molecular_function	7	LOC_Os09g25460	1	1155	3	26868	0.123504
GO:0016166	phytoene dehydrogenase activity	molecular_function	6	LOC_Os08g39850	1	1155	3	26868	0.123504
GO:0090603	sieve element differentiation	biological_process	6	LOC_Os01g15640	1	1155	3	26868	0.123504
GO:0016838	carbon-oxygen lyase activity, acting on phosphates	molecular_function	6	LOC_Os04g01810	1	1155	3	26868	0.123504
GO:0004615	phosphomannomutase activity	molecular_function	7	LOC_Os06g28194	1	1155	3	26868	0.123504
GO:0004096	catalase activity	molecular_function	5	LOC_Os03g03910	1	1155	3	26868	0.123504
GO:0000379	tRNA-type intron splice site recognition and cleavage	biological_process	10	LOC_Os11g38930	1	1155	3	26868	0.123504
GO:0009916	alternative oxidase activity	molecular_function	7	LOC_Os04g51150	1	1155	3	26868	0.123504
GO:0018315	molybdenum incorporation into molybdenum-molybdopterin complex	biological_process	10	LOC_Os02g35200	1	1155	3	26868	0.123504
GO:0031000	response to caffeine	biological_process	6	LOC_Os11g10510	1	1155	3	26868	0.123504
GO:0019760	glucosinolate metabolic process	biological_process	8	LOC_Os02g08270	1	1155	3	26868	0.123504
GO:0015505	uracil:cation symporter activity	molecular_function	8	LOC_Os12g31860	1	1155	3	26868	0.123504
GO:0010186	positive regulation of cellular defense response	biological_process	9	LOC_Os05g30970	1	1155	3	26868	0.123504
GO:0008661	1-deoxy-D-xylulose-5-phosphate synthase activity	molecular_function	6	LOC_Os07g09190	1	1155	3	26868	0.123504
GO:0008275	gamma-tubulin small complex	cellular_component	5	LOC_Os09g27370	1	1155	3	26868	0.123504
GO:0008442	3-hydroxyisobutyrate dehydrogenase activity	molecular_function	7	LOC_Os01g53910	1	1155	3	26868	0.123504
GO:0000214	tRNA-intron endonuclease complex	cellular_component	6	LOC_Os11g38930	1	1155	3	26868	0.123504
GO:0052747	sinapyl alcohol dehydrogenase activity	molecular_function	7	LOC_Os04g15920	1	1155	3	26868	0.123504
GO:0048838	release of seed from dormancy	biological_process	6	LOC_Os03g16170	1	1155	3	26868	0.123504
GO:0032355	response to estradiol	biological_process	6	LOC_Os11g10510	1	1155	3	26868	0.123504
GO:2000027	regulation of animal organ morphogenesis	biological_process	7	LOC_Os11g40840	1	1155	3	26868	0.123504
GO:0004044	amidophosphoribosyltransferase activity	molecular_function	7	LOC_Os05g35580	1	1155	3	26868	0.123504
GO:0010148	transpiration	biological_process	8	LOC_Os11g40840	1	1155	3	26868	0.123504
GO:0009569	chloroplast starch grain	cellular_component	8	LOC_Os07g22930	1	1155	3	26868	0.123504
GO:0010159	specification of animal organ position	biological_process	6	LOC_Os04g45330	1	1155	3	26868	0.123504
GO:0010434	bract formation	biological_process	6	LOC_Os01g72020	1	1155	3	26868	0.123504
GO:0031930	mitochondria-nucleus signaling pathway	biological_process	5	LOC_Os04g51150	1	1155	3	26868	0.123504
GO:0005542	folic acid binding	molecular_function	5	LOC_Os03g38540	1	1155	3	26868	0.123504
GO:1900039	positive regulation of cellular response to hypoxia	biological_process	7	LOC_Os11g10510	1	1155	3	26868	0.123504
GO:0043100	pyrimidine nucleobase salvage	biological_process	9	LOC_Os12g31860	1	1155	3	26868	0.123504
GO:0005274	allantoin:proton symporter activity	molecular_function	11	LOC_Os12g31860	1	1155	3	26868	0.123504
GO:0004751	ribose-5-phosphate isomerase activity	molecular_function	7	LOC_Os04g24140	1	1155	3	26868	0.123504
GO:0071368	cellular response to cytokinin stimulus	biological_process	7	LOC_Os04g36670	1	1155	3	26868	0.123504
GO:0046184	aldehyde biosynthetic process	biological_process	6	LOC_Os09g25850	1	1155	3	26868	0.123504
GO:0015696	ammonium transport	biological_process	8	LOC_Os04g43070	1	1155	3	26868	0.123504
GO:0000213	tRNA-intron endonuclease activity	molecular_function	9	LOC_Os11g38930	1	1155	3	26868	0.123504
GO:0015720	allantoin transport	biological_process	7	LOC_Os12g31860	1	1155	3	26868	0.123504
GO:0007229	integrin-mediated signaling pathway	biological_process	6	LOC_Os01g66860	1	1155	3	26868	0.123504
GO:1902039	negative regulation of seed dormancy process	biological_process	11	LOC_Os03g16170	1	1155	3	26868	0.123504
GO:0080153	negative regulation of reductive pentose-phosphate cycle	biological_process	8	LOC_Os01g19740	1	1155	3	26868	0.123504
GO:0090448	glucosinolate:proton symporter activity	molecular_function	8	LOC_Os12g44110	1	1155	3	26868	0.123504
GO:0016119	carotene metabolic process	biological_process	9	LOC_Os03g03370	1	1155	3	26868	0.123504
GO:0080142	regulation of salicylic acid biosynthetic process	biological_process	9	LOC_Os11g44680	1	1155	3	26868	0.123504
GO:0034595	phosphatidylinositol phosphate 5-phosphatase activity	molecular_function	9	LOC_Os09g23140	1	1155	3	26868	0.123504
GO:0010254	nectary development	biological_process	5	LOC_Os01g72020	1	1155	3	26868	0.123504
GO:0015675	nickel cation transport	biological_process	10	LOC_Os06g36450	1	1155	3	26868	0.123504
GO:0051213	dioxygenase activity	molecular_function	5	LOC_Os03g03034;LOC_Os10g39140;LOC_Os08g37456;LOC_Os04g49210;LOC_Os01g65690;LOC_Os04g49194;LOC_Os04g44150;LOC_Os08g32160	8	1155	116	26868	0.126882
GO:0007338	single fertilization	biological_process	5	LOC_Os07g23120;LOC_Os04g49690	2	1155	15	26868	0.134077
GO:0016762	xyloglucan:xyloglucosyl transferase activity	molecular_function	8	LOC_Os04g51460;LOC_Os09g23220;LOC_Os11g33270	3	1155	30	26868	0.136749
GO:0044212	transcription regulatory region DNA binding	molecular_function	7	LOC_Os04g52090;LOC_Os12g43950;LOC_Os12g03040;LOC_Os03g55540;LOC_Os01g14440;LOC_Os07g12510;LOC_Os07g40780;LOC_Os08g38220;LOC_Os01g70110;LOC_Os09g29960;LOC_Os02g49440	11	1155	176	26868	0.138041
GO:0007166	cell surface receptor signaling pathway	biological_process	5	LOC_Os04g30010;LOC_Os05g47770;LOC_Os01g26280;LOC_Os02g02120;LOC_Os04g30250;LOC_Os01g04570;LOC_Os04g30240;LOC_Os04g58890;LOC_Os02g56380;LOC_Os08g28710;LOC_Os11g44560;LOC_Os09g30454	12	1155	196	26868	0.139515
GO:0009626	plant-type hypersensitive response	biological_process	6	LOC_Os12g26290;LOC_Os08g14940;LOC_Os08g42700;LOC_Os11g12320;LOC_Os06g48520;LOC_Os03g17700;LOC_Os01g09800;LOC_Os12g03150	8	1155	119	26868	0.140686
GO:0001666	response to hypoxia	biological_process	5	LOC_Os01g09800;LOC_Os12g03150;LOC_Os11g10510;LOC_Os03g14000	4	1155	47	26868	0.142423
GO:0006631	fatty acid metabolic process	biological_process	9	LOC_Os03g03790;LOC_Os04g31040;LOC_Os03g01140;LOC_Os01g05744	4	1155	47	26868	0.142423
GO:0008289	lipid binding	molecular_function	4	LOC_Os04g02910;LOC_Os03g57970;LOC_Os07g09970;LOC_Os10g36170;LOC_Os05g41030;LOC_Os03g14000;LOC_Os04g46830;LOC_Os04g55159	8	1155	120	26868	0.145447
GO:0009738	abscisic acid-activated signaling pathway	biological_process	6	LOC_Os01g08780;LOC_Os12g36880;LOC_Os02g03410;LOC_Os12g36850;LOC_Os03g48270;LOC_Os03g17700;LOC_Os04g42451;LOC_Os02g09480;LOC_Os04g50700;LOC_Os12g36830;LOC_Os04g49690	11	1155	178	26868	0.14572
GO:0008285	negative regulation of cell population proliferation	biological_process	7	LOC_Os04g38790;LOC_Os03g61500;LOC_Os03g61490	3	1155	31	26868	0.146847
GO:0006006	glucose metabolic process	biological_process	8	LOC_Os04g38600;LOC_Os10g11140	2	1155	16	26868	0.149062
GO:2000031	regulation of salicylic acid mediated signaling pathway	biological_process	8	LOC_Os01g09800;LOC_Os02g09480	2	1155	16	26868	0.149062
GO:0015293	symporter activity	molecular_function	7	LOC_Os01g37590;LOC_Os08g05910	2	1155	16	26868	0.149062
GO:0016798	hydrolase activity, acting on glycosyl bonds	molecular_function	5	LOC_Os12g10850;LOC_Os09g23220;LOC_Os04g51460;LOC_Os11g33270	4	1155	48	26868	0.150434
GO:0009644	response to high light intensity	biological_process	8	LOC_Os03g23010;LOC_Os05g38530;LOC_Os04g37430;LOC_Os03g13840	4	1155	48	26868	0.150434
GO:0006855	drug transmembrane transport	biological_process	7	LOC_Os10g20470;LOC_Os04g48290;LOC_Os10g25487;LOC_Os03g08900;LOC_Os04g30490	5	1155	66	26868	0.153822
GO:0048767	root hair elongation	biological_process	6	LOC_Os03g18820;LOC_Os03g19310;LOC_Os01g51634	3	1155	32	26868	0.157178
GO:0009969	xyloglucan biosynthetic process	biological_process	10	LOC_Os03g18820;LOC_Os03g19310;LOC_Os02g25630	3	1155	32	26868	0.157178
GO:0006342	chromatin silencing	biological_process	5	LOC_Os08g33100;LOC_Os01g31800;LOC_Os03g17100	3	1155	32	26868	0.157178
GO:0010450	inflorescence meristem growth	biological_process	5	LOC_Os04g45330	1	1155	4	26868	0.161187
GO:0019166	trans-2-enoyl-CoA reductase (NADPH) activity	molecular_function	7	LOC_Os11g06590	1	1155	4	26868	0.161187
GO:0019745	pentacyclic triterpenoid biosynthetic process	biological_process	11	LOC_Os11g18366	1	1155	4	26868	0.161187
GO:0033743	peptide-methionine (R)-S-oxide reductase activity	molecular_function	7	LOC_Os03g04370	1	1155	4	26868	0.161187
GO:0004748	ribonucleoside-diphosphate reductase activity, thioredoxin disulfide as acceptor	molecular_function	8	LOC_Os06g14620	1	1155	4	26868	0.161187
GO:0016462	pyrophosphatase activity	molecular_function	7	LOC_Os05g36260	1	1155	4	26868	0.161187
GO:0006680	glucosylceramide catabolic process	biological_process	12	LOC_Os08g01940	1	1155	4	26868	0.161187
GO:0005267	potassium channel activity	molecular_function	8	LOC_Os03g16170	1	1155	4	26868	0.161187
GO:0009612	response to mechanical stimulus	biological_process	5	LOC_Os04g48850	1	1155	4	26868	0.161187
GO:0052658	inositol-1,4,5-trisphosphate 5-phosphatase activity	molecular_function	10	LOC_Os01g08780	1	1155	4	26868	0.161187
GO:0045339	farnesyl diphosphate catabolic process	biological_process	9	LOC_Os04g01810	1	1155	4	26868	0.161187
GO:0010333	terpene synthase activity	molecular_function	7	LOC_Os02g02930	1	1155	4	26868	0.161187
GO:0016121	carotene catabolic process	biological_process	10	LOC_Os01g38580	1	1155	4	26868	0.161187
GO:0009835	fruit ripening	biological_process	5	LOC_Os04g48850	1	1155	4	26868	0.161187
GO:0010686	tetracyclic triterpenoid biosynthetic process	biological_process	11	LOC_Os06g28820	1	1155	4	26868	0.161187
GO:0009930	longitudinal side of cell surface	cellular_component	4	LOC_Os10g35460	1	1155	4	26868	0.161187
GO:0005971	ribonucleoside-diphosphate reductase complex	cellular_component	7	LOC_Os06g14620	1	1155	4	26868	0.161187
GO:0009954	proximal/distal pattern formation	biological_process	6	LOC_Os01g72020	1	1155	4	26868	0.161187
GO:0004861	cyclin-dependent protein serine/threonine kinase inhibitor activity	molecular_function	8	LOC_Os03g01740	1	1155	4	26868	0.161187
GO:0009263	deoxyribonucleotide biosynthetic process	biological_process	10	LOC_Os06g14620	1	1155	4	26868	0.161187
GO:0032957	inositol trisphosphate metabolic process	biological_process	8	LOC_Os01g08780	1	1155	4	26868	0.161187
GO:0070734	histone H3-K27 methylation	biological_process	13	LOC_Os02g03030	1	1155	4	26868	0.161187
GO:0004348	glucosylceramidase activity	molecular_function	7	LOC_Os08g01940	1	1155	4	26868	0.161187
GO:0006275	regulation of DNA replication	biological_process	9	LOC_Os02g03030	1	1155	4	26868	0.161187
GO:0006617	SRP-dependent cotranslational protein targeting to membrane, signal sequence recognition	biological_process	8	LOC_Os05g43390	1	1155	4	26868	0.161187
GO:0009955	adaxial/abaxial pattern specification	biological_process	6	LOC_Os03g52320	1	1155	4	26868	0.161187
GO:2000038	regulation of stomatal complex development	biological_process	8	LOC_Os03g17700	1	1155	4	26868	0.161187
GO:0016616	oxidoreductase activity, acting on the CH-OH group of donors, NAD or NADP as acceptor	molecular_function	6	LOC_Os04g01660	1	1155	4	26868	0.161187
GO:0006865	amino acid transport	biological_process	10	LOC_Os03g14915	1	1155	4	26868	0.161187
GO:0071732	cellular response to nitric oxide	biological_process	8	LOC_Os12g26290	1	1155	4	26868	0.161187
GO:0052659	inositol-1,3,4,5-tetrakisphosphate 5-phosphatase activity	molecular_function	10	LOC_Os01g08780	1	1155	4	26868	0.161187
GO:0061062	regulation of nematode larval development	biological_process	8	LOC_Os03g47140	1	1155	4	26868	0.161187
GO:0044283	small molecule biosynthetic process	biological_process	5	LOC_Os01g53720	1	1155	4	26868	0.161187
GO:0009538	photosystem I reaction center	cellular_component	6	LOC_Os05g48630	1	1155	4	26868	0.161187
GO:0030307	positive regulation of cell growth	biological_process	7	LOC_Os04g36670	1	1155	4	26868	0.161187
GO:0008898	S-adenosylmethionine-homocysteine S-methyltransferase activity	molecular_function	8	LOC_Os10g28630	1	1155	4	26868	0.161187
GO:0042406	extrinsic component of endoplasmic reticulum membrane	cellular_component	6	LOC_Os03g60509	1	1155	4	26868	0.161187
GO:0032456	endocytic recycling	biological_process	8	LOC_Os04g57350	1	1155	4	26868	0.161187
GO:0009817	defense response to fungus, incompatible interaction	biological_process	7	LOC_Os11g37960;LOC_Os11g37950	2	1155	17	26868	0.164359
GO:0015116	sulfate transmembrane transporter activity	molecular_function	8	LOC_Os08g01120;LOC_Os05g40000	2	1155	17	26868	0.164359
GO:0010187	negative regulation of seed germination	biological_process	10	LOC_Os12g03290;LOC_Os11g47760	2	1155	17	26868	0.164359
GO:0009523	photosystem II	cellular_component	7	LOC_Os04g54630;LOC_Os07g05365	2	1155	17	26868	0.164359
GO:0045338	farnesyl diphosphate metabolic process	biological_process	8	LOC_Os04g27670;LOC_Os04g27190	2	1155	17	26868	0.164359
GO:0000162	tryptophan biosynthetic process	biological_process	11	LOC_Os03g58290;LOC_Os03g58300	2	1155	17	26868	0.164359
GO:0006813	potassium ion transport	biological_process	9	LOC_Os10g30070;LOC_Os04g32920	2	1155	17	26868	0.164359
GO:0010268	brassinosteroid homeostasis	biological_process	8	LOC_Os08g36860;LOC_Os06g39880;LOC_Os07g30950;LOC_Os02g47470	4	1155	50	26868	0.166949
GO:0008422	beta-glucosidase activity	molecular_function	8	LOC_Os04g39814;LOC_Os11g45710;LOC_Os04g39864;LOC_Os09g31430	4	1155	51	26868	0.175438
GO:0012505	endomembrane system	cellular_component	4	LOC_Os08g42700;LOC_Os08g01120;LOC_Os07g01020;LOC_Os11g03070;LOC_Os12g02840;LOC_Os02g55060;LOC_Os11g12320;LOC_Os06g07200;LOC_Os06g48520;LOC_Os08g14940	10	1155	166	26868	0.178573
GO:0071577	zinc ion transmembrane transport	biological_process	11	LOC_Os07g12890;LOC_Os03g29850	2	1155	18	26868	0.179915
GO:0010030	positive regulation of seed germination	biological_process	10	LOC_Os04g58710;LOC_Os03g16170	2	1155	18	26868	0.179915
GO:0098542	defense response to other organism	biological_process	6	LOC_Os11g47760;LOC_Os03g63310	2	1155	18	26868	0.179915
GO:0005618	cell wall	cellular_component	5	LOC_Os10g26940;LOC_Os11g47760;LOC_Os03g21820;LOC_Os06g35520;LOC_Os09g39760;LOC_Os07g38130;LOC_Os03g22020;LOC_Os03g22010;LOC_Os03g58980;LOC_Os03g59330;LOC_Os01g28500;LOC_Os08g13440;LOC_Os08g08970;LOC_Os11g35410;LOC_Os10g33140;LOC_Os01g14670;LOC_Os04g32560;LOC_Os11g33270;LOC_Os02g52010;LOC_Os11g35450;LOC_Os04g03810;LOC_Os08g37840;LOC_Os04g51460;LOC_Os08g35750;LOC_Os05g38530;LOC_Os10g40710;LOC_Os09g…	32	1155	632	26868	0.192754
GO:0008134	transcription factor binding	molecular_function	5	LOC_Os02g49840;LOC_Os02g01355	2	1155	19	26868	0.195678
GO:1900056	negative regulation of leaf senescence	biological_process	10	LOC_Os05g25770;LOC_Os12g02450	2	1155	19	26868	0.195678
GO:0010223	secondary shoot formation	biological_process	6	LOC_Os01g38580;LOC_Os03g10620	2	1155	19	26868	0.195678
GO:0006535	cysteine biosynthetic process from serine	biological_process	12	LOC_Os06g36880;LOC_Os01g52260	2	1155	19	26868	0.195678
GO:0042273	ribosomal large subunit biogenesis	biological_process	6	LOC_Os11g05370;LOC_Os01g04730	2	1155	19	26868	0.195678
GO:0010266	response to vitamin B1	biological_process	7	LOC_Os01g28500	1	1155	5	26868	0.197251
GO:0071705	nitrogen compound transport	biological_process	6	LOC_Os12g31860	1	1155	5	26868	0.197251
GO:0016620	oxidoreductase activity, acting on the aldehyde or oxo group of donors, NAD or NADP as acceptor	molecular_function	6	LOC_Os04g38600	1	1155	5	26868	0.197251
GO:0012511	monolayer-surrounded lipid storage body	cellular_component	7	LOC_Os12g26290	1	1155	5	26868	0.197251
GO:0034638	phosphatidylcholine catabolic process	biological_process	10	LOC_Os06g40170	1	1155	5	26868	0.197251
GO:0048211	Golgi vesicle docking	biological_process	7	LOC_Os10g39950	1	1155	5	26868	0.197251
GO:0015098	molybdate ion transmembrane transporter activity	molecular_function	8	LOC_Os08g01120	1	1155	5	26868	0.197251
GO:0043693	monoterpene biosynthetic process	biological_process	10	LOC_Os02g02930	1	1155	5	26868	0.197251
GO:2000070	regulation of response to water deprivation	biological_process	7	LOC_Os02g42585	1	1155	5	26868	0.197251
GO:0006521	regulation of cellular amino acid metabolic process	biological_process	8	LOC_Os08g42080	1	1155	5	26868	0.197251
GO:0016629	12-oxophytodienoate reductase activity	molecular_function	7	LOC_Os06g11240	1	1155	5	26868	0.197251
GO:0052656	L-isoleucine transaminase activity	molecular_function	8	LOC_Os10g40200	1	1155	5	26868	0.197251
GO:0032266	phosphatidylinositol-3-phosphate binding	molecular_function	8	LOC_Os05g07710	1	1155	5	26868	0.197251
GO:0004445	inositol-polyphosphate 5-phosphatase activity	molecular_function	10	LOC_Os01g08780	1	1155	5	26868	0.197251
GO:0052654	L-leucine transaminase activity	molecular_function	8	LOC_Os10g40200	1	1155	5	26868	0.197251
GO:0043044	ATP-dependent chromatin remodeling	biological_process	7	LOC_Os06g14406	1	1155	5	26868	0.197251
GO:0009113	purine nucleobase biosynthetic process	biological_process	10	LOC_Os05g35580	1	1155	5	26868	0.197251
GO:0010270	photosystem II oxygen evolving complex assembly	biological_process	9	LOC_Os07g05365	1	1155	5	26868	0.197251
GO:0008312	7S RNA binding	molecular_function	7	LOC_Os05g43390	1	1155	5	26868	0.197251
GO:0004616	phosphogluconate dehydrogenase (decarboxylating) activity	molecular_function	7	LOC_Os01g53910	1	1155	5	26868	0.197251
GO:0033383	geranyl diphosphate metabolic process	biological_process	8	LOC_Os04g27430	1	1155	5	26868	0.197251
GO:0015689	molybdate ion transport	biological_process	9	LOC_Os08g01120	1	1155	5	26868	0.197251
GO:0015210	uracil transmembrane transporter activity	molecular_function	7	LOC_Os12g31860	1	1155	5	26868	0.197251
GO:0005247	voltage-gated chloride channel activity	molecular_function	9	LOC_Os12g25200	1	1155	5	26868	0.197251
GO:0034484	raffinose catabolic process	biological_process	8	LOC_Os12g36870	1	1155	5	26868	0.197251
GO:0010067	procambium histogenesis	biological_process	7	LOC_Os02g02140	1	1155	5	26868	0.197251
GO:0071454	cellular response to anoxia	biological_process	6	LOC_Os01g19740	1	1155	5	26868	0.197251
GO:0070301	cellular response to hydrogen peroxide	biological_process	8	LOC_Os01g11860	1	1155	5	26868	0.197251
GO:0052655	L-valine transaminase activity	molecular_function	8	LOC_Os10g40200	1	1155	5	26868	0.197251
GO:0071323	cellular response to chitin	biological_process	8	LOC_Os02g45750	1	1155	5	26868	0.197251
GO:0051938	L-glutamate import	biological_process	11	LOC_Os01g11160	1	1155	5	26868	0.197251
GO:0048439	flower morphogenesis	biological_process	5	LOC_Os01g72020	1	1155	5	26868	0.197251
GO:0009052	pentose-phosphate shunt, non-oxidative branch	biological_process	6	LOC_Os04g24140	1	1155	5	26868	0.197251
GO:0030155	regulation of cell adhesion	biological_process	5	LOC_Os11g40840	1	1155	5	26868	0.197251
GO:1903086	negative regulation of sinapate ester biosynthetic process	biological_process	9	LOC_Os01g65370	1	1155	5	26868	0.197251
GO:0009081	branched-chain amino acid metabolic process	biological_process	9	LOC_Os10g40200	1	1155	5	26868	0.197251
GO:0004084	branched-chain-amino-acid transaminase activity	molecular_function	7	LOC_Os10g40200	1	1155	5	26868	0.197251
GO:0046524	sucrose-phosphate synthase activity	molecular_function	8	LOC_Os01g69030	1	1155	5	26868	0.197251
GO:0006777	Mo-molybdopterin cofactor biosynthetic process	biological_process	8	LOC_Os02g35200	1	1155	5	26868	0.197251
GO:0010452	histone H3-K36 methylation	biological_process	13	LOC_Os07g02800	1	1155	5	26868	0.197251
GO:0043447	alkane biosynthetic process	biological_process	6	LOC_Os09g25850	1	1155	5	26868	0.197251
GO:0035556	intracellular signal transduction	biological_process	5	LOC_Os11g05320;LOC_Os12g41090;LOC_Os03g03510;LOC_Os03g43440;LOC_Os07g39520;LOC_Os04g42451;LOC_Os10g34170;LOC_Os03g31180;LOC_Os03g48270;LOC_Os02g03410	10	1155	170	26868	0.197308
GO:0051726	regulation of cell cycle	biological_process	6	LOC_Os07g37010;LOC_Os02g03030;LOC_Os03g41100;LOC_Os09g29100	4	1155	55	26868	0.210747
GO:0006559	L-phenylalanine catabolic process	biological_process	11	LOC_Os05g35290;LOC_Os04g43800	2	1155	20	26868	0.211603
GO:0009654	photosystem II oxygen evolving complex	cellular_component	6	LOC_Os07g05365;LOC_Os01g70820	2	1155	20	26868	0.211603
GO:0033612	receptor serine/threonine kinase binding	molecular_function	6	LOC_Os12g43640;LOC_Os05g34270	2	1155	20	26868	0.211603
GO:0042545	cell wall modification	biological_process	7	LOC_Os09g39760;LOC_Os08g38220	2	1155	20	26868	0.211603
GO:0004620	phospholipase activity	molecular_function	7	LOC_Os12g41720;LOC_Os07g05110	2	1155	20	26868	0.211603
GO:0000326	protein storage vacuole	cellular_component	8	LOC_Os05g12400;LOC_Os01g55690	2	1155	20	26868	0.211603
GO:0009816	defense response to bacterium, incompatible interaction	biological_process	7	LOC_Os11g44680;LOC_Os09g16510;LOC_Os01g63690	3	1155	37	26868	0.211725
GO:0045892	negative regulation of transcription, DNA-templated	biological_process	9	LOC_Os01g65370;LOC_Os01g49830;LOC_Os01g43610;LOC_Os04g52090;LOC_Os12g02450;LOC_Os01g14440;LOC_Os01g64410;LOC_Os05g25770	8	1155	133	26868	0.213951
GO:0051301	cell division	biological_process	4	LOC_Os09g39960;LOC_Os01g51634;LOC_Os04g48850;LOC_Os09g29100;LOC_Os07g12510;LOC_Os08g03620;LOC_Os02g45780;LOC_Os03g41100;LOC_Os04g38900;LOC_Os07g37010	10	1155	175	26868	0.221855
GO:0006857	oligopeptide transport	biological_process	9	LOC_Os05g35650;LOC_Os12g44110;LOC_Os08g05910;LOC_Os04g36040;LOC_Os01g37590;LOC_Os01g65169	6	1155	95	26868	0.224563
GO:0000302	response to reactive oxygen species	biological_process	6	LOC_Os05g45410;LOC_Os01g21250	2	1155	21	26868	0.227646
GO:0003774	motor activity	molecular_function	9	LOC_Os01g51634;LOC_Os06g29350	2	1155	21	26868	0.227646
GO:0046856	phosphatidylinositol dephosphorylation	biological_process	10	LOC_Os09g23140;LOC_Os01g08780	2	1155	21	26868	0.227646
GO:0010227	floral organ abscission	biological_process	5	LOC_Os03g59330;LOC_Os01g72020	2	1155	21	26868	0.227646
GO:0009860	pollen tube growth	biological_process	8	LOC_Os07g41590;LOC_Os06g29350;LOC_Os11g13570;LOC_Os07g23120;LOC_Os03g29190	5	1155	76	26868	0.228251
GO:0016607	nuclear speck	cellular_component	8	LOC_Os02g45930;LOC_Os05g44900;LOC_Os01g53730;LOC_Os04g49370	4	1155	57	26868	0.229099
GO:0000272	polysaccharide catabolic process	biological_process	7	LOC_Os03g22790	1	1155	6	26868	0.231766
GO:0016123	xanthophyll biosynthetic process	biological_process	12	LOC_Os03g03370	1	1155	6	26868	0.231766
GO:0045430	chalcone isomerase activity	molecular_function	6	LOC_Os03g60509	1	1155	6	26868	0.231766
GO:0009590	detection of gravity	biological_process	6	LOC_Os10g11140	1	1155	6	26868	0.231766
GO:0080025	phosphatidylinositol-3,5-bisphosphate binding	molecular_function	9	LOC_Os05g07710	1	1155	6	26868	0.231766
GO:0015292	uniporter activity	molecular_function	7	LOC_Os06g09260	1	1155	6	26868	0.231766
GO:0009001	serine O-acetyltransferase activity	molecular_function	9	LOC_Os01g52260	1	1155	6	26868	0.231766
GO:0048531	beta-1,3-galactosyltransferase activity	molecular_function	8	LOC_Os09g27950	1	1155	6	26868	0.231766
GO:1902183	regulation of shoot apical meristem development	biological_process	7	LOC_Os04g45330	1	1155	6	26868	0.231766
GO:0035493	SNARE complex assembly	biological_process	8	LOC_Os10g39950	1	1155	6	26868	0.231766
GO:0009897	external side of plasma membrane	cellular_component	5	LOC_Os10g35460	1	1155	6	26868	0.231766
GO:0043680	filiform apparatus	cellular_component	6	LOC_Os04g49690	1	1155	6	26868	0.231766
GO:0019172	glyoxalase III activity	molecular_function	7	LOC_Os01g11860	1	1155	6	26868	0.231766
GO:0016328	lateral plasma membrane	cellular_component	5	LOC_Os10g35460	1	1155	6	26868	0.231766
GO:0010190	cytochrome b6f complex assembly	biological_process	9	LOC_Os01g73540	1	1155	6	26868	0.231766
GO:0047134	protein-disulfide reductase activity	molecular_function	7	LOC_Os03g29190	1	1155	6	26868	0.231766
GO:0010335	response to non-ionic osmotic stress	biological_process	6	LOC_Os07g01020	1	1155	6	26868	0.231766
GO:0000146	microfilament motor activity	molecular_function	10	LOC_Os06g29350	1	1155	6	26868	0.231766
GO:0006982	response to lipid hydroperoxide	biological_process	6	LOC_Os07g01020	1	1155	6	26868	0.231766
GO:0002764	immune response-regulating signaling pathway	biological_process	5	LOC_Os08g14940	1	1155	6	26868	0.231766
GO:0004351	glutamate decarboxylase activity	molecular_function	7	LOC_Os03g13300	1	1155	6	26868	0.231766
GO:0010480	microsporocyte differentiation	biological_process	5	LOC_Os12g43640	1	1155	6	26868	0.231766
GO:0005464	UDP-xylose transmembrane transporter activity	molecular_function	8	LOC_Os06g30950	1	1155	6	26868	0.231766
GO:0090575	RNA polymerase II transcription factor complex	cellular_component	6	LOC_Os01g01870	1	1155	6	26868	0.231766
GO:0019752	carboxylic acid metabolic process	biological_process	7	LOC_Os02g01510	1	1155	6	26868	0.231766
GO:0004792	thiosulfate sulfurtransferase activity	molecular_function	7	LOC_Os12g24020	1	1155	6	26868	0.231766
GO:0071446	cellular response to salicylic acid stimulus	biological_process	7	LOC_Os12g26290	1	1155	6	26868	0.231766
GO:0052692	raffinose alpha-galactosidase activity	molecular_function	9	LOC_Os12g36870	1	1155	6	26868	0.231766
GO:0010106	cellular response to iron ion starvation	biological_process	9	LOC_Os06g36450	1	1155	6	26868	0.231766
GO:0042981	regulation of apoptotic process	biological_process	8	LOC_Os04g53720	1	1155	6	26868	0.231766
GO:0030133	transport vesicle	cellular_component	7	LOC_Os01g51634	1	1155	6	26868	0.231766
GO:0043682	copper-transporting ATPase activity	molecular_function	11	LOC_Os04g46940	1	1155	6	26868	0.231766
GO:0009229	thiamine diphosphate biosynthetic process	biological_process	8	LOC_Os05g30454	1	1155	6	26868	0.231766
GO:0006574	valine catabolic process	biological_process	11	LOC_Os01g53910	1	1155	6	26868	0.231766
GO:0034707	chloride channel complex	cellular_component	7	LOC_Os12g25200	1	1155	6	26868	0.231766
GO:0035619	root hair tip	cellular_component	6	LOC_Os01g51634	1	1155	6	26868	0.231766
GO:0016847	1-aminocyclopropane-1-carboxylate synthase activity	molecular_function	6	LOC_Os04g48850	1	1155	6	26868	0.231766
GO:0015790	UDP-xylose transmembrane transport	biological_process	9	LOC_Os06g30950	1	1155	6	26868	0.231766
GO:0006468	protein phosphorylation	biological_process	9	LOC_Os01g70970;LOC_Os12g41090;LOC_Os01g03690;LOC_Os02g45750;LOC_Os11g02240;LOC_Os01g04570;LOC_Os07g03840;LOC_Os12g43440;LOC_Os01g66760;LOC_Os09g24330;LOC_Os07g29330;LOC_Os02g14480;LOC_Os08g14950;LOC_Os09g39620;LOC_Os04g44910;LOC_Os01g04580;LOC_Os07g35310;LOC_Os03g03510;LOC_Os05g44770;LOC_Os02g48210;LOC_Os07g35004;LOC_Os10g33040;LOC_Os01g48570;LOC_Os08g14940;LOC_Os07g35290;LOC_Os04g56430;LOC_Os11g…	58	1155	1222	26868	0.233596
GO:0009788	negative regulation of abscisic acid-activated signaling pathway	biological_process	9	LOC_Os03g16170;LOC_Os01g60020;LOC_Os04g49690	3	1155	39	26868	0.234584
GO:0051537	2 iron, 2 sulfur cluster binding	molecular_function	6	LOC_Os06g48510;LOC_Os01g27140;LOC_Os01g64120	3	1155	39	26868	0.234584
GO:0016020	membrane	cellular_component	3	LOC_Os04g57350;LOC_Os10g36848;LOC_Os03g25150;LOC_Os04g36040;LOC_Os05g44770;LOC_Os09g27580;LOC_Os10g39710;LOC_Os03g37840;LOC_Os09g23690;LOC_Os02g55060;LOC_Os10g40710;LOC_Os07g24230;LOC_Os02g01890;LOC_Os07g42250;LOC_Os03g44580;LOC_Os06g46680;LOC_Os10g33040;LOC_Os01g21520;LOC_Os03g17070;LOC_Os11g47760;LOC_Os04g38900;LOC_Os03g04020;LOC_Os04g55159;LOC_Os05g36260;LOC_Os06g19530;LOC_Os01g16170;LOC_Os01g…	61	1155	1294	26868	0.24354
GO:0005451	monovalent cation:proton antiporter activity	molecular_function	11	LOC_Os12g02840;LOC_Os11g03070	2	1155	22	26868	0.243768
GO:0010025	wax biosynthetic process	biological_process	7	LOC_Os06g15170;LOC_Os09g25850	2	1155	22	26868	0.243768
GO:0016459	myosin complex	cellular_component	4	LOC_Os01g51634;LOC_Os06g29350	2	1155	22	26868	0.243768
GO:0031305	integral component of mitochondrial inner membrane	cellular_component	8	LOC_Os12g02040;LOC_Os11g02080	2	1155	22	26868	0.243768
GO:0032502	developmental process	biological_process	3	LOC_Os03g17200;LOC_Os01g62060	2	1155	22	26868	0.243768
GO:0009744	response to sucrose	biological_process	8	LOC_Os11g10510;LOC_Os01g19740;LOC_Os03g60080	3	1155	40	26868	0.246173
GO:0009555	pollen development	biological_process	6	LOC_Os11g18366;LOC_Os04g37430;LOC_Os04g40630;LOC_Os04g43800;LOC_Os03g17700;LOC_Os05g35290;LOC_Os07g04040;LOC_Os01g54600	8	1155	140	26868	0.255136
GO:0042546	cell wall biogenesis	biological_process	5	LOC_Os11g33270;LOC_Os09g23220;LOC_Os04g51460	3	1155	41	26868	0.257847
GO:0043424	protein histidine kinase binding	molecular_function	8	LOC_Os03g60080;LOC_Os05g09410	2	1155	23	26868	0.259932
GO:0006555	methionine metabolic process	biological_process	10	LOC_Os10g28350	1	1155	7	26868	0.264798
GO:0045040	protein insertion into mitochondrial outer membrane	biological_process	7	LOC_Os02g29400	1	1155	7	26868	0.264798
GO:0045337	farnesyl diphosphate biosynthetic process	biological_process	9	LOC_Os04g56230	1	1155	7	26868	0.264798
GO:0006497	protein lipidation	biological_process	9	LOC_Os05g07710	1	1155	7	26868	0.264798
GO:0006821	chloride transport	biological_process	9	LOC_Os12g25200	1	1155	7	26868	0.264798
GO:0015078	proton transmembrane transporter activity	molecular_function	9	LOC_Os03g17070	1	1155	7	26868	0.264798
GO:0018812	3-hydroxyacyl-CoA dehydratase activity	molecular_function	7	LOC_Os01g05744	1	1155	7	26868	0.264798
GO:0008235	metalloexopeptidase activity	molecular_function	8	LOC_Os12g24650	1	1155	7	26868	0.264798
GO:0019288	isopentenyl diphosphate biosynthetic process, methylerythritol 4-phosphate pathway	biological_process	10	LOC_Os07g09190	1	1155	7	26868	0.264798
GO:0006536	glutamate metabolic process	biological_process	11	LOC_Os03g13300	1	1155	7	26868	0.264798
GO:0030414	peptidase inhibitor activity	molecular_function	6	LOC_Os08g27720	1	1155	7	26868	0.264798
GO:0006829	zinc ion transport	biological_process	10	LOC_Os07g12890	1	1155	7	26868	0.264798
GO:0010103	stomatal complex morphogenesis	biological_process	6	LOC_Os11g40840	1	1155	7	26868	0.264798
GO:0036381	pyridoxal 5'-phosphate synthase (glutamine hydrolysing) activity	molecular_function	7	LOC_Os07g01020	1	1155	7	26868	0.264798
GO:0005432	calcium:sodium antiporter activity	molecular_function	10	LOC_Os10g30070	1	1155	7	26868	0.264798
GO:0043433	negative regulation of DNA-binding transcription factor activity	biological_process	6	LOC_Os05g44270	1	1155	7	26868	0.264798
GO:0043273	CTPase activity	molecular_function	9	LOC_Os11g03270	1	1155	7	26868	0.264798
GO:0004575	sucrose alpha-glucosidase activity	molecular_function	8	LOC_Os01g22900	1	1155	7	26868	0.264798
GO:0071365	cellular response to auxin stimulus	biological_process	7	LOC_Os04g36670	1	1155	7	26868	0.264798
GO:0051289	protein homotetramerization	biological_process	9	LOC_Os10g37340	1	1155	7	26868	0.264798
GO:0031897	Tic complex	cellular_component	8	LOC_Os04g32560	1	1155	7	26868	0.264798
GO:0051920	peroxiredoxin activity	molecular_function	4	LOC_Os02g09940	1	1155	7	26868	0.264798
GO:0071805	potassium ion transmembrane transport	biological_process	10	LOC_Os03g16170	1	1155	7	26868	0.264798
GO:0006826	iron ion transport	biological_process	10	LOC_Os06g36450	1	1155	7	26868	0.264798
GO:0071219	cellular response to molecule of bacterial origin	biological_process	7	LOC_Os11g44680	1	1155	7	26868	0.264798
GO:0090353	polygalacturonase inhibitor activity	molecular_function	6	LOC_Os07g38130	1	1155	7	26868	0.264798
GO:0009939	positive regulation of gibberellic acid mediated signaling pathway	biological_process	9	LOC_Os03g16170	1	1155	7	26868	0.264798
GO:1902584	positive regulation of response to water deprivation	biological_process	7	LOC_Os11g44680	1	1155	7	26868	0.264798
GO:0016301	kinase activity	molecular_function	6	LOC_Os02g10920;LOC_Os08g14940;LOC_Os06g17490;LOC_Os01g04570;LOC_Os08g34240;LOC_Os01g66860;LOC_Os07g45074;LOC_Os03g02190;LOC_Os02g48210;LOC_Os11g07225;LOC_Os06g04920;LOC_Os05g44770;LOC_Os09g39650;LOC_Os10g33040;LOC_Os04g44910;LOC_Os01g53920;LOC_Os04g45730;LOC_Os05g34270;LOC_Os01g04580;LOC_Os03g17700;LOC_Os02g45750;LOC_Os07g03840;LOC_Os07g45070;LOC_Os12g02200;LOC_Os06g50100;LOC_Os01g66760;LOC_Os08g…	39	1155	815	26868	0.266486
GO:0016757	transferase activity, transferring glycosyl groups	molecular_function	5	LOC_Os09g27950;LOC_Os01g02900;LOC_Os07g22930;LOC_Os03g19310;LOC_Os06g27560;LOC_Os03g44580;LOC_Os01g52250;LOC_Os01g69030;LOC_Os03g37010;LOC_Os03g18820;LOC_Os02g54820;LOC_Os12g36870;LOC_Os10g40640;LOC_Os01g72610;LOC_Os02g22160;LOC_Os08g31980;LOC_Os08g34580	17	1155	333	26868	0.267556
GO:0005983	starch catabolic process	biological_process	10	LOC_Os03g04770;LOC_Os10g41550	2	1155	24	26868	0.276105
GO:0009411	response to UV	biological_process	7	LOC_Os08g34790;LOC_Os03g60509	2	1155	24	26868	0.276105
GO:0031348	negative regulation of defense response	biological_process	8	LOC_Os01g09800;LOC_Os05g34270	2	1155	24	26868	0.276105
GO:0005515	protein binding	molecular_function	4	LOC_Os05g44270;LOC_Os04g57350;LOC_Os07g48500;LOC_Os02g02140;LOC_Os02g48320;LOC_Os01g14440;LOC_Os09g28480;LOC_Os01g51634;LOC_Os01g61080;LOC_Os09g16510;LOC_Os06g11860;LOC_Os03g53200;LOC_Os12g02450;LOC_Os04g01740;LOC_Os03g06390;LOC_Os03g14000;LOC_Os06g50930;LOC_Os12g02200;LOC_Os08g14940;LOC_Os08g38220;LOC_Os07g01020;LOC_Os03g09170;LOC_Os01g65370;LOC_Os03g17700;LOC_Os03g19310;LOC_Os09g29100;LOC_Os07g…	103	1155	2259	26868	0.276507
GO:0004364	glutathione transferase activity	molecular_function	6	LOC_Os09g29200;LOC_Os10g38540;LOC_Os07g05800;LOC_Os01g27210;LOC_Os10g38780;LOC_Os10g38470;LOC_Os02g56970;LOC_Os10g38700;LOC_Os05g34150	9	1155	165	26868	0.280038
GO:0009931	calcium-dependent protein serine/threonine kinase activity	molecular_function	9	LOC_Os02g03410;LOC_Os03g48270;LOC_Os04g42451	3	1155	43	26868	0.281398
GO:0004190	aspartic-type endopeptidase activity	molecular_function	8	LOC_Os02g48860;LOC_Os06g03120;LOC_Os09g30414;LOC_Os06g10670;LOC_Os04g45270;LOC_Os01g62630;LOC_Os06g40818;LOC_Os11g08100;LOC_Os02g21040;LOC_Os04g58840;LOC_Os06g03080;LOC_Os07g46480;LOC_Os05g33400;LOC_Os02g48900	14	1155	274	26868	0.291828
GO:0010017	red or far-red light signaling pathway	biological_process	5	LOC_Os03g09170;LOC_Os06g11860	2	1155	25	26868	0.292256
GO:0008970	phospholipase A1 activity	molecular_function	8	LOC_Os05g32380;LOC_Os02g43700	2	1155	25	26868	0.292256
GO:0009532	plastid stroma	cellular_component	7	LOC_Os05g35580;LOC_Os04g32560	2	1155	25	26868	0.292256
GO:0009266	response to temperature stimulus	biological_process	5	LOC_Os07g02800;LOC_Os05g38530	2	1155	25	26868	0.292256
GO:0004683	calmodulin-dependent protein kinase activity	molecular_function	9	LOC_Os02g03410;LOC_Os03g48270;LOC_Os04g42451	3	1155	44	26868	0.293246
GO:0016132	brassinosteroid biosynthetic process	biological_process	9	LOC_Os08g36860;LOC_Os07g30950;LOC_Os02g47470	3	1155	44	26868	0.293246
GO:0019013	viral nucleocapsid	cellular_component	4	LOC_Os06g46390	1	1155	8	26868	0.296411
GO:0071482	cellular response to light stimulus	biological_process	7	LOC_Os07g37730	1	1155	8	26868	0.296411
GO:0006694	steroid biosynthetic process	biological_process	7	LOC_Os02g04750	1	1155	8	26868	0.296411
GO:0070696	transmembrane receptor protein serine/threonine kinase binding	molecular_function	7	LOC_Os04g34140	1	1155	8	26868	0.296411
GO:0004161	dimethylallyltranstransferase activity	molecular_function	7	LOC_Os04g56230	1	1155	8	26868	0.296411
GO:0051415	microtubule nucleation by interphase microtubule organizing center	biological_process	10	LOC_Os09g27370	1	1155	8	26868	0.296411
GO:0030497	fatty acid elongation	biological_process	11	LOC_Os01g05744	1	1155	8	26868	0.296411
GO:0000923	equatorial microtubule organizing center	cellular_component	7	LOC_Os09g27370	1	1155	8	26868	0.296411
GO:0042823	pyridoxal phosphate biosynthetic process	biological_process	8	LOC_Os07g01020	1	1155	8	26868	0.296411
GO:0008615	pyridoxine biosynthetic process	biological_process	7	LOC_Os07g01020	1	1155	8	26868	0.296411
GO:0071492	cellular response to UV-A	biological_process	9	LOC_Os04g54630	1	1155	8	26868	0.296411
GO:0008361	regulation of cell size	biological_process	6	LOC_Os03g60080	1	1155	8	26868	0.296411
GO:0042819	vitamin B6 biosynthetic process	biological_process	8	LOC_Os07g01020	1	1155	8	26868	0.296411
GO:0047036	codeinone reductase (NADPH) activity	molecular_function	7	LOC_Os04g37490	1	1155	8	26868	0.296411
GO:0008794	arsenate reductase (glutaredoxin) activity	molecular_function	6	LOC_Os01g27140	1	1155	8	26868	0.296411
GO:0010389	regulation of G2/M transition of mitotic cell cycle	biological_process	9	LOC_Os01g05744	1	1155	8	26868	0.296411
GO:0090351	seedling development	biological_process	5	LOC_Os01g08780	1	1155	8	26868	0.296411
GO:0034045	phagophore assembly site membrane	cellular_component	6	LOC_Os05g07710	1	1155	8	26868	0.296411
GO:0034755	iron ion transmembrane transport	biological_process	11	LOC_Os06g36450	1	1155	8	26868	0.296411
GO:0006817	phosphate ion transport	biological_process	9	LOC_Os02g56510	1	1155	8	26868	0.296411
GO:0009690	cytokinin metabolic process	biological_process	6	LOC_Os08g37990	1	1155	8	26868	0.296411
GO:0006796	phosphate-containing compound metabolic process	biological_process	6	LOC_Os05g36260	1	1155	8	26868	0.296411
GO:0034497	protein localization to phagophore assembly site	biological_process	7	LOC_Os05g07710	1	1155	8	26868	0.296411
GO:0006614	SRP-dependent cotranslational protein targeting to membrane	biological_process	14	LOC_Os05g43390	1	1155	8	26868	0.296411
GO:0033201	alpha-1,4-glucan synthase activity	molecular_function	7	LOC_Os01g52250	1	1155	8	26868	0.296411
GO:0009830	cell wall modification involved in abscission	biological_process	9	LOC_Os03g59330	1	1155	8	26868	0.296411
GO:0051298	centrosome duplication	biological_process	5	LOC_Os09g27370	1	1155	8	26868	0.296411
GO:0006970	response to osmotic stress	biological_process	5	LOC_Os06g11860;LOC_Os03g09170;LOC_Os05g27730;LOC_Os03g44380;LOC_Os03g06360;LOC_Os11g10510;LOC_Os03g17700;LOC_Os05g31750;LOC_Os09g20390;LOC_Os01g61080	10	1155	190	26868	0.30163
GO:0000977	RNA polymerase II regulatory region sequence-specific DNA binding	molecular_function	9	LOC_Os09g33882;LOC_Os03g06850;LOC_Os01g01870;LOC_Os01g54210;LOC_Os08g09840	5	1155	85	26868	0.302279
GO:0016597	amino acid binding	molecular_function	7	LOC_Os08g42080;LOC_Os03g14370;LOC_Os07g29330	3	1155	45	26868	0.305126
GO:0015297	antiporter activity	molecular_function	7	LOC_Os04g35540;LOC_Os10g30070;LOC_Os01g11160	3	1155	45	26868	0.305126
GO:0009579	thylakoid	cellular_component	5	LOC_Os12g38640;LOC_Os02g51710;LOC_Os05g48630;LOC_Os03g17070;LOC_Os07g34570;LOC_Os02g09940;LOC_Os07g05365	7	1155	127	26868	0.30548
GO:0046777	protein autophosphorylation	biological_process	10	LOC_Os03g48270;LOC_Os04g42451;LOC_Os02g03410;LOC_Os02g02140;LOC_Os03g03280;LOC_Os04g49690;LOC_Os01g66860	7	1155	127	26868	0.30548
GO:0016298	lipase activity	molecular_function	6	LOC_Os01g21560;LOC_Os01g21520;LOC_Os01g54470;LOC_Os01g11730	4	1155	65	26868	0.305652
GO:0009825	multidimensional cell growth	biological_process	5	LOC_Os10g35460;LOC_Os11g31950	2	1155	26	26868	0.308357
GO:0004439	phosphatidylinositol-4,5-bisphosphate 5-phosphatase activity	molecular_function	10	LOC_Os09g23140;LOC_Os01g08780	2	1155	26	26868	0.308357
GO:0009055	electron transfer activity	molecular_function	5	LOC_Os01g27140;LOC_Os10g34170;LOC_Os06g48510;LOC_Os07g06600;LOC_Os01g47760;LOC_Os01g64120	6	1155	107	26868	0.31247
GO:0005215	transporter activity	molecular_function	3	LOC_Os01g37590;LOC_Os04g36040;LOC_Os05g35650;LOC_Os08g05910;LOC_Os07g24230;LOC_Os01g65169;LOC_Os11g04030;LOC_Os02g44730;LOC_Os05g18294;LOC_Os05g13320;LOC_Os08g39370;LOC_Os12g44110	12	1155	236	26868	0.317173
GO:0031463	Cul3-RING ubiquitin ligase complex	cellular_component	7	LOC_Os11g14140;LOC_Os02g10850	2	1155	27	26868	0.324384
GO:0051865	protein autoubiquitination	biological_process	12	LOC_Os01g74320;LOC_Os09g31200	2	1155	27	26868	0.324384
GO:0051119	sugar transmembrane transporter activity	molecular_function	6	LOC_Os02g30910;LOC_Os01g50460	2	1155	27	26868	0.324384
GO:0009636	response to toxic substance	biological_process	5	LOC_Os02g28170	1	1155	9	26868	0.326666
GO:0009641	shade avoidance	biological_process	8	LOC_Os10g41230	1	1155	9	26868	0.326666
GO:0000922	spindle pole	cellular_component	6	LOC_Os08g41890	1	1155	9	26868	0.326666
GO:0010158	abaxial cell fate specification	biological_process	6	LOC_Os04g45330	1	1155	9	26868	0.326666
GO:0055028	cortical microtubule	cellular_component	9	LOC_Os08g41890	1	1155	9	26868	0.326666
GO:0009927	histidine phosphotransfer kinase activity	molecular_function	8	LOC_Os05g09410	1	1155	9	26868	0.326666
GO:0017110	nucleoside-diphosphatase activity	molecular_function	8	LOC_Os11g03270	1	1155	9	26868	0.326666
GO:0010582	floral meristem determinacy	biological_process	5	LOC_Os01g72020	1	1155	9	26868	0.326666
GO:0004066	asparagine synthase (glutamine-hydrolyzing) activity	molecular_function	7	LOC_Os04g58280	1	1155	9	26868	0.326666
GO:0019243	methylglyoxal catabolic process to D-lactate via S-lactoyl-glutathione	biological_process	11	LOC_Os01g11860	1	1155	9	26868	0.326666
GO:0070469	respirasome	cellular_component	4	LOC_Os04g51150	1	1155	9	26868	0.326666
GO:0033169	histone H3-K9 demethylation	biological_process	13	LOC_Os03g57560	1	1155	9	26868	0.326666
GO:0016157	sucrose synthase activity	molecular_function	8	LOC_Os01g69030	1	1155	9	26868	0.326666
GO:0048025	negative regulation of mRNA splicing, via spliceosome	biological_process	10	LOC_Os04g53720	1	1155	9	26868	0.326666
GO:0010359	regulation of anion channel activity	biological_process	8	LOC_Os08g14940	1	1155	9	26868	0.326666
GO:0005742	mitochondrial outer membrane translocase complex	cellular_component	6	LOC_Os02g29400	1	1155	9	26868	0.326666
GO:0010077	maintenance of inflorescence meristem identity	biological_process	6	LOC_Os02g01355	1	1155	9	26868	0.326666
GO:0045165	cell fate commitment	biological_process	5	LOC_Os04g45330	1	1155	9	26868	0.326666
GO:0006529	asparagine biosynthetic process	biological_process	12	LOC_Os04g58280	1	1155	9	26868	0.326666
GO:0090436	leaf pavement cell development	biological_process	6	LOC_Os01g51634	1	1155	9	26868	0.326666
GO:1990137	plant seed peroxidase activity	molecular_function	6	LOC_Os06g14324	1	1155	9	26868	0.326666
GO:0046855	inositol phosphate dephosphorylation	biological_process	9	LOC_Os01g08780	1	1155	9	26868	0.326666
GO:0043015	gamma-tubulin binding	molecular_function	7	LOC_Os09g27370	1	1155	9	26868	0.326666
GO:0000285	1-phosphatidylinositol-3-phosphate 5-kinase activity	molecular_function	8	LOC_Os04g59540	1	1155	9	26868	0.326666
GO:0090307	mitotic spindle assembly	biological_process	10	LOC_Os09g27370	1	1155	9	26868	0.326666
GO:0005816	spindle pole body	cellular_component	7	LOC_Os09g27370	1	1155	9	26868	0.326666
GO:0002181	cytoplasmic translation	biological_process	9	LOC_Os01g04730;LOC_Os03g40180;LOC_Os11g05370	3	1155	47	26868	0.328928
GO:0006633	fatty acid biosynthetic process	biological_process	10	LOC_Os09g34930;LOC_Os05g49290;LOC_Os01g05744;LOC_Os02g11070;LOC_Os11g06590;LOC_Os06g15170	6	1155	110	26868	0.335356
GO:0006885	regulation of pH	biological_process	10	LOC_Os12g02840;LOC_Os11g03070	2	1155	28	26868	0.340311
GO:0031122	cytoplasmic microtubule organization	biological_process	8	LOC_Os01g43480;LOC_Os09g27370	2	1155	28	26868	0.340311
GO:0051287	NAD binding	molecular_function	6	LOC_Os04g38600;LOC_Os01g53910;LOC_Os04g01660	3	1155	49	26868	0.352712
GO:0008198	ferrous iron binding	molecular_function	9	LOC_Os01g65690	1	1155	10	26868	0.355621
GO:0018454	acetoacetyl-CoA reductase activity	molecular_function	7	LOC_Os06g19530	1	1155	10	26868	0.355621
GO:0016209	antioxidant activity	molecular_function	3	LOC_Os02g09940	1	1155	10	26868	0.355621
GO:0009011	starch synthase activity	molecular_function	8	LOC_Os01g52250	1	1155	10	26868	0.355621
GO:0004033	aldo-keto reductase (NADP) activity	molecular_function	7	LOC_Os07g04990	1	1155	10	26868	0.355621
GO:0009098	leucine biosynthetic process	biological_process	11	LOC_Os10g40200	1	1155	10	26868	0.355621
GO:0010598	NAD(P)H dehydrogenase complex (plastoquinone)	cellular_component	5	LOC_Os11g10990	1	1155	10	26868	0.355621
GO:0019899	enzyme binding	molecular_function	5	LOC_Os01g05744	1	1155	10	26868	0.355621
GO:0009938	negative regulation of gibberellic acid mediated signaling pathway	biological_process	9	LOC_Os02g48320	1	1155	10	26868	0.355621
GO:0000381	regulation of alternative mRNA splicing, via spliceosome	biological_process	10	LOC_Os02g14780	1	1155	10	26868	0.355621
GO:0009812	flavonoid metabolic process	biological_process	5	LOC_Os11g26390	1	1155	10	26868	0.355621
GO:0008356	asymmetric cell division	biological_process	5	LOC_Os09g28200	1	1155	10	26868	0.355621
GO:0080118	brassinosteroid sulfotransferase activity	molecular_function	7	LOC_Os11g04530	1	1155	10	26868	0.355621
GO:0002020	protease binding	molecular_function	6	LOC_Os11g47760	1	1155	10	26868	0.355621
GO:0019139	cytokinin dehydrogenase activity	molecular_function	6	LOC_Os01g56810	1	1155	10	26868	0.355621
GO:0005731	nucleolus organizer region	cellular_component	8	LOC_Os03g57560	1	1155	10	26868	0.355621
GO:0048574	long-day photoperiodism, flowering	biological_process	9	LOC_Os02g49840	1	1155	10	26868	0.355621
GO:0071486	cellular response to high light intensity	biological_process	9	LOC_Os04g54630	1	1155	10	26868	0.355621
GO:0009698	phenylpropanoid metabolic process	biological_process	6	LOC_Os08g34790	1	1155	10	26868	0.355621
GO:2000762	regulation of phenylpropanoid metabolic process	biological_process	7	LOC_Os01g65370	1	1155	10	26868	0.355621
GO:0045703	ketoreductase activity	molecular_function	6	LOC_Os06g19530	1	1155	10	26868	0.355621
GO:0010483	pollen tube reception	biological_process	5	LOC_Os04g49690	1	1155	10	26868	0.355621
GO:0010319	stromule	cellular_component	7	LOC_Os10g11140;LOC_Os07g34570	2	1155	29	26868	0.356119
GO:0000911	cytokinesis by cell plate formation	biological_process	6	LOC_Os08g41890;LOC_Os11g31950	2	1155	29	26868	0.356119
GO:0006520	cellular amino acid metabolic process	biological_process	8	LOC_Os10g37340;LOC_Os07g01020	2	1155	29	26868	0.356119
GO:0030150	protein import into mitochondrial matrix	biological_process	12	LOC_Os02g29400;LOC_Os06g50870	2	1155	29	26868	0.356119
GO:0030163	protein catabolic process	biological_process	7	LOC_Os01g62630;LOC_Os07g46480;LOC_Os02g21040;LOC_Os06g10670;LOC_Os06g40818;LOC_Os06g03120;LOC_Os06g03080;LOC_Os02g48900;LOC_Os04g58840;LOC_Os09g30414;LOC_Os05g33400;LOC_Os04g45270;LOC_Os11g08100;LOC_Os02g48860	14	1155	289	26868	0.362071
GO:0008233	peptidase activity	molecular_function	5	LOC_Os02g08270;LOC_Os04g46830;LOC_Os03g57970;LOC_Os06g07220	4	1155	71	26868	0.364675
GO:0015979	photosynthesis	biological_process	5	LOC_Os01g70820;LOC_Os07g05365;LOC_Os05g48630;LOC_Os09g17740	4	1155	71	26868	0.364675
GO:0046872	metal ion binding	molecular_function	6	LOC_Os08g38220;LOC_Os07g09190;LOC_Os01g33160;LOC_Os06g35520;LOC_Os11g15570;LOC_Os05g35580;LOC_Os02g47510;LOC_Os10g02070;LOC_Os02g49440;LOC_Os04g51150;LOC_Os04g37430;LOC_Os05g03760;LOC_Os05g10650;LOC_Os11g13930;LOC_Os03g22020;LOC_Os12g03110;LOC_Os01g36620;LOC_Os12g26290;LOC_Os01g58640;LOC_Os05g37190;LOC_Os12g24800;LOC_Os01g27140;LOC_Os02g14170;LOC_Os10g28630;LOC_Os06g35480;LOC_Os01g69270;LOC_Os06g…	43	1155	943	26868	0.366398
GO:0048038	quinone binding	molecular_function	5	LOC_Os11g10990;LOC_Os04g20164	2	1155	30	26868	0.371789
GO:0006623	protein targeting to vacuole	biological_process	12	LOC_Os08g02354;LOC_Os02g27130	2	1155	30	26868	0.371789
GO:0030246	carbohydrate binding	molecular_function	4	LOC_Os03g56160;LOC_Os07g03840;LOC_Os02g48210;LOC_Os07g48500;LOC_Os07g04040;LOC_Os04g44900;LOC_Os04g44910;LOC_Os06g17490;LOC_Os08g44040	9	1155	182	26868	0.382199
GO:0015189	L-lysine transmembrane transporter activity	molecular_function	7	LOC_Os01g11160	1	1155	11	26868	0.383332
GO:1903401	L-lysine transmembrane transport	biological_process	8	LOC_Os01g11160	1	1155	11	26868	0.383332
GO:0042274	ribosomal small subunit biogenesis	biological_process	6	LOC_Os07g06090	1	1155	11	26868	0.383332
GO:0010214	seed coat development	biological_process	5	LOC_Os04g58710	1	1155	11	26868	0.383332
GO:0004337	geranyltranstransferase activity	molecular_function	7	LOC_Os04g56230	1	1155	11	26868	0.383332
GO:1900150	regulation of defense response to fungus	biological_process	7	LOC_Os06g14406	1	1155	11	26868	0.383332
GO:0009717	isoflavonoid biosynthetic process	biological_process	8	LOC_Os06g11130	1	1155	11	26868	0.383332
GO:0005786	signal recognition particle, endoplasmic reticulum targeting	cellular_component	7	LOC_Os05g43390	1	1155	11	26868	0.383332
GO:0012507	ER to Golgi transport vesicle membrane	cellular_component	8	LOC_Os10g39950	1	1155	11	26868	0.383332
GO:0005313	L-glutamate transmembrane transporter activity	molecular_function	8	LOC_Os01g11160	1	1155	11	26868	0.383332
GO:0002229	defense response to oomycetes	biological_process	8	LOC_Os11g44680	1	1155	11	26868	0.383332
GO:0033987	2-hydroxyisoflavanone dehydratase activity	molecular_function	7	LOC_Os06g11130	1	1155	11	26868	0.383332
GO:0005945	6-phosphofructokinase complex	cellular_component	7	LOC_Os05g10650	1	1155	11	26868	0.383332
GO:0051510	regulation of unidimensional cell growth	biological_process	7	LOC_Os03g03280	1	1155	11	26868	0.383332
GO:0009099	valine biosynthetic process	biological_process	11	LOC_Os10g40200	1	1155	11	26868	0.383332
GO:0046287	isoflavonoid metabolic process	biological_process	7	LOC_Os06g11130	1	1155	11	26868	0.383332
GO:0048528	post-embryonic root development	biological_process	7	LOC_Os08g41890	1	1155	11	26868	0.383332
GO:0004022	alcohol dehydrogenase (NAD) activity	molecular_function	7	LOC_Os11g10510	1	1155	11	26868	0.383332
GO:0008219	cell death	biological_process	4	LOC_Os12g26290;LOC_Os01g09800	2	1155	31	26868	0.387302
GO:0007049	cell cycle	biological_process	4	LOC_Os09g29100;LOC_Os08g03620;LOC_Os03g41100;LOC_Os07g37010;LOC_Os09g39960	5	1155	95	26868	0.387888
GO:0005743	mitochondrial inner membrane	cellular_component	6	LOC_Os04g51150;LOC_Os08g04630;LOC_Os08g15170	3	1155	52	26868	0.388164
GO:0009828	plant-type cell wall loosening	biological_process	9	LOC_Os04g51460;LOC_Os03g21820;LOC_Os10g40710	3	1155	52	26868	0.388164
GO:0009570	chloroplast stroma	cellular_component	8	LOC_Os07g09190;LOC_Os06g07960;LOC_Os10g11140;LOC_Os10g40200;LOC_Os06g48510;LOC_Os05g03030;LOC_Os12g24650;LOC_Os05g35580;LOC_Os07g34570;LOC_Os10g41550;LOC_Os08g28240;LOC_Os07g33660;LOC_Os04g32560;LOC_Os02g09940;LOC_Os01g48500;LOC_Os01g19740;LOC_Os03g44380;LOC_Os02g47560;LOC_Os04g38600;LOC_Os06g07860;LOC_Os04g58710	21	1155	453	26868	0.392762
GO:0005506	iron ion binding	molecular_function	8	LOC_Os08g16260;LOC_Os05g37250;LOC_Os01g72260;LOC_Os01g63930;LOC_Os06g48510	5	1155	96	26868	0.396476
GO:0019825	oxygen binding	molecular_function	5	LOC_Os01g72260;LOC_Os01g63930;LOC_Os05g37250	3	1155	53	26868	0.399883
GO:0010431	seed maturation	biological_process	5	LOC_Os12g24320;LOC_Os01g55690	2	1155	32	26868	0.402644
GO:0016049	cell growth	biological_process	4	LOC_Os04g38900;LOC_Os01g51634	2	1155	32	26868	0.402644
GO:0045454	cell redox homeostasis	biological_process	5	LOC_Os10g34170;LOC_Os03g29190;LOC_Os01g27140;LOC_Os07g06600;LOC_Os01g47760	5	1155	97	26868	0.405053
GO:0055085	transmembrane transport	biological_process	6	LOC_Os10g30070;LOC_Os01g50100;LOC_Os08g05690;LOC_Os03g58580;LOC_Os11g04030;LOC_Os02g44730;LOC_Os05g13320;LOC_Os01g50080	8	1155	164	26868	0.408884
GO:0045273	respiratory chain complex II	cellular_component	5	LOC_Os08g02080	1	1155	12	26868	0.409852
GO:0007205	protein kinase C-activating G protein-coupled receptor signaling pathway	biological_process	6	LOC_Os03g31180	1	1155	12	26868	0.409852
GO:0050829	defense response to Gram-negative bacterium	biological_process	9	LOC_Os09g25760	1	1155	12	26868	0.409852
GO:0051260	protein homooligomerization	biological_process	8	LOC_Os04g57350	1	1155	12	26868	0.409852
GO:0010540	basipetal auxin transport	biological_process	9	LOC_Os08g34240	1	1155	12	26868	0.409852
GO:0050821	protein stabilization	biological_process	6	LOC_Os06g50870	1	1155	12	26868	0.409852
GO:0048825	cotyledon development	biological_process	6	LOC_Os01g46870	1	1155	12	26868	0.409852
GO:0010497	plasmodesmata-mediated intercellular transport	biological_process	7	LOC_Os01g14670	1	1155	12	26868	0.409852
GO:0030570	pectate lyase activity	molecular_function	7	LOC_Os01g36620	1	1155	12	26868	0.409852
GO:0046577	long-chain-alcohol oxidase activity	molecular_function	7	LOC_Os10g33520	1	1155	12	26868	0.409852
GO:0004675	transmembrane receptor protein serine/threonine kinase activity	molecular_function	9	LOC_Os01g04570	1	1155	12	26868	0.409852
GO:0006986	response to unfolded protein	biological_process	6	LOC_Os04g01740	1	1155	12	26868	0.409852
GO:0006189	'de novo' IMP biosynthetic process	biological_process	13	LOC_Os05g35580	1	1155	12	26868	0.409852
GO:0055046	microgametogenesis	biological_process	4	LOC_Os03g57560	1	1155	12	26868	0.409852
GO:0009877	nodulation	biological_process	6	LOC_Os11g03270	1	1155	12	26868	0.409852
GO:0009635	response to herbicide	biological_process	5	LOC_Os08g05910	1	1155	12	26868	0.409852
GO:0015491	cation:cation antiporter activity	molecular_function	8	LOC_Os10g30070	1	1155	12	26868	0.409852
GO:0030095	chloroplast photosystem II	cellular_component	8	LOC_Os04g31040	1	1155	12	26868	0.409852
GO:0004143	diacylglycerol kinase activity	molecular_function	7	LOC_Os03g31180	1	1155	12	26868	0.409852
GO:0009965	leaf morphogenesis	biological_process	6	LOC_Os03g04070;LOC_Os11g40840;LOC_Os06g51070	3	1155	54	26868	0.411539
GO:0009706	chloroplast inner membrane	cellular_component	7	LOC_Os04g30420;LOC_Os04g32560;LOC_Os03g14915;LOC_Os04g28990	4	1155	76	26868	0.413732
GO:0005874	microtubule	cellular_component	7	LOC_Os08g41890;LOC_Os09g39960;LOC_Os04g48870;LOC_Os08g32520	4	1155	76	26868	0.413732
GO:0000271	polysaccharide biosynthetic process	biological_process	7	LOC_Os03g19310;LOC_Os03g18820	2	1155	33	26868	0.4178
GO:0005385	zinc ion transmembrane transporter activity	molecular_function	10	LOC_Os07g12890;LOC_Os03g29850	2	1155	33	26868	0.4178
GO:0008194	UDP-glycosyltransferase activity	molecular_function	6	LOC_Os04g46980;LOC_Os04g42690	2	1155	33	26868	0.4178
GO:0045893	positive regulation of transcription, DNA-templated	biological_process	9	LOC_Os12g38640;LOC_Os09g16510;LOC_Os01g09800;LOC_Os07g12510;LOC_Os08g38220;LOC_Os09g11480;LOC_Os02g01355;LOC_Os05g45410	8	1155	166	26868	0.422011
GO:0006749	glutathione metabolic process	biological_process	8	LOC_Os10g38780;LOC_Os07g05800;LOC_Os10g38540;LOC_Os10g38470;LOC_Os09g29200;LOC_Os10g38700;LOC_Os05g34150;LOC_Os01g27210	8	1155	166	26868	0.422011
GO:0009733	response to auxin	biological_process	6	LOC_Os04g43680;LOC_Os07g40290;LOC_Os08g38220;LOC_Os12g03150;LOC_Os04g38900;LOC_Os03g60509;LOC_Os04g48850;LOC_Os02g09480;LOC_Os04g40630;LOC_Os05g04680	10	1155	211	26868	0.422073
GO:0015035	protein disulfide oxidoreductase activity	molecular_function	7	LOC_Os01g27140;LOC_Os10g34170;LOC_Os01g47760;LOC_Os07g06600	4	1155	77	26868	0.423459
GO:0004693	cyclin-dependent protein serine/threonine kinase activity	molecular_function	9	LOC_Os09g29100;LOC_Os07g37010	2	1155	34	26868	0.432758
GO:0016722	oxidoreductase activity, oxidizing metal ions	molecular_function	5	LOC_Os01g63190;LOC_Os01g03620;LOC_Os11g42220	3	1155	56	26868	0.434628
GO:0009116	nucleoside metabolic process	biological_process	8	LOC_Os05g35580	1	1155	13	26868	0.435233
GO:0001558	regulation of cell growth	biological_process	6	LOC_Os11g40840	1	1155	13	26868	0.435233
GO:0080019	fatty-acyl-CoA reductase (alcohol-forming) activity	molecular_function	7	LOC_Os04g28520	1	1155	13	26868	0.435233
GO:0048768	root hair cell tip growth	biological_process	8	LOC_Os01g51634	1	1155	13	26868	0.435233
GO:0048229	gametophyte development	biological_process	5	LOC_Os12g43640	1	1155	13	26868	0.435233
GO:0010047	fruit dehiscence	biological_process	6	LOC_Os03g59330	1	1155	13	26868	0.435233
GO:0016208	AMP binding	molecular_function	5	LOC_Os04g58710	1	1155	13	26868	0.435233
GO:0048467	gynoecium development	biological_process	6	LOC_Os01g51634	1	1155	13	26868	0.435233
GO:0000795	synaptonemal complex	cellular_component	8	LOC_Os04g37960	1	1155	13	26868	0.435233
GO:0010204	defense response signaling pathway, resistance gene-independent	biological_process	6	LOC_Os08g14940	1	1155	13	26868	0.435233
GO:0030308	negative regulation of cell growth	biological_process	7	LOC_Os04g49690	1	1155	13	26868	0.435233
GO:0004124	cysteine synthase activity	molecular_function	6	LOC_Os06g36880	1	1155	13	26868	0.435233
GO:0035336	long-chain fatty-acyl-CoA metabolic process	biological_process	9	LOC_Os04g28520	1	1155	13	26868	0.435233
GO:0048577	negative regulation of short-day photoperiodism, flowering	biological_process	9	LOC_Os06g34450	1	1155	13	26868	0.435233
GO:0009933	meristem structural organization	biological_process	5	LOC_Os04g45330	1	1155	13	26868	0.435233
GO:0035197	siRNA binding	molecular_function	8	LOC_Os03g57560	1	1155	13	26868	0.435233
GO:0051011	microtubule minus-end binding	molecular_function	8	LOC_Os09g27370	1	1155	13	26868	0.435233
GO:0007094	mitotic spindle assembly checkpoint	biological_process	13	LOC_Os02g50799	1	1155	13	26868	0.435233
GO:0030145	manganese ion binding	molecular_function	8	LOC_Os12g24650	1	1155	13	26868	0.435233
GO:0009834	plant-type secondary cell wall biogenesis	biological_process	7	LOC_Os05g07060;LOC_Os02g06380;LOC_Os03g57910	3	1155	57	26868	0.446047
GO:0008283	cell population proliferation	biological_process	3	LOC_Os03g52320;LOC_Os08g41890	2	1155	35	26868	0.447507
GO:0030136	clathrin-coated vesicle	cellular_component	8	LOC_Os02g55970;LOC_Os11g31950	2	1155	35	26868	0.447507
GO:0016567	protein ubiquitination	biological_process	11	LOC_Os02g52210;LOC_Os10g40490;LOC_Os06g06490;LOC_Os02g34410;LOC_Os04g40100;LOC_Os04g34140;LOC_Os09g39650;LOC_Os04g40630;LOC_Os01g72020;LOC_Os05g38530;LOC_Os02g03760;LOC_Os12g40460;LOC_Os06g34450;LOC_Os09g31200;LOC_Os09g39620;LOC_Os08g38700;LOC_Os07g37400;LOC_Os05g36360;LOC_Os01g09800;LOC_Os11g34080	20	1155	446	26868	0.455552
GO:0009646	response to absence of light	biological_process	8	LOC_Os01g21250	1	1155	14	26868	0.459522
GO:0009501	amyloplast	cellular_component	7	LOC_Os01g52250	1	1155	14	26868	0.459522
GO:0010093	specification of floral organ identity	biological_process	5	LOC_Os04g45330	1	1155	14	26868	0.459522
GO:0048437	floral organ development	biological_process	5	LOC_Os12g43640	1	1155	14	26868	0.459522
GO:0016207	4-coumarate-CoA ligase activity	molecular_function	7	LOC_Os08g34790	1	1155	14	26868	0.459522
GO:0006949	syncytium formation	biological_process	4	LOC_Os03g21820	1	1155	14	26868	0.459522
GO:0043067	regulation of programmed cell death	biological_process	7	LOC_Os11g34080	1	1155	14	26868	0.459522
GO:0046685	response to arsenic-containing substance	biological_process	5	LOC_Os10g31780	1	1155	14	26868	0.459522
GO:0009725	response to hormone	biological_process	5	LOC_Os10g41230	1	1155	14	26868	0.459522
GO:0045271	respiratory chain complex I	cellular_component	6	LOC_Os02g35610	1	1155	14	26868	0.459522
GO:0015140	malate transmembrane transporter activity	molecular_function	9	LOC_Os11g11330	1	1155	14	26868	0.459522
GO:0010215	cellulose microfibril organization	biological_process	7	LOC_Os10g35460	1	1155	14	26868	0.459522
GO:0005987	sucrose catabolic process	biological_process	9	LOC_Os01g22900	1	1155	14	26868	0.459522
GO:0040007	growth	biological_process	3	LOC_Os04g37430	1	1155	14	26868	0.459522
GO:0009631	cold acclimation	biological_process	6	LOC_Os02g44870;LOC_Os02g45450	2	1155	36	26868	0.462038
GO:0008146	sulfotransferase activity	molecular_function	6	LOC_Os11g26390;LOC_Os11g04530	2	1155	36	26868	0.462038
GO:0009624	response to nematode	biological_process	7	LOC_Os03g47140;LOC_Os04g36040	2	1155	36	26868	0.462038
GO:0008375	acetylglucosaminyltransferase activity	molecular_function	7	LOC_Os02g22160;LOC_Os03g44580	2	1155	36	26868	0.462038
GO:0048653	anther development	biological_process	5	LOC_Os12g43640;LOC_Os04g37430	2	1155	36	26868	0.462038
GO:0016787	hydrolase activity	molecular_function	4	LOC_Os01g07420;LOC_Os02g47620;LOC_Os09g23140;LOC_Os11g17540;LOC_Os03g10620;LOC_Os04g57350;LOC_Os03g17070;LOC_Os02g44290;LOC_Os05g32380;LOC_Os10g40290;LOC_Os03g49440;LOC_Os11g17504;LOC_Os07g28260;LOC_Os02g47560;LOC_Os05g42230;LOC_Os01g08780;LOC_Os01g66840;LOC_Os03g03200	18	1155	402	26868	0.463787
GO:0071944	cell periphery	cellular_component	4	LOC_Os01g57854;LOC_Os04g40100;LOC_Os03g01020	3	1155	59	26868	0.468597
GO:0007169	transmembrane receptor protein tyrosine kinase signaling pathway	biological_process	7	LOC_Os01g66760;LOC_Os03g56250;LOC_Os08g24310;LOC_Os08g14940;LOC_Os02g14480;LOC_Os02g02140;LOC_Os01g48570;LOC_Os12g43640;LOC_Os08g14950;LOC_Os11g07225;LOC_Os09g02250	11	1155	243	26868	0.474028
GO:0000027	ribosomal large subunit assembly	biological_process	9	LOC_Os01g24690;LOC_Os10g31864	2	1155	37	26868	0.476341
GO:0006790	sulfur compound metabolic process	biological_process	5	LOC_Os02g35200	1	1155	15	26868	0.482769
GO:0009269	response to desiccation	biological_process	6	LOC_Os05g50710	1	1155	15	26868	0.482769
GO:0031072	heat shock protein binding	molecular_function	5	LOC_Os05g01950	1	1155	15	26868	0.482769
GO:0006814	sodium ion transport	biological_process	9	LOC_Os10g30070	1	1155	15	26868	0.482769
GO:0004707	MAP kinase activity	molecular_function	9	LOC_Os03g17700	1	1155	15	26868	0.482769
GO:0042147	retrograde transport, endosome to Golgi	biological_process	8	LOC_Os03g09140	1	1155	15	26868	0.482769
GO:0007015	actin filament organization	biological_process	6	LOC_Os06g29350	1	1155	15	26868	0.482769
GO:0004427	inorganic diphosphatase activity	molecular_function	8	LOC_Os05g36260	1	1155	15	26868	0.482769
GO:2000280	regulation of root development	biological_process	7	LOC_Os01g14670	1	1155	15	26868	0.482769
GO:0000422	autophagy of mitochondrion	biological_process	7	LOC_Os05g07710	1	1155	15	26868	0.482769
GO:0080092	regulation of pollen tube growth	biological_process	9	LOC_Os03g29190	1	1155	15	26868	0.482769
GO:0007143	female meiotic nuclear division	biological_process	5	LOC_Os03g57560	1	1155	15	26868	0.482769
GO:0040029	regulation of gene expression, epigenetic	biological_process	8	LOC_Os06g14406	1	1155	15	26868	0.482769
GO:0010380	regulation of chlorophyll biosynthetic process	biological_process	9	LOC_Os04g32560	1	1155	15	26868	0.482769
GO:0045330	aspartyl esterase activity	molecular_function	6	LOC_Os09g39760	1	1155	15	26868	0.482769
GO:0042938	dipeptide transport	biological_process	10	LOC_Os01g65169;LOC_Os05g35650	2	1155	38	26868	0.490411
GO:0006508	proteolysis	biological_process	7	LOC_Os02g21040;LOC_Os06g40818;LOC_Os03g57970;LOC_Os04g45270;LOC_Os06g03120;LOC_Os07g32560;LOC_Os07g46480;LOC_Os11g08100;LOC_Os02g48900;LOC_Os09g30414;LOC_Os02g48860;LOC_Os04g58840;LOC_Os07g44410;LOC_Os06g07220;LOC_Os01g62630;LOC_Os06g03080;LOC_Os05g33400;LOC_Os12g24650;LOC_Os04g46830;LOC_Os06g10670	20	1155	457	26868	0.499755
GO:0009640	photomorphogenesis	biological_process	8	LOC_Os04g45690;LOC_Os02g39360	2	1155	39	26868	0.504239
GO:0008284	positive regulation of cell population proliferation	biological_process	7	LOC_Os04g36670	1	1155	16	26868	0.505016
GO:0009097	isoleucine biosynthetic process	biological_process	11	LOC_Os10g40200	1	1155	16	26868	0.505016
GO:0031307	integral component of mitochondrial outer membrane	cellular_component	8	LOC_Os02g29400	1	1155	16	26868	0.505016
GO:0003872	6-phosphofructokinase activity	molecular_function	8	LOC_Os05g10650	1	1155	16	26868	0.505016
GO:0009514	glyoxysome	cellular_component	8	LOC_Os03g14000	1	1155	16	26868	0.505016
GO:0009086	methionine biosynthetic process	biological_process	11	LOC_Os10g28630	1	1155	16	26868	0.505016
GO:0051302	regulation of cell division	biological_process	6	LOC_Os11g40840	1	1155	16	26868	0.505016
GO:0045036	protein targeting to chloroplast	biological_process	12	LOC_Os04g32560	1	1155	16	26868	0.505016
GO:0061512	protein localization to cilium	biological_process	8	LOC_Os12g06630	1	1155	16	26868	0.505016
GO:0044804	autophagy of nucleus	biological_process	7	LOC_Os05g07710	1	1155	16	26868	0.505016
GO:0072686	mitotic spindle	cellular_component	7	LOC_Os08g41890	1	1155	16	26868	0.505016
GO:0004177	aminopeptidase activity	molecular_function	8	LOC_Os12g24650	1	1155	16	26868	0.505016
GO:0008097	5S rRNA binding	molecular_function	8	LOC_Os03g48840	1	1155	16	26868	0.505016
GO:0006629	lipid metabolic process	biological_process	5	LOC_Os05g32380;LOC_Os02g43700;LOC_Os12g26290;LOC_Os01g05744;LOC_Os01g21520;LOC_Os01g21560	6	1155	134	26868	0.518197
GO:0005507	copper ion binding	molecular_function	8	LOC_Os11g42220;LOC_Os01g03620;LOC_Os11g06590;LOC_Os05g11320;LOC_Os10g17454;LOC_Os01g63190;LOC_Os04g20164	7	1155	158	26868	0.521888
GO:0005545	1-phosphatidylinositol binding	molecular_function	7	LOC_Os02g55970	1	1155	17	26868	0.526307
GO:0008308	voltage-gated anion channel activity	molecular_function	10	LOC_Os05g13320	1	1155	17	26868	0.526307
GO:0005982	starch metabolic process	biological_process	9	LOC_Os01g52250	1	1155	17	26868	0.526307
GO:0006002	fructose 6-phosphate metabolic process	biological_process	7	LOC_Os05g10650	1	1155	17	26868	0.526307
GO:2000024	regulation of leaf development	biological_process	8	LOC_Os04g45330	1	1155	17	26868	0.526307
GO:0009958	positive gravitropism	biological_process	7	LOC_Os04g40100	1	1155	17	26868	0.526307
GO:0009561	megagametogenesis	biological_process	4	LOC_Os03g57560	1	1155	17	26868	0.526307
GO:0051536	iron-sulfur cluster binding	molecular_function	5	LOC_Os05g35580	1	1155	17	26868	0.526307
GO:0042277	peptide binding	molecular_function	5	LOC_Os11g40840	1	1155	17	26868	0.526307
GO:0005986	sucrose biosynthetic process	biological_process	9	LOC_Os01g69030	1	1155	17	26868	0.526307
GO:0010494	cytoplasmic stress granule	cellular_component	8	LOC_Os05g45020	1	1155	17	26868	0.526307
GO:0006526	arginine biosynthetic process	biological_process	12	LOC_Os02g44000	1	1155	17	26868	0.526307
GO:0048268	clathrin coat assembly	biological_process	8	LOC_Os02g55970	1	1155	17	26868	0.526307
GO:0005929	cilium	cellular_component	4	LOC_Os12g06630	1	1155	17	26868	0.526307
GO:0006357	regulation of transcription by RNA polymerase II	biological_process	9	LOC_Os01g11860;LOC_Os09g33882;LOC_Os03g06850;LOC_Os01g01870;LOC_Os08g09840	5	1155	112	26868	0.529959
GO:0045490	pectin catabolic process	biological_process	8	LOC_Os01g36620;LOC_Os09g39760	2	1155	41	26868	0.531154
GO:0030599	pectinesterase activity	molecular_function	7	LOC_Os01g57854;LOC_Os09g39760;LOC_Os03g01020	3	1155	66	26868	0.543945
GO:0090406	pollen tube	cellular_component	6	LOC_Os02g02140;LOC_Os10g33040	2	1155	42	26868	0.544232
GO:0005747	mitochondrial respiratory chain complex I	cellular_component	7	LOC_Os04g38900;LOC_Os02g35610	2	1155	42	26868	0.544232
GO:0019843	rRNA binding	molecular_function	7	LOC_Os11g34940;LOC_Os05g03030	2	1155	42	26868	0.544232
GO:0009658	chloroplast organization	biological_process	7	LOC_Os12g38640;LOC_Os04g32560;LOC_Os09g28480;LOC_Os07g29330	4	1155	90	26868	0.544649
GO:0045492	xylan biosynthetic process	biological_process	11	LOC_Os02g06380	1	1155	18	26868	0.546683
GO:0005813	centrosome	cellular_component	7	LOC_Os09g27370	1	1155	18	26868	0.546683
GO:0010091	trichome branching	biological_process	8	LOC_Os01g51634	1	1155	18	26868	0.546683
GO:0000062	fatty-acyl-CoA binding	molecular_function	9	LOC_Os03g14000	1	1155	18	26868	0.546683
GO:0042128	nitrate assimilation	biological_process	8	LOC_Os01g37590;LOC_Os08g05910	2	1155	43	26868	0.557053
GO:0004497	monooxygenase activity	molecular_function	5	LOC_Os03g05900;LOC_Os01g72260;LOC_Os03g55800;LOC_Os03g05920;LOC_Os03g12500;LOC_Os08g16260;LOC_Os06g39880;LOC_Os07g30950	8	1155	188	26868	0.562196
GO:0009909	regulation of flower development	biological_process	8	LOC_Os06g44450;LOC_Os04g45330;LOC_Os02g39710	3	1155	68	26868	0.564307
GO:0016308	1-phosphatidylinositol-4-phosphate 5-kinase activity	molecular_function	8	LOC_Os04g59540	1	1155	19	26868	0.566183
GO:0098656	anion transmembrane transport	biological_process	8	LOC_Os08g39370	1	1155	19	26868	0.566183
GO:0015986	ATP synthesis coupled proton transport	biological_process	13	LOC_Os03g17070	1	1155	19	26868	0.566183
GO:0045037	protein import into chloroplast stroma	biological_process	11	LOC_Os04g32560	1	1155	19	26868	0.566183
GO:0006812	cation transport	biological_process	7	LOC_Os10g30070	1	1155	19	26868	0.566183
GO:0008568	microtubule-severing ATPase activity	molecular_function	11	LOC_Os01g43480	1	1155	19	26868	0.566183
GO:0007005	mitochondrion organization	biological_process	6	LOC_Os04g38900	1	1155	19	26868	0.566183
GO:0009863	salicylic acid mediated signaling pathway	biological_process	5	LOC_Os01g47760	1	1155	19	26868	0.566183
GO:0005634	nucleus	cellular_component	6	LOC_Os05g44900;LOC_Os10g25290;LOC_Os11g31630;LOC_Os05g49290;LOC_Os10g02584;LOC_Os11g25780;LOC_Os07g45074;LOC_Os11g17540;LOC_Os02g45930;LOC_Os07g41590;LOC_Os11g05320;LOC_Os05g27090;LOC_Os04g36670;LOC_Os04g54240;LOC_Os01g64310;LOC_Os09g16510;LOC_Os11g11960;LOC_Os03g57900;LOC_Os07g40780;LOC_Os03g44540;LOC_Os12g36110;LOC_Os01g11860;LOC_Os08g41890;LOC_Os08g34790;LOC_Os08g31980;LOC_Os09g28354;LOC_Os03g…	293	1155	6869	26868	0.574171
GO:0006887	exocytosis	biological_process	7	LOC_Os06g07200;LOC_Os08g13570;LOC_Os12g44250	3	1155	69	26868	0.574277
GO:0006913	nucleocytoplasmic transport	biological_process	8	LOC_Os01g47730;LOC_Os02g50799	2	1155	45	26868	0.581917
GO:0004176	ATP-dependent peptidase activity	molecular_function	11	LOC_Os07g32560;LOC_Os04g32560	2	1155	45	26868	0.581917
GO:0071554	cell wall organization or biogenesis	biological_process	4	LOC_Os06g16240;LOC_Os12g36750;LOC_Os11g13800	3	1155	70	26868	0.584104
GO:0090447	glycerol-3-phosphate 2-O-acyltransferase activity	molecular_function	8	LOC_Os03g61720	1	1155	20	26868	0.584845
GO:0001055	RNA polymerase II activity	molecular_function	10	LOC_Os12g07980	1	1155	20	26868	0.584845
GO:0030148	sphingolipid biosynthetic process	biological_process	9	LOC_Os01g05744	1	1155	20	26868	0.584845
GO:0016045	detection of bacterium	biological_process	8	LOC_Os08g14940	1	1155	20	26868	0.584845
GO:0010072	primary shoot apical meristem specification	biological_process	5	LOC_Os08g10080	1	1155	20	26868	0.584845
GO:0016998	cell wall macromolecule catabolic process	biological_process	8	LOC_Os03g04060	1	1155	20	26868	0.584845
GO:0000160	phosphorelay signal transduction system	biological_process	6	LOC_Os05g09410	1	1155	20	26868	0.584845
GO:0005811	lipid droplet	cellular_component	6	LOC_Os06g14324	1	1155	20	26868	0.584845
GO:0009904	chloroplast accumulation movement	biological_process	9	LOC_Os07g48080	1	1155	20	26868	0.584845
GO:0048579	negative regulation of long-day photoperiodism, flowering	biological_process	9	LOC_Os07g02800	1	1155	20	26868	0.584845
GO:0018105	peptidyl-serine phosphorylation	biological_process	10	LOC_Os04g42451;LOC_Os02g03410;LOC_Os03g48270	3	1155	71	26868	0.593785
GO:0003713	transcription coactivator activity	molecular_function	5	LOC_Os03g52320;LOC_Os01g11860	2	1155	46	26868	0.593957
GO:0009887	animal organ morphogenesis	biological_process	5	LOC_Os12g03290	1	1155	21	26868	0.602705
GO:0006974	cellular response to DNA damage stimulus	biological_process	6	LOC_Os07g34570	1	1155	21	26868	0.602705
GO:0010150	leaf senescence	biological_process	6	LOC_Os01g21250;LOC_Os09g16510;LOC_Os07g17330	3	1155	72	26868	0.603318
GO:0016413	O-acetyltransferase activity	molecular_function	8	LOC_Os06g16240;LOC_Os11g13800;LOC_Os12g36750	3	1155	72	26868	0.603318
GO:0016310	phosphorylation	biological_process	7	LOC_Os04g45730;LOC_Os06g04920;LOC_Os05g09410;LOC_Os03g02190;LOC_Os08g24310;LOC_Os10g30600;LOC_Os01g04580;LOC_Os03g31180;LOC_Os01g04570;LOC_Os02g10920;LOC_Os11g07225	11	1155	269	26868	0.610179
GO:0009831	plant-type cell wall modification involved in multidimensional cell growth	biological_process	9	LOC_Os03g21820;LOC_Os10g40710	2	1155	48	26868	0.617254
GO:0009934	regulation of meristem structural organization	biological_process	7	LOC_Os12g43640	1	1155	22	26868	0.619797
GO:0010075	regulation of meristem growth	biological_process	7	LOC_Os12g43640	1	1155	22	26868	0.619797
GO:0019722	calcium-mediated signaling	biological_process	7	LOC_Os12g35670	1	1155	22	26868	0.619797
GO:0010167	response to nitrate	biological_process	6	LOC_Os08g05910	1	1155	22	26868	0.619797
GO:0008131	primary amine oxidase activity	molecular_function	7	LOC_Os04g20164	1	1155	22	26868	0.619797
GO:0009693	ethylene biosynthetic process	biological_process	6	LOC_Os04g48850	1	1155	22	26868	0.619797
GO:0051017	actin filament bundle assembly	biological_process	6	LOC_Os06g13030	1	1155	22	26868	0.619797
GO:0006890	retrograde vesicle-mediated transport, Golgi to endoplasmic reticulum	biological_process	8	LOC_Os03g09140	1	1155	22	26868	0.619797
GO:0003712	transcription coregulator activity	molecular_function	4	LOC_Os04g40630	1	1155	22	26868	0.619797
GO:0004712	protein serine/threonine/tyrosine kinase activity	molecular_function	8	LOC_Os07g29330;LOC_Os01g66860	2	1155	49	26868	0.628511
GO:0005774	vacuolar membrane	cellular_component	7	LOC_Os03g19990;LOC_Os01g07370;LOC_Os01g51870;LOC_Os01g61920;LOC_Os05g29920;LOC_Os09g39960;LOC_Os04g49420;LOC_Os01g11230;LOC_Os05g51520;LOC_Os05g38530;LOC_Os10g30070;LOC_Os01g40070;LOC_Os11g47760;LOC_Os04g38900;LOC_Os03g28980;LOC_Os02g51710	16	1155	395	26868	0.632055
GO:0009941	chloroplast envelope	cellular_component	7	LOC_Os02g47560;LOC_Os02g10390;LOC_Os03g17070;LOC_Os03g52910;LOC_Os02g09940;LOC_Os05g03030;LOC_Os04g32560;LOC_Os04g30420;LOC_Os01g19740;LOC_Os07g34570;LOC_Os07g04990;LOC_Os07g33660;LOC_Os09g17740;LOC_Os01g52240;LOC_Os04g28990;LOC_Os04g38600	16	1155	395	26868	0.632055
GO:0010193	response to ozone	biological_process	7	LOC_Os09g16510	1	1155	23	26868	0.636155
GO:0030014	CCR4-NOT complex	cellular_component	4	LOC_Os04g58810	1	1155	23	26868	0.636155
GO:0008417	fucosyltransferase activity	molecular_function	7	LOC_Os02g25630	1	1155	23	26868	0.636155
GO:0010218	response to far red light	biological_process	8	LOC_Os10g41230	1	1155	23	26868	0.636155
GO:0006906	vesicle fusion	biological_process	7	LOC_Os06g07200;LOC_Os12g44250	2	1155	50	26868	0.639509
GO:0003824	catalytic activity	molecular_function	3	LOC_Os10g40200;LOC_Os06g44170;LOC_Os01g53910;LOC_Os10g38930;LOC_Os06g44180;LOC_Os02g35200;LOC_Os08g43180;LOC_Os10g37340;LOC_Os09g31498	9	1155	227	26868	0.644759
GO:0022626	cytosolic ribosome	cellular_component	7	LOC_Os11g47760;LOC_Os05g03030	2	1155	51	26868	0.650248
GO:0009845	seed germination	biological_process	4	LOC_Os03g06360;LOC_Os01g08780	2	1155	51	26868	0.650248
GO:0046910	pectinesterase inhibitor activity	molecular_function	6	LOC_Os03g01020;LOC_Os01g57854	2	1155	51	26868	0.650248
GO:0009742	brassinosteroid mediated signaling pathway	biological_process	7	LOC_Os04g49690;LOC_Os03g03280	2	1155	51	26868	0.650248
GO:0070417	cellular response to cold	biological_process	6	LOC_Os01g19740	1	1155	24	26868	0.651809
GO:0042285	xylosyltransferase activity	molecular_function	7	LOC_Os03g57910	1	1155	24	26868	0.651809
GO:0000045	autophagosome assembly	biological_process	7	LOC_Os05g07710	1	1155	24	26868	0.651809
GO:0005381	iron ion transmembrane transporter activity	molecular_function	10	LOC_Os06g36450	1	1155	24	26868	0.651809
GO:0003756	protein disulfide isomerase activity	molecular_function	7	LOC_Os09g28480	1	1155	24	26868	0.651809
GO:0008643	carbohydrate transport	biological_process	7	LOC_Os02g30910;LOC_Os06g30950	2	1155	52	26868	0.660732
GO:0004806	triglyceride lipase activity	molecular_function	7	LOC_Os05g32380;LOC_Os02g43700	2	1155	52	26868	0.660732
GO:0016705	oxidoreductase activity, acting on paired donors, with incorporation or reduction of molecular oxygen	molecular_function	5	LOC_Os08g16260;LOC_Os01g72260	2	1155	52	26868	0.660732
GO:0016021	integral component of membrane	cellular_component	5	LOC_Os09g37050;LOC_Os04g36040;LOC_Os01g66760;LOC_Os10g40640;LOC_Os01g63930;LOC_Os08g24310;LOC_Os08g26840;LOC_Os03g32490;LOC_Os09g36580;LOC_Os03g52910;LOC_Os06g48250;LOC_Os02g02140;LOC_Os03g14000;LOC_Os01g50080;LOC_Os04g37670;LOC_Os01g42410;LOC_Os02g06380;LOC_Os03g18820;LOC_Os09g34930;LOC_Os08g29570;LOC_Os04g41900;LOC_Os04g54630;LOC_Os01g72610;LOC_Os11g04030;LOC_Os05g40700;LOC_Os05g37250;LOC_Os02g…	136	1155	3260	26868	0.662297
GO:0046983	protein dimerization activity	molecular_function	5	LOC_Os02g49840;LOC_Os02g01355;LOC_Os01g50940	3	1155	79	26868	0.665815
GO:0015995	chlorophyll biosynthetic process	biological_process	9	LOC_Os07g09190	1	1155	25	26868	0.666791
GO:0009903	chloroplast avoidance movement	biological_process	9	LOC_Os07g48080	1	1155	25	26868	0.666791
GO:0080156	mitochondrial mRNA modification	biological_process	11	LOC_Os10g17454	1	1155	25	26868	0.666791
GO:0009789	positive regulation of abscisic acid-activated signaling pathway	biological_process	9	LOC_Os11g44680	1	1155	25	26868	0.666791
GO:0004857	enzyme inhibitor activity	molecular_function	5	LOC_Os06g49760	1	1155	25	26868	0.666791
GO:0009451	RNA modification	biological_process	9	LOC_Os07g14150	1	1155	25	26868	0.666791
GO:0016311	dephosphorylation	biological_process	7	LOC_Os03g61720;LOC_Os01g58640	2	1155	54	26868	0.680939
GO:0019748	secondary metabolic process	biological_process	4	LOC_Os11g27170	1	1155	26	26868	0.681128
GO:0005905	clathrin-coated pit	cellular_component	4	LOC_Os02g55970	1	1155	26	26868	0.681128
GO:0007140	male meiotic nuclear division	biological_process	5	LOC_Os03g57560	1	1155	26	26868	0.681128
GO:0016621	cinnamoyl-CoA reductase activity	molecular_function	7	LOC_Os09g31498	1	1155	26	26868	0.681128
GO:0010027	thylakoid membrane organization	biological_process	7	LOC_Os11g18366	1	1155	26	26868	0.681128
GO:2000377	regulation of reactive oxygen species metabolic process	biological_process	7	LOC_Os09g23140	1	1155	26	26868	0.681128
GO:0004402	histone acetyltransferase activity	molecular_function	11	LOC_Os04g40630	1	1155	26	26868	0.681128
GO:0046620	regulation of organ growth	biological_process	7	LOC_Os09g37470	1	1155	26	26868	0.681128
GO:0009534	chloroplast thylakoid	cellular_component	7	LOC_Os04g31040;LOC_Os07g05365;LOC_Os03g17070;LOC_Os05g48630;LOC_Os12g38640	5	1155	133	26868	0.681488
GO:0032259	methylation	biological_process	4	LOC_Os06g04150;LOC_Os10g28630;LOC_Os02g48770;LOC_Os06g13560;LOC_Os01g51870;LOC_Os06g20960;LOC_Os05g47540	7	1155	185	26868	0.686964
GO:0005768	endosome	cellular_component	7	LOC_Os01g48610;LOC_Os11g13800;LOC_Os03g18820;LOC_Os04g20164;LOC_Os03g19310;LOC_Os01g48620;LOC_Os12g36750;LOC_Os01g51870;LOC_Os06g50060;LOC_Os04g57350	10	1155	261	26868	0.68908
GO:0005777	peroxisome	cellular_component	7	LOC_Os03g03790;LOC_Os01g60850;LOC_Os08g04630;LOC_Os07g17330;LOC_Os07g37730;LOC_Os02g32200	6	1155	160	26868	0.689646
GO:0016791	phosphatase activity	molecular_function	7	LOC_Os01g53720;LOC_Os03g61720	2	1155	55	26868	0.690668
GO:0010118	stomatal movement	biological_process	4	LOC_Os11g03440	1	1155	27	26868	0.694849
GO:0071215	cellular response to abscisic acid stimulus	biological_process	7	LOC_Os01g55690	1	1155	27	26868	0.694849
GO:0001085	RNA polymerase II transcription factor binding	molecular_function	6	LOC_Os01g54210	1	1155	27	26868	0.694849
GO:0006334	nucleosome assembly	biological_process	7	LOC_Os05g51850	1	1155	27	26868	0.694849
GO:0016853	isomerase activity	molecular_function	4	LOC_Os04g40660	1	1155	27	26868	0.694849
GO:0071004	U2-type prespliceosome	cellular_component	8	LOC_Os02g14780	1	1155	27	26868	0.694849
GO:0000122	negative regulation of transcription by RNA polymerase II	biological_process	10	LOC_Os11g29870	1	1155	27	26868	0.694849
GO:0022857	transmembrane transporter activity	molecular_function	4	LOC_Os07g34070;LOC_Os02g47500;LOC_Os04g34490	3	1155	83	26868	0.698158
GO:0009740	gibberellic acid mediated signaling pathway	biological_process	7	LOC_Os07g02800;LOC_Os04g51460	2	1155	56	26868	0.700151
GO:0022625	cytosolic large ribosomal subunit	cellular_component	8	LOC_Os01g24690;LOC_Os02g07890;LOC_Os03g40180;LOC_Os07g42170;LOC_Os01g04730;LOC_Os11g05370	6	1155	162	26868	0.701012
GO:0006096	glycolytic process	biological_process	10	LOC_Os05g10650;LOC_Os04g38600;LOC_Os08g02700	3	1155	84	26868	0.705862
GO:0009826	unidimensional cell growth	biological_process	7	LOC_Os06g15170;LOC_Os03g21820;LOC_Os10g40710;LOC_Os03g03280;LOC_Os09g07300	5	1155	137	26868	0.706288
GO:0005665	RNA polymerase II, core complex	cellular_component	7	LOC_Os12g07980	1	1155	28	26868	0.70798
GO:0071281	cellular response to iron ion	biological_process	8	LOC_Os04g48850	1	1155	28	26868	0.70798
GO:0005856	cytoskeleton	cellular_component	6	LOC_Os01g60850;LOC_Os06g13030	2	1155	57	26868	0.709391
GO:0000325	plant-type vacuole	cellular_component	7	LOC_Os11g37960;LOC_Os11g37950	2	1155	57	26868	0.709391
GO:0003777	microtubule motor activity	molecular_function	10	LOC_Os01g15540;LOC_Os02g39650	2	1155	58	26868	0.718392
GO:0015112	nitrate transmembrane transporter activity	molecular_function	8	LOC_Os08g05910	1	1155	29	26868	0.720546
GO:0001054	RNA polymerase I activity	molecular_function	10	LOC_Os12g07980	1	1155	29	26868	0.720546
GO:0005736	RNA polymerase I complex	cellular_component	7	LOC_Os12g07980	1	1155	29	26868	0.720546
GO:0048481	plant ovule development	biological_process	5	LOC_Os03g17700	1	1155	29	26868	0.720546
GO:0015179	L-amino acid transmembrane transporter activity	molecular_function	8	LOC_Os04g35540	1	1155	29	26868	0.720546
GO:0010053	root epidermal cell differentiation	biological_process	7	LOC_Os05g10650	1	1155	29	26868	0.720546
GO:0004672	protein kinase activity	molecular_function	7	LOC_Os02g45750;LOC_Os05g34270;LOC_Os01g66760;LOC_Os03g03280;LOC_Os09g02250;LOC_Os10g30600;LOC_Os03g17700;LOC_Os04g49690;LOC_Os02g14480;LOC_Os07g29330;LOC_Os02g02140	11	1155	295	26868	0.726761
GO:0005484	SNAP receptor activity	molecular_function	5	LOC_Os12g44250;LOC_Os06g07200	2	1155	59	26868	0.727156
GO:0005840	ribosome	cellular_component	6	LOC_Os11g34940;LOC_Os05g03030	2	1155	59	26868	0.727156
GO:0005524	ATP binding	molecular_function	5	LOC_Os02g18070;LOC_Os01g48570;LOC_Os01g51634;LOC_Os10g31864;LOC_Os08g14940;LOC_Os10g17454;LOC_Os01g19820;LOC_Os02g02140;LOC_Os01g70970;LOC_Os12g29690;LOC_Os07g04040;LOC_Os04g32560;LOC_Os05g50380;LOC_Os11g02240;LOC_Os01g66860;LOC_Os08g14950;LOC_Os04g43440;LOC_Os04g58710;LOC_Os10g30600;LOC_Os12g24320;LOC_Os04g49690;LOC_Os01g66760;LOC_Os12g28710;LOC_Os03g58790;LOC_Os05g34270;LOC_Os06g48250;LOC_Os06g…	73	1155	1807	26868	0.729794
GO:0019953	sexual reproduction	biological_process	4	LOC_Os10g40710	1	1155	30	26868	0.732572
GO:0050661	NADP binding	molecular_function	6	LOC_Os04g38600	1	1155	30	26868	0.732572
GO:0009853	photorespiration	biological_process	6	LOC_Os02g35610	1	1155	30	26868	0.732572
GO:0031977	thylakoid lumen	cellular_component	6	LOC_Os04g31040	1	1155	30	26868	0.732572
GO:0010229	inflorescence development	biological_process	6	LOC_Os03g17700	1	1155	30	26868	0.732572
GO:0045944	positive regulation of transcription by RNA polymerase II	biological_process	10	LOC_Os03g27080	1	1155	30	26868	0.732572
GO:0048366	leaf development	biological_process	7	LOC_Os01g46870;LOC_Os03g47140;LOC_Os03g52320	3	1155	88	26868	0.735171
GO:0004722	protein serine/threonine phosphatase activity	molecular_function	9	LOC_Os11g37540;LOC_Os03g16170;LOC_Os11g15570;LOC_Os03g10950;LOC_Os01g58640	5	1155	142	26868	0.735345
GO:0006486	protein glycosylation	biological_process	9	LOC_Os09g27950;LOC_Os03g18820	2	1155	61	26868	0.743993
GO:0000981	DNA-binding transcription factor activity, RNA polymerase II-specific	molecular_function	5	LOC_Os12g03290;LOC_Os11g03540	2	1155	61	26868	0.743993
GO:0000149	SNARE binding	molecular_function	5	LOC_Os12g44250;LOC_Os06g07200	2	1155	61	26868	0.743993
GO:0006811	ion transport	biological_process	6	LOC_Os05g13320	1	1155	31	26868	0.744081
GO:0048278	vesicle docking	biological_process	6	LOC_Os06g07200	1	1155	31	26868	0.744081
GO:0000175	3'-5'-exoribonuclease activity	molecular_function	9	LOC_Os04g58810	1	1155	31	26868	0.744081
GO:0045735	nutrient reservoir activity	molecular_function	3	LOC_Os01g55690	1	1155	31	26868	0.744081
GO:0010417	glucuronoxylan biosynthetic process	biological_process	12	LOC_Os03g57910	1	1155	31	26868	0.744081
GO:0000288	nuclear-transcribed mRNA catabolic process, deadenylation-dependent decay	biological_process	12	LOC_Os04g58810	1	1155	31	26868	0.744081
GO:0003779	actin binding	molecular_function	6	LOC_Os01g51634;LOC_Os01g07370;LOC_Os06g29350	3	1155	90	26868	0.748937
GO:0009574	preprophase band	cellular_component	6	LOC_Os08g41890	1	1155	32	26868	0.755096
GO:0005686	U2 snRNP	cellular_component	8	LOC_Os02g14780	1	1155	32	26868	0.755096
GO:0048573	photoperiodism, flowering	biological_process	8	LOC_Os01g04800	1	1155	32	26868	0.755096
GO:0000226	microtubule cytoskeleton organization	biological_process	7	LOC_Os08g41890	1	1155	32	26868	0.755096
GO:0051087	chaperone binding	molecular_function	5	LOC_Os06g50870	1	1155	33	26868	0.765636
GO:0005667	transcription factor complex	cellular_component	4	LOC_Os01g54210	1	1155	33	26868	0.765636
GO:0016036	cellular response to phosphate starvation	biological_process	9	LOC_Os01g14440	1	1155	33	26868	0.765636
GO:0031201	SNARE complex	cellular_component	6	LOC_Os06g07200;LOC_Os12g44250	2	1155	64	26868	0.767572
GO:0005802	trans-Golgi network	cellular_component	7	LOC_Os01g48620;LOC_Os02g56510;LOC_Os12g36750;LOC_Os03g18820;LOC_Os01g51870;LOC_Os04g20164;LOC_Os01g48610;LOC_Os03g19310;LOC_Os11g13800	9	1155	254	26868	0.767807
GO:0000209	protein polyubiquitination	biological_process	12	LOC_Os02g45780;LOC_Os04g50760;LOC_Os01g16950;LOC_Os01g74040	4	1155	121	26868	0.769001
GO:0007018	microtubule-based movement	biological_process	5	LOC_Os01g15540;LOC_Os02g39650	2	1155	65	26868	0.775001
GO:0005871	kinesin complex	cellular_component	5	LOC_Os01g15540;LOC_Os02g39650	2	1155	65	26868	0.775001
GO:0031624	ubiquitin conjugating enzyme binding	molecular_function	7	LOC_Os04g50760	1	1155	34	26868	0.775723
GO:0016538	cyclin-dependent protein serine/threonine kinase regulator activity	molecular_function	7	LOC_Os03g41100	1	1155	34	26868	0.775723
GO:0009846	pollen germination	biological_process	4	LOC_Os07g23120	1	1155	34	26868	0.775723
GO:0009294	DNA mediated transformation	biological_process	6	LOC_Os05g51850	1	1155	34	26868	0.775723
GO:0008757	S-adenosylmethionine-dependent methyltransferase activity	molecular_function	7	LOC_Os06g04150;LOC_Os05g47540;LOC_Os04g11970;LOC_Os01g51870;LOC_Os06g13560	5	1155	150	26868	0.777371
GO:0004185	serine-type carboxypeptidase activity	molecular_function	9	LOC_Os11g27170;LOC_Os05g18604	2	1155	66	26868	0.782221
GO:0031969	chloroplast membrane	cellular_component	6	LOC_Os04g48840;LOC_Os07g24230	2	1155	67	26868	0.789237
GO:0010143	cutin biosynthetic process	biological_process	7	LOC_Os03g61720	1	1155	36	26868	0.794615
GO:0004519	endonuclease activity	molecular_function	7	LOC_Os07g07480	1	1155	36	26868	0.794615
GO:0006891	intra-Golgi vesicle-mediated transport	biological_process	8	LOC_Os03g09140	1	1155	36	26868	0.794615
GO:0016485	protein processing	biological_process	8	LOC_Os10g37760	1	1155	36	26868	0.794615
GO:0032436	positive regulation of proteasomal ubiquitin-dependent protein catabolic process	biological_process	12	LOC_Os04g50760	1	1155	36	26868	0.794615
GO:0009911	positive regulation of flower development	biological_process	9	LOC_Os02g01355	1	1155	36	26868	0.794615
GO:0030276	clathrin binding	molecular_function	5	LOC_Os02g55970	1	1155	37	26868	0.803456
GO:0016758	transferase activity, transferring hexosyl groups	molecular_function	6	LOC_Os10g40640	1	1155	37	26868	0.803456
GO:0005778	peroxisomal membrane	cellular_component	8	LOC_Os03g14000	1	1155	38	26868	0.811917
GO:0010090	trichome morphogenesis	biological_process	8	LOC_Os01g51634	1	1155	38	26868	0.811917
GO:0005794	Golgi apparatus	cellular_component	6	LOC_Os01g48620;LOC_Os03g22020;LOC_Os04g20164;LOC_Os02g55970;LOC_Os02g51610;LOC_Os08g37840;LOC_Os03g09140;LOC_Os04g38900;LOC_Os03g19310;LOC_Os03g22010;LOC_Os04g30420;LOC_Os08g01940;LOC_Os06g35520;LOC_Os04g28990;LOC_Os01g69030;LOC_Os11g04530;LOC_Os09g27950;LOC_Os05g38530;LOC_Os01g48610;LOC_Os06g30950;LOC_Os12g36750;LOC_Os02g25630;LOC_Os02g14170;LOC_Os11g13800;LOC_Os03g18820;LOC_Os05g18294;LOC_Os02g…	36	1155	955	26868	0.815496
GO:0016051	carbohydrate biosynthetic process	biological_process	6	LOC_Os10g40640	1	1155	39	26868	0.820013
GO:0004867	serine-type endopeptidase inhibitor activity	molecular_function	8	LOC_Os11g13540	1	1155	40	26868	0.827762
GO:0005200	structural constituent of cytoskeleton	molecular_function	4	LOC_Os09g27370	1	1155	40	26868	0.827762
GO:0005666	RNA polymerase III complex	cellular_component	8	LOC_Os12g07980	1	1155	40	26868	0.827762
GO:0001056	RNA polymerase III activity	molecular_function	10	LOC_Os12g07980	1	1155	40	26868	0.827762
GO:0031625	ubiquitin protein ligase binding	molecular_function	7	LOC_Os05g38530;LOC_Os01g13280	2	1155	74	26868	0.832984
GO:0006810	transport	biological_process	5	LOC_Os02g47500;LOC_Os04g34490;LOC_Os07g24230;LOC_Os05g18294;LOC_Os11g10990;LOC_Os07g34070	6	1155	191	26868	0.834194
GO:0007131	reciprocal meiotic recombination	biological_process	10	LOC_Os04g37960	1	1155	41	26868	0.835177
GO:0030244	cellulose biosynthetic process	biological_process	11	LOC_Os04g24140	1	1155	41	26868	0.835177
GO:0043161	proteasome-mediated ubiquitin-dependent protein catabolic process	biological_process	11	LOC_Os08g38460;LOC_Os02g45780;LOC_Os01g74040;LOC_Os06g34450;LOC_Os04g49550;LOC_Os11g34080;LOC_Os06g03580;LOC_Os02g01700;LOC_Os01g16950;LOC_Os01g53500	10	1155	301	26868	0.83742
GO:0008270	zinc ion binding	molecular_function	8	LOC_Os11g34080;LOC_Os09g23690;LOC_Os02g10920;LOC_Os11g06590;LOC_Os02g03030;LOC_Os09g33550;LOC_Os01g60640;LOC_Os06g04920;LOC_Os02g52210;LOC_Os04g28990;LOC_Os04g30420;LOC_Os01g65690;LOC_Os08g43190;LOC_Os12g40460;LOC_Os11g45990;LOC_Os12g12560;LOC_Os12g07980;LOC_Os03g57900;LOC_Os02g03760;LOC_Os12g12470;LOC_Os03g28990;LOC_Os04g41960;LOC_Os04g40630;LOC_Os09g37050;LOC_Os02g45710;LOC_Os12g12580;LOC_Os04g…	35	1155	945	26868	0.8415
GO:0005643	nuclear pore	cellular_component	4	LOC_Os02g50799	1	1155	42	26868	0.842273
GO:0048510	regulation of timing of transition from vegetative to reproductive phase	biological_process	8	LOC_Os09g11480	1	1155	42	26868	0.842273
GO:0001046	core promoter sequence-specific DNA binding	molecular_function	9	LOC_Os11g29870	1	1155	42	26868	0.842273
GO:0043531	ADP binding	molecular_function	9	LOC_Os08g42700;LOC_Os04g30530;LOC_Os12g29690;LOC_Os02g18070;LOC_Os04g43440;LOC_Os12g17430;LOC_Os11g12320;LOC_Os06g17900;LOC_Os06g48520;LOC_Os11g11960	10	1155	303	26868	0.843101
GO:0009926	auxin polar transport	biological_process	8	LOC_Os09g07300;LOC_Os09g37470	2	1155	76	26868	0.843884
GO:0000287	magnesium ion binding	molecular_function	7	LOC_Os05g36260;LOC_Os03g46640;LOC_Os02g02930	3	1155	107	26868	0.843897
GO:0005623	cell	cellular_component	3	LOC_Os05g13320;LOC_Os05g11320	2	1155	77	26868	0.849088
GO:0019438	aromatic compound biosynthetic process	biological_process	6	LOC_Os04g11970	1	1155	44	26868	0.855563
GO:0006284	base-excision repair	biological_process	9	LOC_Os12g10850	1	1155	44	26868	0.855563
GO:0005975	carbohydrate metabolic process	biological_process	5	LOC_Os01g45060;LOC_Os08g44040;LOC_Os02g01510;LOC_Os11g14400;LOC_Os03g59330	5	1155	169	26868	0.856439
GO:0005615	extracellular space	cellular_component	4	LOC_Os08g37840;LOC_Os04g01710;LOC_Os11g13540;LOC_Os02g52010	4	1155	140	26868	0.85692
GO:0030154	cell differentiation	biological_process	5	LOC_Os12g43640;LOC_Os02g02140;LOC_Os01g54210;LOC_Os02g01355	4	1155	140	26868	0.85692
GO:0006470	protein dephosphorylation	biological_process	9	LOC_Os03g16170;LOC_Os11g37540;LOC_Os03g10950	3	1155	110	26868	0.856967
GO:0009705	plant-type vacuole membrane	cellular_component	8	LOC_Os12g25200;LOC_Os03g60509;LOC_Os06g36450;LOC_Os11g11330	4	1155	141	26868	0.860635
GO:0048316	seed development	biological_process	5	LOC_Os05g12400	1	1155	45	26868	0.861782
GO:0004386	helicase activity	molecular_function	9	LOC_Os06g14406	1	1155	45	26868	0.861782
GO:0009553	embryo sac development	biological_process	6	LOC_Os04g40630	1	1155	46	26868	0.867734
GO:0042254	ribosome biogenesis	biological_process	6	LOC_Os05g03030	1	1155	46	26868	0.867734
GO:0009734	auxin-activated signaling pathway	biological_process	6	LOC_Os08g05910;LOC_Os02g35200;LOC_Os08g10080	3	1155	113	26868	0.869068
GO:0000145	exocyst	cellular_component	7	LOC_Os08g13570	1	1155	47	26868	0.87343
GO:0051539	4 iron, 4 sulfur cluster binding	molecular_function	6	LOC_Os12g10850	1	1155	48	26868	0.87888
GO:0071555	cell wall organization	biological_process	6	LOC_Os09g23220;LOC_Os01g66840;LOC_Os01g45060;LOC_Os10g40290;LOC_Os11g33270;LOC_Os11g14400	6	1155	206	26868	0.881617
GO:0006396	RNA processing	biological_process	9	LOC_Os11g31630	1	1155	49	26868	0.884096
GO:0006464	cellular protein modification process	biological_process	8	LOC_Os02g06640	1	1155	49	26868	0.884096
GO:0000151	ubiquitin ligase complex	cellular_component	5	LOC_Os04g50760	1	1155	49	26868	0.884096
GO:0008171	O-methyltransferase activity	molecular_function	7	LOC_Os04g11970	1	1155	49	26868	0.884096
GO:0009543	chloroplast thylakoid lumen	cellular_component	8	LOC_Os04g31040	1	1155	49	26868	0.884096
GO:0048364	root development	biological_process	6	LOC_Os04g49690;LOC_Os02g45780;LOC_Os03g47140	3	1155	118	26868	0.887236
GO:0007165	signal transduction	biological_process	4	LOC_Os03g11550;LOC_Os12g02200;LOC_Os11g35410;LOC_Os11g31540;LOC_Os07g41160;LOC_Os06g18850;LOC_Os07g38130;LOC_Os01g53920;LOC_Os11g02240;LOC_Os03g17700;LOC_Os08g34240;LOC_Os11g35450	12	1155	376	26868	0.887883
GO:0010468	regulation of gene expression	biological_process	7	LOC_Os06g48750	1	1155	50	26868	0.889088
GO:0006904	vesicle docking involved in exocytosis	biological_process	7	LOC_Os08g13570	1	1155	50	26868	0.889088
GO:0008017	microtubule binding	molecular_function	7	LOC_Os08g41890	1	1155	50	26868	0.889088
GO:0005819	spindle	cellular_component	6	LOC_Os08g41890	1	1155	50	26868	0.889088
GO:0035091	phosphatidylinositol binding	molecular_function	6	LOC_Os12g06630	1	1155	50	26868	0.889088
GO:0009058	biosynthetic process	biological_process	4	LOC_Os10g40640	1	1155	50	26868	0.889088
GO:0005829	cytosol	cellular_component	6	LOC_Os04g41960;LOC_Os02g52010;LOC_Os04g58280;LOC_Os01g61920;LOC_Os08g42080;LOC_Os08g37840;LOC_Os05g50710;LOC_Os10g11140;LOC_Os08g13570;LOC_Os06g14406;LOC_Os06g35520;LOC_Os05g10650;LOC_Os01g11860;LOC_Os02g01510;LOC_Os03g01880;LOC_Os07g48080;LOC_Os01g52260;LOC_Os11g10510;LOC_Os07g39520;LOC_Os02g54820;LOC_Os11g17540;LOC_Os09g37540;LOC_Os03g29190;LOC_Os06g35480;LOC_Os11g15570;LOC_Os05g35260;LOC_Os04g…	68	1155	1807	26868	0.890876
GO:0006457	protein folding	biological_process	4	LOC_Os06g50230;LOC_Os11g47760;LOC_Os03g18870;LOC_Os06g50870;LOC_Os05g38530;LOC_Os11g10990	6	1155	210	26868	0.892142
GO:0008168	methyltransferase activity	molecular_function	6	LOC_Os06g13560;LOC_Os10g28630	2	1155	87	26868	0.893057
GO:0009524	phragmoplast	cellular_component	6	LOC_Os08g41890;LOC_Os09g39960	2	1155	87	26868	0.893057
GO:0003993	acid phosphatase activity	molecular_function	8	LOC_Os01g58640	1	1155	51	26868	0.893864
GO:0004004	ATP-dependent RNA helicase activity	molecular_function	11	LOC_Os11g31630;LOC_Os06g48750	2	1155	88	26868	0.896729
GO:0042393	histone binding	molecular_function	5	LOC_Os06g14406	1	1155	52	26868	0.898436
GO:0010008	endosome membrane	cellular_component	8	LOC_Os04g57350	1	1155	52	26868	0.898436
GO:0045087	innate immune response	biological_process	5	LOC_Os02g45750	1	1155	53	26868	0.90281
GO:0005525	GTP binding	molecular_function	8	LOC_Os05g43390;LOC_Os09g39960;LOC_Os01g47730;LOC_Os04g57350	4	1155	155	26868	0.904541
GO:0006413	translational initiation	biological_process	5	LOC_Os06g48750	1	1155	54	26868	0.906996
GO:0004721	phosphoprotein phosphatase activity	molecular_function	8	LOC_Os11g15570	1	1155	55	26868	0.911002
GO:0003697	single-stranded DNA binding	molecular_function	7	LOC_Os10g17454	1	1155	56	26868	0.914836
GO:0042631	cellular response to water deprivation	biological_process	6	LOC_Os10g37340;LOC_Os01g21250	2	1155	96	26868	0.922137
GO:0004842	ubiquitin-protein transferase activity	molecular_function	6	LOC_Os09g39620;LOC_Os09g31200;LOC_Os03g28990;LOC_Os01g74320;LOC_Os02g10850;LOC_Os10g40490;LOC_Os05g36360;LOC_Os01g45020;LOC_Os11g14140;LOC_Os02g34410;LOC_Os06g34450;LOC_Os11g45990;LOC_Os07g02910;LOC_Os06g06490;LOC_Os02g03760;LOC_Os09g39650;LOC_Os05g08010;LOC_Os02g52210;LOC_Os11g34080;LOC_Os04g34140	20	1155	614	26868	0.922243
GO:0007264	small GTPase mediated signal transduction	biological_process	6	LOC_Os01g47730	1	1155	59	26868	0.925375
GO:0005622	intracellular	cellular_component	4	LOC_Os06g11210;LOC_Os02g06640;LOC_Os08g02354;LOC_Os04g52090;LOC_Os01g27230;LOC_Os02g27130;LOC_Os12g25200;LOC_Os06g11240	8	1155	286	26868	0.928065
GO:0061630	ubiquitin protein ligase activity	molecular_function	7	LOC_Os01g16950;LOC_Os01g13280;LOC_Os02g01700;LOC_Os06g03580;LOC_Os08g38460;LOC_Os04g50760;LOC_Os04g49550;LOC_Os02g45780;LOC_Os01g53500;LOC_Os06g34450;LOC_Os01g74040	11	1155	373	26868	0.929537
GO:0042802	identical protein binding	molecular_function	5	LOC_Os11g14380;LOC_Os04g52440;LOC_Os04g48850;LOC_Os11g38580;LOC_Os01g58890;LOC_Os07g44690;LOC_Os07g35940;LOC_Os07g34260	8	1155	289	26868	0.932734
GO:0006888	endoplasmic reticulum to Golgi vesicle-mediated transport	biological_process	7	LOC_Os10g39950	1	1155	62	26868	0.934611
GO:0009832	plant-type cell wall biogenesis	biological_process	6	LOC_Os02g25630	1	1155	63	26868	0.937428
GO:0000932	P-body	cellular_component	8	LOC_Os05g45020	1	1155	64	26868	0.940125
GO:0071472	cellular response to salt stress	biological_process	7	LOC_Os03g09170;LOC_Os09g23140;LOC_Os06g11860	3	1155	139	26868	0.94125
GO:0000723	telomere maintenance	biological_process	8	LOC_Os08g41070	1	1155	67	26868	0.947536
GO:0003682	chromatin binding	molecular_function	4	LOC_Os01g54210;LOC_Os06g14406	2	1155	107	26868	0.947589
GO:0001228	DNA-binding transcription activator activity, RNA polymerase II-specific	molecular_function	6	LOC_Os01g54210	1	1155	68	26868	0.949797
GO:0003924	GTPase activity	molecular_function	9	LOC_Os09g39960;LOC_Os01g47730;LOC_Os05g43390	3	1155	144	26868	0.949957
GO:0009992	cellular water homeostasis	biological_process	8	LOC_Os02g57720	1	1155	69	26868	0.951961
GO:0015254	glycerol channel activity	molecular_function	7	LOC_Os02g57720	1	1155	69	26868	0.951961
GO:0015250	water channel activity	molecular_function	7	LOC_Os02g57720	1	1155	70	26868	0.954031
GO:0003678	DNA helicase activity	molecular_function	10	LOC_Os08g41070	1	1155	70	26868	0.954031
GO:0009639	response to red or far red light	biological_process	7	LOC_Os04g28580	1	1155	72	26868	0.957909
GO:0034220	ion transmembrane transport	biological_process	7	LOC_Os02g57720	1	1155	73	26868	0.959723
GO:0051082	unfolded protein binding	molecular_function	5	LOC_Os05g01950	1	1155	74	26868	0.961459
GO:0003690	double-stranded DNA binding	molecular_function	7	LOC_Os05g34160	1	1155	75	26868	0.96312
GO:0010501	RNA secondary structure unwinding	biological_process	9	LOC_Os06g48750	1	1155	77	26868	0.966231
GO:0051603	proteolysis involved in cellular protein catabolic process	biological_process	8	LOC_Os11g27170;LOC_Os04g01710;LOC_Os05g18604	3	1155	158	26868	0.968353
GO:0003735	structural constituent of ribosome	molecular_function	4	LOC_Os07g10660;LOC_Os03g40180;LOC_Os07g42170;LOC_Os11g34940;LOC_Os11g05370;LOC_Os01g24690;LOC_Os05g03030;LOC_Os02g07890;LOC_Os01g04730;LOC_Os07g43310	10	1155	386	26868	0.971308
GO:0032508	DNA duplex unwinding	biological_process	9	LOC_Os08g41070	1	1155	81	26868	0.971689
GO:0000139	Golgi membrane	cellular_component	7	LOC_Os10g39950;LOC_Os09g27950;LOC_Os03g18820;LOC_Os03g19310;LOC_Os02g06380	5	1155	233	26868	0.973914
GO:0005764	lysosome	cellular_component	8	LOC_Os04g01710	1	1155	85	26868	0.976265
GO:0009793	embryo development ending in seed dormancy	biological_process	5	LOC_Os11g13930;LOC_Os03g06360;LOC_Os01g54600;LOC_Os06g19530;LOC_Os05g50710;LOC_Os02g14480;LOC_Os01g21250	7	1155	308	26868	0.980088
GO:0003729	mRNA binding	molecular_function	7	LOC_Os05g43390	1	1155	93	26868	0.98332
GO:0006281	DNA repair	biological_process	8	LOC_Os08g41070;LOC_Os07g45070;LOC_Os07g45074	3	1155	177	26868	0.983324
GO:0006886	intracellular protein transport	biological_process	10	LOC_Os06g07200;LOC_Os07g33660;LOC_Os01g47730	3	1155	179	26868	0.984429
GO:0009908	flower development	biological_process	6	LOC_Os06g14406;LOC_Os02g01355	2	1155	142	26868	0.985776
GO:0022627	cytosolic small ribosomal subunit	cellular_component	8	LOC_Os07g10660	1	1155	97	26868	0.986017
GO:0004197	cysteine-type endopeptidase activity	molecular_function	8	LOC_Os04g01710	1	1155	103	26868	0.989268
GO:0005730	nucleolus	cellular_component	6	LOC_Os11g47760;LOC_Os03g06360;LOC_Os03g57560;LOC_Os05g51850;LOC_Os04g38900	5	1155	268	26868	0.990806
GO:0018171	peptidyl-cysteine oxidation	biological_process	10	LOC_Os09g14700	1	1155	108	26868	0.991393
GO:0009061	anaerobic respiration	biological_process	8	LOC_Os09g14700	1	1155	108	26868	0.991393
GO:0070483	detection of hypoxia	biological_process	6	LOC_Os09g14700	1	1155	110	26868	0.99212
GO:0016192	vesicle-mediated transport	biological_process	6	LOC_Os09g39960	1	1155	122	26868	0.99536
GO:0005783	endoplasmic reticulum	cellular_component	6	LOC_Os03g60509;LOC_Os01g05744;LOC_Os07g42250;LOC_Os06g15170;LOC_Os11g44940;LOC_Os03g58790;LOC_Os12g24320;LOC_Os06g30950;LOC_Os10g39710;LOC_Os06g48250;LOC_Os03g14000;LOC_Os06g19530;LOC_Os08g34240	13	1155	570	26868	0.996713
GO:0006412	translation	biological_process	8	LOC_Os07g43310;LOC_Os05g03030;LOC_Os07g10660;LOC_Os01g24690;LOC_Os11g34940	5	1155	310	26868	0.997559
GO:0016929	SUMO-specific protease activity	molecular_function	9	LOC_Os10g24954	1	1155	152	26868	0.998767
GO:0016926	protein desumoylation	biological_process	11	LOC_Os10g24954	1	1155	155	26868	0.99892
GO:0003676	nucleic acid binding	molecular_function	5	LOC_Os09g23690;LOC_Os05g37190;LOC_Os05g45020;LOC_Os03g50560;LOC_Os03g49170	5	1155	348	26868	0.999305
GO:0071013	catalytic step 2 spliceosome	cellular_component	7	LOC_Os02g14780	1	1155	166	26868	0.999336
GO:0004175	endopeptidase activity	molecular_function	7	LOC_Os10g24954	1	1155	166	26868	0.999336
GO:0004252	serine-type endopeptidase activity	molecular_function	8	LOC_Os10g33140;LOC_Os10g37760;LOC_Os04g03810	3	1155	272	26868	0.999459
GO:0015031	protein transport	biological_process	9	LOC_Os03g15230;LOC_Os08g07830	2	1155	229	26868	0.999535
GO:0000166	nucleotide binding	molecular_function	5	LOC_Os11g12320;LOC_Os06g48520;LOC_Os08g42700;LOC_Os10g31864;LOC_Os02g35200;LOC_Os03g50560	6	1155	406	26868	0.999632
GO:0006511	ubiquitin-dependent protein catabolic process	biological_process	10	LOC_Os02g06640	1	1155	181	26868	0.999658
GO:0031146	SCF-dependent proteasomal ubiquitin-dependent protein catabolic process	biological_process	12	LOC_Os05g08010;LOC_Os07g02910;LOC_Os01g45020	3	1155	329	26868	0.999939
GO:0009536	plastid	cellular_component	6	LOC_Os01g64120;LOC_Os05g35580;LOC_Os04g32560;LOC_Os09g36982;LOC_Os02g09940	5	1155	435	26868	0.999966
GO:0019005	SCF ubiquitin ligase complex	cellular_component	7	LOC_Os05g08010;LOC_Os07g02910;LOC_Os01g45020	3	1155	367	26868	0.999986
GO:0005739	mitochondrion	cellular_component	6	LOC_Os04g38900;LOC_Os02g35610;LOC_Os01g69870;LOC_Os02g33070;LOC_Os11g06590;LOC_Os04g32560;LOC_Os03g03200;LOC_Os08g01120;LOC_Os04g02910;LOC_Os01g21250;LOC_Os07g34570;LOC_Os06g50870;LOC_Os01g53910;LOC_Os08g04630;LOC_Os01g48570;LOC_Os03g03790;LOC_Os03g15230;LOC_Os01g11860;LOC_Os07g17330;LOC_Os10g17454;LOC_Os01g63690;LOC_Os05g38530;LOC_Os12g31860;LOC_Os07g46852;LOC_Os02g54870;LOC_Os06g23210;LOC_Os03g…	45	1155	1813	26868	0.999992
GO:0003755	peptidyl-prolyl cis-trans isomerase activity	molecular_function	6	LOC_Os06g45340;LOC_Os03g50080;LOC_Os01g38229;LOC_Os01g02080	4	1155	433	26868	0.999993
GO:0005528	FK506 binding	molecular_function	6	LOC_Os06g45340;LOC_Os03g50080;LOC_Os01g38229	3	1155	399	26868	0.999996
GO:0061077	chaperone-mediated protein folding	biological_process	5	LOC_Os03g50080;LOC_Os01g38229;LOC_Os06g45340	3	1155	408	26868	0.999997
GO:0030048	actin filament-based movement	biological_process	5	LOC_Os01g51634;LOC_Os06g29350	2	1155	396	26868	1
GO:0003723	RNA binding	molecular_function	6	LOC_Os02g14780;LOC_Os09g36680;LOC_Os10g17454;LOC_Os09g36700	4	1155	530	26868	1
GO:0006897	endocytosis	biological_process	7	LOC_Os04g57350;LOC_Os02g55970	2	1155	449	26868	1
GO:0005789	endoplasmic reticulum membrane	cellular_component	5	LOC_Os06g19530;LOC_Os06g15170;LOC_Os06g45340;LOC_Os03g50080;LOC_Os03g14000;LOC_Os01g38229	6	1155	672	26868	1
GO:0051015	actin filament binding	molecular_function	7	LOC_Os06g13030	1	1155	420	26868	1

## Sheet: Table S3-2
Table S3-2 GO enrichment analysis of R0_R3-up DEGs.
GO_ID	GO_Term	GO_function	GO_class	Genes	S gene number	TS gene number	B gene number	TB gene number	pvalue
GO:0009611	response to wounding	biological_process	5	LOC_Os06g11860;LOC_Os01g09800;LOC_Os02g48770;LOC_Os03g60080;LOC_Os05g35290;LOC_Os12g36240;LOC_Os01g37590;LOC_Os04g43800;LOC_Os06g20960;LOC_Os05g37250;LOC_Os10g25290;LOC_Os03g08320;LOC_Os12g36220;LOC_Os04g37430;LOC_Os08g33160;LOC_Os03g17700;LOC_Os03g28940;LOC_Os01g63930;LOC_Os08g39850;LOC_Os07g42370;LOC_Os01g60020	21	428	228	26868	1.31277e-10
GO:0010200	response to chitin	biological_process	7	LOC_Os10g41330;LOC_Os04g43680;LOC_Os03g17700;LOC_Os04g34140;LOC_Os05g25770;LOC_Os04g21950;LOC_Os01g61080;LOC_Os01g14440;LOC_Os05g27730;LOC_Os03g04070;LOC_Os09g16510;LOC_Os01g53920;LOC_Os02g45710	13	428	107	26868	1.65669e-08
GO:1903507	negative regulation of nucleic acid-templated transcription	biological_process	10	LOC_Os03g28940;LOC_Os03g08320;LOC_Os08g33160;LOC_Os07g02800;LOC_Os10g25290;LOC_Os07g42370	6	428	21	26868	6.99134e-07
GO:0046658	anchored component of plasma membrane	cellular_component	6	LOC_Os01g71350;LOC_Os02g44670;LOC_Os03g55120;LOC_Os08g37670;LOC_Os05g31140;LOC_Os01g71340;LOC_Os03g50140;LOC_Os12g06220;LOC_Os08g14700;LOC_Os01g71670;LOC_Os03g45390;LOC_Os09g39940;LOC_Os04g33640;LOC_Os07g35510;LOC_Os10g35460;LOC_Os09g38540	16	428	237	26868	1.48546e-06
GO:0009414	response to water deprivation	biological_process	5	LOC_Os05g31750;LOC_Os05g27730;LOC_Os03g11550;LOC_Os03g23010;LOC_Os09g31200;LOC_Os03g06360;LOC_Os06g11860;LOC_Os08g05910;LOC_Os03g44380;LOC_Os01g28500;LOC_Os05g31760;LOC_Os12g03290;LOC_Os03g13840;LOC_Os04g52090;LOC_Os01g61080	15	428	235	26868	6.24265e-06
GO:2000022	regulation of jasmonic acid mediated signaling pathway	biological_process	8	LOC_Os10g25290;LOC_Os01g09800;LOC_Os07g42370;LOC_Os03g08320;LOC_Os03g28940;LOC_Os08g33160	6	428	33	26868	1.21379e-05
GO:0006979	response to oxidative stress	biological_process	5	LOC_Os04g43800;LOC_Os05g35290;LOC_Os01g63690;LOC_Os09g20390;LOC_Os04g41960;LOC_Os03g13210;LOC_Os01g53730;LOC_Os12g36870;LOC_Os05g44900;LOC_Os03g17700;LOC_Os12g26290;LOC_Os02g45930;LOC_Os04g49370	13	428	194	26868	1.54027e-05
GO:0003700	DNA-binding transcription factor activity	molecular_function	4	LOC_Os01g60020;LOC_Os08g38220;LOC_Os02g40530;LOC_Os05g27730;LOC_Os04g45330;LOC_Os09g16510;LOC_Os03g04070;LOC_Os04g52090;LOC_Os02g08440;LOC_Os06g13030;LOC_Os01g50940;LOC_Os05g41780;LOC_Os03g49170;LOC_Os05g03760;LOC_Os09g28200;LOC_Os01g46870;LOC_Os10g41330;LOC_Os01g49830;LOC_Os04g43680;LOC_Os03g08500;LOC_Os05g45020;LOC_Os11g29870;LOC_Os07g02800;LOC_Os03g55590;LOC_Os06g11860;LOC_Os01g61080;LOC_Os11g…	42	428	1353	26868	3.12984e-05
GO:0003714	transcription corepressor activity	molecular_function	5	LOC_Os08g33160;LOC_Os03g08320;LOC_Os10g25290;LOC_Os07g42370;LOC_Os03g28940	5	428	27	26868	6.05794e-05
GO:0031347	regulation of defense response	biological_process	7	LOC_Os08g33160;LOC_Os07g42370;LOC_Os03g28940;LOC_Os09g16510;LOC_Os03g08320;LOC_Os10g25290;LOC_Os05g25770	7	428	63	26868	6.35798e-05
GO:0010120	camalexin biosynthetic process	biological_process	9	LOC_Os05g27730;LOC_Os03g17700;LOC_Os01g61080	3	428	8	26868	0.000211804
GO:0050832	defense response to fungus	biological_process	8	LOC_Os01g53920;LOC_Os10g39680;LOC_Os03g58580;LOC_Os06g51060;LOC_Os12g26290;LOC_Os05g46020;LOC_Os05g25770;LOC_Os01g09800;LOC_Os05g27730;LOC_Os04g58710;LOC_Os01g61080	11	428	190	26868	0.000250942
GO:0008061	chitin binding	molecular_function	5	LOC_Os10g28120;LOC_Os10g28080;LOC_Os02g45750;LOC_Os06g25010;LOC_Os10g39680;LOC_Os05g15770	6	428	60	26868	0.000381982
GO:0030247	polysaccharide binding	molecular_function	5	LOC_Os01g71350;LOC_Os07g35510;LOC_Os01g71340;LOC_Os08g14700;LOC_Os03g45390;LOC_Os01g71670;LOC_Os04g33640;LOC_Os05g31140	8	428	110	26868	0.000386333
GO:0004568	chitinase activity	molecular_function	7	LOC_Os10g39680;LOC_Os10g28120;LOC_Os06g51060;LOC_Os05g15770;LOC_Os06g25010;LOC_Os10g28080	6	428	62	26868	0.000456683
GO:0004553	hydrolase activity, hydrolyzing O-glycosyl compounds	molecular_function	6	LOC_Os07g35510;LOC_Os08g14700;LOC_Os01g71670;LOC_Os01g71340;LOC_Os03g45390;LOC_Os04g33640;LOC_Os01g71350;LOC_Os05g31140;LOC_Os11g33270;LOC_Os09g23220	10	428	184	26868	0.00077608
GO:0004805	trehalose-phosphatase activity	molecular_function	9	LOC_Os02g54820;LOC_Os08g34580;LOC_Os09g20390;LOC_Os08g31980	4	428	28	26868	0.000960265
GO:0003825	alpha,alpha-trehalose-phosphate synthase (UDP-forming) activity	molecular_function	8	LOC_Os08g34580;LOC_Os02g54820;LOC_Os08g31980	3	428	14	26868	0.00128212
GO:0009620	response to fungus	biological_process	7	LOC_Os04g46220;LOC_Os04g37430;LOC_Os03g60080;LOC_Os03g18770;LOC_Os11g45740	5	428	52	26868	0.00140759
GO:0031408	oxylipin biosynthetic process	biological_process	11	LOC_Os02g48770;LOC_Os04g37430;LOC_Os06g20960;LOC_Os12g26290	4	428	31	26868	0.0014212
GO:0005992	trehalose biosynthetic process	biological_process	9	LOC_Os09g20390;LOC_Os08g31980;LOC_Os08g34580;LOC_Os02g54820	4	428	32	26868	0.00160401
GO:0006950	response to stress	biological_process	4	LOC_Os05g42230;LOC_Os01g04280;LOC_Os03g19270;LOC_Os12g36910;LOC_Os12g36110	5	428	57	26868	0.00212538
GO:0009627	systemic acquired resistance	biological_process	7	LOC_Os12g26290;LOC_Os01g28500;LOC_Os01g09800	3	428	20	26868	0.00374077
GO:0009505	plant-type cell wall	cellular_component	6	LOC_Os09g39760;LOC_Os03g36560;LOC_Os04g59190;LOC_Os08g37840;LOC_Os10g39640;LOC_Os10g35460;LOC_Os01g57730;LOC_Os04g59150;LOC_Os07g38130;LOC_Os02g52010;LOC_Os04g59260	11	428	271	26868	0.00437455
GO:0080086	stamen filament development	biological_process	5	LOC_Os09g23220;LOC_Os04g37430	2	428	7	26868	0.0050422
GO:0010226	response to lithium ion	biological_process	7	LOC_Os03g06360;LOC_Os06g50950	2	428	7	26868	0.0050422
GO:0010508	positive regulation of autophagy	biological_process	9	LOC_Os05g27730;LOC_Os01g61080	2	428	7	26868	0.0050422
GO:0004834	tryptophan synthase activity	molecular_function	7	LOC_Os03g58300;LOC_Os03g58290	2	428	7	26868	0.0050422
GO:0009751	response to salicylic acid	biological_process	6	LOC_Os03g60080;LOC_Os01g47760;LOC_Os09g16510;LOC_Os08g38220;LOC_Os05g25770;LOC_Os06g50950;LOC_Os01g63690;LOC_Os12g26290	8	428	166	26868	0.00528155
GO:0006032	chitin catabolic process	biological_process	8	LOC_Os05g15770;LOC_Os10g28080;LOC_Os06g25010;LOC_Os10g28120	4	428	46	26868	0.0061126
GO:0009986	cell surface	cellular_component	4	LOC_Os05g31760;LOC_Os05g31750	2	428	8	26868	0.00665234
GO:0032260	response to jasmonic acid stimulus involved in jasmonic acid and ethylene-dependent systemic resistance	biological_process	7	LOC_Os12g36240;LOC_Os12g36220	2	428	8	26868	0.00665234
GO:0009409	response to cold	biological_process	5	LOC_Os05g31750;LOC_Os03g13840;LOC_Os05g31760;LOC_Os06g11860;LOC_Os01g61080;LOC_Os02g11070;LOC_Os05g27730;LOC_Os04g51150;LOC_Os03g17700;LOC_Os10g41550	10	428	250	26868	0.00710523
GO:0005516	calmodulin binding	molecular_function	5	LOC_Os08g02250;LOC_Os12g36910;LOC_Os08g27720;LOC_Os01g38980;LOC_Os03g13300;LOC_Os01g04280;LOC_Os12g36110;LOC_Os04g21950	8	428	180	26868	0.00846098
GO:0016161	beta-amylase activity	molecular_function	8	LOC_Os10g41550;LOC_Os03g22790	2	428	9	26868	0.00846331
GO:0018685	alkane 1-monooxygenase activity	molecular_function	7	LOC_Os01g63930;LOC_Os05g37250	2	428	9	26868	0.00846331
GO:0009867	jasmonic acid mediated signaling pathway	biological_process	6	LOC_Os06g20960;LOC_Os01g47760;LOC_Os02g48770;LOC_Os05g46020	4	428	51	26868	0.00879779
GO:0051707	response to other organism	biological_process	6	LOC_Os08g39850;LOC_Os12g26290;LOC_Os10g05660;LOC_Os12g38150	4	428	52	26868	0.00941364
GO:0016125	sterol metabolic process	biological_process	7	LOC_Os02g47470;LOC_Os03g12500;LOC_Os03g55800;LOC_Os08g36860	4	428	52	26868	0.00941364
GO:0000786	nucleosome	cellular_component	5	LOC_Os01g61920;LOC_Os11g05730;LOC_Os06g06480	3	428	28	26868	0.00978608
GO:0030170	pyridoxal phosphate binding	molecular_function	6	LOC_Os03g58300;LOC_Os06g07860;LOC_Os03g13300;LOC_Os06g36880;LOC_Os03g58290;LOC_Os10g37340	6	428	114	26868	0.00995293
GO:0009800	cinnamic acid biosynthetic process	biological_process	8	LOC_Os04g43800;LOC_Os05g35290	2	428	10	26868	0.0104683
GO:0045548	phenylalanine ammonia-lyase activity	molecular_function	7	LOC_Os05g35290;LOC_Os04g43800	2	428	10	26868	0.0104683
GO:0046244	salicylic acid catabolic process	biological_process	8	LOC_Os05g35290;LOC_Os04g43800	2	428	10	26868	0.0104683
GO:0046274	lignin catabolic process	biological_process	8	LOC_Os05g35290;LOC_Os04g43800	2	428	10	26868	0.0104683
GO:0009753	response to jasmonic acid	biological_process	6	LOC_Os03g60080;LOC_Os01g37590;LOC_Os04g37430;LOC_Os04g43680;LOC_Os11g45740;LOC_Os05g25770	6	428	116	26868	0.0107868
GO:0009651	response to salt stress	biological_process	6	LOC_Os05g27730;LOC_Os09g20390;LOC_Os12g03290;LOC_Os06g11860;LOC_Os11g45740;LOC_Os05g31760;LOC_Os03g13840;LOC_Os02g01510;LOC_Os04g43680;LOC_Os05g31750;LOC_Os01g61080;LOC_Os10g35460	12	428	351	26868	0.0111572
GO:0006970	response to osmotic stress	biological_process	5	LOC_Os06g11860;LOC_Os09g20390;LOC_Os03g44380;LOC_Os01g61080;LOC_Os03g17700;LOC_Os03g06360;LOC_Os05g31750;LOC_Os05g27730	8	428	190	26868	0.0114855
GO:0005544	calcium-dependent phospholipid binding	molecular_function	6	LOC_Os05g31760;LOC_Os01g62430;LOC_Os05g31750	3	428	30	26868	0.0118477
GO:0070370	cellular heat acclimation	biological_process	7	LOC_Os05g27730;LOC_Os01g61080	2	428	11	26868	0.0126608
GO:0016607	nuclear speck	cellular_component	8	LOC_Os05g44900;LOC_Os01g53730;LOC_Os04g49370;LOC_Os02g45930	4	428	57	26868	0.012912
GO:0005634	nucleus	cellular_component	6	LOC_Os01g49830;LOC_Os03g06390;LOC_Os06g06490;LOC_Os09g04160;LOC_Os03g13210;LOC_Os08g36570;LOC_Os01g60640;LOC_Os01g54210;LOC_Os03g06850;LOC_Os12g36910;LOC_Os09g28200;LOC_Os09g33550;LOC_Os08g34580;LOC_Os09g31200;LOC_Os01g54340;LOC_Os01g04280;LOC_Os05g08420;LOC_Os06g11860;LOC_Os04g49370;LOC_Os03g04070;LOC_Os01g69270;LOC_Os05g27730;LOC_Os08g33160;LOC_Os01g40070;LOC_Os02g11070;LOC_Os10g41330;LOC_Os02g…	130	428	6869	26868	0.0135283
GO:0005576	extracellular region	cellular_component	3	LOC_Os09g39760;LOC_Os07g38130;LOC_Os11g33270;LOC_Os02g51710;LOC_Os07g37700;LOC_Os08g02094;LOC_Os10g28080;LOC_Os09g23220;LOC_Os04g54830;LOC_Os01g66760;LOC_Os05g15770;LOC_Os10g05660;LOC_Os06g25010;LOC_Os02g57110;LOC_Os01g11750;LOC_Os02g52010;LOC_Os03g21820;LOC_Os12g38150;LOC_Os06g50950;LOC_Os05g37250;LOC_Os01g28500;LOC_Os10g28120;LOC_Os09g25760;LOC_Os10g26940;LOC_Os01g63930;LOC_Os01g68500;LOC_Os12g…	32	428	1338	26868	0.0150138
GO:0009862	systemic acquired resistance, salicylic acid mediated signaling pathway	biological_process	6	LOC_Os05g25770;LOC_Os01g09800	2	428	12	26868	0.0150343
GO:0003959	NADPH dehydrogenase activity	molecular_function	6	LOC_Os01g27230;LOC_Os06g11210	2	428	12	26868	0.0150343
GO:0030795	jasmonate O-methyltransferase activity	molecular_function	8	LOC_Os06g20960;LOC_Os02g48770	2	428	12	26868	0.0150343
GO:0016747	transferase activity, transferring acyl groups other than amino-acyl groups	molecular_function	6	LOC_Os09g34930;LOC_Os03g53360;LOC_Os02g11070;LOC_Os05g37660;LOC_Os01g63480;LOC_Os10g35950	6	428	125	26868	0.0151568
GO:0006952	defense response	biological_process	5	LOC_Os11g45740;LOC_Os07g35390;LOC_Os01g28500;LOC_Os09g25070;LOC_Os12g06220;LOC_Os11g12320;LOC_Os01g53920;LOC_Os04g43440;LOC_Os07g35370;LOC_Os02g08440;LOC_Os03g16950;LOC_Os12g17430;LOC_Os05g35290;LOC_Os09g24330;LOC_Os07g38130;LOC_Os04g52090;LOC_Os01g03690;LOC_Os02g18070;LOC_Os02g44670;LOC_Os04g37430;LOC_Os04g43800;LOC_Os11g11960	22	428	835	26868	0.0153919
GO:0000169	activation of MAPK activity involved in osmosensory signaling pathway	biological_process	14	LOC_Os03g17700	1	428	1	26868	0.0159297
GO:0006226	dUMP biosynthetic process	biological_process	12	LOC_Os03g46640	1	428	1	26868	0.0159297
GO:0009671	nitrate:proton symporter activity	molecular_function	11	LOC_Os12g25200	1	428	1	26868	0.0159297
GO:0018826	methionine gamma-lyase activity	molecular_function	6	LOC_Os10g37340	1	428	1	26868	0.0159297
GO:0001561	fatty acid alpha-oxidation	biological_process	11	LOC_Os12g26290	1	428	1	26868	0.0159297
GO:0042906	xanthine transport	biological_process	9	LOC_Os12g31860	1	428	1	26868	0.0159297
GO:0000024	maltose biosynthetic process	biological_process	9	LOC_Os10g41550	1	428	1	26868	0.0159297
GO:0019458	methionine catabolic process via 2-oxobutanoate	biological_process	12	LOC_Os10g37340	1	428	1	26868	0.0159297
GO:0010055	atrichoblast differentiation	biological_process	8	LOC_Os11g29870	1	428	1	26868	0.0159297
GO:0032440	2-alkenal reductase [NAD(P)] activity	molecular_function	7	LOC_Os04g41960	1	428	1	26868	0.0159297
GO:0046081	dUTP catabolic process	biological_process	12	LOC_Os03g46640	1	428	1	26868	0.0159297
GO:0050203	oxalate-CoA ligase activity	molecular_function	7	LOC_Os04g58710	1	428	1	26868	0.0159297
GO:0009687	abscisic acid metabolic process	biological_process	10	LOC_Os02g47470	1	428	1	26868	0.0159297
GO:0034614	cellular response to reactive oxygen species	biological_process	7	LOC_Os12g26290	1	428	1	26868	0.0159297
GO:0071901	negative regulation of protein serine/threonine kinase activity	biological_process	12	LOC_Os03g01740	1	428	1	26868	0.0159297
GO:0032107	regulation of response to nutrient levels	biological_process	8	LOC_Os11g29870	1	428	1	26868	0.0159297
GO:0033611	oxalate catabolic process	biological_process	10	LOC_Os04g58710	1	428	1	26868	0.0159297
GO:0015927	trehalase activity	molecular_function	7	LOC_Os09g20390	1	428	1	26868	0.0159297
GO:0046109	uridine biosynthetic process	biological_process	12	LOC_Os04g24140	1	428	1	26868	0.0159297
GO:0042907	xanthine transmembrane transporter activity	molecular_function	7	LOC_Os12g31860	1	428	1	26868	0.0159297
GO:0004170	dUTP diphosphatase activity	molecular_function	9	LOC_Os03g46640	1	428	1	26868	0.0159297
GO:0005509	calcium ion binding	molecular_function	7	LOC_Os05g13580;LOC_Os01g70820;LOC_Os05g31750;LOC_Os05g31760;LOC_Os03g21380;LOC_Os01g62430;LOC_Os07g43800;LOC_Os06g46950	8	428	204	26868	0.016968
GO:0005515	protein binding	molecular_function	4	LOC_Os11g12320;LOC_Os03g17700;LOC_Os03g23010;LOC_Os03g06390;LOC_Os10g31780;LOC_Os05g27730;LOC_Os12g43450;LOC_Os03g41100;LOC_Os06g50930;LOC_Os10g33040;LOC_Os08g27720;LOC_Os07g41160;LOC_Os09g27010;LOC_Os03g47140;LOC_Os01g46870;LOC_Os04g43800;LOC_Os05g45020;LOC_Os01g09800;LOC_Os06g11860;LOC_Os04g52090;LOC_Os01g14440;LOC_Os03g19310;LOC_Os03g52320;LOC_Os11g02240;LOC_Os06g10160;LOC_Os03g60080;LOC_Os08g…	49	428	2259	26868	0.0169985
GO:0043565	sequence-specific DNA binding	molecular_function	7	LOC_Os01g61080;LOC_Os09g28200;LOC_Os03g55540;LOC_Os07g02800;LOC_Os04g52090;LOC_Os06g11860;LOC_Os05g27730;LOC_Os04g21950;LOC_Os05g46020;LOC_Os05g25770;LOC_Os01g60640;LOC_Os01g14440;LOC_Os09g16510	13	428	417	26868	0.0170708
GO:0016740	transferase activity	molecular_function	4	LOC_Os01g63480;LOC_Os02g56970;LOC_Os05g37660;LOC_Os03g38540;LOC_Os03g53360;LOC_Os03g19310;LOC_Os12g24020	7	428	168	26868	0.018439
GO:0010411	xyloglucan metabolic process	biological_process	9	LOC_Os11g33270;LOC_Os03g19310;LOC_Os09g23220	3	428	36	26868	0.0194288
GO:0048046	apoplast	cellular_component	4	LOC_Os10g26940;LOC_Os11g33270;LOC_Os04g15920;LOC_Os09g23220;LOC_Os01g28500;LOC_Os05g50710;LOC_Os04g58710;LOC_Os02g52010;LOC_Os08g37840	9	428	251	26868	0.0198296
GO:0006873	cellular ion homeostasis	biological_process	8	LOC_Os05g13320;LOC_Os03g06360	2	428	14	26868	0.0202991
GO:0006541	glutamine metabolic process	biological_process	11	LOC_Os04g58280;LOC_Os05g35580	2	428	14	26868	0.0202991
GO:0003677	DNA binding	molecular_function	6	LOC_Os11g05730;LOC_Os03g49170;LOC_Os01g60640;LOC_Os05g45020;LOC_Os04g52090;LOC_Os03g55590;LOC_Os11g13930;LOC_Os12g03290;LOC_Os09g16510;LOC_Os09g31200;LOC_Os02g40530;LOC_Os09g28200;LOC_Os01g50940;LOC_Os04g45330;LOC_Os06g11860;LOC_Os01g49830;LOC_Os01g46870;LOC_Os04g43680;LOC_Os08g38220;LOC_Os02g48320;LOC_Os01g61920;LOC_Os03g04070;LOC_Os11g45740;LOC_Os01g60020;LOC_Os03g60080;LOC_Os02g03030;LOC_Os01g…	33	428	1432	26868	0.0220562
GO:0009695	jasmonic acid biosynthetic process	biological_process	10	LOC_Os06g20960;LOC_Os02g48770;LOC_Os04g37430	3	428	38	26868	0.0224285
GO:0009737	response to abscisic acid	biological_process	6	LOC_Os12g02400;LOC_Os11g45740;LOC_Os12g26290;LOC_Os12g03290;LOC_Os05g31750;LOC_Os11g02540;LOC_Os03g06360;LOC_Os02g01510;LOC_Os03g11550;LOC_Os04g52090;LOC_Os03g14370	11	428	345	26868	0.0233104
GO:0009873	ethylene-activated signaling pathway	biological_process	7	LOC_Os01g46870;LOC_Os01g14440;LOC_Os04g52090;LOC_Os06g11860;LOC_Os12g03290;LOC_Os10g41330;LOC_Os01g49830	7	428	178	26868	0.0243824
GO:0008152	metabolic process	biological_process	3	LOC_Os03g38540;LOC_Os03g15270;LOC_Os07g41590;LOC_Os03g14370;LOC_Os09g28230;LOC_Os08g42080	6	428	140	26868	0.024932
GO:0005737	cytoplasm	cellular_component	5	LOC_Os05g35290;LOC_Os03g17700;LOC_Os05g34150;LOC_Os01g09800;LOC_Os03g46640;LOC_Os07g04990;LOC_Os10g37340;LOC_Os03g22790;LOC_Os04g41960;LOC_Os12g12580;LOC_Os02g35200;LOC_Os01g63690;LOC_Os03g12390;LOC_Os04g58710;LOC_Os01g27210;LOC_Os04g41280;LOC_Os03g23010;LOC_Os12g24020;LOC_Os03g49170;LOC_Os04g34140;LOC_Os02g44820;LOC_Os02g48770;LOC_Os10g35950;LOC_Os04g30420;LOC_Os09g20390;LOC_Os03g58290;LOC_Os06g…	68	428	3380	26868	0.0250472
GO:0046914	transition metal ion binding	molecular_function	7	LOC_Os04g39350;LOC_Os04g49260;LOC_Os04g57200;LOC_Os02g37330;LOC_Os02g37300	5	428	104	26868	0.0255552
GO:0046916	cellular transition metal ion homeostasis	biological_process	11	LOC_Os04g49260;LOC_Os02g37300;LOC_Os04g39350;LOC_Os04g57200;LOC_Os02g37330	5	428	104	26868	0.0255552
GO:0015293	symporter activity	molecular_function	7	LOC_Os08g05910;LOC_Os01g37590	2	428	16	26868	0.0262144
GO:0005355	glucose transmembrane transporter activity	molecular_function	9	LOC_Os04g43210;LOC_Os03g11900;LOC_Os07g37320;LOC_Os07g39350	4	428	71	26868	0.0267404
GO:0046323	glucose import	biological_process	12	LOC_Os03g11900;LOC_Os04g43210;LOC_Os07g39350;LOC_Os07g37320	4	428	71	26868	0.0267404
GO:0004601	peroxidase activity	molecular_function	4	LOC_Os04g59260;LOC_Os04g59190;LOC_Os03g36560;LOC_Os12g26290;LOC_Os03g13210;LOC_Os04g59150;LOC_Os01g57730	7	428	182	26868	0.0270905
GO:0009408	response to heat	biological_process	5	LOC_Os05g31750;LOC_Os01g61080;LOC_Os01g09800;LOC_Os05g31760;LOC_Os05g27730;LOC_Os03g15960	6	428	145	26868	0.0289503
GO:0009685	gibberellin metabolic process	biological_process	10	LOC_Os09g25070;LOC_Os02g08440	2	428	17	26868	0.0294015
GO:0000162	tryptophan biosynthetic process	biological_process	11	LOC_Os03g58300;LOC_Os03g58290	2	428	17	26868	0.0294015
GO:0009506	plasmodesma	cellular_component	5	LOC_Os01g03690;LOC_Os03g16950;LOC_Os07g38130;LOC_Os03g58580;LOC_Os01g61920;LOC_Os08g37840;LOC_Os05g31750;LOC_Os09g24330;LOC_Os10g39640;LOC_Os07g35370;LOC_Os07g35390;LOC_Os02g44670;LOC_Os10g33040;LOC_Os12g36870;LOC_Os12g06220;LOC_Os04g34140;LOC_Os08g43190;LOC_Os08g36570;LOC_Os09g25760;LOC_Os04g58710	20	428	791	26868	0.0295777
GO:0009664	plant-type cell wall organization	biological_process	7	LOC_Os04g59190;LOC_Os04g59260;LOC_Os04g59150;LOC_Os01g57730;LOC_Os03g36560;LOC_Os03g21820	6	428	147	26868	0.03067
GO:0010295	(+)-abscisic acid 8'-hydroxylase activity	molecular_function	7	LOC_Os08g36860	1	428	2	26868	0.0316063
GO:0000389	mRNA 3'-splice site recognition	biological_process	10	LOC_Os02g14780	1	428	2	26868	0.0316063
GO:0004121	cystathionine beta-lyase activity	molecular_function	6	LOC_Os06g07860	1	428	2	26868	0.0316063
GO:0030366	molybdopterin synthase activity	molecular_function	7	LOC_Os02g35200	1	428	2	26868	0.0316063
GO:0043620	regulation of DNA-templated transcription in response to stress	biological_process	9	LOC_Os11g29870	1	428	2	26868	0.0316063
GO:0052865	1-deoxy-D-xylulose 5-phosphate biosynthetic process	biological_process	8	LOC_Os07g09190	1	428	2	26868	0.0316063
GO:0034440	lipid oxidation	biological_process	8	LOC_Os04g37430	1	428	2	26868	0.0316063
GO:2000037	regulation of stomatal complex patterning	biological_process	7	LOC_Os03g17700	1	428	2	26868	0.0316063
GO:0009970	cellular response to sulfate starvation	biological_process	9	LOC_Os10g37340	1	428	2	26868	0.0316063
GO:0045792	negative regulation of cell size	biological_process	7	LOC_Os03g04070	1	428	2	26868	0.0316063
GO:0004457	lactate dehydrogenase activity	molecular_function	6	LOC_Os02g01510	1	428	2	26868	0.0316063
GO:0005253	anion channel activity	molecular_function	7	LOC_Os12g25200	1	428	2	26868	0.0316063
GO:0046030	inositol trisphosphate phosphatase activity	molecular_function	9	LOC_Os01g08780	1	428	2	26868	0.0316063
GO:0045263	proton-transporting ATP synthase complex, coupling factor F(o)	cellular_component	6	LOC_Os03g17070	1	428	2	26868	0.0316063
GO:0019279	L-methionine biosynthetic process from L-homoserine via cystathionine	biological_process	12	LOC_Os06g07860	1	428	2	26868	0.0316063
GO:0080169	cellular response to boron-containing substance deprivation	biological_process	9	LOC_Os01g14440	1	428	2	26868	0.0316063
GO:0047974	guanosine deaminase activity	molecular_function	7	LOC_Os07g14150	1	428	2	26868	0.0316063
GO:0004459	L-lactate dehydrogenase activity	molecular_function	7	LOC_Os02g01510	1	428	2	26868	0.0316063
GO:0080136	priming of cellular response to stress	biological_process	7	LOC_Os03g17700	1	428	2	26868	0.0316063
GO:0009694	jasmonic acid metabolic process	biological_process	9	LOC_Os06g20960;LOC_Os02g48770	2	428	18	26868	0.032734
GO:0051762	sesquiterpene biosynthetic process	biological_process	10	LOC_Os04g01810;LOC_Os04g27670	2	428	18	26868	0.032734
GO:0006351	transcription, DNA-templated	biological_process	8	LOC_Os04g52090;LOC_Os08g38220;LOC_Os01g14440;LOC_Os01g49830;LOC_Os06g11860;LOC_Os04g21950;LOC_Os02g48320;LOC_Os05g25770;LOC_Os01g43610;LOC_Os07g02800;LOC_Os01g60640;LOC_Os11g45740;LOC_Os01g50940;LOC_Os01g46870;LOC_Os05g46020;LOC_Os09g28200;LOC_Os03g04070;LOC_Os03g52320;LOC_Os11g29870;LOC_Os03g60080;LOC_Os03g47140;LOC_Os05g27730;LOC_Os03g55590;LOC_Os09g16510;LOC_Os10g41330;LOC_Os01g61080;LOC_Os11g…	28	428	1215	26868	0.0332544
GO:0016597	amino acid binding	molecular_function	7	LOC_Os03g14370;LOC_Os08g42080;LOC_Os07g29330	3	428	45	26868	0.0347926
GO:0030001	metal ion transport	biological_process	8	LOC_Os04g57200;LOC_Os04g49260;LOC_Os04g39350;LOC_Os02g37300;LOC_Os02g37330	5	428	113	26868	0.0348076
GO:0003333	amino acid transmembrane transport	biological_process	11	LOC_Os12g08090;LOC_Os01g61044;LOC_Os12g08130;LOC_Os04g47780	4	428	78	26868	0.0360411
GO:0006535	cysteine biosynthetic process from serine	biological_process	12	LOC_Os06g36880;LOC_Os01g52260	2	428	19	26868	0.0362065
GO:0009819	drought recovery	biological_process	6	LOC_Os04g43800;LOC_Os05g35290	2	428	20	26868	0.0398138
GO:0009901	anther dehiscence	biological_process	6	LOC_Os04g37430;LOC_Os02g03030	2	428	20	26868	0.0398138
GO:0042545	cell wall modification	biological_process	7	LOC_Os09g39760;LOC_Os08g38220	2	428	20	26868	0.0398138
GO:0006559	L-phenylalanine catabolic process	biological_process	11	LOC_Os05g35290;LOC_Os04g43800	2	428	20	26868	0.0398138
GO:0015171	amino acid transmembrane transporter activity	molecular_function	7	LOC_Os04g47780;LOC_Os12g08130;LOC_Os01g61044;LOC_Os12g08090	4	428	81	26868	0.0405303
GO:0009644	response to high light intensity	biological_process	8	LOC_Os03g13840;LOC_Os04g37430;LOC_Os03g23010	3	428	48	26868	0.0409684
GO:0000790	nuclear chromatin	cellular_component	7	LOC_Os08g33100;LOC_Os01g31800	2	428	21	26868	0.0435507
GO:0000977	RNA polymerase II regulatory region sequence-specific DNA binding	molecular_function	9	LOC_Os09g33882;LOC_Os03g06850;LOC_Os01g01870;LOC_Os01g54210	4	428	85	26868	0.0469875
GO:0004044	amidophosphoribosyltransferase activity	molecular_function	7	LOC_Os05g35580	1	428	3	26868	0.0470337
GO:0008661	1-deoxy-D-xylulose-5-phosphate synthase activity	molecular_function	6	LOC_Os07g09190	1	428	3	26868	0.0470337
GO:0019760	glucosinolate metabolic process	biological_process	8	LOC_Os02g08270	1	428	3	26868	0.0470337
GO:0015505	uracil:cation symporter activity	molecular_function	8	LOC_Os12g31860	1	428	3	26868	0.0470337
GO:0018315	molybdenum incorporation into molybdenum-molybdopterin complex	biological_process	10	LOC_Os02g35200	1	428	3	26868	0.0470337
GO:1902609	(R)-2-hydroxy-alpha-linolenic acid biosynthetic process	biological_process	12	LOC_Os12g26290	1	428	3	26868	0.0470337
GO:0019008	molybdopterin synthase complex	cellular_component	4	LOC_Os02g35200	1	428	3	26868	0.0470337
GO:0016838	carbon-oxygen lyase activity, acting on phosphates	molecular_function	6	LOC_Os04g01810	1	428	3	26868	0.0470337
GO:0043100	pyrimidine nucleobase salvage	biological_process	9	LOC_Os12g31860	1	428	3	26868	0.0470337
GO:0004751	ribose-5-phosphate isomerase activity	molecular_function	7	LOC_Os04g24140	1	428	3	26868	0.0470337
GO:0015857	uracil transport	biological_process	9	LOC_Os12g31860	1	428	3	26868	0.0470337
GO:0005542	folic acid binding	molecular_function	5	LOC_Os03g38540	1	428	3	26868	0.0470337
GO:0034602	oxoglutarate dehydrogenase (NAD+) activity	molecular_function	7	LOC_Os01g22520	1	428	3	26868	0.0470337
GO:0046976	histone methyltransferase activity (H3-K27 specific)	molecular_function	10	LOC_Os02g03030	1	428	3	26868	0.0470337
GO:0045787	positive regulation of cell cycle	biological_process	7	LOC_Os08g38220	1	428	3	26868	0.0470337
GO:0005274	allantoin:proton symporter activity	molecular_function	11	LOC_Os12g31860	1	428	3	26868	0.0470337
GO:0016119	carotene metabolic process	biological_process	9	LOC_Os03g03370	1	428	3	26868	0.0470337
GO:0010159	specification of animal organ position	biological_process	6	LOC_Os04g45330	1	428	3	26868	0.0470337
GO:0009916	alternative oxidase activity	molecular_function	7	LOC_Os04g51150	1	428	3	26868	0.0470337
GO:0052747	sinapyl alcohol dehydrogenase activity	molecular_function	7	LOC_Os04g15920	1	428	3	26868	0.0470337
GO:0015720	allantoin transport	biological_process	7	LOC_Os12g31860	1	428	3	26868	0.0470337
GO:0050266	rosmarinate synthase activity	molecular_function	7	LOC_Os09g25460	1	428	3	26868	0.0470337
GO:0031930	mitochondria-nucleus signaling pathway	biological_process	5	LOC_Os04g51150	1	428	3	26868	0.0470337
GO:0016166	phytoene dehydrogenase activity	molecular_function	6	LOC_Os08g39850	1	428	3	26868	0.0470337
GO:0080163	regulation of protein serine/threonine phosphatase activity	biological_process	12	LOC_Os12g36830;LOC_Os12g36880	2	428	22	26868	0.0474122
GO:0045551	cinnamyl-alcohol dehydrogenase activity	molecular_function	7	LOC_Os06g44170;LOC_Os04g15920	2	428	23	26868	0.0513934
GO:0052689	carboxylic ester hydrolase activity	molecular_function	6	LOC_Os07g41590;LOC_Os02g57110;LOC_Os09g28230;LOC_Os08g02094;LOC_Os01g11750;LOC_Os03g15270;LOC_Os06g50950	7	428	210	26868	0.0518471
GO:0080167	response to karrikin	biological_process	5	LOC_Os05g35290;LOC_Os04g24140;LOC_Os04g43800;LOC_Os12g36870	4	428	88	26868	0.0521831
GO:0046686	response to cadmium ion	biological_process	7	LOC_Os04g41960;LOC_Os05g44900;LOC_Os04g58710;LOC_Os03g13300;LOC_Os01g53730;LOC_Os04g49370;LOC_Os04g43680;LOC_Os02g45930	8	428	256	26868	0.0535662
GO:0004864	protein phosphatase inhibitor activity	molecular_function	7	LOC_Os12g36880;LOC_Os12g36830	2	428	24	26868	0.0554895
GO:0010427	abscisic acid binding	molecular_function	6	LOC_Os12g36880;LOC_Os12g36830	2	428	24	26868	0.0554895
GO:0005351	carbohydrate:proton symporter activity	molecular_function	7	LOC_Os04g43210;LOC_Os07g37320;LOC_Os03g11900;LOC_Os07g39350	4	428	90	26868	0.0558138
GO:0009407	toxin catabolic process	biological_process	6	LOC_Os09g29200;LOC_Os10g38780;LOC_Os05g34150	3	428	55	26868	0.0573511
GO:0051726	regulation of cell cycle	biological_process	6	LOC_Os03g41100;LOC_Os02g03030;LOC_Os09g29100	3	428	55	26868	0.0573511
GO:0009699	phenylpropanoid biosynthetic process	biological_process	7	LOC_Os04g43800;LOC_Os07g42520;LOC_Os10g14011;LOC_Os05g35290	4	428	92	26868	0.0595772
GO:0010183	pollen tube guidance	biological_process	4	LOC_Os10g33040;LOC_Os03g17700	2	428	25	26868	0.0596959
GO:0045892	negative regulation of transcription, DNA-templated	biological_process	9	LOC_Os01g43610;LOC_Os01g49830;LOC_Os05g25770;LOC_Os04g52090;LOC_Os01g14440	5	428	133	26868	0.0619978
GO:0016462	pyrophosphatase activity	molecular_function	7	LOC_Os05g36260	1	428	4	26868	0.0622159
GO:0008843	endochitinase activity	molecular_function	8	LOC_Os10g39680	1	428	4	26868	0.0622159
GO:0010112	regulation of systemic acquired resistance	biological_process	8	LOC_Os01g09800	1	428	4	26868	0.0622159
GO:0061062	regulation of nematode larval development	biological_process	8	LOC_Os03g47140	1	428	4	26868	0.0622159
GO:0045339	farnesyl diphosphate catabolic process	biological_process	9	LOC_Os04g01810	1	428	4	26868	0.0622159
GO:0005971	ribonucleoside-diphosphate reductase complex	cellular_component	7	LOC_Os06g14620	1	428	4	26868	0.0622159
GO:0019166	trans-2-enoyl-CoA reductase (NADPH) activity	molecular_function	7	LOC_Os11g06590	1	428	4	26868	0.0622159
GO:2000038	regulation of stomatal complex development	biological_process	8	LOC_Os03g17700	1	428	4	26868	0.0622159
GO:0006040	amino sugar metabolic process	biological_process	6	LOC_Os10g39680	1	428	4	26868	0.0622159
GO:0052659	inositol-1,3,4,5-tetrakisphosphate 5-phosphatase activity	molecular_function	10	LOC_Os01g08780	1	428	4	26868	0.0622159
GO:1901601	strigolactone biosynthetic process	biological_process	11	LOC_Os03g10620	1	428	4	26868	0.0622159
GO:0004861	cyclin-dependent protein serine/threonine kinase inhibitor activity	molecular_function	8	LOC_Os03g01740	1	428	4	26868	0.0622159
GO:0009930	longitudinal side of cell surface	cellular_component	4	LOC_Os10g35460	1	428	4	26868	0.0622159
GO:0071732	cellular response to nitric oxide	biological_process	8	LOC_Os12g26290	1	428	4	26868	0.0622159
GO:0044283	small molecule biosynthetic process	biological_process	5	LOC_Os01g53720	1	428	4	26868	0.0622159
GO:0070734	histone H3-K27 methylation	biological_process	13	LOC_Os02g03030	1	428	4	26868	0.0622159
GO:0006275	regulation of DNA replication	biological_process	9	LOC_Os02g03030	1	428	4	26868	0.0622159
GO:0016231	beta-N-acetylglucosaminidase activity	molecular_function	9	LOC_Os10g39680	1	428	4	26868	0.0622159
GO:0032957	inositol trisphosphate metabolic process	biological_process	8	LOC_Os01g08780	1	428	4	26868	0.0622159
GO:0052658	inositol-1,4,5-trisphosphate 5-phosphatase activity	molecular_function	10	LOC_Os01g08780	1	428	4	26868	0.0622159
GO:0035252	UDP-xylosyltransferase activity	molecular_function	7	LOC_Os03g19310	1	428	4	26868	0.0622159
GO:0010450	inflorescence meristem growth	biological_process	5	LOC_Os04g45330	1	428	4	26868	0.0622159
GO:0045333	cellular respiration	biological_process	7	LOC_Os04g51150	1	428	4	26868	0.0622159
GO:0009263	deoxyribonucleotide biosynthetic process	biological_process	10	LOC_Os06g14620	1	428	4	26868	0.0622159
GO:0009955	adaxial/abaxial pattern specification	biological_process	6	LOC_Os03g52320	1	428	4	26868	0.0622159
GO:0004748	ribonucleoside-diphosphate reductase activity, thioredoxin disulfide as acceptor	molecular_function	8	LOC_Os06g14620	1	428	4	26868	0.0622159
GO:0034605	cellular response to heat	biological_process	6	LOC_Os05g27730;LOC_Os01g61080	2	428	26	26868	0.064008
GO:0010154	fruit development	biological_process	6	LOC_Os09g23220;LOC_Os04g45330	2	428	26	26868	0.064008
GO:0015706	nitrate transport	biological_process	9	LOC_Os05g35650;LOC_Os08g05910	2	428	26	26868	0.064008
GO:0010334	sesquiterpene synthase activity	molecular_function	8	LOC_Os04g01810;LOC_Os04g27670	2	428	26	26868	0.064008
GO:0010224	response to UV-B	biological_process	8	LOC_Os05g35290;LOC_Os04g43800;LOC_Os03g17700	3	428	59	26868	0.0678978
GO:0009555	pollen development	biological_process	6	LOC_Os04g37430;LOC_Os07g04040;LOC_Os04g43800;LOC_Os03g17700;LOC_Os05g35290	5	428	140	26868	0.0737085
GO:0016491	oxidoreductase activity	molecular_function	4	LOC_Os04g30420;LOC_Os12g12560;LOC_Os07g04990;LOC_Os07g46852;LOC_Os04g53810;LOC_Os10g31780;LOC_Os12g12580;LOC_Os11g06590	8	428	275	26868	0.0744356
GO:0048281	inflorescence morphogenesis	biological_process	5	LOC_Os03g04070	1	428	5	26868	0.0771568
GO:0009052	pentose-phosphate shunt, non-oxidative branch	biological_process	6	LOC_Os04g24140	1	428	5	26868	0.0771568
GO:0033843	xyloglucan 6-xylosyltransferase activity	molecular_function	8	LOC_Os03g19310	1	428	5	26868	0.0771568
GO:0071705	nitrogen compound transport	biological_process	6	LOC_Os12g31860	1	428	5	26868	0.0771568
GO:0012511	monolayer-surrounded lipid storage body	cellular_component	7	LOC_Os12g26290	1	428	5	26868	0.0771568
GO:0006521	regulation of cellular amino acid metabolic process	biological_process	8	LOC_Os08g42080	1	428	5	26868	0.0771568
GO:0009113	purine nucleobase biosynthetic process	biological_process	10	LOC_Os05g35580	1	428	5	26868	0.0771568
GO:0004445	inositol-polyphosphate 5-phosphatase activity	molecular_function	10	LOC_Os01g08780	1	428	5	26868	0.0771568
GO:0034638	phosphatidylcholine catabolic process	biological_process	10	LOC_Os06g40170	1	428	5	26868	0.0771568
GO:0071323	cellular response to chitin	biological_process	8	LOC_Os02g45750	1	428	5	26868	0.0771568
GO:0015210	uracil transmembrane transporter activity	molecular_function	7	LOC_Os12g31860	1	428	5	26868	0.0771568
GO:0005247	voltage-gated chloride channel activity	molecular_function	9	LOC_Os12g25200	1	428	5	26868	0.0771568
GO:0010452	histone H3-K36 methylation	biological_process	13	LOC_Os07g02800	1	428	5	26868	0.0771568
GO:0006777	Mo-molybdopterin cofactor biosynthetic process	biological_process	8	LOC_Os02g35200	1	428	5	26868	0.0771568
GO:0010266	response to vitamin B1	biological_process	7	LOC_Os01g28500	1	428	5	26868	0.0771568
GO:0034484	raffinose catabolic process	biological_process	8	LOC_Os12g36870	1	428	5	26868	0.0771568
GO:0016762	xyloglucan:xyloglucosyl transferase activity	molecular_function	8	LOC_Os11g33270;LOC_Os09g23220	2	428	30	26868	0.0822269
GO:0008219	cell death	biological_process	4	LOC_Os01g09800;LOC_Os12g26290	2	428	31	26868	0.0870036
GO:0055114	oxidation-reduction process	biological_process	4	LOC_Os03g13210;LOC_Os05g37250;LOC_Os01g47760;LOC_Os08g43190;LOC_Os04g41960;LOC_Os07g04990;LOC_Os01g27230;LOC_Os11g06590;LOC_Os02g01510;LOC_Os04g15920;LOC_Os07g46852;LOC_Os04g51150;LOC_Os12g12560;LOC_Os12g12580;LOC_Os06g11210;LOC_Os04g30420;LOC_Os04g53810;LOC_Os01g63930;LOC_Os03g44380	19	428	852	26868	0.0899056
GO:0004351	glutamate decarboxylase activity	molecular_function	7	LOC_Os03g13300	1	428	6	26868	0.0918601
GO:0016328	lateral plasma membrane	cellular_component	5	LOC_Os10g35460	1	428	6	26868	0.0918601
GO:0019752	carboxylic acid metabolic process	biological_process	7	LOC_Os02g01510	1	428	6	26868	0.0918601
GO:1902183	regulation of shoot apical meristem development	biological_process	7	LOC_Os04g45330	1	428	6	26868	0.0918601
GO:0000272	polysaccharide catabolic process	biological_process	7	LOC_Os03g22790	1	428	6	26868	0.0918601
GO:0052692	raffinose alpha-galactosidase activity	molecular_function	9	LOC_Os12g36870	1	428	6	26868	0.0918601
GO:0004792	thiosulfate sulfurtransferase activity	molecular_function	7	LOC_Os12g24020	1	428	6	26868	0.0918601
GO:0009001	serine O-acetyltransferase activity	molecular_function	9	LOC_Os01g52260	1	428	6	26868	0.0918601
GO:0090575	RNA polymerase II transcription factor complex	cellular_component	6	LOC_Os01g01870	1	428	6	26868	0.0918601
GO:0034707	chloride channel complex	cellular_component	7	LOC_Os12g25200	1	428	6	26868	0.0918601
GO:0009897	external side of plasma membrane	cellular_component	5	LOC_Os10g35460	1	428	6	26868	0.0918601
GO:0015292	uniporter activity	molecular_function	7	LOC_Os06g09260	1	428	6	26868	0.0918601
GO:0071446	cellular response to salicylic acid stimulus	biological_process	7	LOC_Os12g26290	1	428	6	26868	0.0918601
GO:0048531	beta-1,3-galactosyltransferase activity	molecular_function	8	LOC_Os09g27950	1	428	6	26868	0.0918601
GO:0016123	xanthophyll biosynthetic process	biological_process	12	LOC_Os03g03370	1	428	6	26868	0.0918601
GO:0006342	chromatin silencing	biological_process	5	LOC_Os01g31800;LOC_Os08g33100	2	428	32	26868	0.0918612
GO:0009969	xyloglucan biosynthetic process	biological_process	10	LOC_Os03g19310;LOC_Os02g25630	2	428	32	26868	0.0918612
GO:0015079	potassium ion transmembrane transporter activity	molecular_function	9	LOC_Os09g27580;LOC_Os04g32920	2	428	32	26868	0.0918612
GO:0006355	regulation of transcription, DNA-templated	biological_process	8	LOC_Os03g47140;LOC_Os10g41330;LOC_Os03g55590;LOC_Os12g03290;LOC_Os05g25770;LOC_Os04g52090;LOC_Os02g48320;LOC_Os06g11860;LOC_Os09g33550;LOC_Os11g29870;LOC_Os05g46020;LOC_Os03g04070;LOC_Os02g03030;LOC_Os05g27730;LOC_Os03g49170;LOC_Os11g13930;LOC_Os09g28200;LOC_Os02g40530;LOC_Os03g52320;LOC_Os05g03760;LOC_Os05g34160;LOC_Os01g60640;LOC_Os09g16510;LOC_Os04g43680;LOC_Os01g61080;LOC_Os04g21950;LOC_Os03g…	33	428	1627	26868	0.0925718
GO:0009617	response to bacterium	biological_process	7	LOC_Os03g17700;LOC_Os01g09800;LOC_Os03g23010	3	428	68	26868	0.0945217
GO:0051289	protein homotetramerization	biological_process	9	LOC_Os10g37340	1	428	7	26868	0.10633
GO:0019288	isopentenyl diphosphate biosynthetic process, methylerythritol 4-phosphate pathway	biological_process	10	LOC_Os07g09190	1	428	7	26868	0.10633
GO:0006536	glutamate metabolic process	biological_process	11	LOC_Os03g13300	1	428	7	26868	0.10633
GO:0016114	terpenoid biosynthetic process	biological_process	9	LOC_Os07g09190	1	428	7	26868	0.10633
GO:0009228	thiamine biosynthetic process	biological_process	8	LOC_Os07g09190	1	428	7	26868	0.10633
GO:0015078	proton transmembrane transporter activity	molecular_function	9	LOC_Os03g17070	1	428	7	26868	0.10633
GO:0006555	methionine metabolic process	biological_process	10	LOC_Os10g28350	1	428	7	26868	0.10633
GO:0006821	chloride transport	biological_process	9	LOC_Os12g25200	1	428	7	26868	0.10633
GO:0009682	induced systemic resistance	biological_process	9	LOC_Os01g09800	1	428	7	26868	0.10633
GO:0004575	sucrose alpha-glucosidase activity	molecular_function	8	LOC_Os01g22900	1	428	7	26868	0.10633
GO:0090353	polygalacturonase inhibitor activity	molecular_function	6	LOC_Os07g38130	1	428	7	26868	0.10633
GO:0030414	peptidase inhibitor activity	molecular_function	6	LOC_Os08g27720	1	428	7	26868	0.10633
GO:0016702	oxidoreductase activity, acting on single donors with incorporation of molecular oxygen, incorporation of two atoms of oxygen	molecular_function	6	LOC_Os12g26290	1	428	7	26868	0.10633
GO:0007568	aging	biological_process	4	LOC_Os03g18770;LOC_Os09g25760	2	428	35	26868	0.106882
GO:0009507	chloroplast	cellular_component	7	LOC_Os01g63310;LOC_Os03g58290;LOC_Os03g22790;LOC_Os03g58300;LOC_Os09g20390;LOC_Os11g44940;LOC_Os03g44380;LOC_Os01g54340;LOC_Os08g37840;LOC_Os05g35260;LOC_Os03g03370;LOC_Os08g42080;LOC_Os02g56970;LOC_Os04g30420;LOC_Os01g61920;LOC_Os03g17200;LOC_Os12g24020;LOC_Os05g31750;LOC_Os09g16510;LOC_Os05g51520;LOC_Os03g58580;LOC_Os01g64120;LOC_Os10g41550;LOC_Os01g70820;LOC_Os05g35580;LOC_Os02g51710;LOC_Os02g…	46	428	2398	26868	0.108054
GO:0016788	hydrolase activity, acting on ester bonds	molecular_function	5	LOC_Os02g57110;LOC_Os08g02094;LOC_Os06g50950;LOC_Os07g42250;LOC_Os01g11750	5	428	159	26868	0.111041
GO:0009816	defense response to bacterium, incompatible interaction	biological_process	7	LOC_Os09g16510;LOC_Os01g63690	2	428	37	26868	0.117233
GO:0042742	defense response to bacterium	biological_process	8	LOC_Os03g17070;LOC_Os08g27720;LOC_Os01g61080;LOC_Os05g25770;LOC_Os05g27730;LOC_Os12g26290	6	428	209	26868	0.118229
GO:0033729	anthocyanidin reductase activity	molecular_function	7	LOC_Os04g53810	1	428	8	26868	0.120569
GO:0006796	phosphate-containing compound metabolic process	biological_process	6	LOC_Os05g36260	1	428	8	26868	0.120569
GO:0045549	9-cis-epoxycarotenoid dioxygenase activity	molecular_function	8	LOC_Os03g44380	1	428	8	26868	0.120569
GO:1901959	positive regulation of cutin biosynthetic process	biological_process	9	LOC_Os12g03290	1	428	8	26868	0.120569
GO:0009964	negative regulation of flavonoid biosynthetic process	biological_process	8	LOC_Os04g53810	1	428	8	26868	0.120569
GO:0045723	positive regulation of fatty acid biosynthetic process	biological_process	9	LOC_Os12g03290	1	428	8	26868	0.120569
GO:0008361	regulation of cell size	biological_process	6	LOC_Os03g60080	1	428	8	26868	0.120569
GO:0090351	seedling development	biological_process	5	LOC_Os01g08780	1	428	8	26868	0.120569
GO:0070696	transmembrane receptor protein serine/threonine kinase binding	molecular_function	7	LOC_Os04g34140	1	428	8	26868	0.120569
GO:0009626	plant-type hypersensitive response	biological_process	6	LOC_Os12g26290;LOC_Os03g17700;LOC_Os01g09800;LOC_Os11g12320	4	428	119	26868	0.122608
GO:0004364	glutathione transferase activity	molecular_function	6	LOC_Os02g56970;LOC_Os05g34150;LOC_Os10g38780;LOC_Os01g27210;LOC_Os09g29200	5	428	165	26868	0.124422
GO:0009741	response to brassinosteroid	biological_process	6	LOC_Os02g52010;LOC_Os02g45710	2	428	39	26868	0.127824
GO:0009735	response to cytokinin	biological_process	6	LOC_Os03g17070;LOC_Os04g58710;LOC_Os04g15920;LOC_Os08g42080	4	428	121	26868	0.128105
GO:0020037	heme binding	molecular_function	6	LOC_Os01g63930;LOC_Os12g26290;LOC_Os05g37250;LOC_Os01g11230;LOC_Os03g13210	5	428	167	26868	0.129042
GO:0043621	protein self-association	molecular_function	5	LOC_Os02g48320;LOC_Os03g04110	2	428	40	26868	0.133201
GO:0047274	galactinol-sucrose galactosyltransferase activity	molecular_function	8	LOC_Os12g36870	1	428	9	26868	0.134583
GO:0010440	stomatal lineage progression	biological_process	5	LOC_Os09g29100	1	428	9	26868	0.134583
GO:0045165	cell fate commitment	biological_process	5	LOC_Os04g45330	1	428	9	26868	0.134583
GO:0070469	respirasome	cellular_component	4	LOC_Os04g51150	1	428	9	26868	0.134583
GO:0010158	abaxial cell fate specification	biological_process	6	LOC_Os04g45330	1	428	9	26868	0.134583
GO:0047461	(+)-delta-cadinene synthase activity	molecular_function	9	LOC_Os04g27340	1	428	9	26868	0.134583
GO:0004066	asparagine synthase (glutamine-hydrolyzing) activity	molecular_function	7	LOC_Os04g58280	1	428	9	26868	0.134583
GO:1901928	cadinene biosynthetic process	biological_process	11	LOC_Os04g27340	1	428	9	26868	0.134583
GO:0046855	inositol phosphate dephosphorylation	biological_process	9	LOC_Os01g08780	1	428	9	26868	0.134583
GO:0006529	asparagine biosynthetic process	biological_process	12	LOC_Os04g58280	1	428	9	26868	0.134583
GO:0009736	cytokinin-activated signaling pathway	biological_process	6	LOC_Os01g46870;LOC_Os06g11860	2	428	41	26868	0.138628
GO:0042546	cell wall biogenesis	biological_process	5	LOC_Os11g33270;LOC_Os09g23220	2	428	41	26868	0.138628
GO:0045595	regulation of cell differentiation	biological_process	6	LOC_Os06g11860	1	428	10	26868	0.148373
GO:0000381	regulation of alternative mRNA splicing, via spliceosome	biological_process	10	LOC_Os02g14780	1	428	10	26868	0.148373
GO:0008356	asymmetric cell division	biological_process	5	LOC_Os09g28200	1	428	10	26868	0.148373
GO:0004033	aldo-keto reductase (NADP) activity	molecular_function	7	LOC_Os07g04990	1	428	10	26868	0.148373
GO:0009625	response to insect	biological_process	7	LOC_Os01g09800	1	428	10	26868	0.148373
GO:0019139	cytokinin dehydrogenase activity	molecular_function	6	LOC_Os01g56810	1	428	10	26868	0.148373
GO:0009938	negative regulation of gibberellic acid mediated signaling pathway	biological_process	9	LOC_Os02g48320	1	428	10	26868	0.148373
GO:0042128	nitrate assimilation	biological_process	8	LOC_Os01g37590;LOC_Os08g05910	2	428	43	26868	0.149621
GO:0016132	brassinosteroid biosynthetic process	biological_process	9	LOC_Os08g36860;LOC_Os02g47470	2	428	44	26868	0.155181
GO:0034485	phosphatidylinositol-3,4,5-trisphosphate 5-phosphatase activity	molecular_function	10	LOC_Os01g08780	1	428	11	26868	0.161944
GO:0033617	mitochondrial respiratory chain complex IV assembly	biological_process	10	LOC_Os11g02080	1	428	11	26868	0.161944
GO:0009688	abscisic acid biosynthetic process	biological_process	11	LOC_Os03g44380	1	428	11	26868	0.161944
GO:0010214	seed coat development	biological_process	5	LOC_Os04g58710	1	428	11	26868	0.161944
GO:0016757	transferase activity, transferring glycosyl groups	molecular_function	5	LOC_Os10g40640;LOC_Os02g54820;LOC_Os03g19310;LOC_Os02g22160;LOC_Os12g36870;LOC_Os08g31980;LOC_Os08g34580;LOC_Os09g27950	8	428	333	26868	0.164217
GO:0048366	leaf development	biological_process	7	LOC_Os03g52320;LOC_Os03g47140;LOC_Os01g46870	3	428	88	26868	0.165524
GO:0009635	response to herbicide	biological_process	5	LOC_Os08g05910	1	428	12	26868	0.1753
GO:0071456	cellular response to hypoxia	biological_process	6	LOC_Os09g29710	1	428	12	26868	0.1753
GO:0022900	electron transport chain	biological_process	6	LOC_Os01g64120	1	428	12	26868	0.1753
GO:0016165	linoleate 13S-lipoxygenase activity	molecular_function	7	LOC_Os04g37430	1	428	12	26868	0.1753
GO:0048825	cotyledon development	biological_process	6	LOC_Os01g46870	1	428	12	26868	0.1753
GO:0050829	defense response to Gram-negative bacterium	biological_process	9	LOC_Os09g25760	1	428	12	26868	0.1753
GO:0006189	'de novo' IMP biosynthetic process	biological_process	13	LOC_Os05g35580	1	428	12	26868	0.1753
GO:0016798	hydrolase activity, acting on glycosyl bonds	molecular_function	5	LOC_Os09g23220;LOC_Os11g33270	2	428	48	26868	0.177787
GO:0016042	lipid catabolic process	biological_process	6	LOC_Os01g11750;LOC_Os02g43700;LOC_Os02g57110;LOC_Os08g02094;LOC_Os06g50950	5	428	187	26868	0.179213
GO:0009933	meristem structural organization	biological_process	5	LOC_Os04g45330	1	428	13	26868	0.188443
GO:0009116	nucleoside metabolic process	biological_process	8	LOC_Os05g35580	1	428	13	26868	0.188443
GO:0004124	cysteine synthase activity	molecular_function	6	LOC_Os06g36880	1	428	13	26868	0.188443
GO:0016208	AMP binding	molecular_function	5	LOC_Os04g58710	1	428	13	26868	0.188443
GO:0009864	induced systemic resistance, jasmonic acid mediated signaling pathway	biological_process	6	LOC_Os05g25770	1	428	13	26868	0.188443
GO:0010268	brassinosteroid homeostasis	biological_process	8	LOC_Os02g47470;LOC_Os08g36860	2	428	50	26868	0.189273
GO:0007049	cell cycle	biological_process	4	LOC_Os08g03620;LOC_Os09g29100;LOC_Os03g41100	3	428	95	26868	0.193283
GO:0006857	oligopeptide transport	biological_process	9	LOC_Os01g37590;LOC_Os05g35650;LOC_Os08g05910	3	428	95	26868	0.193283
GO:0046982	protein heterodimerization activity	molecular_function	6	LOC_Os01g61920;LOC_Os11g05730;LOC_Os06g06480	3	428	95	26868	0.193283
GO:0009845	seed germination	biological_process	4	LOC_Os03g06360;LOC_Os01g08780	2	428	51	26868	0.195053
GO:0005987	sucrose catabolic process	biological_process	9	LOC_Os01g22900	1	428	14	26868	0.201377
GO:0006949	syncytium formation	biological_process	4	LOC_Os03g21820	1	428	14	26868	0.201377
GO:0000038	very long-chain fatty acid metabolic process	biological_process	10	LOC_Os09g34930	1	428	14	26868	0.201377
GO:0047714	galactolipase activity	molecular_function	7	LOC_Os02g43700	1	428	14	26868	0.201377
GO:0040007	growth	biological_process	3	LOC_Os04g37430	1	428	14	26868	0.201377
GO:0046685	response to arsenic-containing substance	biological_process	5	LOC_Os10g31780	1	428	14	26868	0.201377
GO:0010215	cellulose microfibril organization	biological_process	7	LOC_Os10g35460	1	428	14	26868	0.201377
GO:0010093	specification of floral organ identity	biological_process	5	LOC_Os04g45330	1	428	14	26868	0.201377
GO:0019825	oxygen binding	molecular_function	5	LOC_Os05g37250;LOC_Os01g63930	2	428	53	26868	0.206677
GO:0005618	cell wall	cellular_component	5	LOC_Os09g23220;LOC_Os08g09010;LOC_Os03g21820;LOC_Os05g35580;LOC_Os09g39760;LOC_Os04g03810;LOC_Os11g33270;LOC_Os07g38130;LOC_Os08g37840;LOC_Os10g33140;LOC_Os10g26940;LOC_Os01g28500;LOC_Os02g52010	13	428	632	26868	0.211147
GO:0031225	anchored component of membrane	cellular_component	5	LOC_Os10g05660;LOC_Os10g35460;LOC_Os05g07060	3	428	100	26868	0.213769
GO:0006790	sulfur compound metabolic process	biological_process	5	LOC_Os02g35200	1	428	15	26868	0.214106
GO:0009269	response to desiccation	biological_process	6	LOC_Os05g50710	1	428	15	26868	0.214106
GO:0045330	aspartyl esterase activity	molecular_function	6	LOC_Os09g39760	1	428	15	26868	0.214106
GO:0004707	MAP kinase activity	molecular_function	9	LOC_Os03g17700	1	428	15	26868	0.214106
GO:0004427	inorganic diphosphatase activity	molecular_function	8	LOC_Os05g36260	1	428	15	26868	0.214106
GO:0050662	coenzyme binding	molecular_function	5	LOC_Os04g53810;LOC_Os06g44170	2	428	56	26868	0.224241
GO:2000031	regulation of salicylic acid mediated signaling pathway	biological_process	8	LOC_Os01g09800	1	428	16	26868	0.226632
GO:0016301	kinase activity	molecular_function	6	LOC_Os04g45730;LOC_Os01g66760;LOC_Os02g10920;LOC_Os10g33040;LOC_Os07g04040;LOC_Os12g02200;LOC_Os11g02240;LOC_Os06g17490;LOC_Os02g45750;LOC_Os02g48210;LOC_Os05g44770;LOC_Os06g04920;LOC_Os01g53920;LOC_Os06g50100;LOC_Os08g24310;LOC_Os03g17700	16	428	815	26868	0.230633
GO:0051536	iron-sulfur cluster binding	molecular_function	5	LOC_Os05g35580	1	428	17	26868	0.238959
GO:0010187	negative regulation of seed germination	biological_process	10	LOC_Os12g03290	1	428	17	26868	0.238959
GO:0006813	potassium ion transport	biological_process	9	LOC_Os04g32920	1	428	17	26868	0.238959
GO:0010494	cytoplasmic stress granule	cellular_component	8	LOC_Os05g45020	1	428	17	26868	0.238959
GO:2000024	regulation of leaf development	biological_process	8	LOC_Os04g45330	1	428	17	26868	0.238959
GO:0008308	voltage-gated anion channel activity	molecular_function	10	LOC_Os05g13320	1	428	17	26868	0.238959
GO:0045338	farnesyl diphosphate metabolic process	biological_process	8	LOC_Os04g27670	1	428	17	26868	0.238959
GO:0042538	hyperosmotic salinity response	biological_process	7	LOC_Os06g50950;LOC_Os03g44380	2	428	59	26868	0.241911
GO:0046872	metal ion binding	molecular_function	6	LOC_Os05g03760;LOC_Os11g15570;LOC_Os08g38220;LOC_Os03g10950;LOC_Os05g35580;LOC_Os04g37430;LOC_Os03g49170;LOC_Os11g13930;LOC_Os03g13210;LOC_Os01g64120;LOC_Os01g69270;LOC_Os04g45330;LOC_Os05g45020;LOC_Os04g51150;LOC_Os03g44380;LOC_Os10g40640;LOC_Os12g26290;LOC_Os07g09190	18	428	943	26868	0.248557
GO:0098542	defense response to other organism	biological_process	6	LOC_Os03g63310	1	428	18	26868	0.251089
GO:0010030	positive regulation of seed germination	biological_process	10	LOC_Os04g58710	1	428	18	26868	0.251089
GO:0007275	multicellular organism development	biological_process	4	LOC_Os12g03290;LOC_Os03g04070;LOC_Os02g47470;LOC_Os01g60020;LOC_Os03g60080;LOC_Os08g36860	6	428	267	26868	0.253964
GO:0006633	fatty acid biosynthetic process	biological_process	10	LOC_Os11g06590;LOC_Os09g34930;LOC_Os02g11070	3	428	110	26868	0.255951
GO:0010223	secondary shoot formation	biological_process	6	LOC_Os03g10620	1	428	19	26868	0.263027
GO:0042273	ribosomal large subunit biogenesis	biological_process	6	LOC_Os01g04730	1	428	19	26868	0.263027
GO:1900056	negative regulation of leaf senescence	biological_process	10	LOC_Os05g25770	1	428	19	26868	0.263027
GO:0015986	ATP synthesis coupled proton transport	biological_process	13	LOC_Os03g17070	1	428	19	26868	0.263027
GO:0009863	salicylic acid mediated signaling pathway	biological_process	5	LOC_Os01g47760	1	428	19	26868	0.263027
GO:0006357	regulation of transcription by RNA polymerase II	biological_process	9	LOC_Os03g06850;LOC_Os01g01870;LOC_Os09g33882	3	428	112	26868	0.264531
GO:0006749	glutathione metabolic process	biological_process	8	LOC_Os10g38780;LOC_Os01g27210;LOC_Os09g29200;LOC_Os05g34150	4	428	166	26868	0.272788
GO:0016709	oxidoreductase activity, acting on paired donors, with incorporation or reduction of molecular oxygen, NAD(P)H as one donor, and incorporation of one atom of oxygen	molecular_function	6	LOC_Os10g36960;LOC_Os02g47470;LOC_Os10g36980;LOC_Os02g30780;LOC_Os03g63310	5	428	220	26868	0.274252
GO:0001055	RNA polymerase II activity	molecular_function	10	LOC_Os12g07980	1	428	20	26868	0.274775
GO:0048579	negative regulation of long-day photoperiodism, flowering	biological_process	9	LOC_Os07g02800	1	428	20	26868	0.274775
GO:0009654	photosystem II oxygen evolving complex	cellular_component	6	LOC_Os01g70820	1	428	20	26868	0.274775
GO:0030599	pectinesterase activity	molecular_function	7	LOC_Os01g57854;LOC_Os09g39760	2	428	66	26868	0.283289
GO:0006855	drug transmembrane transport	biological_process	7	LOC_Os03g08900;LOC_Os04g30490	2	428	66	26868	0.283289
GO:0046856	phosphatidylinositol dephosphorylation	biological_process	10	LOC_Os01g08780	1	428	21	26868	0.286337
GO:0009887	animal organ morphogenesis	biological_process	5	LOC_Os12g03290	1	428	21	26868	0.286337
GO:0048527	lateral root development	biological_process	8	LOC_Os11g29870	1	428	22	26868	0.297714
GO:0031305	integral component of mitochondrial inner membrane	cellular_component	8	LOC_Os11g02080	1	428	22	26868	0.297714
GO:0010167	response to nitrate	biological_process	6	LOC_Os08g05910	1	428	22	26868	0.297714
GO:0032502	developmental process	biological_process	3	LOC_Os03g17200	1	428	22	26868	0.297714
GO:0051017	actin filament bundle assembly	biological_process	6	LOC_Os06g13030	1	428	22	26868	0.297714
GO:0044550	secondary metabolite biosynthetic process	biological_process	5	LOC_Os03g05900;LOC_Os02g30780;LOC_Os10g36960;LOC_Os10g36980;LOC_Os03g63310	5	428	229	26868	0.301889
GO:0000209	protein polyubiquitination	biological_process	12	LOC_Os02g45780;LOC_Os01g74040;LOC_Os01g16950	3	428	121	26868	0.303489
GO:0051301	cell division	biological_process	4	LOC_Os03g41100;LOC_Os09g29100;LOC_Os02g45780;LOC_Os08g03620	4	428	175	26868	0.304774
GO:0044212	transcription regulatory region DNA binding	molecular_function	7	LOC_Os04g52090;LOC_Os08g38220;LOC_Os01g14440;LOC_Os03g55540	4	428	176	26868	0.308356
GO:0043424	protein histidine kinase binding	molecular_function	8	LOC_Os03g60080	1	428	23	26868	0.30891
GO:0010193	response to ozone	biological_process	7	LOC_Os09g16510	1	428	23	26868	0.30891
GO:0030014	CCR4-NOT complex	cellular_component	4	LOC_Os04g58810	1	428	23	26868	0.30891
GO:0008417	fucosyltransferase activity	molecular_function	7	LOC_Os02g25630	1	428	23	26868	0.30891
GO:0009738	abscisic acid-activated signaling pathway	biological_process	6	LOC_Os12g36830;LOC_Os03g17700;LOC_Os01g08780;LOC_Os12g36880	4	428	178	26868	0.315532
GO:0010150	leaf senescence	biological_process	6	LOC_Os07g17330;LOC_Os09g16510	2	428	72	26868	0.318606
GO:0005983	starch catabolic process	biological_process	10	LOC_Os10g41550	1	428	24	26868	0.319929
GO:0031348	negative regulation of defense response	biological_process	8	LOC_Os01g09800	1	428	24	26868	0.319929
GO:0009532	plastid stroma	cellular_component	7	LOC_Os05g35580	1	428	25	26868	0.330772
GO:0009266	response to temperature stimulus	biological_process	5	LOC_Os07g02800	1	428	25	26868	0.330772
GO:0008970	phospholipase A1 activity	molecular_function	8	LOC_Os02g43700	1	428	25	26868	0.330772
GO:0015995	chlorophyll biosynthetic process	biological_process	9	LOC_Os07g09190	1	428	25	26868	0.330772
GO:0010017	red or far-red light signaling pathway	biological_process	5	LOC_Os06g11860	1	428	25	26868	0.330772
GO:0009451	RNA modification	biological_process	9	LOC_Os07g14150	1	428	25	26868	0.330772
GO:0016874	ligase activity	molecular_function	4	LOC_Os03g03790;LOC_Os04g34140;LOC_Os06g06490	3	428	129	26868	0.338328
GO:0008270	zinc ion binding	molecular_function	8	LOC_Os12g12560;LOC_Os02g45710;LOC_Os04g41960;LOC_Os12g12580;LOC_Os02g03030;LOC_Os09g31200;LOC_Os09g33550;LOC_Os01g60640;LOC_Os12g07980;LOC_Os07g46852;LOC_Os06g13030;LOC_Os04g15920;LOC_Os04g30420;LOC_Os02g10920;LOC_Os08g43190;LOC_Os06g04920;LOC_Os11g06590	17	428	945	26868	0.338598
GO:0004439	phosphatidylinositol-4,5-bisphosphate 5-phosphatase activity	molecular_function	10	LOC_Os01g08780	1	428	26	26868	0.341442
GO:0009825	multidimensional cell growth	biological_process	5	LOC_Os10g35460	1	428	26	26868	0.341442
GO:0042626	ATPase-coupled transmembrane transporter activity	molecular_function	8	LOC_Os01g50100;LOC_Os01g42380;LOC_Os08g29570	3	428	130	26868	0.342681
GO:0071004	U2-type prespliceosome	cellular_component	8	LOC_Os02g14780	1	428	27	26868	0.351943
GO:0051865	protein autoubiquitination	biological_process	12	LOC_Os09g31200	1	428	27	26868	0.351943
GO:0000122	negative regulation of transcription by RNA polymerase II	biological_process	10	LOC_Os11g29870	1	428	27	26868	0.351943
GO:0031463	Cul3-RING ubiquitin ligase complex	cellular_component	7	LOC_Os11g14140	1	428	27	26868	0.351943
GO:0009944	polarity specification of adaxial/abaxial axis	biological_process	6	LOC_Os04g45330	1	428	27	26868	0.351943
GO:0001085	RNA polymerase II transcription factor binding	molecular_function	6	LOC_Os01g54210	1	428	27	26868	0.351943
GO:0042349	guiding stereospecific synthesis activity	molecular_function	5	LOC_Os10g14011;LOC_Os07g42520	2	428	79	26868	0.359255
GO:0042335	cuticle development	biological_process	5	LOC_Os09g34930	1	428	28	26868	0.362277
GO:0005665	RNA polymerase II, core complex	cellular_component	7	LOC_Os12g07980	1	428	28	26868	0.362277
GO:0005736	RNA polymerase I complex	cellular_component	7	LOC_Os12g07980	1	428	29	26868	0.372446
GO:0001054	RNA polymerase I activity	molecular_function	10	LOC_Os12g07980	1	428	29	26868	0.372446
GO:0006520	cellular amino acid metabolic process	biological_process	8	LOC_Os10g37340	1	428	29	26868	0.372446
GO:0048481	plant ovule development	biological_process	5	LOC_Os03g17700	1	428	29	26868	0.372446
GO:0015112	nitrate transmembrane transporter activity	molecular_function	8	LOC_Os08g05910	1	428	29	26868	0.372446
GO:0022857	transmembrane transporter activity	molecular_function	4	LOC_Os02g47500;LOC_Os07g34070	2	428	83	26868	0.382088
GO:0010229	inflorescence development	biological_process	6	LOC_Os03g17700	1	428	30	26868	0.382454
GO:0005615	extracellular space	cellular_component	4	LOC_Os02g52010;LOC_Os08g37840;LOC_Os11g13540	3	428	140	26868	0.386004
GO:0007165	signal transduction	biological_process	4	LOC_Os03g17700;LOC_Os12g02200;LOC_Os03g11550;LOC_Os11g02240;LOC_Os01g53920;LOC_Os07g38130;LOC_Os07g41160	7	428	376	26868	0.391974
GO:0006468	protein phosphorylation	biological_process	9	LOC_Os12g02200;LOC_Os02g48210;LOC_Os05g44770;LOC_Os06g50100;LOC_Os07g04040;LOC_Os03g16950;LOC_Os08g24310;LOC_Os07g29330;LOC_Os03g03510;LOC_Os11g02240;LOC_Os12g43440;LOC_Os06g17490;LOC_Os01g03690;LOC_Os07g35370;LOC_Os09g24330;LOC_Os10g33040;LOC_Os04g34270;LOC_Os02g45750;LOC_Os07g39520;LOC_Os07g35390;LOC_Os01g66760	21	428	1222	26868	0.392047
GO:0000175	3'-5'-exoribonuclease activity	molecular_function	9	LOC_Os04g58810	1	428	31	26868	0.392302
GO:0000288	nuclear-transcribed mRNA catabolic process, deadenylation-dependent decay	biological_process	12	LOC_Os04g58810	1	428	31	26868	0.392302
GO:0006811	ion transport	biological_process	6	LOC_Os05g13320	1	428	31	26868	0.392302
GO:0042803	protein homodimerization activity	molecular_function	6	LOC_Os11g13930;LOC_Os02g45750;LOC_Os04g58280	3	428	143	26868	0.398884
GO:0009723	response to ethylene	biological_process	6	LOC_Os10g41200;LOC_Os11g45740;LOC_Os04g43680	3	428	143	26868	0.398884
GO:0005886	plasma membrane	cellular_component	4	LOC_Os07g04040;LOC_Os04g30420;LOC_Os01g37590;LOC_Os01g62430;LOC_Os05g13320;LOC_Os02g45750;LOC_Os05g50710;LOC_Os03g16950;LOC_Os01g47730;LOC_Os08g13570;LOC_Os05g07060;LOC_Os09g25760;LOC_Os08g05910;LOC_Os12g31860;LOC_Os11g02240;LOC_Os02g47500;LOC_Os01g61920;LOC_Os08g24310;LOC_Os02g45780;LOC_Os05g35650;LOC_Os08g43190;LOC_Os07g35390;LOC_Os01g66760;LOC_Os06g13030;LOC_Os12g08130;LOC_Os10g33040;LOC_Os09g…	59	428	3569	26868	0.400357
GO:0005686	U2 snRNP	cellular_component	8	LOC_Os02g14780	1	428	32	26868	0.401994
GO:0048767	root hair elongation	biological_process	6	LOC_Os03g19310	1	428	32	26868	0.401994
GO:0005667	transcription factor complex	cellular_component	4	LOC_Os01g54210	1	428	33	26868	0.411531
GO:0000271	polysaccharide biosynthetic process	biological_process	7	LOC_Os03g19310	1	428	33	26868	0.411531
GO:0016036	cellular response to phosphate starvation	biological_process	9	LOC_Os01g14440	1	428	33	26868	0.411531
GO:0004693	cyclin-dependent protein serine/threonine kinase activity	molecular_function	9	LOC_Os09g29100	1	428	34	26868	0.420917
GO:0016538	cyclin-dependent protein serine/threonine kinase regulator activity	molecular_function	7	LOC_Os03g41100	1	428	34	26868	0.420917
GO:0008283	cell population proliferation	biological_process	3	LOC_Os03g52320	1	428	35	26868	0.430153
GO:0005829	cytosol	cellular_component	6	LOC_Os03g13300;LOC_Os08g42080;LOC_Os05g42230;LOC_Os04g24140;LOC_Os08g43190;LOC_Os01g52260;LOC_Os02g54820;LOC_Os07g29330;LOC_Os01g47730;LOC_Os02g52010;LOC_Os10g37340;LOC_Os02g01510;LOC_Os11g15570;LOC_Os05g35260;LOC_Os07g38130;LOC_Os02g35200;LOC_Os08g13570;LOC_Os07g14150;LOC_Os02g08270;LOC_Os05g35580;LOC_Os07g39520;LOC_Os01g61920;LOC_Os05g50710;LOC_Os04g58710;LOC_Os02g51710;LOC_Os04g41960;LOC_Os04g…	30	428	1807	26868	0.434186
GO:0048653	anther development	biological_process	5	LOC_Os04g37430	1	428	36	26868	0.439243
GO:0008375	acetylglucosaminyltransferase activity	molecular_function	7	LOC_Os02g22160	1	428	36	26868	0.439243
GO:0009624	response to nematode	biological_process	7	LOC_Os03g47140	1	428	36	26868	0.439243
GO:0005774	vacuolar membrane	cellular_component	7	LOC_Os01g61920;LOC_Os01g07370;LOC_Os01g51870;LOC_Os01g40070;LOC_Os01g11230;LOC_Os02g51710;LOC_Os05g51520	7	428	395	26868	0.44123
GO:0016758	transferase activity, transferring hexosyl groups	molecular_function	6	LOC_Os10g40640	1	428	37	26868	0.448187
GO:0005506	iron ion binding	molecular_function	8	LOC_Os01g63930;LOC_Os05g37250	2	428	96	26868	0.453632
GO:0042938	dipeptide transport	biological_process	10	LOC_Os05g35650	1	428	38	26868	0.45699
GO:0051537	2 iron, 2 sulfur cluster binding	molecular_function	6	LOC_Os01g64120	1	428	39	26868	0.465652
GO:0009788	negative regulation of abscisic acid-activated signaling pathway	biological_process	9	LOC_Os01g60020	1	428	39	26868	0.465652
GO:0016051	carbohydrate biosynthetic process	biological_process	6	LOC_Os10g40640	1	428	39	26868	0.465652
GO:0009744	response to sucrose	biological_process	8	LOC_Os03g60080	1	428	40	26868	0.474176
GO:0005666	RNA polymerase III complex	cellular_component	8	LOC_Os12g07980	1	428	40	26868	0.474176
GO:0004867	serine-type endopeptidase inhibitor activity	molecular_function	8	LOC_Os11g13540	1	428	40	26868	0.474176
GO:0001056	RNA polymerase III activity	molecular_function	10	LOC_Os12g07980	1	428	40	26868	0.474176
GO:0022625	cytosolic large ribosomal subunit	cellular_component	8	LOC_Os01g04730;LOC_Os07g42170;LOC_Os02g07890	3	428	162	26868	0.478303
GO:0040008	regulation of growth	biological_process	5	LOC_Os12g03290	1	428	41	26868	0.482565
GO:1901657	glycosyl compound metabolic process	biological_process	6	LOC_Os11g45710	1	428	41	26868	0.482565
GO:0045490	pectin catabolic process	biological_process	8	LOC_Os09g39760	1	428	41	26868	0.482565
GO:0030244	cellulose biosynthetic process	biological_process	11	LOC_Os04g24140	1	428	41	26868	0.482565
GO:0031966	mitochondrial membrane	cellular_component	5	LOC_Os08g43190	1	428	41	26868	0.482565
GO:0055085	transmembrane transport	biological_process	6	LOC_Os05g13320;LOC_Os03g58580;LOC_Os01g50100	3	428	164	26868	0.48639
GO:0003824	catalytic activity	molecular_function	3	LOC_Os08g43180;LOC_Os02g35200;LOC_Os06g44170;LOC_Os10g37340	4	428	227	26868	0.489781
GO:0090406	pollen tube	cellular_component	6	LOC_Os10g33040	1	428	42	26868	0.49082
GO:0001046	core promoter sequence-specific DNA binding	molecular_function	9	LOC_Os11g29870	1	428	42	26868	0.49082
GO:0019843	rRNA binding	molecular_function	7	LOC_Os11g34940	1	428	42	26868	0.49082
GO:0045893	positive regulation of transcription, DNA-templated	biological_process	9	LOC_Os09g16510;LOC_Os01g09800;LOC_Os08g38220	3	428	166	26868	0.494416
GO:0009535	chloroplast thylakoid membrane	cellular_component	8	LOC_Os04g30420;LOC_Os03g17070;LOC_Os03g44380;LOC_Os07g04990;LOC_Os02g51710	5	428	291	26868	0.495004
GO:0033609	oxalate metabolic process	biological_process	9	LOC_Os08g09010	1	428	43	26868	0.498944
GO:0046564	oxalate decarboxylase activity	molecular_function	7	LOC_Os08g09010	1	428	43	26868	0.498944
GO:0004650	polygalacturonase activity	molecular_function	7	LOC_Os10g26940	1	428	44	26868	0.506938
GO:0009055	electron transfer activity	molecular_function	5	LOC_Os01g47760;LOC_Os01g64120	2	428	107	26868	0.510328
GO:0000287	magnesium ion binding	molecular_function	7	LOC_Os05g36260;LOC_Os03g46640	2	428	107	26868	0.510328
GO:0006913	nucleocytoplasmic transport	biological_process	8	LOC_Os01g47730	1	428	45	26868	0.514806
GO:0005215	transporter activity	molecular_function	3	LOC_Os05g13320;LOC_Os01g37590;LOC_Os05g35650;LOC_Os08g05910	4	428	236	26868	0.520118
GO:0003713	transcription coactivator activity	molecular_function	5	LOC_Os03g52320	1	428	46	26868	0.522548
GO:0009809	lignin biosynthetic process	biological_process	8	LOC_Os07g41060;LOC_Os04g15920	2	428	111	26868	0.52997
GO:0002181	cytoplasmic translation	biological_process	9	LOC_Os01g04730	1	428	47	26868	0.530166
GO:0000145	exocyst	cellular_component	7	LOC_Os08g13570	1	428	47	26868	0.530166
GO:0001666	response to hypoxia	biological_process	5	LOC_Os01g09800	1	428	47	26868	0.530166
GO:0006631	fatty acid metabolic process	biological_process	9	LOC_Os03g03790	1	428	47	26868	0.530166
GO:0043531	ADP binding	molecular_function	9	LOC_Os11g11960;LOC_Os11g12320;LOC_Os04g43440;LOC_Os02g18070;LOC_Os12g17430	5	428	303	26868	0.530636
GO:0019898	extrinsic component of membrane	cellular_component	4	LOC_Os01g70820	1	428	48	26868	0.537664
GO:0009831	plant-type cell wall modification involved in multidimensional cell growth	biological_process	9	LOC_Os03g21820	1	428	48	26868	0.537664
GO:0009734	auxin-activated signaling pathway	biological_process	6	LOC_Os02g35200;LOC_Os08g05910	2	428	113	26868	0.539588
GO:0004674	protein serine/threonine kinase activity	molecular_function	8	LOC_Os05g44770;LOC_Os10g33040;LOC_Os03g03510;LOC_Os11g44560;LOC_Os04g34270;LOC_Os02g48210;LOC_Os07g04040;LOC_Os01g66760;LOC_Os06g17490;LOC_Os09g24330;LOC_Os04g58890;LOC_Os07g29330;LOC_Os11g02240;LOC_Os12g43440;LOC_Os01g03690;LOC_Os07g39520;LOC_Os06g50100;LOC_Os07g35370;LOC_Os08g24310;LOC_Os12g02200;LOC_Os07g35390;LOC_Os03g16950;LOC_Os02g06930	23	428	1453	26868	0.543166
GO:0004712	protein serine/threonine/tyrosine kinase activity	molecular_function	8	LOC_Os07g29330	1	428	49	26868	0.545042
GO:0006904	vesicle docking involved in exocytosis	biological_process	7	LOC_Os08g13570	1	428	50	26868	0.552303
GO:0009058	biosynthetic process	biological_process	4	LOC_Os10g40640	1	428	50	26868	0.552303
GO:0051213	dioxygenase activity	molecular_function	5	LOC_Os08g37456;LOC_Os03g03034	2	428	116	26868	0.553759
GO:0030246	carbohydrate binding	molecular_function	4	LOC_Os07g04040;LOC_Os02g48210;LOC_Os06g17490	3	428	182	26868	0.556226
GO:0008422	beta-glucosidase activity	molecular_function	8	LOC_Os11g45710	1	428	51	26868	0.559448
GO:0046910	pectinesterase inhibitor activity	molecular_function	6	LOC_Os01g57854	1	428	51	26868	0.559448
GO:0048364	root development	biological_process	6	LOC_Os03g47140;LOC_Os02g45780	2	428	118	26868	0.563034
GO:0004806	triglyceride lipase activity	molecular_function	7	LOC_Os02g43700	1	428	52	26868	0.566479
GO:0005743	mitochondrial inner membrane	cellular_component	6	LOC_Os04g51150	1	428	52	26868	0.566479
GO:0009828	plant-type cell wall loosening	biological_process	9	LOC_Os03g21820	1	428	52	26868	0.566479
GO:0032259	methylation	biological_process	4	LOC_Os02g48770;LOC_Os01g51870;LOC_Os06g20960	3	428	185	26868	0.567305
GO:0045087	innate immune response	biological_process	5	LOC_Os02g45750	1	428	53	26868	0.573398
GO:0004497	monooxygenase activity	molecular_function	5	LOC_Os03g12500;LOC_Os03g55800;LOC_Os03g05900	3	428	188	26868	0.578213
GO:0009965	leaf morphogenesis	biological_process	6	LOC_Os03g04070	1	428	54	26868	0.580207
GO:0003735	structural constituent of ribosome	molecular_function	4	LOC_Os11g34940;LOC_Os07g42170;LOC_Os01g04730;LOC_Os02g07890;LOC_Os07g43310;LOC_Os07g10660	6	428	386	26868	0.580665
GO:0009570	chloroplast stroma	cellular_component	8	LOC_Os03g44380;LOC_Os04g58710;LOC_Os05g35580;LOC_Os07g09190;LOC_Os06g07860;LOC_Os10g41550;LOC_Os01g48500	7	428	453	26868	0.584869
GO:0004721	phosphoprotein phosphatase activity	molecular_function	8	LOC_Os11g15570	1	428	55	26868	0.586908
GO:0016791	phosphatase activity	molecular_function	7	LOC_Os01g53720	1	428	55	26868	0.586908
GO:0009740	gibberellic acid mediated signaling pathway	biological_process	7	LOC_Os07g02800	1	428	56	26868	0.593502
GO:0016722	oxidoreductase activity, oxidizing metal ions	molecular_function	5	LOC_Os01g63190	1	428	56	26868	0.593502
GO:0005856	cytoskeleton	cellular_component	6	LOC_Os06g13030	1	428	57	26868	0.599991
GO:0016829	lyase activity	molecular_function	4	LOC_Os06g07860	1	428	57	26868	0.599991
GO:0009834	plant-type secondary cell wall biogenesis	biological_process	7	LOC_Os05g07060	1	428	57	26868	0.599991
GO:0009579	thylakoid	cellular_component	5	LOC_Os02g51710;LOC_Os03g17070	2	428	127	26868	0.603045
GO:0005840	ribosome	cellular_component	6	LOC_Os11g34940	1	428	59	26868	0.61266
GO:0007264	small GTPase mediated signal transduction	biological_process	6	LOC_Os01g47730	1	428	59	26868	0.61266
GO:0071944	cell periphery	cellular_component	4	LOC_Os01g57854	1	428	59	26868	0.61266
GO:0016310	phosphorylation	biological_process	7	LOC_Os08g24310;LOC_Os06g04920;LOC_Os04g45730;LOC_Os02g10920	4	428	269	26868	0.623187
GO:0006486	protein glycosylation	biological_process	9	LOC_Os09g27950	1	428	61	26868	0.624929
GO:0010287	plastoglobule	cellular_component	8	LOC_Os07g04990	1	428	61	26868	0.624929
GO:0042542	response to hydrogen peroxide	biological_process	7	LOC_Os09g16510	1	428	61	26868	0.624929
GO:0000981	DNA-binding transcription factor activity, RNA polymerase II-specific	molecular_function	5	LOC_Os12g03290	1	428	61	26868	0.624929
GO:0006629	lipid metabolic process	biological_process	5	LOC_Os02g43700;LOC_Os12g26290	2	428	134	26868	0.632209
GO:0009832	plant-type cell wall biogenesis	biological_process	6	LOC_Os02g25630	1	428	63	26868	0.636811
GO:0004190	aspartic-type endopeptidase activity	molecular_function	8	LOC_Os06g03120;LOC_Os11g08100;LOC_Os04g45270;LOC_Os05g33400	4	428	274	26868	0.637533
GO:0000932	P-body	cellular_component	8	LOC_Os05g45020	1	428	64	26868	0.64261
GO:0009416	response to light stimulus	biological_process	6	LOC_Os06g11860;LOC_Os02g11070;LOC_Os03g60080	3	428	208	26868	0.646376
GO:0016298	lipase activity	molecular_function	6	LOC_Os01g54470	1	428	65	26868	0.648316
GO:0005773	vacuole	cellular_component	6	LOC_Os02g51710;LOC_Os04g30420;LOC_Os01g68500;LOC_Os03g19270;LOC_Os05g31760;LOC_Os01g11230	6	428	418	26868	0.657272
GO:0004722	protein serine/threonine phosphatase activity	molecular_function	9	LOC_Os03g10950;LOC_Os11g15570	2	428	142	26868	0.663463
GO:0009909	regulation of flower development	biological_process	8	LOC_Os04g45330	1	428	68	26868	0.664897
GO:0001228	DNA-binding transcription activator activity, RNA polymerase II-specific	molecular_function	6	LOC_Os01g54210	1	428	68	26868	0.664897
GO:0006887	exocytosis	biological_process	7	LOC_Os08g13570	1	428	69	26868	0.670249
GO:0005622	intracellular	cellular_component	4	LOC_Os06g11210;LOC_Os12g25200;LOC_Os04g52090;LOC_Os01g27230	4	428	286	26868	0.67049
GO:0016020	membrane	cellular_component	3	LOC_Os01g40070;LOC_Os07g38130;LOC_Os01g16170;LOC_Os05g36260;LOC_Os10g39640;LOC_Os03g63310;LOC_Os10g36960;LOC_Os10g33040;LOC_Os05g51520;LOC_Os10g36980;LOC_Os09g25760;LOC_Os02g30780;LOC_Os03g17070;LOC_Os03g21820;LOC_Os09g27580;LOC_Os04g32920;LOC_Os07g42250;LOC_Os05g35650;LOC_Os05g44770	19	428	1294	26868	0.675384
GO:0030163	protein catabolic process	biological_process	7	LOC_Os11g08100;LOC_Os04g45270;LOC_Os05g33400;LOC_Os06g03120	4	428	289	26868	0.6784
GO:0008233	peptidase activity	molecular_function	5	LOC_Os02g08270	1	428	71	26868	0.680697
GO:0015979	photosynthesis	biological_process	5	LOC_Os01g70820	1	428	71	26868	0.680697
GO:0042744	hydrogen peroxide catabolic process	biological_process	8	LOC_Os03g13210	1	428	72	26868	0.685797
GO:0005887	integral component of plasma membrane	cellular_component	6	LOC_Os07g37320;LOC_Os10g30790;LOC_Os07g39350;LOC_Os04g43210;LOC_Os03g11900	5	428	364	26868	0.690867
GO:0004672	protein kinase activity	molecular_function	7	LOC_Os01g66760;LOC_Os07g29330;LOC_Os02g45750;LOC_Os03g17700	4	428	295	26868	0.693821
GO:0003690	double-stranded DNA binding	molecular_function	7	LOC_Os05g34160	1	428	75	26868	0.700614
GO:0009860	pollen tube growth	biological_process	8	LOC_Os07g41590	1	428	76	26868	0.705397
GO:0009706	chloroplast inner membrane	cellular_component	7	LOC_Os04g30420	1	428	76	26868	0.705397
GO:0043161	proteasome-mediated ubiquitin-dependent protein catabolic process	biological_process	11	LOC_Os02g45780;LOC_Os01g74040;LOC_Os01g16950;LOC_Os08g38460	4	428	301	26868	0.708709
GO:0005623	cell	cellular_component	3	LOC_Os05g13320	1	428	77	26868	0.710103
GO:0015035	protein disulfide oxidoreductase activity	molecular_function	7	LOC_Os01g47760	1	428	77	26868	0.710103
GO:0016567	protein ubiquitination	biological_process	11	LOC_Os04g34140;LOC_Os07g37400;LOC_Os06g06490;LOC_Os05g36360;LOC_Os09g31200;LOC_Os01g09800	6	428	446	26868	0.71673
GO:0046983	protein dimerization activity	molecular_function	5	LOC_Os01g50940	1	428	79	26868	0.719292
GO:0005507	copper ion binding	molecular_function	8	LOC_Os01g63190;LOC_Os11g06590	2	428	158	26868	0.719527
GO:0005777	peroxisome	cellular_component	7	LOC_Os07g17330;LOC_Os03g03790	2	428	160	26868	0.725954
GO:0035556	intracellular signal transduction	biological_process	5	LOC_Os03g03510;LOC_Os07g39520	2	428	170	26868	0.756242
GO:0009658	chloroplast organization	biological_process	7	LOC_Os07g29330	1	428	90	26868	0.764875
GO:0003779	actin binding	molecular_function	6	LOC_Os01g07370	1	428	90	26868	0.764875
GO:0016787	hydrolase activity	molecular_function	4	LOC_Os05g42230;LOC_Os03g49440;LOC_Os03g17070;LOC_Os01g08780;LOC_Os03g10620	5	428	402	26868	0.769696
GO:0005802	trans-Golgi network	cellular_component	7	LOC_Os01g51870;LOC_Os03g19310;LOC_Os01g48610	3	428	254	26868	0.772314
GO:0042631	cellular response to water deprivation	biological_process	6	LOC_Os10g37340	1	428	96	26868	0.786543
GO:0005768	endosome	cellular_component	7	LOC_Os01g51870;LOC_Os03g19310;LOC_Os01g48610	3	428	261	26868	0.787854
GO:0045454	cell redox homeostasis	biological_process	5	LOC_Os01g47760	1	428	97	26868	0.789955
GO:0022627	cytosolic small ribosomal subunit	cellular_component	8	LOC_Os07g10660	1	428	97	26868	0.789955
GO:0006810	transport	biological_process	5	LOC_Os07g34070;LOC_Os02g47500	2	428	191	26868	0.810546
GO:0003682	chromatin binding	molecular_function	4	LOC_Os01g54210	1	428	107	26868	0.821225
GO:0007166	cell surface receptor signaling pathway	biological_process	5	LOC_Os04g58890;LOC_Os11g44560	2	428	196	26868	0.821777
GO:0006470	protein dephosphorylation	biological_process	9	LOC_Os03g10950	1	428	110	26868	0.829667
GO:0009813	flavonoid biosynthetic process	biological_process	6	LOC_Os07g34260;LOC_Os01g53460;LOC_Os04g53810;LOC_Os01g53330	4	428	366	26868	0.837065
GO:0042802	identical protein binding	molecular_function	5	LOC_Os07g34260;LOC_Os07g44690;LOC_Os11g14380	3	428	289	26868	0.841448
GO:0071555	cell wall organization	biological_process	6	LOC_Os11g33270;LOC_Os09g23220	2	428	206	26868	0.842463
GO:0061630	ubiquitin protein ligase activity	molecular_function	7	LOC_Os01g16950;LOC_Os08g38460;LOC_Os01g74040;LOC_Os02g45780	4	428	373	26868	0.847563
GO:0005524	ATP binding	molecular_function	5	LOC_Os07g29330;LOC_Os11g06590;LOC_Os08g24310;LOC_Os02g18070;LOC_Os10g33040;LOC_Os01g66760;LOC_Os03g19270;LOC_Os12g28710;LOC_Os02g48210;LOC_Os12g02200;LOC_Os03g47140;LOC_Os11g12320;LOC_Os04g58710;LOC_Os06g50100;LOC_Os12g31860;LOC_Os07g04040;LOC_Os05g44770;LOC_Os02g45750;LOC_Os06g17490;LOC_Os03g17700;LOC_Os11g11960;LOC_Os11g02240;LOC_Os12g17430;LOC_Os04g43440	24	428	1807	26868	0.848732
GO:0009733	response to auxin	biological_process	6	LOC_Os04g43680;LOC_Os08g38220	2	428	211	26868	0.85197
GO:0009793	embryo development ending in seed dormancy	biological_process	5	LOC_Os11g13930;LOC_Os03g06360;LOC_Os05g50710	3	428	308	26868	0.870784
GO:0006412	translation	biological_process	8	LOC_Os11g34940;LOC_Os07g43310;LOC_Os07g10660	3	428	310	26868	0.873575
GO:0009534	chloroplast thylakoid	cellular_component	7	LOC_Os03g17070	1	428	133	26868	0.882465
GO:0000139	Golgi membrane	cellular_component	7	LOC_Os03g19310;LOC_Os09g27950	2	428	233	26868	0.887883
GO:0009826	unidimensional cell growth	biological_process	7	LOC_Os03g21820	1	428	137	26868	0.889813
GO:0071472	cellular response to salt stress	biological_process	7	LOC_Os06g11860	1	428	139	26868	0.893313
GO:0030154	cell differentiation	biological_process	5	LOC_Os01g54210	1	428	140	26868	0.895021
GO:0043231	intracellular membrane-bounded organelle	cellular_component	5	LOC_Os01g53330;LOC_Os01g63930;LOC_Os05g37250;LOC_Os01g53460	4	428	411	26868	0.895065
GO:0009705	plant-type vacuole membrane	cellular_component	8	LOC_Os12g25200	1	428	141	26868	0.896702
GO:0007169	transmembrane receptor protein tyrosine kinase signaling pathway	biological_process	7	LOC_Os01g66760;LOC_Os08g24310	2	428	243	26868	0.901382
GO:0003924	GTPase activity	molecular_function	9	LOC_Os01g47730	1	428	144	26868	0.901586
GO:0008757	S-adenosylmethionine-dependent methyltransferase activity	molecular_function	7	LOC_Os01g51870	1	428	150	26868	0.910673
GO:0016887	ATPase activity	molecular_function	9	LOC_Os12g28710	1	428	152	26868	0.913512
GO:0005525	GTP binding	molecular_function	8	LOC_Os01g47730	1	428	155	26868	0.917603
GO:0004842	ubiquitin-protein transferase activity	molecular_function	6	LOC_Os05g08010;LOC_Os11g14140;LOC_Os04g34140;LOC_Os09g31200;LOC_Os06g06490;LOC_Os05g36360	6	428	614	26868	0.928049
GO:0012505	endomembrane system	cellular_component	4	LOC_Os11g12320	1	428	166	26868	0.931018
GO:0071013	catalytic step 2 spliceosome	cellular_component	7	LOC_Os02g14780	1	428	166	26868	0.931018
GO:0004252	serine-type endopeptidase activity	molecular_function	8	LOC_Os04g03810;LOC_Os10g33140	2	428	272	26868	0.932442
GO:0005975	carbohydrate metabolic process	biological_process	5	LOC_Os02g01510	1	428	169	26868	0.934282
GO:0006508	proteolysis	biological_process	7	LOC_Os04g45270;LOC_Os05g33400;LOC_Os11g08100;LOC_Os06g03120	4	428	457	26868	0.934816
GO:0006886	intracellular protein transport	biological_process	10	LOC_Os01g47730	1	428	179	26868	0.94409
GO:0080044	quercetin 7-O-glucosyltransferase activity	molecular_function	8	LOC_Os01g53330;LOC_Os01g53460	2	428	290	26868	0.9468
GO:0080043	quercetin 3-O-glucosyltransferase activity	molecular_function	8	LOC_Os01g53460;LOC_Os01g53330	2	428	290	26868	0.9468
GO:0009941	chloroplast envelope	cellular_component	7	LOC_Os04g30420;LOC_Os03g17070;LOC_Os07g04990	3	428	395	26868	0.95226
GO:0052696	flavonoid glucuronidation	biological_process	6	LOC_Os01g53330;LOC_Os01g53460	2	428	319	26868	0.964008
GO:0006457	protein folding	biological_process	4	LOC_Os06g50230	1	428	210	26868	0.966138
GO:0005794	Golgi apparatus	cellular_component	6	LOC_Os02g25630;LOC_Os09g27950;LOC_Os03g19310;LOC_Os08g37840;LOC_Os04g30420;LOC_Os01g61920;LOC_Os09g25760;LOC_Os02g52010;LOC_Os01g48610	9	428	955	26868	0.969702
GO:0009536	plastid	cellular_component	6	LOC_Os05g35580;LOC_Os01g64120;LOC_Os09g36982	3	428	435	26868	0.970584
GO:0016021	integral component of membrane	cellular_component	5	LOC_Os03g19310;LOC_Os04g51150;LOC_Os07g17330;LOC_Os08g05910;LOC_Os02g11070;LOC_Os09g36982;LOC_Os05g44770;LOC_Os06g04990;LOC_Os10g40640;LOC_Os01g69870;LOC_Os12g28710;LOC_Os01g37590;LOC_Os12g31860;LOC_Os06g17490;LOC_Os08g24310;LOC_Os05g35650;LOC_Os09g25760;LOC_Os03g58580;LOC_Os02g48210;LOC_Os09g27950;LOC_Os01g29330;LOC_Os01g48610;LOC_Os02g45750;LOC_Os05g37250;LOC_Os01g66760;LOC_Os01g50100;LOC_Os08g…	40	428	3260	26868	0.971681
GO:0003676	nucleic acid binding	molecular_function	5	LOC_Os05g45020;LOC_Os03g49170	2	428	348	26868	0.975803
GO:0005730	nucleolus	cellular_component	6	LOC_Os03g06360	1	428	268	26868	0.98677
GO:0000166	nucleotide binding	molecular_function	5	LOC_Os11g12320;LOC_Os02g35200	2	428	406	26868	0.989238
GO:0003723	RNA binding	molecular_function	6	LOC_Os02g14780;LOC_Os09g36700;LOC_Os09g36680	3	428	530	26868	0.991146
GO:0031146	SCF-dependent proteasomal ubiquitin-dependent protein catabolic process	biological_process	12	LOC_Os05g08010	1	428	329	26868	0.995087
GO:0019005	SCF ubiquitin ligase complex	cellular_component	7	LOC_Os05g08010	1	428	367	26868	0.997352
GO:0005739	mitochondrion	cellular_component	6	LOC_Os07g17330;LOC_Os01g69870;LOC_Os04g58710;LOC_Os06g04990;LOC_Os01g22900;LOC_Os05g34160;LOC_Os02g54870;LOC_Os06g05020;LOC_Os09g36982;LOC_Os04g51150;LOC_Os07g46852;LOC_Os01g63690;LOC_Os03g03790;LOC_Os11g06590;LOC_Os02g54820;LOC_Os12g31860	16	428	1813	26868	0.997456
GO:0051015	actin filament binding	molecular_function	7	LOC_Os06g13030	1	428	420	26868	0.998884
GO:0005783	endoplasmic reticulum	cellular_component	6	LOC_Os07g42250;LOC_Os11g44940	2	428	570	26868	0.999

## Sheet: Table S3-3
Table S3-3 GO enrichment analysis of R0_R24-up DEGs.
GO_ID	GO_Term	GO_function	GO_class	Genes	S gene number	TS gene number	B gene number	TB gene number	pvalue
GO:0009611	response to wounding	biological_process	5	LOC_Os05g35290;LOC_Os04g43800;LOC_Os04g54240;LOC_Os10g25290;LOC_Os03g08320;LOC_Os05g37250;LOC_Os06g11860;LOC_Os06g20960;LOC_Os03g60080;LOC_Os04g37430;LOC_Os08g39850;LOC_Os01g60020;LOC_Os04g54300;LOC_Os01g63930;LOC_Os03g17700;LOC_Os02g48770;LOC_Os08g33160;LOC_Os03g28940	18	430	228	26868	3.35133e-08
GO:0010200	response to chitin	biological_process	7	LOC_Os10g41330;LOC_Os04g21950;LOC_Os01g14440;LOC_Os09g16510;LOC_Os05g27730;LOC_Os03g17700;LOC_Os06g51070;LOC_Os04g34140;LOC_Os03g04070;LOC_Os05g25770;LOC_Os01g53920;LOC_Os01g61080	12	430	107	26868	1.5255e-07
GO:0050832	defense response to fungus	biological_process	8	LOC_Os04g58710;LOC_Os05g25770;LOC_Os05g27730;LOC_Os05g46020;LOC_Os11g35450;LOC_Os10g39680;LOC_Os09g39960;LOC_Os01g53920;LOC_Os11g40840;LOC_Os12g26290;LOC_Os03g58580;LOC_Os03g04060;LOC_Os11g35410;LOC_Os01g61080	14	430	190	26868	2.55504e-06
GO:0006979	response to oxidative stress	biological_process	5	LOC_Os05g44900;LOC_Os06g35520;LOC_Os05g35290;LOC_Os01g01660;LOC_Os04g49370;LOC_Os12g36870;LOC_Os03g13210;LOC_Os01g63690;LOC_Os04g41960;LOC_Os03g17700;LOC_Os12g26290;LOC_Os10g02070;LOC_Os04g43800;LOC_Os01g53730	14	430	194	26868	3.26185e-06
GO:0006952	defense response	biological_process	5	LOC_Os07g35370;LOC_Os12g06220;LOC_Os12g30070;LOC_Os12g28100;LOC_Os02g08440;LOC_Os09g25070;LOC_Os05g44270;LOC_Os11g45740;LOC_Os11g12320;LOC_Os02g18070;LOC_Os05g35290;LOC_Os07g35290;LOC_Os05g30970;LOC_Os01g53920;LOC_Os11g11960;LOC_Os07g35004;LOC_Os07g35310;LOC_Os11g35410;LOC_Os01g03690;LOC_Os04g43800;LOC_Os01g28500;LOC_Os04g37430;LOC_Os11g35450;LOC_Os07g35390;LOC_Os09g24330;LOC_Os06g11240;LOC_Os11g…	32	430	835	26868	5.65831e-06
GO:0009751	response to salicylic acid	biological_process	6	LOC_Os05g25770;LOC_Os04g44910;LOC_Os12g26290;LOC_Os02g06640;LOC_Os03g56160;LOC_Os03g60080;LOC_Os01g63690;LOC_Os04g40630;LOC_Os09g16510;LOC_Os07g03840;LOC_Os01g47760;LOC_Os04g44900	12	430	166	26868	1.60504e-05
GO:0005886	plasma membrane	cellular_component	4	LOC_Os08g01120;LOC_Os03g13840;LOC_Os08g10290;LOC_Os09g24330;LOC_Os08g03350;LOC_Os02g03410;LOC_Os07g35290;LOC_Os03g56160;LOC_Os12g43640;LOC_Os01g42380;LOC_Os01g66760;LOC_Os11g31540;LOC_Os06g08120;LOC_Os01g62430;LOC_Os04g36040;LOC_Os08g26840;LOC_Os08g05910;LOC_Os07g35004;LOC_Os03g58790;LOC_Os06g13030;LOC_Os03g48270;LOC_Os04g44900;LOC_Os07g35260;LOC_Os04g44910;LOC_Os01g53920;LOC_Os08g13570;LOC_Os10g…	88	430	3569	26868	2.02275e-05
GO:0006950	response to stress	biological_process	4	LOC_Os01g19820;LOC_Os01g04280;LOC_Os12g36110;LOC_Os05g28740;LOC_Os03g19270;LOC_Os11g44600;LOC_Os12g36910	7	430	57	26868	3.39681e-05
GO:0009506	plasmodesma	cellular_component	5	LOC_Os09g24330;LOC_Os05g34270;LOC_Os08g43190;LOC_Os09g39960;LOC_Os02g57720;LOC_Os08g37840;LOC_Os12g36870;LOC_Os10g41230;LOC_Os04g55159;LOC_Os03g03280;LOC_Os12g06220;LOC_Os07g35680;LOC_Os03g58580;LOC_Os05g11010;LOC_Os07g35260;LOC_Os04g34140;LOC_Os09g25760;LOC_Os07g35004;LOC_Os07g35370;LOC_Os10g39640;LOC_Os07g35290;LOC_Os07g35390;LOC_Os03g56250;LOC_Os01g03690;LOC_Os10g33040;LOC_Os07g35310;LOC_Os04g…	29	430	791	26868	3.49893e-05
GO:0048281	inflorescence morphogenesis	biological_process	5	LOC_Os11g40840;LOC_Os06g51070;LOC_Os03g04070	3	430	5	26868	3.97466e-05
GO:0031347	regulation of defense response	biological_process	7	LOC_Os03g28940;LOC_Os05g25770;LOC_Os03g08320;LOC_Os08g33160;LOC_Os10g25290;LOC_Os09g16510;LOC_Os11g34080	7	430	63	26868	6.54644e-05
GO:0030247	polysaccharide binding	molecular_function	5	LOC_Os01g51570;LOC_Os03g45390;LOC_Os05g31140;LOC_Os01g71350;LOC_Os01g71670;LOC_Os08g14700;LOC_Os03g57880;LOC_Os01g71340;LOC_Os04g33640	9	430	110	26868	7.07223e-05
GO:0031408	oxylipin biosynthetic process	biological_process	11	LOC_Os12g26290;LOC_Os06g11240;LOC_Os06g20960;LOC_Os02g48770;LOC_Os04g37430	5	430	31	26868	0.00012366
GO:0003700	DNA-binding transcription factor activity	molecular_function	4	LOC_Os03g08490;LOC_Os01g54600;LOC_Os01g60640;LOC_Os03g04070;LOC_Os11g45740;LOC_Os09g25070;LOC_Os01g04800;LOC_Os06g45890;LOC_Os01g61080;LOC_Os09g16510;LOC_Os10g41330;LOC_Os02g40530;LOC_Os06g11860;LOC_Os04g21950;LOC_Os03g08500;LOC_Os11g29870;LOC_Os01g01870;LOC_Os02g08440;LOC_Os01g60020;LOC_Os05g46020;LOC_Os05g41780;LOC_Os01g49830;LOC_Os02g45760;LOC_Os10g41230;LOC_Os06g51070;LOC_Os11g44680;LOC_Os04g…	40	430	1353	26868	0.000151977
GO:0009620	response to fungus	biological_process	7	LOC_Os03g60080;LOC_Os04g46220;LOC_Os11g44680;LOC_Os11g45740;LOC_Os03g18770;LOC_Os04g37430	6	430	52	26868	0.000177286
GO:0010120	camalexin biosynthetic process	biological_process	9	LOC_Os05g27730;LOC_Os01g61080;LOC_Os03g17700	3	430	8	26868	0.000214733
GO:0045792	negative regulation of cell size	biological_process	7	LOC_Os03g04070;LOC_Os06g51070	2	430	2	26868	0.000255547
GO:1903507	negative regulation of nucleic acid-templated transcription	biological_process	10	LOC_Os03g28940;LOC_Os03g08320;LOC_Os10g25290;LOC_Os08g33160	4	430	21	26868	0.000311993
GO:0009414	response to water deprivation	biological_process	5	LOC_Os03g04770;LOC_Os06g11860;LOC_Os02g44870;LOC_Os03g23010;LOC_Os08g05910;LOC_Os12g24320;LOC_Os01g28500;LOC_Os01g61080;LOC_Os05g27730;LOC_Os03g13840;LOC_Os09g31200;LOC_Os12g03290	12	430	235	26868	0.000438495
GO:0045551	cinnamyl-alcohol dehydrogenase activity	molecular_function	7	LOC_Os09g23560;LOC_Os06g44180;LOC_Os06g44170;LOC_Os04g15920	4	430	23	26868	0.000450071
GO:0046658	anchored component of plasma membrane	cellular_component	6	LOC_Os01g71340;LOC_Os10g35460;LOC_Os04g33640;LOC_Os03g45390;LOC_Os08g14700;LOC_Os01g51570;LOC_Os01g71670;LOC_Os01g71350;LOC_Os03g57880;LOC_Os05g31140;LOC_Os09g39940;LOC_Os12g06220	12	430	237	26868	0.000472973
GO:0016799	hydrolase activity, hydrolyzing N-glycosyl compounds	molecular_function	6	LOC_Os03g01880;LOC_Os09g37540;LOC_Os03g64070	3	430	11	26868	0.000610442
GO:0070370	cellular heat acclimation	biological_process	7	LOC_Os11g40840;LOC_Os01g61080;LOC_Os05g27730	3	430	11	26868	0.000610442
GO:0009691	cytokinin biosynthetic process	biological_process	7	LOC_Os03g01880;LOC_Os03g64070;LOC_Os09g37540	3	430	11	26868	0.000610442
GO:0005516	calmodulin binding	molecular_function	5	LOC_Os03g48270;LOC_Os04g40630;LOC_Os01g04280;LOC_Os02g03410;LOC_Os04g21950;LOC_Os12g36910;LOC_Os11g44680;LOC_Os03g13300;LOC_Os12g36110;LOC_Os11g44600	10	430	180	26868	0.000678876
GO:0003714	transcription corepressor activity	molecular_function	5	LOC_Os03g28940;LOC_Os08g33160;LOC_Os10g25290;LOC_Os03g08320	4	430	27	26868	0.000848063
GO:0016747	transferase activity, transferring acyl groups other than amino-acyl groups	molecular_function	6	LOC_Os01g63480;LOC_Os06g15170;LOC_Os09g34930;LOC_Os06g39390;LOC_Os02g11070;LOC_Os05g08640;LOC_Os10g35950;LOC_Os05g37660	8	430	125	26868	0.000929947
GO:0005355	glucose transmembrane transporter activity	molecular_function	9	LOC_Os03g11900;LOC_Os07g37320;LOC_Os07g01560;LOC_Os03g10100;LOC_Os07g39350;LOC_Os04g37980	6	430	71	26868	0.000966586
GO:0046323	glucose import	biological_process	12	LOC_Os03g10100;LOC_Os03g11900;LOC_Os07g37320;LOC_Os07g01560;LOC_Os07g39350;LOC_Os04g37980	6	430	71	26868	0.000966586
GO:0006468	protein phosphorylation	biological_process	9	LOC_Os04g56110;LOC_Os07g03840;LOC_Os01g03690;LOC_Os02g48210;LOC_Os08g25430;LOC_Os07g35390;LOC_Os07g35004;LOC_Os11g07225;LOC_Os07g35260;LOC_Os07g35370;LOC_Os04g44910;LOC_Os11g40840;LOC_Os05g44770;LOC_Os03g56250;LOC_Os03g56160;LOC_Os12g43640;LOC_Os09g39650;LOC_Os03g03510;LOC_Os04g44900;LOC_Os02g14480;LOC_Os01g66760;LOC_Os09g24330;LOC_Os07g35680;LOC_Os04g34270;LOC_Os10g33040;LOC_Os07g35290;LOC_Os01g…	34	430	1222	26868	0.00134499
GO:0051245	negative regulation of cellular defense response	biological_process	9	LOC_Os05g44270;LOC_Os03g46440	2	430	4	26868	0.00150091
GO:0009505	plant-type cell wall	cellular_component	6	LOC_Os09g39760;LOC_Os10g39640;LOC_Os04g59260;LOC_Os04g59150;LOC_Os10g35460;LOC_Os08g02110;LOC_Os10g35070;LOC_Os01g57730;LOC_Os03g56250;LOC_Os03g04020;LOC_Os02g52010;LOC_Os08g37840	12	430	271	26868	0.00151168
GO:2000022	regulation of jasmonic acid mediated signaling pathway	biological_process	8	LOC_Os08g33160;LOC_Os03g08320;LOC_Os10g25290;LOC_Os03g28940	4	430	33	26868	0.00183343
GO:0004674	protein serine/threonine kinase activity	molecular_function	8	LOC_Os01g54700;LOC_Os12g43440;LOC_Os03g56160;LOC_Os07g35310;LOC_Os02g14480;LOC_Os01g04580;LOC_Os11g03820;LOC_Os03g56250;LOC_Os07g35260;LOC_Os07g35290;LOC_Os08g24310;LOC_Os03g03510;LOC_Os01g66760;LOC_Os07g35680;LOC_Os08g25430;LOC_Os04g34270;LOC_Os04g56110;LOC_Os05g44770;LOC_Os04g44910;LOC_Os06g50100;LOC_Os04g58890;LOC_Os04g30250;LOC_Os08g10290;LOC_Os07g35370;LOC_Os09g24330;LOC_Os07g03840;LOC_Os01g…	38	430	1453	26868	0.00213795
GO:0010224	response to UV-B	biological_process	8	LOC_Os03g17700;LOC_Os04g43800;LOC_Os02g06640;LOC_Os05g35290;LOC_Os11g44680	5	430	59	26868	0.00252657
GO:0008061	chitin binding	molecular_function	5	LOC_Os03g04060;LOC_Os06g25010;LOC_Os10g39680;LOC_Os02g45750;LOC_Os10g28080	5	430	60	26868	0.00272066
GO:0051762	sesquiterpene biosynthetic process	biological_process	10	LOC_Os04g27670;LOC_Os04g01810;LOC_Os04g27190	3	430	18	26868	0.00277786
GO:0004553	hydrolase activity, hydrolyzing O-glycosyl compounds	molecular_function	6	LOC_Os01g71670;LOC_Os03g57880;LOC_Os01g51570;LOC_Os08g14700;LOC_Os03g45390;LOC_Os01g71340;LOC_Os01g71350;LOC_Os05g31140;LOC_Os04g33640	9	430	184	26868	0.00296536
GO:0009695	jasmonic acid biosynthetic process	biological_process	10	LOC_Os06g11240;LOC_Os06g20960;LOC_Os02g48770;LOC_Os04g37430	4	430	38	26868	0.00310604
GO:0004568	chitinase activity	molecular_function	7	LOC_Os06g25010;LOC_Os04g41640;LOC_Os10g39680;LOC_Os03g04060;LOC_Os10g28080	5	430	62	26868	0.00314087
GO:0043565	sequence-specific DNA binding	molecular_function	7	LOC_Os03g27080;LOC_Os05g46020;LOC_Os01g14440;LOC_Os01g54600;LOC_Os05g27730;LOC_Os11g44680;LOC_Os01g60640;LOC_Os01g61080;LOC_Os02g09830;LOC_Os02g45760;LOC_Os10g41230;LOC_Os06g11860;LOC_Os05g25770;LOC_Os04g21950;LOC_Os09g16510	15	430	417	26868	0.00319788
GO:0005351	carbohydrate:proton symporter activity	molecular_function	7	LOC_Os07g37320;LOC_Os07g39350;LOC_Os07g01560;LOC_Os03g11900;LOC_Os04g37980;LOC_Os03g10100	6	430	90	26868	0.0032616
GO:0016874	ligase activity	molecular_function	4	LOC_Os02g34410;LOC_Os09g39650;LOC_Os11g34080;LOC_Os04g34140;LOC_Os03g01140;LOC_Os10g40490;LOC_Os03g03790	7	430	129	26868	0.0048176
GO:0004834	tryptophan synthase activity	molecular_function	7	LOC_Os03g58290;LOC_Os03g58300	2	430	7	26868	0.00508822
GO:0010508	positive regulation of autophagy	biological_process	9	LOC_Os01g61080;LOC_Os05g27730	2	430	7	26868	0.00508822
GO:0016702	oxidoreductase activity, acting on single donors with incorporation of molecular oxygen, incorporation of two atoms of oxygen	molecular_function	6	LOC_Os02g47510;LOC_Os12g26290	2	430	7	26868	0.00508822
GO:0020037	heme binding	molecular_function	6	LOC_Os05g37250;LOC_Os01g11230;LOC_Os10g02070;LOC_Os03g13210;LOC_Os12g26290;LOC_Os01g72260;LOC_Os06g35520;LOC_Os01g63930	8	430	167	26868	0.00562368
GO:0009964	negative regulation of flavonoid biosynthetic process	biological_process	8	LOC_Os04g53810;LOC_Os04g53850	2	430	8	26868	0.00671272
GO:0033729	anthocyanidin reductase activity	molecular_function	7	LOC_Os04g53810;LOC_Os04g53850	2	430	8	26868	0.00671272
GO:0010183	pollen tube guidance	biological_process	4	LOC_Os03g17700;LOC_Os03g29190;LOC_Os10g33040	3	430	25	26868	0.00720801
GO:0010334	sesquiterpene synthase activity	molecular_function	8	LOC_Os04g27670;LOC_Os04g27190;LOC_Os04g01810	3	430	26	26868	0.00805275
GO:0015706	nitrate transport	biological_process	9	LOC_Os08g05910;LOC_Os05g35650;LOC_Os01g65169	3	430	26	26868	0.00805275
GO:0003333	amino acid transmembrane transport	biological_process	11	LOC_Os04g47780;LOC_Os12g08130;LOC_Os01g63854;LOC_Os01g66010;LOC_Os08g03350	5	430	78	26868	0.00833063
GO:0047274	galactinol-sucrose galactosyltransferase activity	molecular_function	8	LOC_Os12g36870;LOC_Os01g07530	2	430	9	26868	0.00853971
GO:0047461	(+)-delta-cadinene synthase activity	molecular_function	9	LOC_Os04g27190;LOC_Os04g27340	2	430	9	26868	0.00853971
GO:0016161	beta-amylase activity	molecular_function	8	LOC_Os03g04770;LOC_Os03g22790	2	430	9	26868	0.00853971
GO:0018685	alkane 1-monooxygenase activity	molecular_function	7	LOC_Os05g37250;LOC_Os01g63930	2	430	9	26868	0.00853971
GO:1901928	cadinene biosynthetic process	biological_process	11	LOC_Os04g27340;LOC_Os04g27190	2	430	9	26868	0.00853971
GO:0046686	response to cadmium ion	biological_process	7	LOC_Os12g24650;LOC_Os03g13300;LOC_Os03g29190;LOC_Os04g49370;LOC_Os04g58710;LOC_Os04g41960;LOC_Os01g53730;LOC_Os09g39960;LOC_Os01g01660;LOC_Os05g44900	10	430	256	26868	0.00858682
GO:0009867	jasmonic acid mediated signaling pathway	biological_process	6	LOC_Os02g48770;LOC_Os06g20960;LOC_Os01g47760;LOC_Os05g46020	4	430	51	26868	0.00893926
GO:0004601	peroxidase activity	molecular_function	4	LOC_Os12g26290;LOC_Os04g59150;LOC_Os10g02070;LOC_Os08g02110;LOC_Os01g57730;LOC_Os06g35520;LOC_Os04g59260;LOC_Os03g13210	8	430	182	26868	0.00925224
GO:0051707	response to other organism	biological_process	6	LOC_Os03g14050;LOC_Os08g39850;LOC_Os12g38150;LOC_Os12g26290	4	430	52	26868	0.00956446
GO:0015171	amino acid transmembrane transporter activity	molecular_function	7	LOC_Os01g63854;LOC_Os04g47780;LOC_Os12g08130;LOC_Os01g66010;LOC_Os08g03350	5	430	81	26868	0.00972716
GO:0046244	salicylic acid catabolic process	biological_process	8	LOC_Os05g35290;LOC_Os04g43800	2	430	10	26868	0.0105623
GO:0046274	lignin catabolic process	biological_process	8	LOC_Os04g43800;LOC_Os05g35290	2	430	10	26868	0.0105623
GO:0009800	cinnamic acid biosynthetic process	biological_process	8	LOC_Os04g43800;LOC_Os05g35290	2	430	10	26868	0.0105623
GO:0045548	phenylalanine ammonia-lyase activity	molecular_function	7	LOC_Os04g43800;LOC_Os05g35290	2	430	10	26868	0.0105623
GO:0055114	oxidation-reduction process	biological_process	4	LOC_Os01g53910;LOC_Os11g06590;LOC_Os08g43190;LOC_Os01g72260;LOC_Os04g41960;LOC_Os02g01510;LOC_Os03g29190;LOC_Os01g01660;LOC_Os01g47760;LOC_Os11g10990;LOC_Os04g15920;LOC_Os04g53850;LOC_Os04g53810;LOC_Os08g28240;LOC_Os05g37250;LOC_Os06g11210;LOC_Os03g13210;LOC_Os12g12560;LOC_Os06g35520;LOC_Os02g47510;LOC_Os10g02070;LOC_Os12g12580;LOC_Os01g63930	23	430	852	26868	0.0108508
GO:0050662	coenzyme binding	molecular_function	5	LOC_Os06g44170;LOC_Os06g44180;LOC_Os04g53850;LOC_Os04g53810	4	430	56	26868	0.012347
GO:0033617	mitochondrial respiratory chain complex IV assembly	biological_process	10	LOC_Os12g02040;LOC_Os11g02080	2	430	11	26868	0.0127738
GO:0015079	potassium ion transmembrane transporter activity	molecular_function	9	LOC_Os09g27580;LOC_Os04g32920;LOC_Os03g37840	3	430	32	26868	0.0143168
GO:0005887	integral component of plasma membrane	cellular_component	6	LOC_Os01g11160;LOC_Os03g10100;LOC_Os07g01560;LOC_Os10g30790;LOC_Os03g11900;LOC_Os02g57720;LOC_Os03g05620;LOC_Os07g37320;LOC_Os07g39350;LOC_Os04g37980;LOC_Os04g43070;LOC_Os01g54700	12	430	364	26868	0.0149854
GO:0030795	jasmonate O-methyltransferase activity	molecular_function	8	LOC_Os02g48770;LOC_Os06g20960	2	430	12	26868	0.0151677
GO:0071456	cellular response to hypoxia	biological_process	6	LOC_Os11g44680;LOC_Os09g29710	2	430	12	26868	0.0151677
GO:0003959	NADPH dehydrogenase activity	molecular_function	6	LOC_Os06g11240;LOC_Os06g11210	2	430	12	26868	0.0151677
GO:0090602	sieve element enucleation	biological_process	7	LOC_Os01g15640	1	430	1	26868	0.0160042
GO:0033611	oxalate catabolic process	biological_process	10	LOC_Os04g58710	1	430	1	26868	0.0160042
GO:0000169	activation of MAPK activity involved in osmosensory signaling pathway	biological_process	14	LOC_Os03g17700	1	430	1	26868	0.0160042
GO:0032440	2-alkenal reductase [NAD(P)] activity	molecular_function	7	LOC_Os04g41960	1	430	1	26868	0.0160042
GO:0015087	cobalt ion transmembrane transporter activity	molecular_function	10	LOC_Os06g36450	1	430	1	26868	0.0160042
GO:0004170	dUTP diphosphatase activity	molecular_function	9	LOC_Os03g46640	1	430	1	26868	0.0160042
GO:0032780	negative regulation of ATPase activity	biological_process	8	LOC_Os02g33070	1	430	1	26868	0.0160042
GO:0071901	negative regulation of protein serine/threonine kinase activity	biological_process	12	LOC_Os03g01740	1	430	1	26868	0.0160042
GO:0010288	response to lead ion	biological_process	7	LOC_Os03g14000	1	430	1	26868	0.0160042
GO:0032107	regulation of response to nutrient levels	biological_process	8	LOC_Os11g29870	1	430	1	26868	0.0160042
GO:0019458	methionine catabolic process via 2-oxobutanoate	biological_process	12	LOC_Os10g37340	1	430	1	26868	0.0160042
GO:0035444	nickel cation transmembrane transport	biological_process	11	LOC_Os06g36450	1	430	1	26868	0.0160042
GO:0006226	dUMP biosynthetic process	biological_process	12	LOC_Os03g46640	1	430	1	26868	0.0160042
GO:0000041	transition metal ion transport	biological_process	9	LOC_Os06g36450	1	430	1	26868	0.0160042
GO:0010055	atrichoblast differentiation	biological_process	8	LOC_Os11g29870	1	430	1	26868	0.0160042
GO:0006824	cobalt ion transport	biological_process	10	LOC_Os06g36450	1	430	1	26868	0.0160042
GO:0055068	cobalt ion homeostasis	biological_process	11	LOC_Os06g36450	1	430	1	26868	0.0160042
GO:0046081	dUTP catabolic process	biological_process	12	LOC_Os03g46640	1	430	1	26868	0.0160042
GO:0034614	cellular response to reactive oxygen species	biological_process	7	LOC_Os12g26290	1	430	1	26868	0.0160042
GO:0032791	lead ion binding	molecular_function	7	LOC_Os03g14000	1	430	1	26868	0.0160042
GO:0018826	methionine gamma-lyase activity	molecular_function	6	LOC_Os10g37340	1	430	1	26868	0.0160042
GO:0001561	fatty acid alpha-oxidation	biological_process	11	LOC_Os12g26290	1	430	1	26868	0.0160042
GO:0050203	oxalate-CoA ligase activity	molecular_function	7	LOC_Os04g58710	1	430	1	26868	0.0160042
GO:0007568	aging	biological_process	4	LOC_Os03g18770;LOC_Os09g25760;LOC_Os02g06640	3	430	35	26868	0.0182403
GO:0042626	ATPase-coupled transmembrane transporter activity	molecular_function	8	LOC_Os11g37700;LOC_Os01g42380;LOC_Os01g50100;LOC_Os08g29570;LOC_Os01g42370;LOC_Os01g42410	6	430	130	26868	0.0184243
GO:0060548	negative regulation of cell death	biological_process	7	LOC_Os05g34270;LOC_Os05g30970	2	430	14	26868	0.0204774
GO:0003825	alpha,alpha-trehalose-phosphate synthase (UDP-forming) activity	molecular_function	8	LOC_Os08g31980;LOC_Os08g34580	2	430	14	26868	0.0204774
GO:0000038	very long-chain fatty acid metabolic process	biological_process	10	LOC_Os06g15170;LOC_Os09g34930	2	430	14	26868	0.0204774
GO:0006541	glutamine metabolic process	biological_process	11	LOC_Os05g35580;LOC_Os04g58280	2	430	14	26868	0.0204774
GO:0009816	defense response to bacterium, incompatible interaction	biological_process	7	LOC_Os11g44680;LOC_Os09g16510;LOC_Os01g63690	3	430	37	26868	0.0211545
GO:0008152	metabolic process	biological_process	3	LOC_Os03g14370;LOC_Os06g11090;LOC_Os08g43430;LOC_Os09g28230;LOC_Os03g15270;LOC_Os07g41590	6	430	140	26868	0.0254318
GO:0009555	pollen development	biological_process	6	LOC_Os04g43800;LOC_Os05g35290;LOC_Os01g54600;LOC_Os04g40630;LOC_Os04g37430;LOC_Os03g17700	6	430	140	26868	0.0254318
GO:0043621	protein self-association	molecular_function	5	LOC_Os12g43640;LOC_Os03g04110;LOC_Os02g48320	3	430	40	26868	0.0259753
GO:0031966	mitochondrial membrane	cellular_component	5	LOC_Os08g01120;LOC_Os12g24320;LOC_Os08g43190	3	430	41	26868	0.027702
GO:0000162	tryptophan biosynthetic process	biological_process	11	LOC_Os03g58290;LOC_Os03g58300	2	430	17	26868	0.0296553
GO:0009685	gibberellin metabolic process	biological_process	10	LOC_Os09g25070;LOC_Os02g08440	2	430	17	26868	0.0296553
GO:0045338	farnesyl diphosphate metabolic process	biological_process	8	LOC_Os04g27190;LOC_Os04g27670	2	430	17	26868	0.0296553
GO:0006355	regulation of transcription, DNA-templated	biological_process	8	LOC_Os01g14440;LOC_Os05g34160;LOC_Os01g61080;LOC_Os09g16510;LOC_Os02g45760;LOC_Os01g32770;LOC_Os06g11860;LOC_Os01g60640;LOC_Os01g60020;LOC_Os02g40530;LOC_Os12g03290;LOC_Os01g54600;LOC_Os03g60080;LOC_Os01g04800;LOC_Os01g15640;LOC_Os02g49440;LOC_Os04g21950;LOC_Os04g45690;LOC_Os06g51070;LOC_Os11g44680;LOC_Os05g27730;LOC_Os10g41330;LOC_Os11g45740;LOC_Os05g03760;LOC_Os10g41230;LOC_Os05g25770;LOC_Os02g…	36	430	1627	26868	0.0312978
GO:0080136	priming of cellular response to stress	biological_process	7	LOC_Os03g17700	1	430	2	26868	0.0317528
GO:0019725	cellular homeostasis	biological_process	4	LOC_Os05g30970	1	430	2	26868	0.0317528
GO:0009970	cellular response to sulfate starvation	biological_process	9	LOC_Os10g37340	1	430	2	26868	0.0317528
GO:0034440	lipid oxidation	biological_process	8	LOC_Os04g37430	1	430	2	26868	0.0317528
GO:0048500	signal recognition particle	cellular_component	6	LOC_Os05g43390	1	430	2	26868	0.0317528
GO:0046030	inositol trisphosphate phosphatase activity	molecular_function	9	LOC_Os01g08780	1	430	2	26868	0.0317528
GO:0080169	cellular response to boron-containing substance deprivation	biological_process	9	LOC_Os01g14440	1	430	2	26868	0.0317528
GO:0000389	mRNA 3'-splice site recognition	biological_process	10	LOC_Os02g14780	1	430	2	26868	0.0317528
GO:0052865	1-deoxy-D-xylulose 5-phosphate biosynthetic process	biological_process	8	LOC_Os07g09190	1	430	2	26868	0.0317528
GO:0030366	molybdopterin synthase activity	molecular_function	7	LOC_Os02g35200	1	430	2	26868	0.0317528
GO:0042030	ATPase inhibitor activity	molecular_function	6	LOC_Os02g33070	1	430	2	26868	0.0317528
GO:0034005	germacrene-A synthase activity	molecular_function	9	LOC_Os04g27190	1	430	2	26868	0.0317528
GO:0004457	lactate dehydrogenase activity	molecular_function	6	LOC_Os02g01510	1	430	2	26868	0.0317528
GO:0009697	salicylic acid biosynthetic process	biological_process	8	LOC_Os11g44680	1	430	2	26868	0.0317528
GO:0004459	L-lactate dehydrogenase activity	molecular_function	7	LOC_Os02g01510	1	430	2	26868	0.0317528
GO:0043620	regulation of DNA-templated transcription in response to stress	biological_process	9	LOC_Os11g29870	1	430	2	26868	0.0317528
GO:2000037	regulation of stomatal complex patterning	biological_process	7	LOC_Os03g17700	1	430	2	26868	0.0317528
GO:0009694	jasmonic acid metabolic process	biological_process	9	LOC_Os06g20960;LOC_Os02g48770	2	430	18	26868	0.033015
GO:0019199	transmembrane receptor protein kinase activity	molecular_function	8	LOC_Os11g31540;LOC_Os11g40840	2	430	19	26868	0.0365156
GO:0006535	cysteine biosynthetic process from serine	biological_process	12	LOC_Os06g36880;LOC_Os01g52260	2	430	19	26868	0.0365156
GO:0030170	pyridoxal phosphate binding	molecular_function	6	LOC_Os03g13300;LOC_Os06g36880;LOC_Os10g37340;LOC_Os03g58290;LOC_Os03g58300	5	430	114	26868	0.0365599
GO:0005737	cytoplasm	cellular_component	5	LOC_Os09g21740;LOC_Os10g02070;LOC_Os12g12580;LOC_Os12g12560;LOC_Os12g36870;LOC_Os01g66860;LOC_Os04g43800;LOC_Os04g39350;LOC_Os02g03410;LOC_Os04g40630;LOC_Os12g36880;LOC_Os08g13570;LOC_Os12g36830;LOC_Os01g01660;LOC_Os01g63690;LOC_Os02g35200;LOC_Os09g39960;LOC_Os04g50760;LOC_Os04g57200;LOC_Os03g48270;LOC_Os11g34080;LOC_Os08g32610;LOC_Os02g34410;LOC_Os02g44820;LOC_Os04g15920;LOC_Os02g48770;LOC_Os03g…	67	430	3380	26868	0.0373529
GO:0016301	kinase activity	molecular_function	6	LOC_Os05g44770;LOC_Os08g24310;LOC_Os09g39650;LOC_Os02g48210;LOC_Os01g66760;LOC_Os11g07225;LOC_Os01g04580;LOC_Os01g66860;LOC_Os03g03280;LOC_Os05g34270;LOC_Os12g43640;LOC_Os06g50100;LOC_Os03g17700;LOC_Os04g44900;LOC_Os07g03840;LOC_Os10g33040;LOC_Os03g56160;LOC_Os04g44910;LOC_Os01g53920;LOC_Os02g45750	20	430	815	26868	0.0400604
GO:0006559	L-phenylalanine catabolic process	biological_process	11	LOC_Os05g35290;LOC_Os04g43800	2	430	20	26868	0.0401518
GO:0033612	receptor serine/threonine kinase binding	molecular_function	6	LOC_Os12g43640;LOC_Os05g34270	2	430	20	26868	0.0401518
GO:0009819	drought recovery	biological_process	6	LOC_Os04g43800;LOC_Os05g35290	2	430	20	26868	0.0401518
GO:0009627	systemic acquired resistance	biological_process	7	LOC_Os01g28500;LOC_Os12g26290	2	430	20	26868	0.0401518
GO:0009644	response to high light intensity	biological_process	8	LOC_Os03g13840;LOC_Os04g37430;LOC_Os03g23010	3	430	48	26868	0.0414452
GO:0008442	3-hydroxyisobutyrate dehydrogenase activity	molecular_function	7	LOC_Os01g53910	1	430	3	26868	0.0472499
GO:0015696	ammonium transport	biological_process	8	LOC_Os04g43070	1	430	3	26868	0.0472499
GO:0018315	molybdenum incorporation into molybdenum-molybdopterin complex	biological_process	10	LOC_Os02g35200	1	430	3	26868	0.0472499
GO:0008661	1-deoxy-D-xylulose-5-phosphate synthase activity	molecular_function	6	LOC_Os07g09190	1	430	3	26868	0.0472499
GO:0016166	phytoene dehydrogenase activity	molecular_function	6	LOC_Os08g39850	1	430	3	26868	0.0472499
GO:0080142	regulation of salicylic acid biosynthetic process	biological_process	9	LOC_Os11g44680	1	430	3	26868	0.0472499
GO:0019760	glucosinolate metabolic process	biological_process	8	LOC_Os02g08270	1	430	3	26868	0.0472499
GO:0010159	specification of animal organ position	biological_process	6	LOC_Os04g45330	1	430	3	26868	0.0472499
GO:0019008	molybdopterin synthase complex	cellular_component	4	LOC_Os02g35200	1	430	3	26868	0.0472499
GO:0016119	carotene metabolic process	biological_process	9	LOC_Os03g03370	1	430	3	26868	0.0472499
GO:1902609	(R)-2-hydroxy-alpha-linolenic acid biosynthetic process	biological_process	12	LOC_Os12g26290	1	430	3	26868	0.0472499
GO:0007229	integrin-mediated signaling pathway	biological_process	6	LOC_Os01g66860	1	430	3	26868	0.0472499
GO:2000027	regulation of animal organ morphogenesis	biological_process	7	LOC_Os11g40840	1	430	3	26868	0.0472499
GO:0016838	carbon-oxygen lyase activity, acting on phosphates	molecular_function	6	LOC_Os04g01810	1	430	3	26868	0.0472499
GO:0052747	sinapyl alcohol dehydrogenase activity	molecular_function	7	LOC_Os04g15920	1	430	3	26868	0.0472499
GO:0015099	nickel cation transmembrane transporter activity	molecular_function	10	LOC_Os06g36450	1	430	3	26868	0.0472499
GO:0004044	amidophosphoribosyltransferase activity	molecular_function	7	LOC_Os05g35580	1	430	3	26868	0.0472499
GO:0010186	positive regulation of cellular defense response	biological_process	9	LOC_Os05g30970	1	430	3	26868	0.0472499
GO:0090603	sieve element differentiation	biological_process	6	LOC_Os01g15640	1	430	3	26868	0.0472499
GO:0010148	transpiration	biological_process	8	LOC_Os11g40840	1	430	3	26868	0.0472499
GO:0015675	nickel cation transport	biological_process	10	LOC_Os06g36450	1	430	3	26868	0.0472499
GO:0031305	integral component of mitochondrial inner membrane	cellular_component	8	LOC_Os11g02080;LOC_Os12g02040	2	430	22	26868	0.0478101
GO:0080163	regulation of protein serine/threonine phosphatase activity	biological_process	12	LOC_Os12g36830;LOC_Os12g36880	2	430	22	26868	0.0478101
GO:0009409	response to cold	biological_process	5	LOC_Os05g27730;LOC_Os12g24320;LOC_Os06g15170;LOC_Os06g11860;LOC_Os01g61080;LOC_Os03g17700;LOC_Os03g13840;LOC_Os02g11070	8	430	250	26868	0.0489331
GO:0042742	defense response to bacterium	biological_process	8	LOC_Os05g34270;LOC_Os11g44680;LOC_Os05g25770;LOC_Os11g40840;LOC_Os01g61080;LOC_Os05g27730;LOC_Os12g26290	7	430	209	26868	0.0518184
GO:0009737	response to abscisic acid	biological_process	6	LOC_Os02g44870;LOC_Os12g26290;LOC_Os11g45740;LOC_Os02g01510;LOC_Os03g14370;LOC_Os11g02540;LOC_Os12g02400;LOC_Os03g58790;LOC_Os12g03290;LOC_Os12g24320	10	430	345	26868	0.052259
GO:0019825	oxygen binding	molecular_function	5	LOC_Os01g72260;LOC_Os05g37250;LOC_Os01g63930	3	430	53	26868	0.0529912
GO:0016740	transferase activity	molecular_function	4	LOC_Os06g45890;LOC_Os01g63480;LOC_Os05g37660;LOC_Os06g39390;LOC_Os05g08640;LOC_Os03g19310	6	430	168	26868	0.0537733
GO:0006351	transcription, DNA-templated	biological_process	8	LOC_Os11g45740;LOC_Os06g11860;LOC_Os04g21950;LOC_Os01g60020;LOC_Os10g41230;LOC_Os05g27730;LOC_Os03g52320;LOC_Os11g29870;LOC_Os06g51070;LOC_Os05g46020;LOC_Os01g50940;LOC_Os01g14440;LOC_Os01g61080;LOC_Os01g60640;LOC_Os01g04800;LOC_Os10g41330;LOC_Os02g49440;LOC_Os12g03110;LOC_Os01g15640;LOC_Os02g48320;LOC_Os03g04070;LOC_Os05g25770;LOC_Os03g60080;LOC_Os06g45890;LOC_Os01g49830;LOC_Os01g54600;LOC_Os09g…	27	430	1215	26868	0.0546336
GO:0009965	leaf morphogenesis	biological_process	6	LOC_Os03g04070;LOC_Os11g40840;LOC_Os06g51070	3	430	54	26868	0.0554672
GO:0010427	abscisic acid binding	molecular_function	6	LOC_Os12g36830;LOC_Os12g36880	2	430	24	26868	0.0559499
GO:0004864	protein phosphatase inhibitor activity	molecular_function	7	LOC_Os12g36830;LOC_Os12g36880	2	430	24	26868	0.0559499
GO:0009407	toxin catabolic process	biological_process	6	LOC_Os09g29200;LOC_Os10g38700;LOC_Os10g38780	3	430	55	26868	0.0579975
GO:0009699	phenylpropanoid biosynthetic process	biological_process	7	LOC_Os12g07580;LOC_Os05g35290;LOC_Os07g42520;LOC_Os04g43800	4	430	92	26868	0.0603978
GO:0005576	extracellular region	cellular_component	3	LOC_Os02g18070;LOC_Os12g26290;LOC_Os03g14050;LOC_Os04g37670;LOC_Os01g28500;LOC_Os11g40840;LOC_Os11g45990;LOC_Os01g72610;LOC_Os01g63930;LOC_Os05g37250;LOC_Os09g39760;LOC_Os10g28080;LOC_Os02g52010;LOC_Os01g66840;LOC_Os01g66760;LOC_Os03g04060;LOC_Os03g03280;LOC_Os02g51710;LOC_Os09g25760;LOC_Os06g27560;LOC_Os06g35520;LOC_Os07g37700;LOC_Os10g02070;LOC_Os02g45750;LOC_Os03g13210;LOC_Os06g25010;LOC_Os10g…	29	430	1338	26868	0.0614435
GO:0004348	glucosylceramidase activity	molecular_function	7	LOC_Os08g01940	1	430	4	26868	0.0624996
GO:0071732	cellular response to nitric oxide	biological_process	8	LOC_Os12g26290	1	430	4	26868	0.0624996
GO:2000038	regulation of stomatal complex development	biological_process	8	LOC_Os03g17700	1	430	4	26868	0.0624996
GO:0032957	inositol trisphosphate metabolic process	biological_process	8	LOC_Os01g08780	1	430	4	26868	0.0624996
GO:0008843	endochitinase activity	molecular_function	8	LOC_Os10g39680	1	430	4	26868	0.0624996
GO:0019166	trans-2-enoyl-CoA reductase (NADPH) activity	molecular_function	7	LOC_Os11g06590	1	430	4	26868	0.0624996
GO:0010450	inflorescence meristem growth	biological_process	5	LOC_Os04g45330	1	430	4	26868	0.0624996
GO:0006680	glucosylceramide catabolic process	biological_process	12	LOC_Os08g01940	1	430	4	26868	0.0624996
GO:0009930	longitudinal side of cell surface	cellular_component	4	LOC_Os10g35460	1	430	4	26868	0.0624996
GO:0004861	cyclin-dependent protein serine/threonine kinase inhibitor activity	molecular_function	8	LOC_Os03g01740	1	430	4	26868	0.0624996
GO:0045339	farnesyl diphosphate catabolic process	biological_process	9	LOC_Os04g01810	1	430	4	26868	0.0624996
GO:0010112	regulation of systemic acquired resistance	biological_process	8	LOC_Os11g44680	1	430	4	26868	0.0624996
GO:1901601	strigolactone biosynthetic process	biological_process	11	LOC_Os03g10620	1	430	4	26868	0.0624996
GO:0006617	SRP-dependent cotranslational protein targeting to membrane, signal sequence recognition	biological_process	8	LOC_Os05g43390	1	430	4	26868	0.0624996
GO:0009955	adaxial/abaxial pattern specification	biological_process	6	LOC_Os03g52320	1	430	4	26868	0.0624996
GO:0052658	inositol-1,4,5-trisphosphate 5-phosphatase activity	molecular_function	10	LOC_Os01g08780	1	430	4	26868	0.0624996
GO:0016231	beta-N-acetylglucosaminidase activity	molecular_function	9	LOC_Os10g39680	1	430	4	26868	0.0624996
GO:0052659	inositol-1,3,4,5-tetrakisphosphate 5-phosphatase activity	molecular_function	10	LOC_Os01g08780	1	430	4	26868	0.0624996
GO:0006040	amino sugar metabolic process	biological_process	6	LOC_Os10g39680	1	430	4	26868	0.0624996
GO:0035252	UDP-xylosyltransferase activity	molecular_function	7	LOC_Os03g19310	1	430	4	26868	0.0624996
GO:0016607	nuclear speck	cellular_component	8	LOC_Os04g49370;LOC_Os01g53730;LOC_Os05g44900	3	430	57	26868	0.0632186
GO:0010154	fruit development	biological_process	6	LOC_Os04g45330;LOC_Os12g24320	2	430	26	26868	0.064533
GO:0034605	cellular response to heat	biological_process	6	LOC_Os01g61080;LOC_Os05g27730	2	430	26	26868	0.064533
GO:0006857	oligopeptide transport	biological_process	9	LOC_Os05g35650;LOC_Os01g65169;LOC_Os08g05910;LOC_Os04g36040	4	430	95	26868	0.0663598
GO:0009738	abscisic acid-activated signaling pathway	biological_process	6	LOC_Os12g36880;LOC_Os02g03410;LOC_Os03g48270;LOC_Os03g17700;LOC_Os01g08780;LOC_Os12g36830	6	430	178	26868	0.0672253
GO:0009873	ethylene-activated signaling pathway	biological_process	7	LOC_Os06g11860;LOC_Os01g14440;LOC_Os10g41330;LOC_Os01g49830;LOC_Os12g03290;LOC_Os01g04800	6	430	178	26868	0.0672253
GO:0009944	polarity specification of adaxial/abaxial axis	biological_process	6	LOC_Os11g40840;LOC_Os04g45330	2	430	27	26868	0.0689794
GO:0004805	trehalose-phosphatase activity	molecular_function	9	LOC_Os08g34580;LOC_Os08g31980	2	430	28	26868	0.0735231
GO:0042335	cuticle development	biological_process	5	LOC_Os09g34930;LOC_Os06g15170	2	430	28	26868	0.0735231
GO:0016491	oxidoreductase activity	molecular_function	4	LOC_Os11g06590;LOC_Os12g12560;LOC_Os01g01660;LOC_Os04g53850;LOC_Os04g53810;LOC_Os11g10990;LOC_Os12g12580;LOC_Os10g31780	8	430	275	26868	0.0759994
GO:0071323	cellular response to chitin	biological_process	8	LOC_Os02g45750	1	430	5	26868	0.0775058
GO:0010266	response to vitamin B1	biological_process	7	LOC_Os01g28500	1	430	5	26868	0.0775058
GO:0016629	12-oxophytodienoate reductase activity	molecular_function	7	LOC_Os06g11240	1	430	5	26868	0.0775058
GO:0012511	monolayer-surrounded lipid storage body	cellular_component	7	LOC_Os12g26290	1	430	5	26868	0.0775058
GO:0030155	regulation of cell adhesion	biological_process	5	LOC_Os11g40840	1	430	5	26868	0.0775058
GO:0009113	purine nucleobase biosynthetic process	biological_process	10	LOC_Os05g35580	1	430	5	26868	0.0775058
GO:0051938	L-glutamate import	biological_process	11	LOC_Os01g11160	1	430	5	26868	0.0775058
GO:0015689	molybdate ion transport	biological_process	9	LOC_Os08g01120	1	430	5	26868	0.0775058
GO:0070301	cellular response to hydrogen peroxide	biological_process	8	LOC_Os01g11860	1	430	5	26868	0.0775058
GO:0004445	inositol-polyphosphate 5-phosphatase activity	molecular_function	10	LOC_Os01g08780	1	430	5	26868	0.0775058
GO:0004616	phosphogluconate dehydrogenase (decarboxylating) activity	molecular_function	7	LOC_Os01g53910	1	430	5	26868	0.0775058
GO:0008312	7S RNA binding	molecular_function	7	LOC_Os05g43390	1	430	5	26868	0.0775058
GO:0034484	raffinose catabolic process	biological_process	8	LOC_Os12g36870	1	430	5	26868	0.0775058
GO:0006777	Mo-molybdopterin cofactor biosynthetic process	biological_process	8	LOC_Os02g35200	1	430	5	26868	0.0775058
GO:0033843	xyloglucan 6-xylosyltransferase activity	molecular_function	8	LOC_Os03g19310	1	430	5	26868	0.0775058
GO:0015098	molybdate ion transmembrane transporter activity	molecular_function	8	LOC_Os08g01120	1	430	5	26868	0.0775058
GO:0005544	calcium-dependent phospholipid binding	molecular_function	6	LOC_Os01g62430;LOC_Os05g30970	2	430	30	26868	0.0828859
GO:0016021	integral component of membrane	cellular_component	5	LOC_Os06g15170;LOC_Os06g04990;LOC_Os02g45750;LOC_Os03g03200;LOC_Os01g53920;LOC_Os01g42410;LOC_Os03g56250;LOC_Os07g17330;LOC_Os01g66760;LOC_Os06g36450;LOC_Os11g37700;LOC_Os09g27950;LOC_Os08g29570;LOC_Os04g44910;LOC_Os05g11010;LOC_Os04g44900;LOC_Os01g42370;LOC_Os09g25760;LOC_Os11g10990;LOC_Os08g05910;LOC_Os04g37670;LOC_Os07g03840;LOC_Os11g04030;LOC_Os03g56160;LOC_Os11g07225;LOC_Os05g40700;LOC_Os01g…	62	430	3260	26868	0.0847853
GO:0046914	transition metal ion binding	molecular_function	7	LOC_Os04g57200;LOC_Os02g37330;LOC_Os04g39350;LOC_Os04g39320	4	430	104	26868	0.0859889
GO:0046916	cellular transition metal ion homeostasis	biological_process	11	LOC_Os04g39350;LOC_Os02g37330;LOC_Os04g57200;LOC_Os04g39320	4	430	104	26868	0.0859889
GO:0009664	plant-type cell wall organization	biological_process	7	LOC_Os04g59150;LOC_Os04g59260;LOC_Os01g57730;LOC_Os08g02110;LOC_Os11g40840	5	430	147	26868	0.0878512
GO:0016757	transferase activity, transferring glycosyl groups	molecular_function	5	LOC_Os02g22160;LOC_Os08g34580;LOC_Os12g36870;LOC_Os08g31980;LOC_Os10g40640;LOC_Os06g27560;LOC_Os03g19310;LOC_Os09g27950;LOC_Os01g72610	9	430	333	26868	0.0887395
GO:0016123	xanthophyll biosynthetic process	biological_process	12	LOC_Os03g03370	1	430	6	26868	0.0922723
GO:0052692	raffinose alpha-galactosidase activity	molecular_function	9	LOC_Os12g36870	1	430	6	26868	0.0922723
GO:0010106	cellular response to iron ion starvation	biological_process	9	LOC_Os06g36450	1	430	6	26868	0.0922723
GO:0090575	RNA polymerase II transcription factor complex	cellular_component	6	LOC_Os01g01870	1	430	6	26868	0.0922723
GO:0019752	carboxylic acid metabolic process	biological_process	7	LOC_Os02g01510	1	430	6	26868	0.0922723
GO:0071446	cellular response to salicylic acid stimulus	biological_process	7	LOC_Os12g26290	1	430	6	26868	0.0922723
GO:0047134	protein-disulfide reductase activity	molecular_function	7	LOC_Os03g29190	1	430	6	26868	0.0922723
GO:0004351	glutamate decarboxylase activity	molecular_function	7	LOC_Os03g13300	1	430	6	26868	0.0922723
GO:0048531	beta-1,3-galactosyltransferase activity	molecular_function	8	LOC_Os09g27950	1	430	6	26868	0.0922723
GO:0016328	lateral plasma membrane	cellular_component	5	LOC_Os10g35460	1	430	6	26868	0.0922723
GO:0019172	glyoxalase III activity	molecular_function	7	LOC_Os01g11860	1	430	6	26868	0.0922723
GO:0000272	polysaccharide catabolic process	biological_process	7	LOC_Os03g22790	1	430	6	26868	0.0922723
GO:0010480	microsporocyte differentiation	biological_process	5	LOC_Os12g43640	1	430	6	26868	0.0922723
GO:0009897	external side of plasma membrane	cellular_component	5	LOC_Os10g35460	1	430	6	26868	0.0922723
GO:0006574	valine catabolic process	biological_process	11	LOC_Os01g53910	1	430	6	26868	0.0922723
GO:0009001	serine O-acetyltransferase activity	molecular_function	9	LOC_Os01g52260	1	430	6	26868	0.0922723
GO:1902183	regulation of shoot apical meristem development	biological_process	7	LOC_Os04g45330	1	430	6	26868	0.0922723
GO:0005992	trehalose biosynthetic process	biological_process	9	LOC_Os08g34580;LOC_Os08g31980	2	430	32	26868	0.0925889
GO:0009617	response to bacterium	biological_process	7	LOC_Os03g17700;LOC_Os03g23010;LOC_Os11g44680	3	430	68	26868	0.0955242
GO:0006633	fatty acid biosynthetic process	biological_process	10	LOC_Os06g15170;LOC_Os11g06590;LOC_Os09g34930;LOC_Os02g11070	4	430	110	26868	0.100467
GO:0019288	isopentenyl diphosphate biosynthetic process, methylerythritol 4-phosphate pathway	biological_process	10	LOC_Os07g09190	1	430	7	26868	0.106803
GO:0080086	stamen filament development	biological_process	5	LOC_Os04g37430	1	430	7	26868	0.106803
GO:0016114	terpenoid biosynthetic process	biological_process	9	LOC_Os07g09190	1	430	7	26868	0.106803
GO:0010103	stomatal complex morphogenesis	biological_process	6	LOC_Os11g40840	1	430	7	26868	0.106803
GO:1902584	positive regulation of response to water deprivation	biological_process	7	LOC_Os11g44680	1	430	7	26868	0.106803
GO:0006826	iron ion transport	biological_process	10	LOC_Os06g36450	1	430	7	26868	0.106803
GO:0006555	methionine metabolic process	biological_process	10	LOC_Os10g28350	1	430	7	26868	0.106803
GO:0009228	thiamine biosynthetic process	biological_process	8	LOC_Os07g09190	1	430	7	26868	0.106803
GO:0043433	negative regulation of DNA-binding transcription factor activity	biological_process	6	LOC_Os05g44270	1	430	7	26868	0.106803
GO:0006536	glutamate metabolic process	biological_process	11	LOC_Os03g13300	1	430	7	26868	0.106803
GO:0051289	protein homotetramerization	biological_process	9	LOC_Os10g37340	1	430	7	26868	0.106803
GO:0008235	metalloexopeptidase activity	molecular_function	8	LOC_Os12g24650	1	430	7	26868	0.106803
GO:0071219	cellular response to molecule of bacterial origin	biological_process	7	LOC_Os11g44680	1	430	7	26868	0.106803
GO:0030001	metal ion transport	biological_process	8	LOC_Os04g57200;LOC_Os02g37330;LOC_Os04g39350;LOC_Os04g39320	4	430	113	26868	0.108102
GO:0042744	hydrogen peroxide catabolic process	biological_process	8	LOC_Os06g35520;LOC_Os03g13210;LOC_Os10g02070	3	430	72	26868	0.108649
GO:0048046	apoplast	cellular_component	4	LOC_Os02g52010;LOC_Os01g28500;LOC_Os06g35520;LOC_Os04g55159;LOC_Os08g37840;LOC_Os04g15920;LOC_Os04g58710	7	430	251	26868	0.109789
GO:0005509	calcium ion binding	molecular_function	7	LOC_Os04g41540;LOC_Os05g13580;LOC_Os01g62430;LOC_Os12g04360;LOC_Os06g46950;LOC_Os07g43800	6	430	204	26868	0.110489
GO:0009651	response to salt stress	biological_process	6	LOC_Os10g35460;LOC_Os11g45740;LOC_Os12g03290;LOC_Os03g13840;LOC_Os02g01510;LOC_Os12g24320;LOC_Os05g27730;LOC_Os06g11860;LOC_Os01g61080	9	430	351	26868	0.11275
GO:0048653	anther development	biological_process	5	LOC_Os04g37430;LOC_Os12g43640	2	430	36	26868	0.112893
GO:0009753	response to jasmonic acid	biological_process	6	LOC_Os11g45740;LOC_Os04g37430;LOC_Os03g60080;LOC_Os05g25770	4	430	116	26868	0.115989
GO:0009416	response to light stimulus	biological_process	6	LOC_Os02g11070;LOC_Os04g40100;LOC_Os06g11860;LOC_Os03g60080;LOC_Os06g15170;LOC_Os01g52240	6	430	208	26868	0.11817
GO:0005634	nucleus	cellular_component	6	LOC_Os05g35260;LOC_Os01g15640;LOC_Os05g03760;LOC_Os11g34080;LOC_Os02g09830;LOC_Os05g51520;LOC_Os02g46620;LOC_Os09g31200;LOC_Os11g25780;LOC_Os02g48320;LOC_Os01g04280;LOC_Os03g08320;LOC_Os09g21740;LOC_Os01g04800;LOC_Os12g36830;LOC_Os04g41960;LOC_Os02g08440;LOC_Os09g28354;LOC_Os09g04160;LOC_Os04g21950;LOC_Os01g43480;LOC_Os01g66760;LOC_Os01g49830;LOC_Os08g33160;LOC_Os02g06640;LOC_Os04g54300;LOC_Os01g…	121	430	6869	26868	0.120085
GO:0034755	iron ion transmembrane transport	biological_process	11	LOC_Os06g36450	1	430	8	26868	0.121102
GO:0045723	positive regulation of fatty acid biosynthetic process	biological_process	9	LOC_Os12g03290	1	430	8	26868	0.121102
GO:0070696	transmembrane receptor protein serine/threonine kinase binding	molecular_function	7	LOC_Os04g34140	1	430	8	26868	0.121102
GO:0090351	seedling development	biological_process	5	LOC_Os01g08780	1	430	8	26868	0.121102
GO:1901959	positive regulation of cutin biosynthetic process	biological_process	9	LOC_Os12g03290	1	430	8	26868	0.121102
GO:0006614	SRP-dependent cotranslational protein targeting to membrane	biological_process	14	LOC_Os05g43390	1	430	8	26868	0.121102
GO:0008361	regulation of cell size	biological_process	6	LOC_Os03g60080	1	430	8	26868	0.121102
GO:0045549	9-cis-epoxycarotenoid dioxygenase activity	molecular_function	8	LOC_Os08g28240	1	430	8	26868	0.121102
GO:0052689	carboxylic ester hydrolase activity	molecular_function	6	LOC_Os09g28230;LOC_Os07g41590;LOC_Os08g43430;LOC_Os03g15270;LOC_Os06g11090;LOC_Os01g66840	6	430	210	26868	0.122109
GO:0042938	dipeptide transport	biological_process	10	LOC_Os05g35650;LOC_Os01g65169	2	430	38	26868	0.123437
GO:0009741	response to brassinosteroid	biological_process	6	LOC_Os03g03280;LOC_Os02g52010	2	430	39	26868	0.128795
GO:0046855	inositol phosphate dephosphorylation	biological_process	9	LOC_Os01g08780	1	430	9	26868	0.135172
GO:0045165	cell fate commitment	biological_process	5	LOC_Os04g45330	1	430	9	26868	0.135172
GO:0004066	asparagine synthase (glutamine-hydrolyzing) activity	molecular_function	7	LOC_Os04g58280	1	430	9	26868	0.135172
GO:0009641	shade avoidance	biological_process	8	LOC_Os10g41230	1	430	9	26868	0.135172
GO:0010158	abaxial cell fate specification	biological_process	6	LOC_Os04g45330	1	430	9	26868	0.135172
GO:0006529	asparagine biosynthetic process	biological_process	12	LOC_Os04g58280	1	430	9	26868	0.135172
GO:0019243	methylglyoxal catabolic process to D-lactate via S-lactoyl-glutathione	biological_process	11	LOC_Os01g11860	1	430	9	26868	0.135172
GO:0005773	vacuole	cellular_component	6	LOC_Os01g11230;LOC_Os09g39960;LOC_Os08g01120;LOC_Os05g28740;LOC_Os12g24650;LOC_Os02g57720;LOC_Os01g19820;LOC_Os03g19270;LOC_Os02g06640;LOC_Os02g51710	10	430	418	26868	0.136087
GO:0007275	multicellular organism development	biological_process	4	LOC_Os06g51070;LOC_Os12g03290;LOC_Os01g60020;LOC_Os03g04070;LOC_Os12g03110;LOC_Os01g15640;LOC_Os03g60080	7	430	267	26868	0.138349
GO:0046777	protein autophosphorylation	biological_process	10	LOC_Os03g03280;LOC_Os01g66860;LOC_Os02g03410;LOC_Os03g48270	4	430	127	26868	0.146925
GO:0000304	response to singlet oxygen	biological_process	7	LOC_Os03g58790	1	430	10	26868	0.149017
GO:0009938	negative regulation of gibberellic acid mediated signaling pathway	biological_process	9	LOC_Os02g48320	1	430	10	26868	0.149017
GO:0000381	regulation of alternative mRNA splicing, via spliceosome	biological_process	10	LOC_Os02g14780	1	430	10	26868	0.149017
GO:0019139	cytokinin dehydrogenase activity	molecular_function	6	LOC_Os01g56810	1	430	10	26868	0.149017
GO:0010598	NAD(P)H dehydrogenase complex (plastoquinone)	cellular_component	5	LOC_Os11g10990	1	430	10	26868	0.149017
GO:0045595	regulation of cell differentiation	biological_process	6	LOC_Os06g11860	1	430	10	26868	0.149017
GO:0016420	malonyltransferase activity	molecular_function	7	LOC_Os02g28340	1	430	10	26868	0.149017
GO:0046564	oxalate decarboxylase activity	molecular_function	7	LOC_Os03g58980;LOC_Os08g13440	2	430	43	26868	0.150731
GO:0009931	calcium-dependent protein serine/threonine kinase activity	molecular_function	9	LOC_Os03g48270;LOC_Os02g03410	2	430	43	26868	0.150731
GO:0033609	oxalate metabolic process	biological_process	9	LOC_Os03g58980;LOC_Os08g13440	2	430	43	26868	0.150731
GO:0004683	calmodulin-dependent protein kinase activity	molecular_function	9	LOC_Os03g48270;LOC_Os02g03410	2	430	44	26868	0.156326
GO:0003824	catalytic activity	molecular_function	3	LOC_Os02g35200;LOC_Os06g44170;LOC_Os06g44180;LOC_Os08g43180;LOC_Os10g37340;LOC_Os01g53910	6	430	227	26868	0.15808
GO:0005786	signal recognition particle, endoplasmic reticulum targeting	cellular_component	7	LOC_Os05g43390	1	430	11	26868	0.162642
GO:0034485	phosphatidylinositol-3,4,5-trisphosphate 5-phosphatase activity	molecular_function	10	LOC_Os01g08780	1	430	11	26868	0.162642
GO:1903401	L-lysine transmembrane transport	biological_process	8	LOC_Os01g11160	1	430	11	26868	0.162642
GO:0015189	L-lysine transmembrane transporter activity	molecular_function	7	LOC_Os01g11160	1	430	11	26868	0.162642
GO:0051510	regulation of unidimensional cell growth	biological_process	7	LOC_Os03g03280	1	430	11	26868	0.162642
GO:0009688	abscisic acid biosynthetic process	biological_process	11	LOC_Os08g28240	1	430	11	26868	0.162642
GO:0010214	seed coat development	biological_process	5	LOC_Os04g58710	1	430	11	26868	0.162642
GO:0002229	defense response to oomycetes	biological_process	8	LOC_Os11g44680	1	430	11	26868	0.162642
GO:0005313	L-glutamate transmembrane transporter activity	molecular_function	8	LOC_Os01g11160	1	430	11	26868	0.162642
GO:0080167	response to karrikin	biological_process	5	LOC_Os04g43800;LOC_Os12g36870;LOC_Os05g35290	3	430	88	26868	0.167116
GO:0006032	chitin catabolic process	biological_process	8	LOC_Os10g28080;LOC_Os06g25010	2	430	46	26868	0.167629
GO:0003713	transcription coactivator activity	molecular_function	5	LOC_Os01g11860;LOC_Os03g52320	2	430	46	26868	0.167629
GO:0030246	carbohydrate binding	molecular_function	4	LOC_Os04g44900;LOC_Os07g03840;LOC_Os03g56160;LOC_Os02g48210;LOC_Os04g44910	5	430	182	26868	0.168245
GO:0006631	fatty acid metabolic process	biological_process	9	LOC_Os03g03790;LOC_Os03g01140	2	430	47	26868	0.173332
GO:0009862	systemic acquired resistance, salicylic acid mediated signaling pathway	biological_process	6	LOC_Os05g25770	1	430	12	26868	0.176048
GO:0009635	response to herbicide	biological_process	5	LOC_Os08g05910	1	430	12	26868	0.176048
GO:0050829	defense response to Gram-negative bacterium	biological_process	9	LOC_Os09g25760	1	430	12	26868	0.176048
GO:0006189	'de novo' IMP biosynthetic process	biological_process	13	LOC_Os05g35580	1	430	12	26868	0.176048
GO:0016165	linoleate 13S-lipoxygenase activity	molecular_function	7	LOC_Os04g37430	1	430	12	26868	0.176048
GO:0016567	protein ubiquitination	biological_process	11	LOC_Os11g34080;LOC_Os04g40100;LOC_Os04g40630;LOC_Os06g34450;LOC_Os09g39650;LOC_Os09g31200;LOC_Os04g34140;LOC_Os05g36360;LOC_Os02g34410;LOC_Os10g40490	10	430	446	26868	0.1805
GO:0005524	ATP binding	molecular_function	5	LOC_Os03g56250;LOC_Os02g48210;LOC_Os06g50100;LOC_Os10g33040;LOC_Os03g17700;LOC_Os04g58710;LOC_Os11g11960;LOC_Os04g43440;LOC_Os05g28740;LOC_Os02g45750;LOC_Os04g44900;LOC_Os03g58790;LOC_Os11g06590;LOC_Os01g66860;LOC_Os01g04580;LOC_Os04g44910;LOC_Os01g19820;LOC_Os11g40840;LOC_Os12g24320;LOC_Os03g56160;LOC_Os11g12320;LOC_Os12g17430;LOC_Os11g07225;LOC_Os09g39650;LOC_Os01g66760;LOC_Os03g19270;LOC_Os02g…	34	430	1807	26868	0.185292
GO:0048229	gametophyte development	biological_process	5	LOC_Os12g43640	1	430	13	26868	0.189241
GO:0004124	cysteine synthase activity	molecular_function	6	LOC_Os06g36880	1	430	13	26868	0.189241
GO:0016208	AMP binding	molecular_function	5	LOC_Os04g58710	1	430	13	26868	0.189241
GO:0002237	response to molecule of bacterial origin	biological_process	6	LOC_Os11g44680	1	430	13	26868	0.189241
GO:0009933	meristem structural organization	biological_process	5	LOC_Os04g45330	1	430	13	26868	0.189241
GO:0030145	manganese ion binding	molecular_function	8	LOC_Os12g24650	1	430	13	26868	0.189241
GO:0048577	negative regulation of short-day photoperiodism, flowering	biological_process	9	LOC_Os06g34450	1	430	13	26868	0.189241
GO:0009864	induced systemic resistance, jasmonic acid mediated signaling pathway	biological_process	6	LOC_Os05g25770	1	430	13	26868	0.189241
GO:0001558	regulation of cell growth	biological_process	6	LOC_Os11g40840	1	430	13	26868	0.189241
GO:0009116	nucleoside metabolic process	biological_process	8	LOC_Os05g35580	1	430	13	26868	0.189241
GO:0007169	transmembrane receptor protein tyrosine kinase signaling pathway	biological_process	7	LOC_Os03g56250;LOC_Os02g14480;LOC_Os08g24310;LOC_Os01g66760;LOC_Os12g43640;LOC_Os11g07225	6	430	243	26868	0.195623
GO:0005506	iron ion binding	molecular_function	8	LOC_Os01g72260;LOC_Os01g63930;LOC_Os05g37250	3	430	96	26868	0.199164
GO:0010093	specification of floral organ identity	biological_process	5	LOC_Os04g45330	1	430	14	26868	0.202223
GO:0008519	ammonium transmembrane transporter activity	molecular_function	7	LOC_Os04g43070	1	430	14	26868	0.202223
GO:0040007	growth	biological_process	3	LOC_Os04g37430	1	430	14	26868	0.202223
GO:0043067	regulation of programmed cell death	biological_process	7	LOC_Os11g34080	1	430	14	26868	0.202223
GO:0010215	cellulose microfibril organization	biological_process	7	LOC_Os10g35460	1	430	14	26868	0.202223
GO:0047714	galactolipase activity	molecular_function	7	LOC_Os02g43700	1	430	14	26868	0.202223
GO:0016131	brassinosteroid metabolic process	biological_process	8	LOC_Os06g39880	1	430	14	26868	0.202223
GO:0072488	ammonium transmembrane transport	biological_process	9	LOC_Os04g43070	1	430	14	26868	0.202223
GO:0006863	purine nucleobase transport	biological_process	8	LOC_Os04g49757	1	430	14	26868	0.202223
GO:0009725	response to hormone	biological_process	5	LOC_Os10g41230	1	430	14	26868	0.202223
GO:0015695	organic cation transport	biological_process	8	LOC_Os04g43070	1	430	14	26868	0.202223
GO:0005345	purine nucleobase transmembrane transporter activity	molecular_function	6	LOC_Os04g49757	1	430	14	26868	0.202223
GO:0048437	floral organ development	biological_process	5	LOC_Os12g43640	1	430	14	26868	0.202223
GO:0019740	nitrogen utilization	biological_process	3	LOC_Os04g43070	1	430	14	26868	0.202223
GO:0046685	response to arsenic-containing substance	biological_process	5	LOC_Os10g31780	1	430	14	26868	0.202223
GO:0045454	cell redox homeostasis	biological_process	5	LOC_Os07g06600;LOC_Os03g29190;LOC_Os01g47760	3	430	97	26868	0.203271
GO:0080092	regulation of pollen tube growth	biological_process	9	LOC_Os03g29190	1	430	15	26868	0.214997
GO:0045330	aspartyl esterase activity	molecular_function	6	LOC_Os09g39760	1	430	15	26868	0.214997
GO:0006790	sulfur compound metabolic process	biological_process	5	LOC_Os02g35200	1	430	15	26868	0.214997
GO:0004707	MAP kinase activity	molecular_function	9	LOC_Os03g17700	1	430	15	26868	0.214997
GO:0003677	DNA binding	molecular_function	6	LOC_Os12g03110;LOC_Os03g04070;LOC_Os02g09830;LOC_Os05g45020;LOC_Os10g41230;LOC_Os05g03760;LOC_Os09g16510;LOC_Os09g31200;LOC_Os11g45740;LOC_Os07g38170;LOC_Os01g49830;LOC_Os10g41330;LOC_Os06g45890;LOC_Os04g45330;LOC_Os02g49440;LOC_Os02g40530;LOC_Os06g51070;LOC_Os01g60020;LOC_Os01g15640;LOC_Os01g60640;LOC_Os03g60080;LOC_Os06g11860;LOC_Os01g04800;LOC_Os02g48320;LOC_Os12g03290;LOC_Os02g47560;LOC_Os01g…	27	430	1432	26868	0.215321
GO:0051302	regulation of cell division	biological_process	6	LOC_Os11g40840	1	430	16	26868	0.227567
GO:0004177	aminopeptidase activity	molecular_function	8	LOC_Os12g24650	1	430	16	26868	0.227567
GO:0015293	symporter activity	molecular_function	7	LOC_Os08g05910	1	430	16	26868	0.227567
GO:0009514	glyoxysome	cellular_component	8	LOC_Os03g14000	1	430	16	26868	0.227567
GO:0010187	negative regulation of seed germination	biological_process	10	LOC_Os12g03290	1	430	17	26868	0.239937
GO:0010494	cytoplasmic stress granule	cellular_component	8	LOC_Os05g45020	1	430	17	26868	0.239937
GO:0006813	potassium ion transport	biological_process	9	LOC_Os04g32920	1	430	17	26868	0.239937
GO:0005545	1-phosphatidylinositol binding	molecular_function	7	LOC_Os02g55970	1	430	17	26868	0.239937
GO:0051536	iron-sulfur cluster binding	molecular_function	5	LOC_Os05g35580	1	430	17	26868	0.239937
GO:0048268	clathrin coat assembly	biological_process	8	LOC_Os02g55970	1	430	17	26868	0.239937
GO:0031409	pigment binding	molecular_function	4	LOC_Os01g52240	1	430	17	26868	0.239937
GO:0015116	sulfate transmembrane transporter activity	molecular_function	8	LOC_Os08g01120	1	430	17	26868	0.239937
GO:0042277	peptide binding	molecular_function	5	LOC_Os11g40840	1	430	17	26868	0.239937
GO:2000024	regulation of leaf development	biological_process	8	LOC_Os04g45330	1	430	17	26868	0.239937
GO:0009958	positive gravitropism	biological_process	7	LOC_Os04g40100	1	430	17	26868	0.239937
GO:0098542	defense response to other organism	biological_process	6	LOC_Os03g63310	1	430	18	26868	0.252109
GO:0001944	vasculature development	biological_process	6	LOC_Os11g40840	1	430	18	26868	0.252109
GO:0010030	positive regulation of seed germination	biological_process	10	LOC_Os04g58710	1	430	18	26868	0.252109
GO:0071577	zinc ion transmembrane transport	biological_process	11	LOC_Os03g29850	1	430	18	26868	0.252109
GO:0000062	fatty-acyl-CoA binding	molecular_function	9	LOC_Os03g14000	1	430	18	26868	0.252109
GO:0009768	photosynthesis, light harvesting in photosystem I	biological_process	7	LOC_Os01g52240	1	430	18	26868	0.252109
GO:0046872	metal ion binding	molecular_function	6	LOC_Os10g40640;LOC_Os08g28240;LOC_Os12g26290;LOC_Os10g02070;LOC_Os02g49440;LOC_Os04g37430;LOC_Os04g45330;LOC_Os12g03110;LOC_Os02g47510;LOC_Os05g03760;LOC_Os06g35520;LOC_Os03g13210;LOC_Os07g09190;LOC_Os01g69270;LOC_Os05g35580;LOC_Os05g45020;LOC_Os11g15570;LOC_Os03g10950	18	430	943	26868	0.254658
GO:0010287	plastoglobule	cellular_component	8	LOC_Os01g52240;LOC_Os02g47510	2	430	61	26868	0.255411
GO:0042542	response to hydrogen peroxide	biological_process	7	LOC_Os04g40630;LOC_Os09g16510	2	430	61	26868	0.255411
GO:0009809	lignin biosynthetic process	biological_process	8	LOC_Os09g23560;LOC_Os04g15920;LOC_Os06g35520	3	430	111	26868	0.262461
GO:1900056	negative regulation of leaf senescence	biological_process	10	LOC_Os05g25770	1	430	19	26868	0.264086
GO:0010223	secondary shoot formation	biological_process	6	LOC_Os03g10620	1	430	19	26868	0.264086
GO:0008568	microtubule-severing ATPase activity	molecular_function	11	LOC_Os01g43480	1	430	19	26868	0.264086
GO:0009863	salicylic acid mediated signaling pathway	biological_process	5	LOC_Os01g47760	1	430	19	26868	0.264086
GO:0006357	regulation of transcription by RNA polymerase II	biological_process	9	LOC_Os01g01870;LOC_Os08g09840;LOC_Os01g11860	3	430	112	26868	0.26678
GO:0004364	glutathione transferase activity	molecular_function	6	LOC_Os10g38700;LOC_Os01g27210;LOC_Os09g29200;LOC_Os10g38780	4	430	165	26868	0.271979
GO:0005515	protein binding	molecular_function	4	LOC_Os04g45330;LOC_Os02g48320;LOC_Os05g34270;LOC_Os09g27010;LOC_Os11g14380;LOC_Os03g06390;LOC_Os11g12320;LOC_Os09g16510;LOC_Os06g11860;LOC_Os05g45020;LOC_Os02g18070;LOC_Os05g27730;LOC_Os08g05910;LOC_Os05g35290;LOC_Os03g60080;LOC_Os02g47510;LOC_Os03g04110;LOC_Os03g01740;LOC_Os03g14000;LOC_Os04g43800;LOC_Os06g35520;LOC_Os03g53200;LOC_Os11g40970;LOC_Os10g33040;LOC_Os01g61080;LOC_Os05g25770;LOC_Os10g…	40	430	2259	26868	0.273703
GO:0006749	glutathione metabolic process	biological_process	8	LOC_Os10g38780;LOC_Os09g29200;LOC_Os01g27210;LOC_Os10g38700	4	430	166	26868	0.275522
GO:0042545	cell wall modification	biological_process	7	LOC_Os09g39760	1	430	20	26868	0.275872
GO:0009901	anther dehiscence	biological_process	6	LOC_Os04g37430	1	430	20	26868	0.275872
GO:0016998	cell wall macromolecule catabolic process	biological_process	8	LOC_Os03g04060	1	430	20	26868	0.275872
GO:0016709	oxidoreductase activity, acting on paired donors, with incorporation or reduction of molecular oxygen, NAD(P)H as one donor, and incorporation of one atom of oxygen	molecular_function	6	LOC_Os03g25150;LOC_Os03g63310;LOC_Os01g27890;LOC_Os10g36960;LOC_Os09g36080	5	430	220	26868	0.277381
GO:0051213	dioxygenase activity	molecular_function	5	LOC_Os03g03034;LOC_Os04g49210;LOC_Os10g39140	3	430	116	26868	0.284134
GO:0006855	drug transmembrane transport	biological_process	7	LOC_Os03g08900;LOC_Os04g30490	2	430	66	26868	0.285111
GO:0046856	phosphatidylinositol dephosphorylation	biological_process	10	LOC_Os01g08780	1	430	21	26868	0.28747
GO:0009887	animal organ morphogenesis	biological_process	5	LOC_Os12g03290	1	430	21	26868	0.28747
GO:0009626	plant-type hypersensitive response	biological_process	6	LOC_Os03g17700;LOC_Os11g12320;LOC_Os12g26290	3	430	119	26868	0.297211
GO:0003712	transcription coregulator activity	molecular_function	4	LOC_Os04g40630	1	430	22	26868	0.298882
GO:0009934	regulation of meristem structural organization	biological_process	7	LOC_Os12g43640	1	430	22	26868	0.298882
GO:0048527	lateral root development	biological_process	8	LOC_Os11g29870	1	430	22	26868	0.298882
GO:0010025	wax biosynthetic process	biological_process	7	LOC_Os06g15170	1	430	22	26868	0.298882
GO:0010075	regulation of meristem growth	biological_process	7	LOC_Os12g43640	1	430	22	26868	0.298882
GO:0010167	response to nitrate	biological_process	6	LOC_Os08g05910	1	430	22	26868	0.298882
GO:0051017	actin filament bundle assembly	biological_process	6	LOC_Os06g13030	1	430	22	26868	0.298882
GO:0006887	exocytosis	biological_process	7	LOC_Os12g44250;LOC_Os08g13570	2	430	69	26868	0.302884
GO:0044550	secondary metabolite biosynthetic process	biological_process	5	LOC_Os10g36960;LOC_Os09g36080;LOC_Os03g25150;LOC_Os01g27890;LOC_Os03g63310	5	430	229	26868	0.305205
GO:0010218	response to far red light	biological_process	8	LOC_Os10g41230	1	430	23	26868	0.310112
GO:0030014	CCR4-NOT complex	cellular_component	4	LOC_Os04g58810	1	430	23	26868	0.310112
GO:0010193	response to ozone	biological_process	7	LOC_Os09g16510	1	430	23	26868	0.310112
GO:0043424	protein histidine kinase binding	molecular_function	8	LOC_Os03g60080	1	430	23	26868	0.310112
GO:0090332	stomatal closure	biological_process	5	LOC_Os05g30970	1	430	23	26868	0.310112
GO:0005618	cell wall	cellular_component	5	LOC_Os08g37840;LOC_Os05g35580;LOC_Os01g28500;LOC_Os03g58980;LOC_Os02g52010;LOC_Os11g35450;LOC_Os01g66840;LOC_Os08g13440;LOC_Os10g33140;LOC_Os09g39760;LOC_Os06g35520;LOC_Os11g35410	12	430	632	26868	0.314252
GO:0018105	peptidyl-serine phosphorylation	biological_process	10	LOC_Os02g03410;LOC_Os03g48270	2	430	71	26868	0.314691
GO:0010150	leaf senescence	biological_process	6	LOC_Os07g17330;LOC_Os09g16510	2	430	72	26868	0.320577
GO:0031348	negative regulation of defense response	biological_process	8	LOC_Os05g34270	1	430	24	26868	0.321163
GO:0005983	starch catabolic process	biological_process	10	LOC_Os03g04770	1	430	24	26868	0.321163
GO:0005381	iron ion transmembrane transporter activity	molecular_function	10	LOC_Os06g36450	1	430	24	26868	0.321163
GO:0005215	transporter activity	molecular_function	3	LOC_Os11g04030;LOC_Os01g65169;LOC_Os05g35650;LOC_Os08g05910;LOC_Os04g36040	5	430	236	26868	0.327123
GO:0009532	plastid stroma	cellular_component	7	LOC_Os05g35580	1	430	25	26868	0.332037
GO:0015995	chlorophyll biosynthetic process	biological_process	9	LOC_Os07g09190	1	430	25	26868	0.332037
GO:0008970	phospholipase A1 activity	molecular_function	8	LOC_Os02g43700	1	430	25	26868	0.332037
GO:0010017	red or far-red light signaling pathway	biological_process	5	LOC_Os06g11860	1	430	25	26868	0.332037
GO:0009791	post-embryonic development	biological_process	4	LOC_Os03g03280	1	430	25	26868	0.332037
GO:0009789	positive regulation of abscisic acid-activated signaling pathway	biological_process	9	LOC_Os11g44680	1	430	25	26868	0.332037
GO:0004672	protein kinase activity	molecular_function	7	LOC_Os01g66760;LOC_Os03g03280;LOC_Os02g14480;LOC_Os05g34270;LOC_Os02g45750;LOC_Os03g17700	6	430	295	26868	0.334569
GO:0004439	phosphatidylinositol-4,5-bisphosphate 5-phosphatase activity	molecular_function	10	LOC_Os01g08780	1	430	26	26868	0.342737
GO:0009825	multidimensional cell growth	biological_process	5	LOC_Os10g35460	1	430	26	26868	0.342737
GO:0005905	clathrin-coated pit	cellular_component	4	LOC_Os02g55970	1	430	26	26868	0.342737
GO:0004402	histone acetyltransferase activity	molecular_function	11	LOC_Os04g40630	1	430	26	26868	0.342737
GO:0009860	pollen tube growth	biological_process	8	LOC_Os07g41590;LOC_Os03g29190	2	430	76	26868	0.34399
GO:0015035	protein disulfide oxidoreductase activity	molecular_function	7	LOC_Os01g47760;LOC_Os07g06600	2	430	77	26868	0.349804
GO:0051865	protein autoubiquitination	biological_process	12	LOC_Os09g31200	1	430	27	26868	0.353266
GO:0000122	negative regulation of transcription by RNA polymerase II	biological_process	10	LOC_Os11g29870	1	430	27	26868	0.353266
GO:0031463	Cul3-RING ubiquitin ligase complex	cellular_component	7	LOC_Os11g14140	1	430	27	26868	0.353266
GO:0071004	U2-type prespliceosome	cellular_component	8	LOC_Os02g14780	1	430	27	26868	0.353266
GO:0045892	negative regulation of transcription, DNA-templated	biological_process	9	LOC_Os01g14440;LOC_Os05g25770;LOC_Os01g49830	3	430	133	26868	0.358424
GO:0042349	guiding stereospecific synthesis activity	molecular_function	5	LOC_Os07g42520;LOC_Os12g07580	2	430	79	26868	0.361378
GO:0006970	response to osmotic stress	biological_process	5	LOC_Os01g61080;LOC_Os06g11860;LOC_Os05g27730;LOC_Os03g17700	4	430	190	26868	0.361995
GO:1901430	positive regulation of syringal lignin biosynthetic process	biological_process	9	LOC_Os06g35520	1	430	28	26868	0.363627
GO:0031122	cytoplasmic microtubule organization	biological_process	8	LOC_Os01g43480	1	430	28	26868	0.363627
GO:0006869	lipid transport	biological_process	7	LOC_Os04g55159;LOC_Os03g14000	2	430	80	26868	0.367137
GO:0048481	plant ovule development	biological_process	5	LOC_Os03g17700	1	430	29	26868	0.373822
GO:0015112	nitrate transmembrane transporter activity	molecular_function	8	LOC_Os08g05910	1	430	29	26868	0.373822
GO:0006520	cellular amino acid metabolic process	biological_process	8	LOC_Os10g37340	1	430	29	26868	0.373822
GO:0045944	positive regulation of transcription by RNA polymerase II	biological_process	10	LOC_Os03g27080	1	430	30	26868	0.383854
GO:0010229	inflorescence development	biological_process	6	LOC_Os03g17700	1	430	30	26868	0.383854
GO:0048038	quinone binding	molecular_function	5	LOC_Os11g10990	1	430	30	26868	0.383854
GO:0022857	transmembrane transporter activity	molecular_function	4	LOC_Os02g47500;LOC_Os04g34490	2	430	83	26868	0.384287
GO:0008219	cell death	biological_process	4	LOC_Os12g26290	1	430	31	26868	0.393726
GO:0000175	3'-5'-exoribonuclease activity	molecular_function	9	LOC_Os04g58810	1	430	31	26868	0.393726
GO:0000288	nuclear-transcribed mRNA catabolic process, deadenylation-dependent decay	biological_process	12	LOC_Os04g58810	1	430	31	26868	0.393726
GO:0000977	RNA polymerase II regulatory region sequence-specific DNA binding	molecular_function	9	LOC_Os08g09840;LOC_Os01g01870	2	430	85	26868	0.395609
GO:0042803	protein homodimerization activity	molecular_function	6	LOC_Os02g45750;LOC_Os04g58280;LOC_Os02g09830	3	430	143	26868	0.401745
GO:0048573	photoperiodism, flowering	biological_process	8	LOC_Os01g04800	1	430	32	26868	0.40344
GO:0048767	root hair elongation	biological_process	6	LOC_Os03g19310	1	430	32	26868	0.40344
GO:0009969	xyloglucan biosynthetic process	biological_process	10	LOC_Os03g19310	1	430	32	26868	0.40344
GO:0016168	chlorophyll binding	molecular_function	6	LOC_Os01g52240	1	430	32	26868	0.40344
GO:0005686	U2 snRNP	cellular_component	8	LOC_Os02g14780	1	430	32	26868	0.40344
GO:0010431	seed maturation	biological_process	5	LOC_Os12g24320	1	430	32	26868	0.40344
GO:0003924	GTPase activity	molecular_function	9	LOC_Os05g43390;LOC_Os09g39960;LOC_Os01g47730	3	430	144	26868	0.406036
GO:0000271	polysaccharide biosynthetic process	biological_process	7	LOC_Os03g19310	1	430	33	26868	0.412999
GO:0016036	cellular response to phosphate starvation	biological_process	9	LOC_Os01g14440	1	430	33	26868	0.412999
GO:0005385	zinc ion transmembrane transporter activity	molecular_function	10	LOC_Os03g29850	1	430	33	26868	0.412999
GO:0016020	membrane	cellular_component	3	LOC_Os04g32920;LOC_Os02g44870;LOC_Os09g36080;LOC_Os04g55159;LOC_Os05g35650;LOC_Os09g25760;LOC_Os05g51520;LOC_Os03g63310;LOC_Os03g04020;LOC_Os10g36960;LOC_Os01g40070;LOC_Os05g44770;LOC_Os04g36040;LOC_Os03g29850;LOC_Os03g37840;LOC_Os04g49757;LOC_Os10g33040;LOC_Os01g65169;LOC_Os01g27890;LOC_Os10g39640;LOC_Os09g27580;LOC_Os03g25150	22	430	1294	26868	0.416241
GO:0031624	ubiquitin conjugating enzyme binding	molecular_function	7	LOC_Os04g50760	1	430	34	26868	0.422405
GO:0008283	cell population proliferation	biological_process	3	LOC_Os03g52320	1	430	35	26868	0.431661
GO:0030136	clathrin-coated vesicle	cellular_component	8	LOC_Os02g55970	1	430	35	26868	0.431661
GO:0009624	response to nematode	biological_process	7	LOC_Os04g36040	1	430	36	26868	0.440769
GO:0032436	positive regulation of proteasomal ubiquitin-dependent protein catabolic process	biological_process	12	LOC_Os04g50760	1	430	36	26868	0.440769
GO:0009631	cold acclimation	biological_process	6	LOC_Os02g44870	1	430	36	26868	0.440769
GO:0008375	acetylglucosaminyltransferase activity	molecular_function	7	LOC_Os02g22160	1	430	36	26868	0.440769
GO:0010411	xyloglucan metabolic process	biological_process	9	LOC_Os03g19310	1	430	36	26868	0.440769
GO:0030276	clathrin binding	molecular_function	5	LOC_Os02g55970	1	430	37	26868	0.449731
GO:0016758	transferase activity, transferring hexosyl groups	molecular_function	6	LOC_Os10g40640	1	430	37	26868	0.449731
GO:0005525	GTP binding	molecular_function	8	LOC_Os05g43390;LOC_Os09g39960;LOC_Os01g47730	3	430	155	26868	0.452559
GO:0005778	peroxisomal membrane	cellular_component	8	LOC_Os03g14000	1	430	38	26868	0.458549
GO:0009788	negative regulation of abscisic acid-activated signaling pathway	biological_process	9	LOC_Os01g60020	1	430	39	26868	0.467227
GO:0009640	photomorphogenesis	biological_process	8	LOC_Os04g45690	1	430	39	26868	0.467227
GO:0016051	carbohydrate biosynthetic process	biological_process	6	LOC_Os10g40640	1	430	39	26868	0.467227
GO:0009744	response to sucrose	biological_process	8	LOC_Os03g60080	1	430	40	26868	0.475766
GO:0031225	anchored component of membrane	cellular_component	5	LOC_Os10g35460;LOC_Os03g14050	2	430	100	26868	0.477123
GO:0045490	pectin catabolic process	biological_process	8	LOC_Os09g39760	1	430	41	26868	0.484169
GO:0009736	cytokinin-activated signaling pathway	biological_process	6	LOC_Os06g11860	1	430	41	26868	0.484169
GO:0040008	regulation of growth	biological_process	5	LOC_Os12g03290	1	430	41	26868	0.484169
GO:0055085	transmembrane transport	biological_process	6	LOC_Os11g04030;LOC_Os03g58580;LOC_Os01g50100	3	430	164	26868	0.489476
GO:0019843	rRNA binding	molecular_function	7	LOC_Os11g34940	1	430	42	26868	0.492437
GO:0001046	core promoter sequence-specific DNA binding	molecular_function	9	LOC_Os11g29870	1	430	42	26868	0.492437
GO:0090406	pollen tube	cellular_component	6	LOC_Os10g33040	1	430	42	26868	0.492437
GO:0009535	chloroplast thylakoid membrane	cellular_component	8	LOC_Os04g55159;LOC_Os11g10990;LOC_Os08g28240;LOC_Os01g52240;LOC_Os02g51710	5	430	291	26868	0.499096
GO:0042128	nitrate assimilation	biological_process	8	LOC_Os08g05910	1	430	43	26868	0.500572
GO:0009055	electron transfer activity	molecular_function	5	LOC_Os01g47760;LOC_Os07g06600	2	430	107	26868	0.512819
GO:0035556	intracellular signal transduction	biological_process	5	LOC_Os02g03410;LOC_Os03g03510;LOC_Os03g48270	3	430	170	26868	0.513401
GO:0006913	nucleocytoplasmic transport	biological_process	8	LOC_Os01g47730	1	430	45	26868	0.516456
GO:0016597	amino acid binding	molecular_function	7	LOC_Os03g14370	1	430	45	26868	0.516456
GO:0015297	antiporter activity	molecular_function	7	LOC_Os01g11160	1	430	45	26868	0.516456
GO:0005829	cytosol	cellular_component	6	LOC_Os09g37540;LOC_Os01g11860;LOC_Os08g37840;LOC_Os12g24650;LOC_Os03g01880;LOC_Os02g08270;LOC_Os05g43390;LOC_Os04g41960;LOC_Os03g13300;LOC_Os03g64070;LOC_Os02g01510;LOC_Os08g13570;LOC_Os01g52260;LOC_Os03g29190;LOC_Os02g44870;LOC_Os02g51710;LOC_Os02g52010;LOC_Os06g35520;LOC_Os03g04770;LOC_Os02g35200;LOC_Os04g58710;LOC_Os04g58280;LOC_Os10g37340;LOC_Os08g43190;LOC_Os01g53910;LOC_Os05g35580;LOC_Os05g…	29	430	1807	26868	0.521656
GO:0004842	ubiquitin-protein transferase activity	molecular_function	6	LOC_Os11g14140;LOC_Os11g34080;LOC_Os06g34450;LOC_Os09g39650;LOC_Os11g45990;LOC_Os04g34140;LOC_Os05g36360;LOC_Os10g40490;LOC_Os02g34410;LOC_Os09g31200	10	430	614	26868	0.522242
GO:0009553	embryo sac development	biological_process	6	LOC_Os04g40630	1	430	46	26868	0.524208
GO:0000145	exocyst	cellular_component	7	LOC_Os08g13570	1	430	47	26868	0.531835
GO:0001666	response to hypoxia	biological_process	5	LOC_Os03g14000	1	430	47	26868	0.531835
GO:0043531	ADP binding	molecular_function	9	LOC_Os11g11960;LOC_Os02g18070;LOC_Os11g12320;LOC_Os12g17430;LOC_Os04g43440	5	430	303	26868	0.534769
GO:0009734	auxin-activated signaling pathway	biological_process	6	LOC_Os08g05910;LOC_Os02g35200	2	430	113	26868	0.542112
GO:0004712	protein serine/threonine/tyrosine kinase activity	molecular_function	8	LOC_Os01g66860	1	430	49	26868	0.546727
GO:0051287	NAD binding	molecular_function	6	LOC_Os01g53910	1	430	49	26868	0.546727
GO:0000151	ubiquitin ligase complex	cellular_component	5	LOC_Os04g50760	1	430	49	26868	0.546727
GO:0006464	cellular protein modification process	biological_process	8	LOC_Os02g06640	1	430	49	26868	0.546727
GO:0009507	chloroplast	cellular_component	7	LOC_Os06g50230;LOC_Os11g34940;LOC_Os04g55159;LOC_Os04g58710;LOC_Os01g72260;LOC_Os04g53850;LOC_Os02g43700;LOC_Os11g10990;LOC_Os11g06590;LOC_Os05g35260;LOC_Os01g29330;LOC_Os04g53810;LOC_Os07g09190;LOC_Os01g61680;LOC_Os08g37840;LOC_Os01g40070;LOC_Os02g47510;LOC_Os01g48610;LOC_Os03g58300;LOC_Os09g16510;LOC_Os02g51710;LOC_Os03g04770;LOC_Os08g28240;LOC_Os04g49757;LOC_Os11g44940;LOC_Os01g11230;LOC_Os04g…	38	430	2398	26868	0.550702
GO:0006906	vesicle fusion	biological_process	7	LOC_Os12g44250	1	430	50	26868	0.553994
GO:0006904	vesicle docking involved in exocytosis	biological_process	7	LOC_Os08g13570	1	430	50	26868	0.553994
GO:0009058	biosynthetic process	biological_process	4	LOC_Os10g40640	1	430	50	26868	0.553994
GO:0010268	brassinosteroid homeostasis	biological_process	8	LOC_Os06g39880	1	430	50	26868	0.553994
GO:0009742	brassinosteroid mediated signaling pathway	biological_process	7	LOC_Os03g03280	1	430	51	26868	0.561145
GO:0009845	seed germination	biological_process	4	LOC_Os01g08780	1	430	51	26868	0.561145
GO:0004806	triglyceride lipase activity	molecular_function	7	LOC_Os02g43700	1	430	52	26868	0.568182
GO:0016705	oxidoreductase activity, acting on paired donors, with incorporation or reduction of molecular oxygen	molecular_function	5	LOC_Os01g72260	1	430	52	26868	0.568182
GO:0016125	sterol metabolic process	biological_process	7	LOC_Os03g55800	1	430	52	26868	0.568182
GO:0032259	methylation	biological_process	4	LOC_Os06g20960;LOC_Os01g51870;LOC_Os02g48770	3	430	185	26868	0.570471
GO:0008289	lipid binding	molecular_function	4	LOC_Os04g55159;LOC_Os03g14000	2	430	120	26868	0.574713
GO:0045087	innate immune response	biological_process	5	LOC_Os02g45750	1	430	53	26868	0.575107
GO:0000209	protein polyubiquitination	biological_process	12	LOC_Os01g16950;LOC_Os04g50760	2	430	121	26868	0.57923
GO:0009735	response to cytokinin	biological_process	6	LOC_Os04g58710;LOC_Os04g15920	2	430	121	26868	0.57923
GO:0004497	monooxygenase activity	molecular_function	5	LOC_Os03g55800;LOC_Os06g39880;LOC_Os01g72260	3	430	188	26868	0.581379
GO:0004721	phosphoprotein phosphatase activity	molecular_function	8	LOC_Os11g15570	1	430	55	26868	0.588625
GO:0006810	transport	biological_process	5	LOC_Os04g34490;LOC_Os02g47500;LOC_Os11g10990	3	430	191	26868	0.59211
GO:0005856	cytoskeleton	cellular_component	6	LOC_Os06g13030	1	430	57	26868	0.601714
GO:0005774	vacuolar membrane	cellular_component	7	LOC_Os05g51520;LOC_Os01g51870;LOC_Os09g39960;LOC_Os01g11230;LOC_Os01g40070;LOC_Os02g51710	6	430	395	26868	0.607596
GO:0007166	cell surface receptor signaling pathway	biological_process	5	LOC_Os04g58890;LOC_Os11g44560;LOC_Os04g30250	3	430	196	26868	0.609597
GO:0005840	ribosome	cellular_component	6	LOC_Os11g34940	1	430	59	26868	0.614387
GO:0005484	SNAP receptor activity	molecular_function	5	LOC_Os12g44250	1	430	59	26868	0.614387
GO:0071944	cell periphery	cellular_component	4	LOC_Os04g40100	1	430	59	26868	0.614387
GO:0007264	small GTPase mediated signal transduction	biological_process	6	LOC_Os01g47730	1	430	59	26868	0.614387
GO:0010089	xylem development	biological_process	7	LOC_Os06g35520	1	430	59	26868	0.614387
GO:0016787	hydrolase activity	molecular_function	4	LOC_Os02g47560;LOC_Os03g10620;LOC_Os03g49440;LOC_Os01g08780;LOC_Os03g03200;LOC_Os01g66840	6	430	402	26868	0.624543
GO:0000981	DNA-binding transcription factor activity, RNA polymerase II-specific	molecular_function	5	LOC_Os12g03290	1	430	61	26868	0.626658
GO:0006486	protein glycosylation	biological_process	9	LOC_Os09g27950	1	430	61	26868	0.626658
GO:0000149	SNARE binding	molecular_function	5	LOC_Os12g44250	1	430	61	26868	0.626658
GO:0006629	lipid metabolic process	biological_process	5	LOC_Os12g26290;LOC_Os02g43700	2	430	134	26868	0.634742
GO:0004190	aspartic-type endopeptidase activity	molecular_function	8	LOC_Os06g03120;LOC_Os05g33400;LOC_Os01g62630;LOC_Os11g08100	4	430	274	26868	0.641152
GO:0031201	SNARE complex	cellular_component	6	LOC_Os12g44250	1	430	64	26868	0.644338
GO:0000932	P-body	cellular_component	8	LOC_Os05g45020	1	430	64	26868	0.644338
GO:0009826	unidimensional cell growth	biological_process	7	LOC_Os03g03280;LOC_Os06g15170	2	430	137	26868	0.64671
GO:0016298	lipase activity	molecular_function	6	LOC_Os01g54470	1	430	65	26868	0.650043
GO:0030599	pectinesterase activity	molecular_function	7	LOC_Os09g39760	1	430	66	26868	0.655658
GO:0006457	protein folding	biological_process	4	LOC_Os03g18870;LOC_Os06g50230;LOC_Os11g10990	3	430	210	26868	0.655846
GO:0005615	extracellular space	cellular_component	4	LOC_Os08g37840;LOC_Os02g52010	2	430	140	26868	0.658366
GO:0004722	protein serine/threonine phosphatase activity	molecular_function	9	LOC_Os11g15570;LOC_Os03g10950	2	430	142	26868	0.665964
GO:0009909	regulation of flower development	biological_process	8	LOC_Os04g45330	1	430	68	26868	0.666618
GO:0015254	glycerol channel activity	molecular_function	7	LOC_Os02g57720	1	430	69	26868	0.671967
GO:0009992	cellular water homeostasis	biological_process	8	LOC_Os02g57720	1	430	69	26868	0.671967
GO:0009408	response to heat	biological_process	5	LOC_Os05g27730;LOC_Os01g61080	2	430	145	26868	0.677106
GO:0015250	water channel activity	molecular_function	7	LOC_Os02g57720	1	430	70	26868	0.677231
GO:0071554	cell wall organization or biogenesis	biological_process	4	LOC_Os06g16240	1	430	70	26868	0.677231
GO:0030163	protein catabolic process	biological_process	7	LOC_Os11g08100;LOC_Os01g62630;LOC_Os06g03120;LOC_Os05g33400	4	430	289	26868	0.681921
GO:0008233	peptidase activity	molecular_function	5	LOC_Os02g08270	1	430	71	26868	0.68241
GO:0016413	O-acetyltransferase activity	molecular_function	8	LOC_Os06g16240	1	430	72	26868	0.687506
GO:0034220	ion transmembrane transport	biological_process	7	LOC_Os02g57720	1	430	73	26868	0.692521
GO:0009813	flavonoid biosynthetic process	biological_process	6	LOC_Os04g53850;LOC_Os06g18790;LOC_Os04g53810;LOC_Os07g34260;LOC_Os04g25440	5	430	366	26868	0.699303
GO:0016887	ATPase activity	molecular_function	9	LOC_Os03g58790;LOC_Os12g24320	2	430	152	26868	0.701926
GO:0003690	double-stranded DNA binding	molecular_function	7	LOC_Os05g34160	1	430	75	26868	0.702311
GO:0005874	microtubule	cellular_component	7	LOC_Os09g39960	1	430	76	26868	0.707088
GO:0043161	proteasome-mediated ubiquitin-dependent protein catabolic process	biological_process	11	LOC_Os06g34450;LOC_Os01g16950;LOC_Os02g01700;LOC_Os11g34080	4	430	301	26868	0.712125
GO:0046983	protein dimerization activity	molecular_function	5	LOC_Os01g50940	1	430	79	26868	0.720967
GO:0007165	signal transduction	biological_process	4	LOC_Os11g35410;LOC_Os11g31540;LOC_Os03g17700;LOC_Os11g35450;LOC_Os01g53920	5	430	376	26868	0.72134
GO:0005777	peroxisome	cellular_component	7	LOC_Os03g03790;LOC_Os07g17330	2	430	160	26868	0.728331
GO:0009570	chloroplast stroma	cellular_component	8	LOC_Os04g58710;LOC_Os02g47560;LOC_Os12g24650;LOC_Os07g09190;LOC_Os08g28240;LOC_Os05g35580	6	430	453	26868	0.734476
GO:0012505	endomembrane system	cellular_component	4	LOC_Os08g01120;LOC_Os11g12320	2	430	166	26868	0.746813
GO:0009524	phragmoplast	cellular_component	6	LOC_Os09g39960	1	430	87	26868	0.754852
GO:0048366	leaf development	biological_process	7	LOC_Os03g52320	1	430	88	26868	0.758788
GO:0005802	trans-Golgi network	cellular_component	7	LOC_Os01g48610;LOC_Os01g51870;LOC_Os03g19310	3	430	254	26868	0.775018
GO:0044212	transcription regulatory region DNA binding	molecular_function	7	LOC_Os02g49440;LOC_Os01g14440	2	430	176	26868	0.775219
GO:0003729	mRNA binding	molecular_function	7	LOC_Os05g43390	1	430	93	26868	0.777543
GO:0046982	protein heterodimerization activity	molecular_function	6	LOC_Os02g09830	1	430	95	26868	0.784631
GO:0007049	cell cycle	biological_process	4	LOC_Os09g39960	1	430	95	26868	0.784631
GO:0042631	cellular response to water deprivation	biological_process	6	LOC_Os10g37340	1	430	96	26868	0.78809
GO:0005768	endosome	cellular_component	7	LOC_Os03g19310;LOC_Os01g51870;LOC_Os01g48610	3	430	261	26868	0.790474
GO:0016310	phosphorylation	biological_process	7	LOC_Os08g24310;LOC_Os01g04580;LOC_Os11g07225	3	430	269	26868	0.80705
GO:0000287	magnesium ion binding	molecular_function	7	LOC_Os03g46640	1	430	107	26868	0.822669
GO:0008270	zinc ion binding	molecular_function	8	LOC_Os01g60640;LOC_Os11g34080;LOC_Os04g15920;LOC_Os06g13030;LOC_Os04g41960;LOC_Os11g06590;LOC_Os09g31200;LOC_Os12g12560;LOC_Os08g43190;LOC_Os12g12580;LOC_Os04g40630;LOC_Os11g45990	12	430	945	26868	0.830164
GO:0006470	protein dephosphorylation	biological_process	9	LOC_Os03g10950	1	430	110	26868	0.831081
GO:0005622	intracellular	cellular_component	4	LOC_Os02g06640;LOC_Os06g11210;LOC_Os06g11240	3	430	286	26868	0.838627
GO:0042802	identical protein binding	molecular_function	5	LOC_Os11g14380;LOC_Os01g58890;LOC_Os07g34260	3	430	289	26868	0.843713
GO:0061630	ubiquitin protein ligase activity	molecular_function	7	LOC_Os06g34450;LOC_Os01g16950;LOC_Os02g01700;LOC_Os04g50760	4	430	373	26868	0.850088
GO:0006508	proteolysis	biological_process	7	LOC_Os12g24650;LOC_Os01g62630;LOC_Os11g08100;LOC_Os05g33400;LOC_Os06g03120	5	430	457	26868	0.858124
GO:0016192	vesicle-mediated transport	biological_process	6	LOC_Os09g39960	1	430	122	26868	0.860931
GO:0009579	thylakoid	cellular_component	5	LOC_Os02g51710	1	430	127	26868	0.871757
GO:0000139	Golgi membrane	cellular_component	7	LOC_Os09g27950;LOC_Os03g19310	2	430	233	26868	0.889436
GO:0071472	cellular response to salt stress	biological_process	7	LOC_Os06g11860	1	430	139	26868	0.894432
GO:0030154	cell differentiation	biological_process	5	LOC_Os12g43640	1	430	140	26868	0.89613
GO:0043231	intracellular membrane-bounded organelle	cellular_component	5	LOC_Os06g18790;LOC_Os04g25440;LOC_Os01g63930;LOC_Os05g37250	4	430	411	26868	0.897079
GO:0009705	plant-type vacuole membrane	cellular_component	8	LOC_Os06g36450	1	430	141	26868	0.897801
GO:0005794	Golgi apparatus	cellular_component	6	LOC_Os08g37840;LOC_Os02g51610;LOC_Os06g16240;LOC_Os03g19310;LOC_Os02g52010;LOC_Os09g27950;LOC_Os09g25760;LOC_Os02g55970;LOC_Os01g48610;LOC_Os08g01940;LOC_Os06g35520	11	430	955	26868	0.900724
GO:0009723	response to ethylene	biological_process	6	LOC_Os11g45740	1	430	143	26868	0.901063
GO:0008757	S-adenosylmethionine-dependent methyltransferase activity	molecular_function	7	LOC_Os01g51870	1	430	150	26868	0.911684
GO:0005507	copper ion binding	molecular_function	8	LOC_Os11g06590	1	430	158	26868	0.922436
GO:0071013	catalytic step 2 spliceosome	cellular_component	7	LOC_Os02g14780	1	430	166	26868	0.931881
GO:0045893	positive regulation of transcription, DNA-templated	biological_process	9	LOC_Os09g16510	1	430	166	26868	0.931881
GO:0005975	carbohydrate metabolic process	biological_process	5	LOC_Os02g01510	1	430	169	26868	0.93512
GO:0051301	cell division	biological_process	4	LOC_Os09g39960	1	430	175	26868	0.941143
GO:0006886	intracellular protein transport	biological_process	10	LOC_Os01g47730	1	430	179	26868	0.944845
GO:0006511	ubiquitin-dependent protein catabolic process	biological_process	10	LOC_Os02g06640	1	430	181	26868	0.946608
GO:0080043	quercetin 3-O-glucosyltransferase activity	molecular_function	8	LOC_Os06g18790;LOC_Os04g25440	2	430	290	26868	0.947756
GO:0080044	quercetin 7-O-glucosyltransferase activity	molecular_function	8	LOC_Os04g25440;LOC_Os06g18790	2	430	290	26868	0.947756
GO:0016042	lipid catabolic process	biological_process	6	LOC_Os02g43700	1	430	187	26868	0.951567
GO:0005783	endoplasmic reticulum	cellular_component	6	LOC_Os11g44940;LOC_Os03g58790;LOC_Os12g24320;LOC_Os03g14000;LOC_Os06g15170	5	430	570	26868	0.952005
GO:0009793	embryo development ending in seed dormancy	biological_process	5	LOC_Os02g14480;LOC_Os01g54600	2	430	308	26868	0.95903
GO:0071555	cell wall organization	biological_process	6	LOC_Os01g66840	1	430	206	26868	0.964434
GO:0052696	flavonoid glucuronidation	biological_process	6	LOC_Os04g25440;LOC_Os06g18790	2	430	319	26868	0.964731
GO:0009733	response to auxin	biological_process	6	LOC_Os04g40630	1	430	211	26868	0.967211
GO:0015031	protein transport	biological_process	9	LOC_Os03g15230	1	430	229	26868	0.975535
GO:0009941	chloroplast envelope	cellular_component	7	LOC_Os02g47560;LOC_Os01g52240	2	430	395	26868	0.987754
GO:0004252	serine-type endopeptidase activity	molecular_function	8	LOC_Os10g33140	1	430	272	26868	0.987855
GO:0000166	nucleotide binding	molecular_function	5	LOC_Os11g12320;LOC_Os02g35200	2	430	406	26868	0.989522
GO:0005739	mitochondrion	cellular_component	6	LOC_Os11g06590;LOC_Os03g15230;LOC_Os01g53910;LOC_Os04g58710;LOC_Os01g11860;LOC_Os08g01120;LOC_Os01g63690;LOC_Os01g67950;LOC_Os03g03790;LOC_Os09g39960;LOC_Os03g03200;LOC_Os05g34160;LOC_Os02g33070;LOC_Os11g40840;LOC_Os07g17330;LOC_Os03g01140;LOC_Os06g04990;LOC_Os12g24320	18	430	1813	26868	0.991014
GO:0006412	translation	biological_process	8	LOC_Os11g34940	1	430	310	26868	0.993465
GO:0003676	nucleic acid binding	molecular_function	5	LOC_Os05g45020	1	430	348	26868	0.996487
GO:0003735	structural constituent of ribosome	molecular_function	4	LOC_Os11g34940	1	430	386	26868	0.998113
GO:0005528	FK506 binding	molecular_function	6	LOC_Os01g38229	1	430	399	26868	0.998475
GO:0061077	chaperone-mediated protein folding	biological_process	5	LOC_Os01g38229	1	430	408	26868	0.998684
GO:0005789	endoplasmic reticulum membrane	cellular_component	5	LOC_Os01g38229;LOC_Os06g15170;LOC_Os03g14000	3	430	672	26868	0.998725
GO:0051015	actin filament binding	molecular_function	7	LOC_Os06g13030	1	430	420	26868	0.998919
GO:0003755	peptidyl-prolyl cis-trans isomerase activity	molecular_function	6	LOC_Os01g38229	1	430	433	26868	0.999127
GO:0009536	plastid	cellular_component	6	LOC_Os05g35580	1	430	435	26868	0.999155
GO:0006897	endocytosis	biological_process	7	LOC_Os02g55970	1	430	449	26868	0.999328
GO:0003723	RNA binding	molecular_function	6	LOC_Os02g14780	1	430	530	26868	0.999823

## Sheet: Table S3-4
Table S3-4 GO enrichment analysis of S0_S3-up DEGs.
GO_ID	GO_Term	GO_function	GO_class	Genes	S gene number	TS gene number	B gene number	TB gene number	pvalue
GO:0006979	response to oxidative stress	biological_process	5	LOC_Os05g35290;LOC_Os12g26290;LOC_Os10g02070;LOC_Os04g49370;LOC_Os01g21250;LOC_Os02g45930;LOC_Os02g14170;LOC_Os01g53730;LOC_Os05g44900;LOC_Os03g13210	10	169	194	26868	4.51347e-07
GO:0009611	response to wounding	biological_process	5	LOC_Os08g34790;LOC_Os03g08330;LOC_Os08g39850;LOC_Os01g63930;LOC_Os02g48770;LOC_Os10g25290;LOC_Os03g08320;LOC_Os06g13560;LOC_Os09g25060;LOC_Os05g35290	10	169	228	26868	1.95838e-06
GO:0031347	regulation of defense response	biological_process	7	LOC_Os12g02450;LOC_Os03g08330;LOC_Os03g08320;LOC_Os09g25060;LOC_Os05g25770;LOC_Os10g25290	6	169	63	26868	2.86111e-06
GO:0050832	defense response to fungus	biological_process	8	LOC_Os12g02450;LOC_Os12g26290;LOC_Os01g53920;LOC_Os05g25770;LOC_Os01g61080;LOC_Os03g30470;LOC_Os06g51060;LOC_Os10g39680;LOC_Os09g25060	9	169	190	26868	3.45265e-06
GO:0010200	response to chitin	biological_process	7	LOC_Os05g45410;LOC_Os01g53920;LOC_Os01g61080;LOC_Os09g25060;LOC_Os12g02450;LOC_Os05g25770;LOC_Os10g41330	7	169	107	26868	5.28804e-06
GO:0051707	response to other organism	biological_process	6	LOC_Os08g39850;LOC_Os10g05660;LOC_Os07g05110;LOC_Os12g38150;LOC_Os12g26290	5	169	52	26868	1.89871e-05
GO:0004568	chitinase activity	molecular_function	7	LOC_Os06g25010;LOC_Os06g51060;LOC_Os10g39680;LOC_Os03g30470;LOC_Os06g24990	5	169	62	26868	4.49381e-05
GO:0071456	cellular response to hypoxia	biological_process	6	LOC_Os09g29690;LOC_Os11g44680;LOC_Os09g29710	3	169	12	26868	5.15872e-05
GO:0016747	transferase activity, transferring acyl groups other than amino-acyl groups	molecular_function	6	LOC_Os02g11070;LOC_Os09g34930;LOC_Os10g35950;LOC_Os01g08380;LOC_Os01g63480;LOC_Os11g07960	6	169	125	26868	0.000143285
GO:0004601	peroxidase activity	molecular_function	4	LOC_Os02g14170;LOC_Os10g02070;LOC_Os03g13210;LOC_Os12g26290;LOC_Os04g59260;LOC_Os04g59150;LOC_Os01g73200	7	169	182	26868	0.000159745
GO:0051762	sesquiterpene biosynthetic process	biological_process	10	LOC_Os04g27190;LOC_Os04g01810;LOC_Os04g27670	3	169	18	26868	0.000186099
GO:0006040	amino sugar metabolic process	biological_process	6	LOC_Os10g39680;LOC_Os03g30470	2	169	4	26868	0.000234038
GO:0016231	beta-N-acetylglucosaminidase activity	molecular_function	9	LOC_Os10g39680;LOC_Os03g30470	2	169	4	26868	0.000234038
GO:0008843	endochitinase activity	molecular_function	8	LOC_Os03g30470;LOC_Os10g39680	2	169	4	26868	0.000234038
GO:1903507	negative regulation of nucleic acid-templated transcription	biological_process	10	LOC_Os03g08320;LOC_Os10g25290;LOC_Os03g08330	3	169	21	26868	0.000299145
GO:0016607	nuclear speck	cellular_component	8	LOC_Os02g45930;LOC_Os04g49370;LOC_Os05g44900;LOC_Os01g53730	4	169	57	26868	0.000460187
GO:0008061	chitin binding	molecular_function	5	LOC_Os06g24990;LOC_Os10g39680;LOC_Os03g30470;LOC_Os06g25010	4	169	60	26868	0.000559843
GO:0010334	sesquiterpene synthase activity	molecular_function	8	LOC_Os04g27670;LOC_Os04g01810;LOC_Os04g27190	3	169	26	26868	0.000571445
GO:0003714	transcription corepressor activity	molecular_function	5	LOC_Os03g08320;LOC_Os03g08330;LOC_Os10g25290	3	169	27	26868	0.000639916
GO:0016114	terpenoid biosynthetic process	biological_process	9	LOC_Os07g09190;LOC_Os02g02930	2	169	7	26868	0.000809007
GO:0031408	oxylipin biosynthetic process	biological_process	11	LOC_Os06g13560;LOC_Os02g48770;LOC_Os12g26290	3	169	31	26868	0.000965421
GO:0055114	oxidation-reduction process	biological_process	4	LOC_Os12g12580;LOC_Os01g63930;LOC_Os11g10510;LOC_Os01g47760;LOC_Os04g33240;LOC_Os02g14170;LOC_Os07g40250;LOC_Os03g13210;LOC_Os01g27230;LOC_Os10g02070;LOC_Os12g12560;LOC_Os06g11210;LOC_Os04g15920;LOC_Os03g04370	14	169	852	26868	0.00102666
GO:0045723	positive regulation of fatty acid biosynthetic process	biological_process	9	LOC_Os11g03540;LOC_Os12g03290	2	169	8	26868	0.00107422
GO:1901959	positive regulation of cutin biosynthetic process	biological_process	9	LOC_Os12g03290;LOC_Os11g03540	2	169	8	26868	0.00107422
GO:2000022	regulation of jasmonic acid mediated signaling pathway	biological_process	8	LOC_Os10g25290;LOC_Os03g08330;LOC_Os03g08320	3	169	33	26868	0.00116107
GO:0047461	(+)-delta-cadinene synthase activity	molecular_function	9	LOC_Os04g27190;LOC_Os04g27340	2	169	9	26868	0.00137543
GO:0003954	NADH dehydrogenase activity	molecular_function	6	LOC_Os07g37730;LOC_Os08g04630	2	169	9	26868	0.00137543
GO:1901928	cadinene biosynthetic process	biological_process	11	LOC_Os04g27190;LOC_Os04g27340	2	169	9	26868	0.00137543
GO:0042742	defense response to bacterium	biological_process	8	LOC_Os05g25770;LOC_Os09g25060;LOC_Os12g26290;LOC_Os01g61080;LOC_Os11g44680;LOC_Os12g02450	6	169	209	26868	0.00213547
GO:0003700	DNA-binding transcription factor activity	molecular_function	4	LOC_Os03g55590;LOC_Os09g25070;LOC_Os01g50940;LOC_Os12g02450;LOC_Os11g45740;LOC_Os01g46870;LOC_Os11g29870;LOC_Os05g25770;LOC_Os11g03300;LOC_Os10g41330;LOC_Os06g44010;LOC_Os05g45410;LOC_Os01g61080;LOC_Os11g44680;LOC_Os12g03040;LOC_Os09g25060;LOC_Os11g03540;LOC_Os12g03290	18	169	1353	26868	0.00223294
GO:0009862	systemic acquired resistance, salicylic acid mediated signaling pathway	biological_process	6	LOC_Os12g02450;LOC_Os05g25770	2	169	12	26868	0.00249052
GO:0003959	NADPH dehydrogenase activity	molecular_function	6	LOC_Os06g11210;LOC_Os01g27230	2	169	12	26868	0.00249052
GO:0030795	jasmonate O-methyltransferase activity	molecular_function	8	LOC_Os06g13560;LOC_Os02g48770	2	169	12	26868	0.00249052
GO:0002237	response to molecule of bacterial origin	biological_process	6	LOC_Os09g25060;LOC_Os11g44680	2	169	13	26868	0.00293121
GO:0009864	induced systemic resistance, jasmonic acid mediated signaling pathway	biological_process	6	LOC_Os05g25770;LOC_Os12g02450	2	169	13	26868	0.00293121
GO:0009751	response to salicylic acid	biological_process	6	LOC_Os09g25060;LOC_Os01g47760;LOC_Os05g25770;LOC_Os12g02450;LOC_Os12g26290	5	169	166	26868	0.0040677
GO:0009867	jasmonic acid mediated signaling pathway	biological_process	6	LOC_Os06g13560;LOC_Os02g48770;LOC_Os01g47760	3	169	51	26868	0.00408001
GO:0020037	heme binding	molecular_function	6	LOC_Os12g26290;LOC_Os02g14170;LOC_Os03g13210;LOC_Os10g02070;LOC_Os01g63930	5	169	167	26868	0.00417235
GO:0009620	response to fungus	biological_process	7	LOC_Os11g45740;LOC_Os11g44680;LOC_Os08g34790	3	169	52	26868	0.00431002
GO:0009685	gibberellin metabolic process	biological_process	10	LOC_Os09g25070;LOC_Os06g44010	2	169	17	26868	0.00502715
GO:0045338	farnesyl diphosphate metabolic process	biological_process	8	LOC_Os04g27190;LOC_Os04g27670	2	169	17	26868	0.00502715
GO:0030247	polysaccharide binding	molecular_function	5	LOC_Os01g55820;LOC_Os03g45390;LOC_Os01g71340;LOC_Os01g71350	4	169	110	26868	0.00520025
GO:0009694	jasmonic acid metabolic process	biological_process	9	LOC_Os02g48770;LOC_Os06g13560	2	169	18	26868	0.00563229
GO:0046686	response to cadmium ion	biological_process	7	LOC_Os05g44900;LOC_Os01g53730;LOC_Os11g10510;LOC_Os03g13300;LOC_Os02g45930;LOC_Os04g49370	6	169	256	26868	0.00574951
GO:0030170	pyridoxal phosphate binding	molecular_function	6	LOC_Os03g13300;LOC_Os10g37340;LOC_Os04g52440;LOC_Os06g07960	4	169	114	26868	0.00589574
GO:0009753	response to jasmonic acid	biological_process	6	LOC_Os12g02450;LOC_Os12g03040;LOC_Os11g45740;LOC_Os05g25770	4	169	116	26868	0.00626562
GO:1900056	negative regulation of leaf senescence	biological_process	10	LOC_Os05g25770;LOC_Os12g02450	2	169	19	26868	0.00626903
GO:0010055	atrichoblast differentiation	biological_process	8	LOC_Os11g29870	1	169	1	26868	0.00629001
GO:0034007	S-linalool synthase activity	molecular_function	7	LOC_Os02g02930	1	169	1	26868	0.00629001
GO:0032107	regulation of response to nutrient levels	biological_process	8	LOC_Os11g29870	1	169	1	26868	0.00629001
GO:0050691	regulation of defense response to virus by host	biological_process	8	LOC_Os09g25060	1	169	1	26868	0.00629001
GO:0034614	cellular response to reactive oxygen species	biological_process	7	LOC_Os12g26290	1	169	1	26868	0.00629001
GO:0019458	methionine catabolic process via 2-oxobutanoate	biological_process	12	LOC_Os10g37340	1	169	1	26868	0.00629001
GO:0001561	fatty acid alpha-oxidation	biological_process	11	LOC_Os12g26290	1	169	1	26868	0.00629001
GO:0018826	methionine gamma-lyase activity	molecular_function	6	LOC_Os10g37340	1	169	1	26868	0.00629001
GO:0000302	response to reactive oxygen species	biological_process	6	LOC_Os01g21250;LOC_Os05g45410	2	169	21	26868	0.00763568
GO:0045551	cinnamyl-alcohol dehydrogenase activity	molecular_function	7	LOC_Os04g15920;LOC_Os06g44170	2	169	23	26868	0.00912383
GO:0042626	ATPase-coupled transmembrane transporter activity	molecular_function	8	LOC_Os01g42380;LOC_Os08g29570;LOC_Os09g29660;LOC_Os01g50100	4	169	130	26868	0.00929176
GO:0006351	transcription, DNA-templated	biological_process	8	LOC_Os05g45410;LOC_Os01g61080;LOC_Os12g02450;LOC_Os09g25060;LOC_Os03g55590;LOC_Os05g25770;LOC_Os01g46870;LOC_Os10g41330;LOC_Os11g03540;LOC_Os11g03300;LOC_Os11g45740;LOC_Os12g03040;LOC_Os03g52320;LOC_Os01g50940;LOC_Os11g29870	15	169	1215	26868	0.00995211
GO:0005576	extracellular region	cellular_component	3	LOC_Os09g29690;LOC_Os03g13210;LOC_Os10g02070;LOC_Os06g25010;LOC_Os10g05660;LOC_Os03g09070;LOC_Os01g63930;LOC_Os06g24990;LOC_Os12g26290;LOC_Os09g29710;LOC_Os02g14170;LOC_Os03g19990;LOC_Os12g38150;LOC_Os03g48626;LOC_Os10g36090;LOC_Os03g28980	16	169	1338	26868	0.0104561
GO:0042744	hydrogen peroxide catabolic process	biological_process	8	LOC_Os03g13210;LOC_Os10g02070;LOC_Os02g14170	3	169	72	26868	0.0106162
GO:0019279	L-methionine biosynthetic process from L-homoserine via cystathionine	biological_process	12	LOC_Os06g07960	1	169	2	26868	0.0125407
GO:0009970	cellular response to sulfate starvation	biological_process	9	LOC_Os10g37340	1	169	2	26868	0.0125407
GO:0009697	salicylic acid biosynthetic process	biological_process	8	LOC_Os11g44680	1	169	2	26868	0.0125407
GO:0004121	cystathionine beta-lyase activity	molecular_function	6	LOC_Os06g07960	1	169	2	26868	0.0125407
GO:0047974	guanosine deaminase activity	molecular_function	7	LOC_Os07g14150	1	169	2	26868	0.0125407
GO:0003991	acetylglutamate kinase activity	molecular_function	7	LOC_Os02g44000	1	169	2	26868	0.0125407
GO:0031304	intrinsic component of mitochondrial inner membrane	cellular_component	7	LOC_Os07g37730	1	169	2	26868	0.0125407
GO:0052865	1-deoxy-D-xylulose 5-phosphate biosynthetic process	biological_process	8	LOC_Os07g09190	1	169	2	26868	0.0125407
GO:0034005	germacrene-A synthase activity	molecular_function	9	LOC_Os04g27190	1	169	2	26868	0.0125407
GO:0043620	regulation of DNA-templated transcription in response to stress	biological_process	9	LOC_Os11g29870	1	169	2	26868	0.0125407
GO:0034618	arginine binding	molecular_function	8	LOC_Os02g44000	1	169	2	26868	0.0125407
GO:0033528	S-methylmethionine cycle	biological_process	7	LOC_Os10g28630	1	169	2	26868	0.0125407
GO:0006952	defense response	biological_process	5	LOC_Os11g39420;LOC_Os07g35370;LOC_Os07g35390;LOC_Os01g53920;LOC_Os05g35290;LOC_Os11g45740;LOC_Os07g35690;LOC_Os09g25070;LOC_Os06g44010;LOC_Os04g56430;LOC_Os01g21250	11	169	835	26868	0.0168601
GO:0046658	anchored component of plasma membrane	cellular_component	6	LOC_Os08g37660;LOC_Os01g71350;LOC_Os03g45390;LOC_Os01g71340;LOC_Os01g55820	5	169	237	26868	0.0172712
GO:0080142	regulation of salicylic acid biosynthetic process	biological_process	9	LOC_Os11g44680	1	169	3	26868	0.0187523
GO:0016838	carbon-oxygen lyase activity, acting on phosphates	molecular_function	6	LOC_Os04g01810	1	169	3	26868	0.0187523
GO:1900039	positive regulation of cellular response to hypoxia	biological_process	7	LOC_Os11g10510	1	169	3	26868	0.0187523
GO:1902609	(R)-2-hydroxy-alpha-linolenic acid biosynthetic process	biological_process	12	LOC_Os12g26290	1	169	3	26868	0.0187523
GO:0016166	phytoene dehydrogenase activity	molecular_function	6	LOC_Os08g39850	1	169	3	26868	0.0187523
GO:0009413	response to flooding	biological_process	5	LOC_Os11g10510	1	169	3	26868	0.0187523
GO:0052747	sinapyl alcohol dehydrogenase activity	molecular_function	7	LOC_Os04g15920	1	169	3	26868	0.0187523
GO:0008661	1-deoxy-D-xylulose-5-phosphate synthase activity	molecular_function	6	LOC_Os07g09190	1	169	3	26868	0.0187523
GO:0032355	response to estradiol	biological_process	6	LOC_Os11g10510	1	169	3	26868	0.0187523
GO:0031000	response to caffeine	biological_process	6	LOC_Os11g10510	1	169	3	26868	0.0187523
GO:0009409	response to cold	biological_process	5	LOC_Os11g10510;LOC_Os02g11070;LOC_Os10g17454;LOC_Os01g21250;LOC_Os01g61080	5	169	250	26868	0.0212024
GO:0016740	transferase activity	molecular_function	4	LOC_Os11g07960;LOC_Os12g24020;LOC_Os01g08380;LOC_Os01g63480	4	169	168	26868	0.0218351
GO:0009737	response to abscisic acid	biological_process	6	LOC_Os01g21250;LOC_Os11g10510;LOC_Os11g45740;LOC_Os12g26290;LOC_Os06g48250;LOC_Os12g03290	6	169	345	26868	0.0222803
GO:0009695	jasmonic acid biosynthetic process	biological_process	10	LOC_Os02g48770;LOC_Os06g13560	2	169	38	26868	0.0238418
GO:0008898	S-adenosylmethionine-homocysteine S-methyltransferase activity	molecular_function	8	LOC_Os10g28630	1	169	4	26868	0.024925
GO:0010333	terpene synthase activity	molecular_function	7	LOC_Os02g02930	1	169	4	26868	0.024925
GO:0045339	farnesyl diphosphate catabolic process	biological_process	9	LOC_Os04g01810	1	169	4	26868	0.024925
GO:0010112	regulation of systemic acquired resistance	biological_process	8	LOC_Os11g44680	1	169	4	26868	0.024925
GO:0045333	cellular respiration	biological_process	7	LOC_Os11g10510	1	169	4	26868	0.024925
GO:0033743	peptide-methionine (R)-S-oxide reductase activity	molecular_function	7	LOC_Os03g04370	1	169	4	26868	0.024925
GO:0071732	cellular response to nitric oxide	biological_process	8	LOC_Os12g26290	1	169	4	26868	0.024925
GO:0009955	adaxial/abaxial pattern specification	biological_process	6	LOC_Os03g52320	1	169	4	26868	0.024925
GO:0009873	ethylene-activated signaling pathway	biological_process	7	LOC_Os01g46870;LOC_Os10g41330;LOC_Os11g03540;LOC_Os12g03290	4	169	178	26868	0.0262905
GO:0040008	regulation of growth	biological_process	5	LOC_Os07g05110;LOC_Os12g03290	2	169	41	26868	0.0274718
GO:0006355	regulation of transcription, DNA-templated	biological_process	8	LOC_Os01g50940;LOC_Os03g52320;LOC_Os09g25060;LOC_Os11g03540;LOC_Os12g03290;LOC_Os12g03040;LOC_Os05g25770;LOC_Os11g45740;LOC_Os11g03300;LOC_Os12g02450;LOC_Os10g41330;LOC_Os05g45410;LOC_Os11g44680;LOC_Os11g29870;LOC_Os01g46870;LOC_Os03g55590;LOC_Os01g61080	17	169	1627	26868	0.027724
GO:0009505	plant-type cell wall	cellular_component	6	LOC_Os04g59150;LOC_Os03g28980;LOC_Os03g19990;LOC_Os04g59260;LOC_Os01g73200	5	169	271	26868	0.0287089
GO:0004553	hydrolase activity, hydrolyzing O-glycosyl compounds	molecular_function	6	LOC_Os01g71340;LOC_Os01g71350;LOC_Os01g55820;LOC_Os03g45390	4	169	184	26868	0.029207
GO:0032259	methylation	biological_process	4	LOC_Os10g28630;LOC_Os02g48770;LOC_Os06g13560;LOC_Os01g51870	4	169	185	26868	0.029711
GO:0016491	oxidoreductase activity	molecular_function	4	LOC_Os12g12560;LOC_Os04g33240;LOC_Os07g40250;LOC_Os07g46920;LOC_Os12g12580	5	169	275	26868	0.0303067
GO:0012511	monolayer-surrounded lipid storage body	cellular_component	7	LOC_Os12g26290	1	169	5	26868	0.0310592
GO:0045995	regulation of embryonic development	biological_process	7	LOC_Os12g03040	1	169	5	26868	0.0310592
GO:0043693	monoterpene biosynthetic process	biological_process	10	LOC_Os02g02930	1	169	5	26868	0.0310592
GO:0019374	galactolipid metabolic process	biological_process	9	LOC_Os07g05110	1	169	5	26868	0.0310592
GO:0006032	chitin catabolic process	biological_process	8	LOC_Os06g24990;LOC_Os06g25010	2	169	46	26868	0.0339768
GO:0052325	cell wall pectin biosynthetic process	biological_process	9	LOC_Os11g07960	1	169	6	26868	0.037155
GO:0004792	thiosulfate sulfurtransferase activity	molecular_function	7	LOC_Os12g24020	1	169	6	26868	0.037155
GO:0071446	cellular response to salicylic acid stimulus	biological_process	7	LOC_Os12g26290	1	169	6	26868	0.037155
GO:0004351	glutamate decarboxylase activity	molecular_function	7	LOC_Os03g13300	1	169	6	26868	0.037155
GO:0050734	hydroxycinnamoyltransferase activity	molecular_function	7	LOC_Os11g07960	1	169	6	26868	0.037155
GO:0019288	isopentenyl diphosphate biosynthetic process, methylerythritol 4-phosphate pathway	biological_process	10	LOC_Os07g09190	1	169	7	26868	0.0432126
GO:0071219	cellular response to molecule of bacterial origin	biological_process	7	LOC_Os11g44680	1	169	7	26868	0.0432126
GO:0006555	methionine metabolic process	biological_process	10	LOC_Os10g28350	1	169	7	26868	0.0432126
GO:0016702	oxidoreductase activity, acting on single donors with incorporation of molecular oxygen, incorporation of two atoms of oxygen	molecular_function	6	LOC_Os12g26290	1	169	7	26868	0.0432126
GO:0051289	protein homotetramerization	biological_process	9	LOC_Os10g37340	1	169	7	26868	0.0432126
GO:0006536	glutamate metabolic process	biological_process	11	LOC_Os03g13300	1	169	7	26868	0.0432126
GO:0009228	thiamine biosynthetic process	biological_process	8	LOC_Os07g09190	1	169	7	26868	0.0432126
GO:0010508	positive regulation of autophagy	biological_process	9	LOC_Os01g61080	1	169	7	26868	0.0432126
GO:1902584	positive regulation of response to water deprivation	biological_process	7	LOC_Os11g44680	1	169	7	26868	0.0432126
GO:0043565	sequence-specific DNA binding	molecular_function	7	LOC_Os11g44680;LOC_Os12g02450;LOC_Os05g25770;LOC_Os05g45410;LOC_Os09g25060;LOC_Os01g61080	6	169	417	26868	0.04879
GO:0047036	codeinone reductase (NADPH) activity	molecular_function	7	LOC_Os04g37490	1	169	8	26868	0.0492324
GO:0071482	cellular response to light stimulus	biological_process	7	LOC_Os07g37730	1	169	8	26868	0.0492324
GO:0048317	seed morphogenesis	biological_process	5	LOC_Os12g03040	1	169	8	26868	0.0492324
GO:0010120	camalexin biosynthetic process	biological_process	9	LOC_Os01g61080	1	169	8	26868	0.0492324
GO:0010224	response to UV-B	biological_process	8	LOC_Os11g44680;LOC_Os05g35290	2	169	59	26868	0.0532893
GO:0018685	alkane 1-monooxygenase activity	molecular_function	7	LOC_Os01g63930	1	169	9	26868	0.0552145
GO:0006529	asparagine biosynthetic process	biological_process	12	LOC_Os04g58280	1	169	9	26868	0.0552145
GO:0004332	fructose-bisphosphate aldolase activity	molecular_function	7	LOC_Os08g02700	1	169	9	26868	0.0552145
GO:0004066	asparagine synthase (glutamine-hydrolyzing) activity	molecular_function	7	LOC_Os04g58280	1	169	9	26868	0.0552145
GO:0000981	DNA-binding transcription factor activity, RNA polymerase II-specific	molecular_function	5	LOC_Os12g03290;LOC_Os11g03540	2	169	61	26868	0.0565378
GO:0009625	response to insect	biological_process	7	LOC_Os01g21250	1	169	10	26868	0.0611592
GO:0009800	cinnamic acid biosynthetic process	biological_process	8	LOC_Os05g35290	1	169	10	26868	0.0611592
GO:0046274	lignin catabolic process	biological_process	8	LOC_Os05g35290	1	169	10	26868	0.0611592
GO:0045548	phenylalanine ammonia-lyase activity	molecular_function	7	LOC_Os05g35290	1	169	10	26868	0.0611592
GO:0046244	salicylic acid catabolic process	biological_process	8	LOC_Os05g35290	1	169	10	26868	0.0611592
GO:0000304	response to singlet oxygen	biological_process	7	LOC_Os06g48250	1	169	10	26868	0.0611592
GO:0009698	phenylpropanoid metabolic process	biological_process	6	LOC_Os08g34790	1	169	10	26868	0.0611592
GO:0009414	response to water deprivation	biological_process	5	LOC_Os11g10510;LOC_Os01g21250;LOC_Os12g03290;LOC_Os01g61080	4	169	235	26868	0.0615194
GO:0009723	response to ethylene	biological_process	6	LOC_Os10g41200;LOC_Os11g45740;LOC_Os01g21250	3	169	143	26868	0.0617129
GO:0042803	protein homodimerization activity	molecular_function	6	LOC_Os04g58280;LOC_Os11g10510;LOC_Os05g45410	3	169	143	26868	0.0617129
GO:0009664	plant-type cell wall organization	biological_process	7	LOC_Os01g73200;LOC_Os04g59260;LOC_Os04g59150	3	169	147	26868	0.065895
GO:0004022	alcohol dehydrogenase (NAD) activity	molecular_function	7	LOC_Os11g10510	1	169	11	26868	0.0670667
GO:0070370	cellular heat acclimation	biological_process	7	LOC_Os01g61080	1	169	11	26868	0.0670667
GO:0002229	defense response to oomycetes	biological_process	8	LOC_Os11g44680	1	169	11	26868	0.0670667
GO:0005945	6-phosphofructokinase complex	cellular_component	7	LOC_Os05g10650	1	169	11	26868	0.0670667
GO:0006986	response to unfolded protein	biological_process	6	LOC_Os04g01740	1	169	12	26868	0.0729373
GO:0048825	cotyledon development	biological_process	6	LOC_Os01g46870	1	169	12	26868	0.0729373
GO:0010150	leaf senescence	biological_process	6	LOC_Os07g17330;LOC_Os01g21250	2	169	72	26868	0.0755538
GO:0080060	integument development	biological_process	5	LOC_Os12g03040	1	169	13	26868	0.0787711
GO:0006644	phospholipid metabolic process	biological_process	7	LOC_Os07g05110	1	169	13	26868	0.0787711
GO:0005777	peroxisome	cellular_component	7	LOC_Os07g37730;LOC_Os08g04630;LOC_Os07g17330	3	169	160	26868	0.0803485
GO:0008519	ammonium transmembrane transporter activity	molecular_function	7	LOC_Os03g62200	1	169	14	26868	0.0845685
GO:0016207	4-coumarate-CoA ligase activity	molecular_function	7	LOC_Os08g34790	1	169	14	26868	0.0845685
GO:0047617	acyl-CoA hydrolase activity	molecular_function	8	LOC_Os07g05110	1	169	14	26868	0.0845685
GO:0000038	very long-chain fatty acid metabolic process	biological_process	10	LOC_Os09g34930	1	169	14	26868	0.0845685
GO:0009646	response to absence of light	biological_process	8	LOC_Os01g21250	1	169	14	26868	0.0845685
GO:0006541	glutamine metabolic process	biological_process	11	LOC_Os04g58280	1	169	14	26868	0.0845685
GO:0015695	organic cation transport	biological_process	8	LOC_Os03g62200	1	169	14	26868	0.0845685
GO:0019740	nitrogen utilization	biological_process	3	LOC_Os03g62200	1	169	14	26868	0.0845685
GO:0003825	alpha,alpha-trehalose-phosphate synthase (UDP-forming) activity	molecular_function	8	LOC_Os08g31980	1	169	14	26868	0.0845685
GO:0072488	ammonium transmembrane transport	biological_process	9	LOC_Os03g62200	1	169	14	26868	0.0845685
GO:0003333	amino acid transmembrane transport	biological_process	11	LOC_Os03g60260;LOC_Os01g41420	2	169	78	26868	0.0866624
GO:0007275	multicellular organism development	biological_process	4	LOC_Os12g03040;LOC_Os12g03290;LOC_Os11g03300;LOC_Os11g03540	4	169	267	26868	0.0885472
GO:0042147	retrograde transport, endosome to Golgi	biological_process	8	LOC_Os03g09140	1	169	15	26868	0.0903295
GO:0015171	amino acid transmembrane transporter activity	molecular_function	7	LOC_Os03g60260;LOC_Os01g41420	2	169	81	26868	0.0923896
GO:0003872	6-phosphofructokinase activity	molecular_function	8	LOC_Os05g10650	1	169	16	26868	0.0960546
GO:0009086	methionine biosynthetic process	biological_process	11	LOC_Os10g28630	1	169	16	26868	0.0960546
GO:0006096	glycolytic process	biological_process	10	LOC_Os08g02700;LOC_Os05g10650	2	169	84	26868	0.0982238
GO:0006002	fructose 6-phosphate metabolic process	biological_process	7	LOC_Os05g10650	1	169	17	26868	0.101744
GO:0006526	arginine biosynthetic process	biological_process	12	LOC_Os02g44000	1	169	17	26868	0.101744
GO:0010187	negative regulation of seed germination	biological_process	10	LOC_Os12g03290	1	169	17	26868	0.101744
GO:0006813	potassium ion transport	biological_process	9	LOC_Os04g32920	1	169	17	26868	0.101744
GO:0008168	methyltransferase activity	molecular_function	6	LOC_Os10g28630;LOC_Os06g13560	2	169	87	26868	0.104159
GO:0048366	leaf development	biological_process	7	LOC_Os01g46870;LOC_Os03g52320	2	169	88	26868	0.106159
GO:0009863	salicylic acid mediated signaling pathway	biological_process	5	LOC_Os01g47760	1	169	19	26868	0.113016
GO:0006559	L-phenylalanine catabolic process	biological_process	11	LOC_Os05g35290	1	169	20	26868	0.118599
GO:0009627	systemic acquired resistance	biological_process	7	LOC_Os12g26290	1	169	20	26868	0.118599
GO:0009819	drought recovery	biological_process	6	LOC_Os05g35290	1	169	20	26868	0.118599
GO:0004620	phospholipase activity	molecular_function	7	LOC_Os07g05110	1	169	20	26868	0.118599
GO:0042631	cellular response to water deprivation	biological_process	6	LOC_Os10g37340;LOC_Os01g21250	2	169	96	26868	0.122514
GO:0009887	animal organ morphogenesis	biological_process	5	LOC_Os12g03290	1	169	21	26868	0.124147
GO:0005773	vacuole	cellular_component	6	LOC_Os03g09070;LOC_Os03g19990;LOC_Os03g48626;LOC_Os03g28980;LOC_Os05g18604	5	169	418	26868	0.124563
GO:0004674	protein serine/threonine kinase activity	molecular_function	8	LOC_Os08g24310;LOC_Os10g33040;LOC_Os04g56430;LOC_Os05g47770;LOC_Os09g17630;LOC_Os07g35390;LOC_Os11g39420;LOC_Os08g10290;LOC_Os05g44770;LOC_Os07g35370;LOC_Os07g35690;LOC_Os12g02200;LOC_Os11g03820	13	169	1453	26868	0.127813
GO:0048527	lateral root development	biological_process	8	LOC_Os11g29870	1	169	22	26868	0.12966
GO:0010345	suberin biosynthetic process	biological_process	8	LOC_Os11g07960	1	169	22	26868	0.12966
GO:0006890	retrograde vesicle-mediated transport, Golgi to endoplasmic reticulum	biological_process	8	LOC_Os03g09140	1	169	22	26868	0.12966
GO:0030014	CCR4-NOT complex	cellular_component	4	LOC_Os04g58810	1	169	23	26868	0.135139
GO:0005509	calcium ion binding	molecular_function	7	LOC_Os08g04630;LOC_Os09g30490;LOC_Os01g62430	3	169	204	26868	0.137878
GO:0009411	response to UV	biological_process	7	LOC_Os08g34790	1	169	24	26868	0.140584
GO:0009451	RNA modification	biological_process	9	LOC_Os07g14150	1	169	25	26868	0.145994
GO:0009789	positive regulation of abscisic acid-activated signaling pathway	biological_process	9	LOC_Os11g44680	1	169	25	26868	0.145994
GO:0010183	pollen tube guidance	biological_process	4	LOC_Os10g33040	1	169	25	26868	0.145994
GO:0015995	chlorophyll biosynthetic process	biological_process	9	LOC_Os07g09190	1	169	25	26868	0.145994
GO:0080156	mitochondrial mRNA modification	biological_process	11	LOC_Os10g17454	1	169	25	26868	0.145994
GO:0006468	protein phosphorylation	biological_process	9	LOC_Os12g02200;LOC_Os07g35390;LOC_Os10g33040;LOC_Os11g39420;LOC_Os05g44770;LOC_Os11g03820;LOC_Os04g56430;LOC_Os08g24310;LOC_Os07g35370;LOC_Os07g35690;LOC_Os10g30600	11	169	1222	26868	0.148626
GO:0034605	cellular response to heat	biological_process	6	LOC_Os01g61080	1	169	26	26868	0.151371
GO:0015706	nitrate transport	biological_process	9	LOC_Os05g35650	1	169	26	26868	0.151371
GO:0046620	regulation of organ growth	biological_process	7	LOC_Os09g37470	1	169	26	26868	0.151371
GO:0006633	fatty acid biosynthetic process	biological_process	10	LOC_Os09g34930;LOC_Os02g11070	2	169	110	26868	0.152431
GO:0009809	lignin biosynthetic process	biological_process	8	LOC_Os04g15920;LOC_Os02g14170	2	169	111	26868	0.154621
GO:0031463	Cul3-RING ubiquitin ligase complex	cellular_component	7	LOC_Os11g14140	1	169	27	26868	0.156714
GO:0000122	negative regulation of transcription by RNA polymerase II	biological_process	10	LOC_Os11g29870	1	169	27	26868	0.156714
GO:0004805	trehalose-phosphatase activity	molecular_function	9	LOC_Os08g31980	1	169	28	26868	0.162024
GO:0042335	cuticle development	biological_process	5	LOC_Os09g34930	1	169	28	26868	0.162024
GO:0000786	nucleosome	cellular_component	5	LOC_Os04g49420	1	169	28	26868	0.162024
GO:1901430	positive regulation of syringal lignin biosynthetic process	biological_process	9	LOC_Os02g14170	1	169	28	26868	0.162024
GO:0010053	root epidermal cell differentiation	biological_process	7	LOC_Os05g10650	1	169	29	26868	0.1673
GO:0006520	cellular amino acid metabolic process	biological_process	8	LOC_Os10g37340	1	169	29	26868	0.1673
GO:0015179	L-amino acid transmembrane transporter activity	molecular_function	8	LOC_Os04g35540	1	169	29	26868	0.1673
GO:0005544	calcium-dependent phospholipid binding	molecular_function	6	LOC_Os01g62430	1	169	30	26868	0.172544
GO:0008219	cell death	biological_process	4	LOC_Os12g26290	1	169	31	26868	0.177754
GO:0000288	nuclear-transcribed mRNA catabolic process, deadenylation-dependent decay	biological_process	12	LOC_Os04g58810	1	169	31	26868	0.177754
GO:0008285	negative regulation of cell population proliferation	biological_process	7	LOC_Os03g61500	1	169	31	26868	0.177754
GO:0000175	3'-5'-exoribonuclease activity	molecular_function	9	LOC_Os04g58810	1	169	31	26868	0.177754
GO:0009651	response to salt stress	biological_process	6	LOC_Os12g03290;LOC_Os01g61080;LOC_Os11g10510;LOC_Os11g45740	4	169	351	26868	0.180645
GO:0015079	potassium ion transmembrane transporter activity	molecular_function	9	LOC_Os04g32920	1	169	32	26868	0.182932
GO:0005992	trehalose biosynthetic process	biological_process	9	LOC_Os08g31980	1	169	32	26868	0.182932
GO:0008283	cell population proliferation	biological_process	3	LOC_Os03g52320	1	169	35	26868	0.198272
GO:0006891	intra-Golgi vesicle-mediated transport	biological_process	8	LOC_Os03g09140	1	169	36	26868	0.203322
GO:0045892	negative regulation of transcription, DNA-templated	biological_process	9	LOC_Os12g02450;LOC_Os05g25770	2	169	133	26868	0.204067
GO:0009816	defense response to bacterium, incompatible interaction	biological_process	7	LOC_Os11g44680	1	169	37	26868	0.208339
GO:0042938	dipeptide transport	biological_process	10	LOC_Os05g35650	1	169	38	26868	0.213326
GO:0008152	metabolic process	biological_process	3	LOC_Os02g02930;LOC_Os03g15270	2	169	140	26868	0.220167
GO:0005737	cytoplasm	cellular_component	5	LOC_Os03g13210;LOC_Os10g28630;LOC_Os05g35290;LOC_Os11g07960;LOC_Os10g35950;LOC_Os04g15920;LOC_Os04g33240;LOC_Os11g10510;LOC_Os10g02070;LOC_Os01g46870;LOC_Os01g63480;LOC_Os02g48770;LOC_Os06g13560;LOC_Os12g12580;LOC_Os08g02700;LOC_Os12g12560;LOC_Os05g45410;LOC_Os01g08380;LOC_Os01g47760;LOC_Os02g44820;LOC_Os12g24020;LOC_Os10g37340;LOC_Os01g50370;LOC_Os05g10650;LOC_Os10g38470	25	169	3380	26868	0.221703
GO:0009744	response to sucrose	biological_process	8	LOC_Os11g10510	1	169	40	26868	0.223205
GO:0004867	serine-type endopeptidase inhibitor activity	molecular_function	8	LOC_Os11g13540	1	169	40	26868	0.223205
GO:0009736	cytokinin-activated signaling pathway	biological_process	6	LOC_Os01g46870	1	169	41	26868	0.228098
GO:0009506	plasmodesma	cellular_component	5	LOC_Os07g35390;LOC_Os04g49420;LOC_Os10g33040;LOC_Os07g35690;LOC_Os07g35370;LOC_Os04g56430;LOC_Os11g39420	7	169	791	26868	0.231484
GO:0009408	response to heat	biological_process	5	LOC_Os01g61080;LOC_Os04g01740	2	169	145	26868	0.231732
GO:0090406	pollen tube	cellular_component	6	LOC_Os10g33040	1	169	42	26868	0.232961
GO:0019843	rRNA binding	molecular_function	7	LOC_Os05g03030	1	169	42	26868	0.232961
GO:0001046	core promoter sequence-specific DNA binding	molecular_function	9	LOC_Os11g29870	1	169	42	26868	0.232961
GO:0046564	oxalate decarboxylase activity	molecular_function	7	LOC_Os03g58980	1	169	43	26868	0.237793
GO:0033609	oxalate metabolic process	biological_process	9	LOC_Os03g58980	1	169	43	26868	0.237793
GO:0005774	vacuolar membrane	cellular_component	7	LOC_Os01g51870;LOC_Os03g19990;LOC_Os03g28980;LOC_Os04g49420	4	169	395	26868	0.237947
GO:0005886	plasma membrane	cellular_component	4	LOC_Os07g35370;LOC_Os10g30600;LOC_Os01g53920;LOC_Os11g03820;LOC_Os03g52910;LOC_Os09g29660;LOC_Os04g56430;LOC_Os01g42380;LOC_Os11g10510;LOC_Os10g33040;LOC_Os06g48250;LOC_Os03g04370;LOC_Os11g39420;LOC_Os05g35650;LOC_Os09g17630;LOC_Os08g29570;LOC_Os08g24310;LOC_Os07g05110;LOC_Os12g02200;LOC_Os08g10290;LOC_Os07g35390;LOC_Os04g49420;LOC_Os01g62430;LOC_Os07g35690;LOC_Os05g44770;LOC_Os05g47770	26	169	3569	26868	0.239478
GO:0008757	S-adenosylmethionine-dependent methyltransferase activity	molecular_function	7	LOC_Os01g51870;LOC_Os06g13560	2	169	150	26868	0.243335
GO:0015297	antiporter activity	molecular_function	7	LOC_Os04g35540	1	169	45	26868	0.247367
GO:0016887	ATPase activity	molecular_function	9	LOC_Os06g48250;LOC_Os04g01740	2	169	152	26868	0.247984
GO:0004190	aspartic-type endopeptidase activity	molecular_function	8	LOC_Os04g45270;LOC_Os02g48900;LOC_Os09g30414	3	169	274	26868	0.248362
GO:0003713	transcription coactivator activity	molecular_function	5	LOC_Os03g52320	1	169	46	26868	0.252109
GO:0042254	ribosome biogenesis	biological_process	6	LOC_Os05g03030	1	169	46	26868	0.252109
GO:0001666	response to hypoxia	biological_process	5	LOC_Os11g10510	1	169	47	26868	0.256822
GO:0030163	protein catabolic process	biological_process	7	LOC_Os04g45270;LOC_Os02g48900;LOC_Os09g30414	3	169	289	26868	0.27372
GO:0022626	cytosolic ribosome	cellular_component	7	LOC_Os05g03030	1	169	51	26868	0.275377
GO:0005743	mitochondrial inner membrane	cellular_component	6	LOC_Os08g04630	1	169	52	26868	0.279944
GO:0016125	sterol metabolic process	biological_process	7	LOC_Os03g55800	1	169	52	26868	0.279944
GO:0019825	oxygen binding	molecular_function	5	LOC_Os01g63930	1	169	53	26868	0.284482
GO:0009407	toxin catabolic process	biological_process	6	LOC_Os10g38470	1	169	55	26868	0.293473
GO:0003697	single-stranded DNA binding	molecular_function	7	LOC_Os10g17454	1	169	56	26868	0.297926
GO:0050662	coenzyme binding	molecular_function	5	LOC_Os06g44170	1	169	56	26868	0.297926
GO:0016829	lyase activity	molecular_function	4	LOC_Os06g07960	1	169	57	26868	0.302351
GO:0010089	xylem development	biological_process	7	LOC_Os02g14170	1	169	59	26868	0.311119
GO:0005840	ribosome	cellular_component	6	LOC_Os05g03030	1	169	59	26868	0.311119
GO:0005516	calmodulin binding	molecular_function	5	LOC_Os11g44680;LOC_Os03g13300	2	169	180	26868	0.313048
GO:0042542	response to hydrogen peroxide	biological_process	7	LOC_Os11g10510	1	169	61	26868	0.319777
GO:0006970	response to osmotic stress	biological_process	5	LOC_Os01g61080;LOC_Os11g10510	2	169	190	26868	0.336066
GO:0016298	lipase activity	molecular_function	6	LOC_Os01g54470	1	169	65	26868	0.33677
GO:0006855	drug transmembrane transport	biological_process	7	LOC_Os04g30490	1	169	66	26868	0.340951
GO:0004185	serine-type carboxypeptidase activity	molecular_function	9	LOC_Os05g18604	1	169	66	26868	0.340951
GO:0005515	protein binding	molecular_function	4	LOC_Os03g52320;LOC_Os01g61080;LOC_Os12g02450;LOC_Os07g09190;LOC_Os02g14170;LOC_Os04g01740;LOC_Os05g25770;LOC_Os05g45410;LOC_Os10g17454;LOC_Os09g25060;LOC_Os10g33040;LOC_Os01g47760;LOC_Os01g46870;LOC_Os12g02200;LOC_Os05g35290;LOC_Os06g50930	16	169	2259	26868	0.347558
GO:0009617	response to bacterium	biological_process	7	LOC_Os11g44680	1	169	68	26868	0.349237
GO:0005355	glucose transmembrane transporter activity	molecular_function	9	LOC_Os03g11900	1	169	71	26868	0.361471
GO:0046323	glucose import	biological_process	12	LOC_Os03g11900	1	169	71	26868	0.361471
GO:0009416	response to light stimulus	biological_process	6	LOC_Os01g21250;LOC_Os02g11070	2	169	208	26868	0.376882
GO:0009926	auxin polar transport	biological_process	8	LOC_Os09g37470	1	169	76	26868	0.381355
GO:0046872	metal ion binding	molecular_function	6	LOC_Os02g14170;LOC_Os03g13210;LOC_Os10g28630;LOC_Os10g02070;LOC_Os12g26290;LOC_Os07g09190;LOC_Os05g10650	7	169	943	26868	0.382423
GO:0015035	protein disulfide oxidoreductase activity	molecular_function	7	LOC_Os01g47760	1	169	77	26868	0.385257
GO:0046983	protein dimerization activity	molecular_function	5	LOC_Os01g50940	1	169	79	26868	0.392988
GO:0005887	integral component of plasma membrane	cellular_component	6	LOC_Os04g35540;LOC_Os03g62200;LOC_Os03g11900	3	169	364	26868	0.401947
GO:0016709	oxidoreductase activity, acting on paired donors, with incorporation or reduction of molecular oxygen, NAD(P)H as one donor, and incorporation of one atom of oxygen	molecular_function	6	LOC_Os02g30780;LOC_Os09g10340	2	169	220	26868	0.403522
GO:0016301	kinase activity	molecular_function	6	LOC_Os12g02200;LOC_Os10g33040;LOC_Os08g24310;LOC_Os10g30600;LOC_Os05g44770;LOC_Os01g53920	6	169	815	26868	0.406583
GO:0003677	DNA binding	molecular_function	6	LOC_Os11g03300;LOC_Os05g45410;LOC_Os11g45740;LOC_Os04g49420;LOC_Os12g03290;LOC_Os10g41330;LOC_Os03g55590;LOC_Os11g03540;LOC_Os01g46870;LOC_Os01g50940	10	169	1432	26868	0.413527
GO:0003824	catalytic activity	molecular_function	3	LOC_Os10g37340;LOC_Os06g44170	2	169	227	26868	0.418813
GO:0044550	secondary metabolite biosynthetic process	biological_process	5	LOC_Os02g30780;LOC_Os09g10340	2	169	229	26868	0.423147
GO:0080167	response to karrikin	biological_process	5	LOC_Os05g35290	1	169	88	26868	0.426601
GO:0005351	carbohydrate:proton symporter activity	molecular_function	7	LOC_Os03g11900	1	169	90	26868	0.433815
GO:0009699	phenylpropanoid biosynthetic process	biological_process	7	LOC_Os05g35290	1	169	92	26868	0.440939
GO:0046982	protein heterodimerization activity	molecular_function	6	LOC_Os04g49420	1	169	95	26868	0.451459
GO:0006857	oligopeptide transport	biological_process	9	LOC_Os05g35650	1	169	95	26868	0.451459
GO:0005506	iron ion binding	molecular_function	8	LOC_Os01g63930	1	169	96	26868	0.454921
GO:0045454	cell redox homeostasis	biological_process	5	LOC_Os01g47760	1	169	97	26868	0.458362
GO:0031225	anchored component of membrane	cellular_component	5	LOC_Os10g05660	1	169	100	26868	0.468556
GO:0048046	apoplast	cellular_component	4	LOC_Os04g15920;LOC_Os02g14170	2	169	251	26868	0.469664
GO:0005634	nucleus	cellular_component	6	LOC_Os09g25060;LOC_Os02g45930;LOC_Os03g08330;LOC_Os10g02760;LOC_Os05g44900;LOC_Os12g03290;LOC_Os11g29870;LOC_Os09g25070;LOC_Os08g34790;LOC_Os05g25770;LOC_Os08g31980;LOC_Os10g33040;LOC_Os11g03540;LOC_Os06g36390;LOC_Os06g44010;LOC_Os10g25290;LOC_Os09g34930;LOC_Os01g50940;LOC_Os10g41330;LOC_Os11g45740;LOC_Os03g13210;LOC_Os03g53020;LOC_Os01g47760;LOC_Os10g02070;LOC_Os12g03040;LOC_Os01g61080;LOC_Os02g…	44	169	6869	26868	0.473612
GO:0009055	electron transfer activity	molecular_function	5	LOC_Os01g47760	1	169	107	26868	0.491605
GO:0000287	magnesium ion binding	molecular_function	7	LOC_Os02g02930	1	169	107	26868	0.491605
GO:0016310	phosphorylation	biological_process	7	LOC_Os08g24310;LOC_Os10g30600	2	169	269	26868	0.506029
GO:0009626	plant-type hypersensitive response	biological_process	6	LOC_Os12g26290	1	169	119	26868	0.528829
GO:0009735	response to cytokinin	biological_process	6	LOC_Os04g15920	1	169	121	26868	0.534764
GO:0005622	intracellular	cellular_component	4	LOC_Os06g11210;LOC_Os01g27230	2	169	286	26868	0.538866
GO:0042802	identical protein binding	molecular_function	5	LOC_Os07g34260;LOC_Os04g52440	2	169	289	26868	0.544504
GO:0009570	chloroplast stroma	cellular_component	8	LOC_Os07g09190;LOC_Os05g03030;LOC_Os06g07960	3	169	453	26868	0.544552
GO:0006508	proteolysis	biological_process	7	LOC_Os04g45270;LOC_Os02g48900;LOC_Os09g30414	3	169	457	26868	0.550508
GO:0006629	lipid metabolic process	biological_process	5	LOC_Os12g26290	1	169	134	26868	0.571571
GO:0005615	extracellular space	cellular_component	4	LOC_Os11g13540	1	169	140	26868	0.587568
GO:0009555	pollen development	biological_process	6	LOC_Os05g35290	1	169	140	26868	0.587568
GO:0051603	proteolysis involved in cellular protein catabolic process	biological_process	8	LOC_Os05g18604	1	169	158	26868	0.632082
GO:0005507	copper ion binding	molecular_function	8	LOC_Os10g17454	1	169	158	26868	0.632082
GO:0055085	transmembrane transport	biological_process	6	LOC_Os01g50100	1	169	164	26868	0.645831
GO:0004364	glutathione transferase activity	molecular_function	6	LOC_Os10g38470	1	169	165	26868	0.648073
GO:0006749	glutathione metabolic process	biological_process	8	LOC_Os10g38470	1	169	166	26868	0.6503
GO:0045893	positive regulation of transcription, DNA-templated	biological_process	9	LOC_Os05g45410	1	169	166	26868	0.6503
GO:0044212	transcription regulatory region DNA binding	molecular_function	7	LOC_Os12g03040	1	169	176	26868	0.671816
GO:0007165	signal transduction	biological_process	4	LOC_Os01g53920;LOC_Os12g02200	2	169	376	26868	0.686958
GO:0016042	lipid catabolic process	biological_process	6	LOC_Os07g05110	1	169	187	26868	0.693967
GO:0004497	monooxygenase activity	molecular_function	5	LOC_Os03g55800	1	169	188	26868	0.695906
GO:0007166	cell surface receptor signaling pathway	biological_process	5	LOC_Os05g47770	1	169	196	26868	0.71098
GO:0009941	chloroplast envelope	cellular_component	7	LOC_Os03g52910;LOC_Os05g03030	2	169	395	26868	0.712758
GO:0008270	zinc ion binding	molecular_function	8	LOC_Os07g46920;LOC_Os12g12560;LOC_Os12g12580;LOC_Os11g10510;LOC_Os04g15920	5	169	945	26868	0.712964
GO:0052689	carboxylic ester hydrolase activity	molecular_function	6	LOC_Os03g15270	1	169	210	26868	0.735594
GO:0015031	protein transport	biological_process	9	LOC_Os08g07830	1	169	229	26868	0.765699
GO:0005215	transporter activity	molecular_function	3	LOC_Os05g35650	1	169	236	26868	0.775909
GO:0007169	transmembrane receptor protein tyrosine kinase signaling pathway	biological_process	7	LOC_Os08g24310	1	169	243	26868	0.785677
GO:0005802	trans-Golgi network	cellular_component	7	LOC_Os01g51870	1	169	254	26868	0.800178
GO:0005768	endosome	cellular_component	7	LOC_Os01g51870	1	169	261	26868	0.808893
GO:0005829	cytosol	cellular_component	6	LOC_Os10g37340;LOC_Os05g10650;LOC_Os04g58280;LOC_Os03g13300;LOC_Os07g14150;LOC_Os10g02760;LOC_Os04g49420;LOC_Os02g14170;LOC_Os11g10510	9	169	1807	26868	0.809079
GO:0005524	ATP binding	molecular_function	5	LOC_Os10g30600;LOC_Os12g02200;LOC_Os08g34790;LOC_Os05g44770;LOC_Os10g33040;LOC_Os08g24310;LOC_Os05g10650;LOC_Os10g17454;LOC_Os06g48250	9	169	1807	26868	0.809079
GO:0016020	membrane	cellular_component	3	LOC_Os04g32920;LOC_Os09g10340;LOC_Os10g33040;LOC_Os05g35650;LOC_Os02g30780;LOC_Os05g44770	6	169	1294	26868	0.828732
GO:0004672	protein kinase activity	molecular_function	7	LOC_Os10g30600	1	169	295	26868	0.846139
GO:0005794	Golgi apparatus	cellular_component	6	LOC_Os04g49420;LOC_Os03g09140;LOC_Os02g14170;LOC_Os11g10510	4	169	955	26868	0.855052
GO:0009793	embryo development ending in seed dormancy	biological_process	5	LOC_Os01g21250	1	169	308	26868	0.858388
GO:0006412	translation	biological_process	8	LOC_Os05g03030	1	169	310	26868	0.860185
GO:0031146	SCF-dependent proteasomal ubiquitin-dependent protein catabolic process	biological_process	12	LOC_Os01g45020	1	169	329	26868	0.87616
GO:0016757	transferase activity, transferring glycosyl groups	molecular_function	5	LOC_Os08g31980	1	169	333	26868	0.879285
GO:0016021	integral component of membrane	cellular_component	5	LOC_Os02g11070;LOC_Os09g34930;LOC_Os09g29660;LOC_Os01g50100;LOC_Os01g53920;LOC_Os05g35650;LOC_Os08g24310;LOC_Os05g44770;LOC_Os06g48250;LOC_Os10g33040;LOC_Os08g29570;LOC_Os03g52910;LOC_Os01g29330;LOC_Os07g17330;LOC_Os01g63930;LOC_Os01g42380	16	169	3260	26868	0.884495
GO:0005739	mitochondrion	cellular_component	6	LOC_Os08g07830;LOC_Os01g21250;LOC_Os07g37730;LOC_Os07g46920;LOC_Os08g04630;LOC_Os01g68650;LOC_Os07g17330;LOC_Os10g17454	8	169	1813	26868	0.89017
GO:0004842	ubiquitin-protein transferase activity	molecular_function	6	LOC_Os01g45020;LOC_Os11g14140	2	169	614	26868	0.901164
GO:0009813	flavonoid biosynthetic process	biological_process	6	LOC_Os07g34260	1	169	366	26868	0.902245
GO:0019005	SCF ubiquitin ligase complex	cellular_component	7	LOC_Os01g45020	1	169	367	26868	0.902869
GO:0005618	cell wall	cellular_component	5	LOC_Os03g58980;LOC_Os02g14170	2	169	632	26868	0.909902
GO:0003735	structural constituent of ribosome	molecular_function	4	LOC_Os05g03030	1	169	386	26868	0.91399
GO:0043231	intracellular membrane-bounded organelle	cellular_component	5	LOC_Os01g63930	1	169	411	26868	0.926716
GO:0009507	chloroplast	cellular_component	7	LOC_Os01g29330;LOC_Os07g09190;LOC_Os01g21250;LOC_Os06g07960;LOC_Os01g54340;LOC_Os03g04370;LOC_Os02g02930;LOC_Os05g03030;LOC_Os12g24020;LOC_Os04g49420	10	169	2398	26868	0.941931
GO:0003723	RNA binding	molecular_function	6	LOC_Os10g17454	1	169	530	26868	0.965874
GO:0005783	endoplasmic reticulum	cellular_component	6	LOC_Os06g48250	1	169	570	26868	0.973626

## Sheet: Table S3-5
Table S3-5 GO enrichment analysis of S0_S24-up DEGs.
GO_ID	GO_Term	GO_function	GO_class	Genes	S gene number	TS gene number	B gene number	TB gene number	pvalue
GO:0009611	response to wounding	biological_process	5	LOC_Os02g48770;LOC_Os10g25290;LOC_Os03g17700;LOC_Os08g34790;LOC_Os09g23650;LOC_Os03g08320;LOC_Os09g25060;LOC_Os06g13560;LOC_Os01g63930;LOC_Os03g08330;LOC_Os05g35290;LOC_Os04g48850;LOC_Os03g28940;LOC_Os04g37430;LOC_Os08g39850;LOC_Os03g60080	16	254	228	26868	6.35094e-10
GO:0010200	response to chitin	biological_process	7	LOC_Os02g32590;LOC_Os01g61080;LOC_Os02g52210;LOC_Os05g45410;LOC_Os09g25060;LOC_Os10g41330;LOC_Os05g25770;LOC_Os01g53920;LOC_Os01g14440;LOC_Os03g17700	10	254	107	26868	7.51347e-08
GO:0031347	regulation of defense response	biological_process	7	LOC_Os02g03760;LOC_Os09g25060;LOC_Os09g23650;LOC_Os03g08330;LOC_Os05g25770;LOC_Os10g25290;LOC_Os03g08320;LOC_Os03g28940	8	254	63	26868	1.4127e-07
GO:0006952	defense response	biological_process	5	LOC_Os07g35330;LOC_Os07g35690;LOC_Os06g44010;LOC_Os06g11240;LOC_Os02g08440;LOC_Os05g35290;LOC_Os04g56430;LOC_Os03g20090;LOC_Os07g35290;LOC_Os11g11960;LOC_Os11g45740;LOC_Os04g48850;LOC_Os11g39420;LOC_Os01g53920;LOC_Os01g21250;LOC_Os12g17430;LOC_Os07g14740;LOC_Os04g37430;LOC_Os01g03690;LOC_Os12g28100;LOC_Os04g43440;LOC_Os07g35390;LOC_Os07g35370;LOC_Os11g12320;LOC_Os09g25070	25	254	835	26868	4.32518e-07
GO:1903507	negative regulation of nucleic acid-templated transcription	biological_process	10	LOC_Os03g28940;LOC_Os10g25290;LOC_Os03g08320;LOC_Os03g08330;LOC_Os09g23650	5	254	21	26868	1.30524e-06
GO:0006979	response to oxidative stress	biological_process	5	LOC_Os01g21250;LOC_Os03g17700;LOC_Os02g14170;LOC_Os12g26290;LOC_Os06g35480;LOC_Os04g41960;LOC_Os03g13210;LOC_Os10g02070;LOC_Os05g35290;LOC_Os04g48850;LOC_Os01g53730	11	254	194	26868	2.6073e-06
GO:0003714	transcription corepressor activity	molecular_function	5	LOC_Os03g08330;LOC_Os03g28940;LOC_Os09g23650;LOC_Os03g08320;LOC_Os10g25290	5	254	27	26868	4.94368e-06
GO:0009620	response to fungus	biological_process	7	LOC_Os03g60080;LOC_Os04g37430;LOC_Os03g20090;LOC_Os11g44680;LOC_Os08g34790;LOC_Os11g45740	6	254	52	26868	9.51739e-06
GO:0031408	oxylipin biosynthetic process	biological_process	11	LOC_Os06g13560;LOC_Os04g37430;LOC_Os02g48770;LOC_Os12g26290;LOC_Os06g11240	5	254	31	26868	1.00885e-05
GO:2000022	regulation of jasmonic acid mediated signaling pathway	biological_process	8	LOC_Os03g08320;LOC_Os03g08330;LOC_Os09g23650;LOC_Os03g28940;LOC_Os10g25290	5	254	33	26868	1.38762e-05
GO:0050832	defense response to fungus	biological_process	8	LOC_Os02g52210;LOC_Os12g26290;LOC_Os01g53920;LOC_Os03g58580;LOC_Os05g25770;LOC_Os01g61080;LOC_Os09g25060;LOC_Os05g46020;LOC_Os03g04060;LOC_Os10g39680	10	254	190	26868	1.4323e-05
GO:0009685	gibberellin metabolic process	biological_process	10	LOC_Os06g44010;LOC_Os09g25070;LOC_Os02g08440;LOC_Os02g36210	4	254	17	26868	1.68517e-05
GO:0003700	DNA-binding transcription factor activity	molecular_function	4	LOC_Os05g46020;LOC_Os06g44010;LOC_Os09g25060;LOC_Os11g45740;LOC_Os01g01870;LOC_Os09g25070;LOC_Os11g44680;LOC_Os01g14440;LOC_Os02g32590;LOC_Os11g03540;LOC_Os05g45410;LOC_Os01g46870;LOC_Os01g64360;LOC_Os11g03300;LOC_Os12g03290;LOC_Os01g50940;LOC_Os03g20090;LOC_Os12g03040;LOC_Os01g61080;LOC_Os05g37190;LOC_Os08g09840;LOC_Os10g41330;LOC_Os01g64310;LOC_Os02g08440;LOC_Os11g29870;LOC_Os01g60640;LOC_Os05g…	29	254	1353	26868	3.57135e-05
GO:0004674	protein serine/threonine kinase activity	molecular_function	8	LOC_Os11g03820;LOC_Os04g30250;LOC_Os07g35370;LOC_Os05g44770;LOC_Os02g02120;LOC_Os02g06930;LOC_Os04g56430;LOC_Os08g10290;LOC_Os09g30454;LOC_Os02g48210;LOC_Os11g44560;LOC_Os11g07225;LOC_Os09g39650;LOC_Os07g35290;LOC_Os01g04570;LOC_Os07g35390;LOC_Os02g56380;LOC_Os04g30010;LOC_Os04g30240;LOC_Os04g34270;LOC_Os11g39420;LOC_Os03g56250;LOC_Os10g33040;LOC_Os05g47770;LOC_Os07g35330;LOC_Os07g04040;LOC_Os03g…	30	254	1453	26868	5.15857e-05
GO:0007166	cell surface receptor signaling pathway	biological_process	5	LOC_Os02g02120;LOC_Os04g30250;LOC_Os02g56380;LOC_Os09g30454;LOC_Os05g47770;LOC_Os04g30240;LOC_Os04g30010;LOC_Os11g44560;LOC_Os01g04570	9	254	196	26868	0.000110263
GO:0009753	response to jasmonic acid	biological_process	6	LOC_Os11g45740;LOC_Os03g60080;LOC_Os05g25770;LOC_Os04g37430;LOC_Os03g20090;LOC_Os04g48850;LOC_Os12g03040	7	254	116	26868	0.000120689
GO:0005886	plasma membrane	cellular_component	4	LOC_Os07g35290;LOC_Os01g42410;LOC_Os01g04570;LOC_Os02g55970;LOC_Os09g39650;LOC_Os07g35690;LOC_Os01g53920;LOC_Os07g35330;LOC_Os09g30454;LOC_Os01g62430;LOC_Os05g35650;LOC_Os03g52910;LOC_Os04g30010;LOC_Os02g48210;LOC_Os03g13840;LOC_Os05g34270;LOC_Os04g30250;LOC_Os11g03820;LOC_Os04g56430;LOC_Os03g56250;LOC_Os09g25760;LOC_Os04g30240;LOC_Os07g35390;LOC_Os08g03350;LOC_Os10g30600;LOC_Os05g47770;LOC_Os07g…	55	254	3569	26868	0.00015152
GO:0008061	chitin binding	molecular_function	5	LOC_Os10g39680;LOC_Os11g37960;LOC_Os03g04060;LOC_Os01g47070;LOC_Os11g37950	5	254	60	26868	0.000259439
GO:0004568	chitinase activity	molecular_function	7	LOC_Os01g47070;LOC_Os11g37960;LOC_Os11g37950;LOC_Os03g04060;LOC_Os10g39680	5	254	62	26868	0.000302715
GO:0009723	response to ethylene	biological_process	6	LOC_Os10g41200;LOC_Os03g20090;LOC_Os04g48850;LOC_Os11g37950;LOC_Os01g21250;LOC_Os11g45740;LOC_Os11g37960	7	254	143	26868	0.000436226
GO:0009695	jasmonic acid biosynthetic process	biological_process	10	LOC_Os04g37430;LOC_Os02g48770;LOC_Os06g11240;LOC_Os06g13560	4	254	38	26868	0.00044721
GO:0046658	anchored component of plasma membrane	cellular_component	6	LOC_Os04g33640;LOC_Os01g71340;LOC_Os08g37660;LOC_Os09g39940;LOC_Os05g31140;LOC_Os10g35460;LOC_Os01g51570;LOC_Os01g55820;LOC_Os07g14740	9	254	237	26868	0.000451004
GO:0046323	glucose import	biological_process	12	LOC_Os03g10100;LOC_Os07g01560;LOC_Os07g37320;LOC_Os03g11900;LOC_Os07g39350	5	254	71	26868	0.000568508
GO:0005355	glucose transmembrane transporter activity	molecular_function	9	LOC_Os03g11900;LOC_Os07g01560;LOC_Os03g10100;LOC_Os07g39350;LOC_Os07g37320	5	254	71	26868	0.000568508
GO:0009627	systemic acquired resistance	biological_process	7	LOC_Os11g37950;LOC_Os11g37960;LOC_Os12g26290	3	254	20	26868	0.000845027
GO:0080027	response to herbivore	biological_process	7	LOC_Os11g37950;LOC_Os11g37960	2	254	5	26868	0.000873641
GO:0042742	defense response to bacterium	biological_process	8	LOC_Os11g44680;LOC_Os11g37960;LOC_Os05g25770;LOC_Os01g61080;LOC_Os09g25060;LOC_Os11g37950;LOC_Os05g34270;LOC_Os12g26290	8	254	209	26868	0.000882697
GO:0080163	regulation of protein serine/threonine phosphatase activity	biological_process	12	LOC_Os12g36830;LOC_Os12g36850;LOC_Os12g36880	3	254	22	26868	0.00112571
GO:0006351	transcription, DNA-templated	biological_process	8	LOC_Os02g42585;LOC_Os01g46870;LOC_Os05g46020;LOC_Os11g03300;LOC_Os01g64360;LOC_Os01g50940;LOC_Os02g32590;LOC_Os02g48320;LOC_Os01g64310;LOC_Os10g41330;LOC_Os01g14440;LOC_Os11g03540;LOC_Os05g37190;LOC_Os01g61080;LOC_Os03g60080;LOC_Os05g45410;LOC_Os09g25060;LOC_Os11g29870;LOC_Os12g03040;LOC_Os11g45740;LOC_Os03g20090;LOC_Os05g25770;LOC_Os01g60640	23	254	1215	26868	0.00129285
GO:0009867	jasmonic acid mediated signaling pathway	biological_process	6	LOC_Os05g46020;LOC_Os01g47760;LOC_Os02g48770;LOC_Os06g13560	4	254	51	26868	0.00137543
GO:0010427	abscisic acid binding	molecular_function	6	LOC_Os12g36880;LOC_Os12g36850;LOC_Os12g36830	3	254	24	26868	0.00145902
GO:0004864	protein phosphatase inhibitor activity	molecular_function	7	LOC_Os12g36850;LOC_Os12g36830;LOC_Os12g36880	3	254	24	26868	0.00145902
GO:0010183	pollen tube guidance	biological_process	4	LOC_Os10g33040;LOC_Os03g29190;LOC_Os03g17700	3	254	25	26868	0.00164647
GO:0005351	carbohydrate:proton symporter activity	molecular_function	7	LOC_Os07g01560;LOC_Os03g10100;LOC_Os03g11900;LOC_Os07g39350;LOC_Os07g37320	5	254	90	26868	0.0016599
GO:0004601	peroxidase activity	molecular_function	4	LOC_Os12g26290;LOC_Os02g14170;LOC_Os01g73200;LOC_Os03g13210;LOC_Os10g02070;LOC_Os01g22249;LOC_Os06g35480	7	254	182	26868	0.00178843
GO:0016114	terpenoid biosynthetic process	biological_process	9	LOC_Os02g02930;LOC_Os07g09190	2	254	7	26868	0.00181183
GO:0004834	tryptophan synthase activity	molecular_function	7	LOC_Os03g58300;LOC_Os03g58290	2	254	7	26868	0.00181183
GO:0009651	response to salt stress	biological_process	6	LOC_Os03g20090;LOC_Os11g37950;LOC_Os12g24320;LOC_Os02g42585;LOC_Os11g45740;LOC_Os12g03290;LOC_Os03g13840;LOC_Os11g37960;LOC_Os01g61080;LOC_Os10g35460	10	254	351	26868	0.00198425
GO:0031640	killing of cells of other organism	biological_process	4	LOC_Os11g37950;LOC_Os11g37960	2	254	8	26868	0.00240073
GO:0010120	camalexin biosynthetic process	biological_process	9	LOC_Os01g61080;LOC_Os03g17700	2	254	8	26868	0.00240073
GO:1901959	positive regulation of cutin biosynthetic process	biological_process	9	LOC_Os12g03290;LOC_Os11g03540	2	254	8	26868	0.00240073
GO:0045723	positive regulation of fatty acid biosynthetic process	biological_process	9	LOC_Os12g03290;LOC_Os11g03540	2	254	8	26868	0.00240073
GO:0005887	integral component of plasma membrane	cellular_component	6	LOC_Os01g11160;LOC_Os03g11900;LOC_Os04g35540;LOC_Os03g10100;LOC_Os02g34580;LOC_Os07g37320;LOC_Os03g62200;LOC_Os07g01560;LOC_Os07g39350;LOC_Os10g30790	10	254	364	26868	0.00258003
GO:0006468	protein phosphorylation	biological_process	9	LOC_Os07g35390;LOC_Os04g56430;LOC_Os11g03820;LOC_Os03g56160;LOC_Os09g39620;LOC_Os04g34270;LOC_Os10g33040;LOC_Os07g35330;LOC_Os07g35690;LOC_Os11g07225;LOC_Os07g04040;LOC_Os05g34270;LOC_Os03g56250;LOC_Os07g35370;LOC_Os01g04570;LOC_Os05g44770;LOC_Os02g48210;LOC_Os09g39650;LOC_Os11g39420;LOC_Os07g35290;LOC_Os01g03690;LOC_Os10g30600	22	254	1222	26868	0.00303199
GO:0046916	cellular transition metal ion homeostasis	biological_process	11	LOC_Os04g49260;LOC_Os09g09830;LOC_Os04g39320;LOC_Os04g39350;LOC_Os02g37330	5	254	104	26868	0.00312247
GO:0046914	transition metal ion binding	molecular_function	7	LOC_Os02g37330;LOC_Os04g39350;LOC_Os04g39320;LOC_Os04g49260;LOC_Os09g09830	5	254	104	26868	0.00312247
GO:0004540	ribonuclease activity	molecular_function	7	LOC_Os11g37960;LOC_Os11g37950	2	254	10	26868	0.00381045
GO:0030247	polysaccharide binding	molecular_function	5	LOC_Os05g31140;LOC_Os04g33640;LOC_Os01g51570;LOC_Os01g55820;LOC_Os01g71340	5	254	110	26868	0.00397069
GO:0030001	metal ion transport	biological_process	8	LOC_Os09g09830;LOC_Os02g37330;LOC_Os04g49260;LOC_Os04g39350;LOC_Os04g39320	5	254	113	26868	0.0044514
GO:0030170	pyridoxal phosphate binding	molecular_function	6	LOC_Os03g13300;LOC_Os04g52440;LOC_Os03g58290;LOC_Os03g58300;LOC_Os04g48850	5	254	114	26868	0.00462045
GO:0042744	hydrogen peroxide catabolic process	biological_process	8	LOC_Os10g02070;LOC_Os02g14170;LOC_Os06g35480;LOC_Os03g13210	4	254	72	26868	0.00485295
GO:0009751	response to salicylic acid	biological_process	6	LOC_Os09g25060;LOC_Os03g60080;LOC_Os05g25770;LOC_Os12g26290;LOC_Os03g56160;LOC_Os01g47760	6	254	166	26868	0.00508299
GO:0020037	heme binding	molecular_function	6	LOC_Os12g26290;LOC_Os01g63930;LOC_Os02g14170;LOC_Os06g35480;LOC_Os03g13210;LOC_Os10g02070	6	254	167	26868	0.00523174
GO:0003959	NADPH dehydrogenase activity	molecular_function	6	LOC_Os06g11240;LOC_Os06g11210	2	254	12	26868	0.00551943
GO:0030795	jasmonate O-methyltransferase activity	molecular_function	8	LOC_Os02g48770;LOC_Os06g13560	2	254	12	26868	0.00551943
GO:0071456	cellular response to hypoxia	biological_process	6	LOC_Os11g44680;LOC_Os09g29710	2	254	12	26868	0.00551943
GO:0002237	response to molecule of bacterial origin	biological_process	6	LOC_Os11g44680;LOC_Os09g25060	2	254	13	26868	0.00648249
GO:0009873	ethylene-activated signaling pathway	biological_process	7	LOC_Os10g41330;LOC_Os01g14440;LOC_Os02g42585;LOC_Os12g03290;LOC_Os11g03540;LOC_Os01g46870	6	254	178	26868	0.00708558
GO:0019740	nitrogen utilization	biological_process	3	LOC_Os03g62200;LOC_Os02g34580	2	254	14	26868	0.00751601
GO:0072488	ammonium transmembrane transport	biological_process	9	LOC_Os03g62200;LOC_Os02g34580	2	254	14	26868	0.00751601
GO:0008519	ammonium transmembrane transporter activity	molecular_function	7	LOC_Os02g34580;LOC_Os03g62200	2	254	14	26868	0.00751601
GO:0015695	organic cation transport	biological_process	8	LOC_Os03g62200;LOC_Os02g34580	2	254	14	26868	0.00751601
GO:0042626	ATPase-coupled transmembrane transporter activity	molecular_function	8	LOC_Os08g29570;LOC_Os01g50100;LOC_Os08g43120;LOC_Os01g42380;LOC_Os01g42410	5	254	130	26868	0.00798269
GO:0009506	plasmodesma	cellular_component	5	LOC_Os07g35290;LOC_Os01g03690;LOC_Os07g35690;LOC_Os07g35330;LOC_Os12g44110;LOC_Os04g56430;LOC_Os07g14740;LOC_Os03g56250;LOC_Os07g35390;LOC_Os09g25760;LOC_Os11g39420;LOC_Os05g34270;LOC_Os03g58580;LOC_Os10g33040;LOC_Os07g35370	15	254	791	26868	0.00865207
GO:0001561	fatty acid alpha-oxidation	biological_process	11	LOC_Os12g26290	1	254	1	26868	0.00945363
GO:0071901	negative regulation of protein serine/threonine kinase activity	biological_process	12	LOC_Os03g01740	1	254	1	26868	0.00945363
GO:0034007	S-linalool synthase activity	molecular_function	7	LOC_Os02g02930	1	254	1	26868	0.00945363
GO:0050691	regulation of defense response to virus by host	biological_process	8	LOC_Os09g25060	1	254	1	26868	0.00945363
GO:0010055	atrichoblast differentiation	biological_process	8	LOC_Os11g29870	1	254	1	26868	0.00945363
GO:0032440	2-alkenal reductase [NAD(P)] activity	molecular_function	7	LOC_Os04g41960	1	254	1	26868	0.00945363
GO:0000169	activation of MAPK activity involved in osmosensory signaling pathway	biological_process	14	LOC_Os03g17700	1	254	1	26868	0.00945363
GO:0034614	cellular response to reactive oxygen species	biological_process	7	LOC_Os12g26290	1	254	1	26868	0.00945363
GO:0032107	regulation of response to nutrient levels	biological_process	8	LOC_Os11g29870	1	254	1	26868	0.00945363
GO:0009817	defense response to fungus, incompatible interaction	biological_process	7	LOC_Os11g37950;LOC_Os11g37960	2	254	17	26868	0.0110254
GO:0000162	tryptophan biosynthetic process	biological_process	11	LOC_Os03g58300;LOC_Os03g58290	2	254	17	26868	0.0110254
GO:0006355	regulation of transcription, DNA-templated	biological_process	8	LOC_Os03g60080;LOC_Os09g25060;LOC_Os10g41330;LOC_Os11g45740;LOC_Os11g03540;LOC_Os01g64310;LOC_Os11g29870;LOC_Os01g50940;LOC_Os01g14440;LOC_Os05g25770;LOC_Os12g03040;LOC_Os01g61080;LOC_Os11g44680;LOC_Os01g46870;LOC_Os03g20090;LOC_Os05g37190;LOC_Os12g03290;LOC_Os02g42585;LOC_Os11g03300;LOC_Os01g60640;LOC_Os02g32590;LOC_Os05g45410;LOC_Os02g48320;LOC_Os01g64360;LOC_Os05g46020	25	254	1627	26868	0.0117092
GO:0051762	sesquiterpene biosynthetic process	biological_process	10	LOC_Os04g27670;LOC_Os04g01810	2	254	18	26868	0.0123269
GO:0009694	jasmonic acid metabolic process	biological_process	9	LOC_Os06g13560;LOC_Os02g48770	2	254	18	26868	0.0123269
GO:0051707	response to other organism	biological_process	6	LOC_Os08g39850;LOC_Os12g26290;LOC_Os10g05660	3	254	52	26868	0.0131244
GO:0055114	oxidation-reduction process	biological_process	4	LOC_Os12g12560;LOC_Os06g11210;LOC_Os04g53810;LOC_Os07g46852;LOC_Os10g02070;LOC_Os03g13210;LOC_Os04g33240;LOC_Os12g12580;LOC_Os02g14170;LOC_Os01g63930;LOC_Os06g35480;LOC_Os04g15920;LOC_Os01g47760;LOC_Os03g29190;LOC_Os04g41960	15	254	852	26868	0.0160866
GO:0000302	response to reactive oxygen species	biological_process	6	LOC_Os01g21250;LOC_Os05g45410	2	254	21	26868	0.0166079
GO:0009737	response to abscisic acid	biological_process	6	LOC_Os03g20090;LOC_Os11g45740;LOC_Os03g58790;LOC_Os12g24320;LOC_Os01g55690;LOC_Os12g26290;LOC_Os12g03290;LOC_Os01g21250	8	254	345	26868	0.0173733
GO:0043565	sequence-specific DNA binding	molecular_function	7	LOC_Os11g44680;LOC_Os05g46020;LOC_Os02g32590;LOC_Os09g25060;LOC_Os05g45410;LOC_Os01g60640;LOC_Os05g25770;LOC_Os01g61080;LOC_Os01g14440	9	254	417	26868	0.0182868
GO:0010224	response to UV-B	biological_process	8	LOC_Os11g44680;LOC_Os05g35290;LOC_Os03g17700	3	254	59	26868	0.0184005
GO:0043620	regulation of DNA-templated transcription in response to stress	biological_process	9	LOC_Os11g29870	1	254	2	26868	0.0188182
GO:0080169	cellular response to boron-containing substance deprivation	biological_process	9	LOC_Os01g14440	1	254	2	26868	0.0188182
GO:2000037	regulation of stomatal complex patterning	biological_process	7	LOC_Os03g17700	1	254	2	26868	0.0188182
GO:0048530	fruit morphogenesis	biological_process	5	LOC_Os01g11600	1	254	2	26868	0.0188182
GO:0034440	lipid oxidation	biological_process	8	LOC_Os04g37430	1	254	2	26868	0.0188182
GO:0080136	priming of cellular response to stress	biological_process	7	LOC_Os03g17700	1	254	2	26868	0.0188182
GO:0052865	1-deoxy-D-xylulose 5-phosphate biosynthetic process	biological_process	8	LOC_Os07g09190	1	254	2	26868	0.0188182
GO:0009697	salicylic acid biosynthetic process	biological_process	8	LOC_Os11g44680	1	254	2	26868	0.0188182
GO:0031304	intrinsic component of mitochondrial inner membrane	cellular_component	7	LOC_Os07g37730	1	254	2	26868	0.0188182
GO:0045551	cinnamyl-alcohol dehydrogenase activity	molecular_function	7	LOC_Os06g44170;LOC_Os04g15920	2	254	23	26868	0.0197629
GO:0051213	dioxygenase activity	molecular_function	5	LOC_Os10g39140;LOC_Os03g03034;LOC_Os04g49194;LOC_Os04g49210	4	254	116	26868	0.024533
GO:0006855	drug transmembrane transport	biological_process	7	LOC_Os04g48290;LOC_Os04g30490;LOC_Os10g20470	3	254	66	26868	0.02469
GO:0010334	sesquiterpene synthase activity	molecular_function	8	LOC_Os04g27670;LOC_Os04g01810	2	254	26	26868	0.0249218
GO:0009825	multidimensional cell growth	biological_process	5	LOC_Os10g35460;LOC_Os11g31950	2	254	26	26868	0.0249218
GO:0090448	glucosinolate:proton symporter activity	molecular_function	8	LOC_Os12g44110	1	254	3	26868	0.0280946
GO:1901349	glucosinolate transport	biological_process	9	LOC_Os12g44110	1	254	3	26868	0.0280946
GO:0008661	1-deoxy-D-xylulose-5-phosphate synthase activity	molecular_function	6	LOC_Os07g09190	1	254	3	26868	0.0280946
GO:0080142	regulation of salicylic acid biosynthetic process	biological_process	9	LOC_Os11g44680	1	254	3	26868	0.0280946
GO:0004788	thiamine diphosphokinase activity	molecular_function	7	LOC_Os05g30454	1	254	3	26868	0.0280946
GO:0090449	phloem glucosinolate loading	biological_process	9	LOC_Os12g44110	1	254	3	26868	0.0280946
GO:1902609	(R)-2-hydroxy-alpha-linolenic acid biosynthetic process	biological_process	12	LOC_Os12g26290	1	254	3	26868	0.0280946
GO:0052747	sinapyl alcohol dehydrogenase activity	molecular_function	7	LOC_Os04g15920	1	254	3	26868	0.0280946
GO:0016838	carbon-oxygen lyase activity, acting on phosphates	molecular_function	6	LOC_Os04g01810	1	254	3	26868	0.0280946
GO:0016166	phytoene dehydrogenase activity	molecular_function	6	LOC_Os08g39850	1	254	3	26868	0.0280946
GO:1901430	positive regulation of syringal lignin biosynthetic process	biological_process	9	LOC_Os02g14170;LOC_Os06g35480	2	254	28	26868	0.0286313
GO:0004553	hydrolase activity, hydrolyzing O-glycosyl compounds	molecular_function	6	LOC_Os01g71340;LOC_Os04g33640;LOC_Os01g55820;LOC_Os05g31140;LOC_Os01g51570	5	254	184	26868	0.0309598
GO:0009409	response to cold	biological_process	5	LOC_Os12g24320;LOC_Os02g11070;LOC_Os01g21250;LOC_Os01g61080;LOC_Os03g13840;LOC_Os03g17700	6	254	250	26868	0.0320881
GO:0016874	ligase activity	molecular_function	4	LOC_Os09g39650;LOC_Os10g40490;LOC_Os09g39620;LOC_Os02g52210	4	254	129	26868	0.0343533
GO:0010431	seed maturation	biological_process	5	LOC_Os12g24320;LOC_Os01g55690	2	254	32	26868	0.0366578
[truncated: 313 more rows]
